# Supplementary material for: Hexokinases link DJ-1 to the PINK1/parkin pathway
Source: Mol Neurodegener. 2017 Sep 29;12:70. doi: 10.1186/s13024-017-0212-x (PMC5622528; doi:10.1186/s13024-017-0212-x)
Supplement: Supplementary file 1 — Complete list of proteins quantified using iTRAQ in DJ-1 knockout rodent brains (XLSX 309 kb) [file 13024_2017_212_MOESM1_ESM.xlsx]

## Sheet: Rat Cytosol Enriched
Entry	Entry Name	Description	Log2(DJ-1 KO/WT)	Raw P Value	BH Adjusted P Value
O88767	PARK7_RAT	Protein DJ-1 OS=Rattus norvegicus GN=Park7 PE=1 SV=1	-2.95234	1.03e-12	1.03e-09
P19527	NFL_RAT	Neurofilament light polypeptide OS=Rattus norvegicus GN=Nefl PE=1 SV=3	-0.551322	5.08e-05	0.0168509
P12839	NFM_RAT	Neurofilament medium polypeptide OS=Rattus norvegicus GN=Nefm PE=1 SV=4	-0.500294	3.52e-05	0.0168509
O08651	SERA_RAT	D-3-phosphoglycerate dehydrogenase OS=Rattus norvegicus GN=Phgdh PE=1 SV=3	-0.252262	7.08e-05	0.0176116
Q811X6	CRYL1_RAT	Lambda-crystallin homolog OS=Rattus norvegicus GN=Cryl1 PE=2 SV=3	0.328856	0.000132656	0.0219988
Q0VGK0	GBRL1_RAT	Gamma-aminobutyric acid receptor-associated protein-like 1 OS=Rattus norvegicus GN=Gabarapl1 PE=1 SV=1	0.331042	0.000125097	0.0219988
P05708	HXK1_RAT	Hexokinase-1 OS=Rattus norvegicus GN=Hk1 PE=1 SV=4	0.220747	0.00020885	0.0296865
P61206	ARF3_RAT	ADP-ribosylation factor 3 OS=Rattus norvegicus GN=Arf3 PE=1 SV=2	0.602989	0.000335717	0.0417548
Q05683	DCE2_RAT	Glutamate decarboxylase 2 OS=Rattus norvegicus GN=Gad2 PE=1 SV=1	0.143709	0.000485894	0.0458046
P55053	FABP5_RAT	Fatty acid-binding protein, epidermal OS=Rattus norvegicus GN=Fabp5 PE=1 SV=3	-0.470065	0.000426013	0.0458046
P47245	NRDC_RAT	Nardilysin OS=Rattus norvegicus GN=Nrd1 PE=2 SV=1	-0.220541	0.000506383	0.0458046
P17475	A1AT_RAT	Alpha-1-antiproteinase OS=Rattus norvegicus GN=Serpina1 PE=1 SV=2	-0.416198	0.000561012	0.0465172
P56574	IDHP_RAT	Isocitrate dehydrogenase [NADP], mitochondrial OS=Rattus norvegicus GN=Idh2 PE=1 SV=2	0.495148	0.000739411	0.052551
P16884	NFH_RAT	Neurofilament heavy polypeptide OS=Rattus norvegicus GN=Nefh PE=1 SV=4	-0.45657	0.000715638	0.052551
Q03626	MUG1_RAT	Murinoglobulin-1 OS=Rattus norvegicus GN=Mug1 PE=2 SV=1	0.44373	0.000792619	0.0525771
P37996	ARL3_RAT	ADP-ribosylation factor-like protein 3 OS=Rattus norvegicus GN=Arl3 PE=1 SV=2	-0.176622	0.00139139	0.086527
P07632	SODC_RAT	Superoxide dismutase [Cu-Zn] OS=Rattus norvegicus GN=Sod1 PE=1 SV=2	0.248332	0.00183206	0.10723
P20059	HEMO_RAT	Hemopexin OS=Rattus norvegicus GN=Hpx PE=1 SV=3	-0.423618	0.0020082	0.111009
O08730	GLYG_RAT	Glycogenin-1 OS=Rattus norvegicus GN=Gyg1 PE=2 SV=4	-0.120098	0.00225754	0.112313
P25113	PGAM1_RAT	Phosphoglycerate mutase 1 OS=Rattus norvegicus GN=Pgam1 PE=1 SV=4	-0.166519	0.00214844	0.112313
Q6AYR6	HDHD2_RAT	Haloacid dehalogenase-like hydrolase domain-containing protein 2 OS=Rattus norvegicus GN=Hdhd2 PE=2 SV=1	0.592915	0.00266898	0.123869
Q6B345	S10AB_RAT	Protein S100-A11 OS=Rattus norvegicus GN=S100a11 PE=3 SV=1	0.308592	0.0027388	0.123869
P28037	AL1L1_RAT	Cytosolic 10-formyltetrahydrofolate dehydrogenase OS=Rattus norvegicus GN=Aldh1l1 PE=1 SV=3	0.227626	0.00306626	0.131978
P62898	CYC_RAT	Cytochrome c, somatic OS=Rattus norvegicus GN=Cycs PE=1 SV=2	0.22241	0.0034565	0.131978
Q6P7Q4	LGUL_RAT	Lactoylglutathione lyase OS=Rattus norvegicus GN=Glo1 PE=1 SV=3	0.213886	0.00335203	0.131978
Q99MS0	S14L2_RAT	SEC14-like protein 2 OS=Rattus norvegicus GN=Sec14l2 PE=1 SV=1	0.141471	0.00358131	0.131978
P52632	STA5B_RAT	Signal transducer and activator of transcription 5B OS=Rattus norvegicus GN=Stat5b PE=2 SV=1	0.245711	0.00324237	0.131978
Q91ZN1	COR1A_RAT	Coronin-1A OS=Rattus norvegicus GN=Coro1a PE=1 SV=3	-0.114417	0.00414087	0.147149
P02650	APOE_RAT	Apolipoprotein E OS=Rattus norvegicus GN=Apoe PE=1 SV=2	0.179305	0.0044133	0.151422
P14046	A1I3_RAT	Alpha-1-inhibitor 3 OS=Rattus norvegicus GN=A1i3 PE=1 SV=1	0.365	0.00486056	0.161209
Q641Y5	ATG7_RAT	Ubiquitin-like modifier-activating enzyme ATG7 OS=Rattus norvegicus GN=Atg7 PE=2 SV=1	0.287884	0.00551191	0.176915
P07943	ALDR_RAT	Aldose reductase OS=Rattus norvegicus GN=Akr1b1 PE=1 SV=3	-0.173173	0.00642877	0.199607
Q5U300	UBA1_RAT	Ubiquitin-like modifier-activating enzyme 1 OS=Rattus norvegicus GN=Uba1 PE=1 SV=1	0.0456655	0.0067727	0.199607
P52759	UK114_RAT	Ribonuclease UK114 OS=Rattus norvegicus GN=Hrsp12 PE=1 SV=3	-0.232756	0.00682076	0.199607
P07150	ANXA1_RAT	Annexin A1 OS=Rattus norvegicus GN=Anxa1 PE=1 SV=2	0.252315	0.00921472	0.21792
Q8VHF5	CISY_RAT	Citrate synthase, mitochondrial OS=Rattus norvegicus GN=Cs PE=1 SV=1	0.258097	0.00882605	0.21792
O35824	DNJA2_RAT	DnaJ homolog subfamily A member 2 OS=Rattus norvegicus GN=Dnaja2 PE=2 SV=1	-0.232927	0.00913006	0.21792
P03994	HPLN1_RAT	Hyaluronan and proteoglycan link protein 1 OS=Rattus norvegicus GN=Hapln1 PE=1 SV=2	-0.177271	0.00894438	0.21792
P80299	HYES_RAT	Bifunctional epoxide hydrolase 2 OS=Rattus norvegicus GN=Ephx2 PE=1 SV=1	0.579246	0.00854728	0.21792
Q5GFD9	IMPCT_RAT	Protein IMPACT OS=Rattus norvegicus GN=Impact PE=2 SV=1	-0.101887	0.00869259	0.21792
Q9QZA2	PDC6I_RAT	Programmed cell death 6-interacting protein OS=Rattus norvegicus GN=Pdcd6ip PE=1 SV=2	-0.0779911	0.00941764	0.21792
Q9Z0V6	PRDX3_RAT	Thioredoxin-dependent peroxide reductase, mitochondrial OS=Rattus norvegicus GN=Prdx3 PE=1 SV=2	0.267042	0.009035	0.21792
Q91Y78	UCHL3_RAT	Ubiquitin carboxyl-terminal hydrolase isozyme L3 OS=Rattus norvegicus GN=Uchl3 PE=1 SV=1	-0.095828	0.00908605	0.21792
P50399	GDIB_RAT	Rab GDP dissociation inhibitor beta OS=Rattus norvegicus GN=Gdi2 PE=1 SV=2	-0.142393	0.0102806	0.229908
P39069	KAD1_RAT	Adenylate kinase isoenzyme 1 OS=Rattus norvegicus GN=Ak1 PE=1 SV=3	-0.527537	0.0103978	0.229908
Q9ER24	ATX10_RAT	Ataxin-10 OS=Rattus norvegicus GN=Atxn10 PE=1 SV=1	-0.151962	0.0109843	0.23254
P13084	NPM_RAT	Nucleophosmin OS=Rattus norvegicus GN=Npm1 PE=1 SV=1	-0.177936	0.0108193	0.23254
P08082	CLCB_RAT	Clathrin light chain B OS=Rattus norvegicus GN=Cltb PE=1 SV=1	0.0810982	0.0129293	0.235493
Q66HD0	ENPL_RAT	Endoplasmin OS=Rattus norvegicus GN=Hsp90b1 PE=1 SV=2	-0.195002	0.0130104	0.235493
P07335	KCRB_RAT	Creatine kinase B-type OS=Rattus norvegicus GN=Ckb PE=1 SV=2	-0.0916871	0.0114588	0.235493
P26284	ODPA_RAT	Pyruvate dehydrogenase E1 component subunit alpha, somatic form, mitochondrial OS=Rattus norvegicus GN=Pdha1 PE=1 SV=2	0.334973	0.0124495	0.235493
P55068	PGCB_RAT	Brevican core protein OS=Rattus norvegicus GN=Bcan PE=1 SV=2	-0.127695	0.012768	0.235493
P62982	RS27A_RAT	Ubiquitin-40S ribosomal protein S27a OS=Rattus norvegicus GN=Rps27a PE=1 SV=2	-0.277513	0.011918	0.235493
Q9QUH6	SYGP1_RAT	Ras/Rap GTPase-activating protein SynGAP OS=Rattus norvegicus GN=Syngap1 PE=1 SV=2	-0.361171	0.0127944	0.235493
Q8CGV7	THTPA_RAT	Thiamine-triphosphatase OS=Rattus norvegicus GN=Thtpa PE=2 SV=3	0.198241	0.0130172	0.235493
Q7TNJ2	ABCA7_RAT	ATP-binding cassette sub-family A member 7 OS=Rattus norvegicus GN=Abca7 PE=1 SV=1	-0.232427	0.0135171	0.238883
P13635	CERU_RAT	Ceruloplasmin OS=Rattus norvegicus GN=Cp PE=1 SV=3	-0.172861	0.0136848	0.238883
P09117	ALDOC_RAT	Fructose-bisphosphate aldolase C OS=Rattus norvegicus GN=Aldoc PE=1 SV=3	0.105375	0.0143227	0.240191
D3ZML2	BRSK2_RAT	Serine/threonine-protein kinase BRSK2 OS=Rattus norvegicus GN=Brsk2 PE=2 SV=1	-0.161112	0.0146853	0.240191
P23928	CRYAB_RAT	Alpha-crystallin B chain OS=Rattus norvegicus GN=Cryab PE=1 SV=1	-0.477045	0.0149667	0.240191
Q9WVS2	OSGEP_RAT	Probable tRNA threonylcarbamoyladenosine biosynthesis protein Osgep (Fragment) OS=Rattus norvegicus GN=Osgep PE=2 SV=1	-0.429186	0.0149081	0.240191
Q9EPH8	PABP1_RAT	Polyadenylate-binding protein 1 OS=Rattus norvegicus GN=Pabpc1 PE=2 SV=1	0.135574	0.0146329	0.240191
Q9Z339	GSTO1_RAT	Glutathione S-transferase omega-1 OS=Rattus norvegicus GN=Gsto1 PE=1 SV=2	0.102334	0.0153981	0.243193
P23565	AINX_RAT	Alpha-internexin OS=Rattus norvegicus GN=Ina PE=1 SV=2	-0.320287	0.0172383	0.265853
P32232	CBS_RAT	Cystathionine beta-synthase OS=Rattus norvegicus GN=Cbs PE=1 SV=3	0.196509	0.0173673	0.265853
Q68FS2	CSN4_RAT	COP9 signalosome complex subunit 4 OS=Rattus norvegicus GN=Cops4 PE=2 SV=1	0.110962	0.0178043	0.267226
P06866	HPT_RAT	Haptoglobin OS=Rattus norvegicus GN=Hp PE=1 SV=3	-0.433922	0.0179941	0.267226
P19139	CSK21_RAT	Casein kinase II subunit alpha OS=Rattus norvegicus GN=Csnk2a1 PE=1 SV=2	0.139259	0.0192382	0.274005
Q66HA8	HS105_RAT	Heat shock protein 105 kDa OS=Rattus norvegicus GN=Hsph1 PE=2 SV=1	0.0729346	0.0189077	0.274005
P04177	TY3H_RAT	Tyrosine 3-monooxygenase OS=Rattus norvegicus GN=Th PE=1 SV=3	0.117234	0.0192767	0.274005
P11348	DHPR_RAT	Dihydropteridine reductase OS=Rattus norvegicus GN=Qdpr PE=1 SV=1	-0.346077	0.0197852	0.276778
Q9Z244	GMPR1_RAT	GMP reductase 1 OS=Rattus norvegicus GN=Gmpr PE=2 SV=1	-0.134302	0.0200281	0.276778
P14669	ANXA3_RAT	Annexin A3 OS=Rattus norvegicus GN=Anxa3 PE=1 SV=4	-0.111794	0.0212285	0.280622
P63039	CH60_RAT	60 kDa heat shock protein, mitochondrial OS=Rattus norvegicus GN=Hspd1 PE=1 SV=1	0.172399	0.0214344	0.280622
P41562	IDHC_RAT	Isocitrate dehydrogenase [NADP] cytoplasmic OS=Rattus norvegicus GN=Idh1 PE=1 SV=1	-0.121139	0.0210291	0.280622
P35427	RL13A_RAT	60S ribosomal protein L13a OS=Rattus norvegicus GN=Rpl13a PE=1 SV=2	0.130202	0.0206301	0.280622
P46462	TERA_RAT	Transitional endoplasmic reticulum ATPase OS=Rattus norvegicus GN=Vcp PE=1 SV=3	0.115148	0.0220044	0.284343
Q62656	PTPRZ_RAT	Receptor-type tyrosine-protein phosphatase zeta OS=Rattus norvegicus GN=Ptprz1 PE=1 SV=1	-0.116988	0.0232018	0.295972
P85973	PNPH_RAT	Purine nucleoside phosphorylase OS=Rattus norvegicus GN=Pnp PE=1 SV=1	-0.207603	0.0243903	0.299855
Q6NYB7	RAB1A_RAT	Ras-related protein Rab-1A OS=Rattus norvegicus GN=Rab1A PE=1 SV=3	0.209356	0.0242965	0.299855
Q9WVB1	RAB6A_RAT	Ras-related protein Rab-6A OS=Rattus norvegicus GN=Rab6a PE=2 SV=2	-0.074691	0.0244103	0.299855
P62138	PP1A_RAT	Serine/threonine-protein phosphatase PP1-alpha catalytic subunit OS=Rattus norvegicus GN=Ppp1ca PE=1 SV=1	0.0848111	0.0255653	0.310213
Q5RJR2	TWF1_RAT	Twinfilin-1 OS=Rattus norvegicus GN=Twf1 PE=2 SV=1	0.135454	0.0264466	0.31704
P00507	AATM_RAT	Aspartate aminotransferase, mitochondrial OS=Rattus norvegicus GN=Got2 PE=1 SV=2	0.161447	0.0274174	0.32225
Q5XID1	CPIN1_RAT	Anamorsin OS=Rattus norvegicus GN=Ciapin1 PE=2 SV=1	0.220061	0.0287862	0.32225
P47942	DPYL2_RAT	Dihydropyrimidinase-related protein 2 OS=Rattus norvegicus GN=Dpysl2 PE=1 SV=1	0.0796275	0.0288931	0.32225
P85834	EFTU_RAT	Elongation factor Tu, mitochondrial OS=Rattus norvegicus GN=Tufm PE=1 SV=1	0.18623	0.028757	0.32225
Q9WVK7	HCDH_RAT	Hydroxyacyl-coenzyme A dehydrogenase, mitochondrial OS=Rattus norvegicus GN=Hadh PE=2 SV=1	0.448477	0.0291482	0.32225
Q5U1Z0	RBGPR_RAT	Rab3 GTPase-activating protein non-catalytic subunit OS=Rattus norvegicus GN=Rab3gap2 PE=1 SV=2	-0.15305	0.0283702	0.32225
P10960	SAP_RAT	Sulfated glycoprotein 1 OS=Rattus norvegicus GN=Psap PE=1 SV=1	-0.440611	0.0289374	0.32225
P14604	ECHM_RAT	Enoyl-CoA hydratase, mitochondrial OS=Rattus norvegicus GN=Echs1 PE=1 SV=1	0.184835	0.0299694	0.324125
Q00981	UCHL1_RAT	Ubiquitin carboxyl-terminal hydrolase isozyme L1 OS=Rattus norvegicus GN=Uchl1 PE=1 SV=2	-0.0639118	0.0297994	0.324125
P68255	1433T_RAT	14-3-3 protein theta OS=Rattus norvegicus GN=Ywhaq PE=1 SV=1	0.0521252	0.0320683	0.338859
P11980	KPYM_RAT	Pyruvate kinase PKM OS=Rattus norvegicus GN=Pkm PE=1 SV=3	-0.0807177	0.0319273	0.338859
O55012	PICAL_RAT	Phosphatidylinositol-binding clathrin assembly protein OS=Rattus norvegicus GN=Picalm PE=1 SV=1	0.201777	0.0323534	0.338859
P62870	ELOB_RAT	Transcription elongation factor B polypeptide 2 OS=Rattus norvegicus GN=Tceb2 PE=1 SV=1	-0.103488	0.0335342	0.340475
Q923V4	FBX6_RAT	F-box only protein 6 OS=Rattus norvegicus GN=Fbxo6 PE=2 SV=1	-0.200331	0.0332108	0.340475
P04905	GSTM1_RAT	Glutathione S-transferase Mu 1 OS=Rattus norvegicus GN=Gstm1 PE=1 SV=2	-0.0977657	0.0331993	0.340475
P55067	NCAN_RAT	Neurocan core protein OS=Rattus norvegicus GN=Ncan PE=1 SV=1	-0.129654	0.0339158	0.340871
P63029	TCTP_RAT	Translationally-controlled tumor protein OS=Rattus norvegicus GN=Tpt1 PE=1 SV=1	-0.19659	0.0344417	0.342695
Q63639	AL1A2_RAT	Retinal dehydrogenase 2 OS=Rattus norvegicus GN=Aldh1a2 PE=1 SV=2	0.144091	0.0369056	0.356515
Q64559	BACH_RAT	Cytosolic acyl coenzyme A thioester hydrolase OS=Rattus norvegicus GN=Acot7 PE=1 SV=4	-0.0680371	0.0363587	0.356515
P97526	NF1_RAT	Neurofibromin OS=Rattus norvegicus GN=Nf1 PE=1 SV=1	0.231006	0.0368308	0.356515
Q8K4F7	DCPS_RAT	m7GpppX diphosphatase OS=Rattus norvegicus GN=Dcps PE=2 SV=1	0.252415	0.0381142	0.364651
Q62812	MYH9_RAT	Myosin-9 OS=Rattus norvegicus GN=Myh9 PE=1 SV=3	0.132366	0.0403389	0.382259
P04639	APOA1_RAT	Apolipoprotein A-I OS=Rattus norvegicus GN=Apoa1 PE=1 SV=2	0.48602	0.0412478	0.383566
P26772	CH10_RAT	10 kDa heat shock protein, mitochondrial OS=Rattus norvegicus GN=Hspe1 PE=1 SV=3	0.22517	0.040887	0.383566
P13221	AATC_RAT	Aspartate aminotransferase, cytoplasmic OS=Rattus norvegicus GN=Got1 PE=1 SV=3	0.0789195	0.042381	0.386872
P18418	CALR_RAT	Calreticulin OS=Rattus norvegicus GN=Calr PE=1 SV=1	-0.127638	0.0421834	0.386872
Q9ER34	ACON_RAT	Aconitate hydratase, mitochondrial OS=Rattus norvegicus GN=Aco2 PE=1 SV=2	0.169081	0.044728	0.393223
P02770	ALBU_RAT	Serum albumin OS=Rattus norvegicus GN=Alb PE=1 SV=2	-0.275902	0.0446321	0.393223
P97536	CAND1_RAT	Cullin-associated NEDD8-dissociated protein 1 OS=Rattus norvegicus GN=Cand1 PE=1 SV=1	0.0553056	0.0443606	0.393223
P25809	KCRU_RAT	Creatine kinase U-type, mitochondrial OS=Rattus norvegicus GN=Ckmt1 PE=1 SV=1	-0.19758	0.0450527	0.393223
P13086	SUCA_RAT	Succinyl-CoA ligase [ADP/GDP-forming] subunit alpha, mitochondrial OS=Rattus norvegicus GN=Suclg1 PE=2 SV=2	0.265182	0.0442346	0.393223
P61765	STXB1_RAT	Syntaxin-binding protein 1 OS=Rattus norvegicus GN=Stxbp1 PE=1 SV=1	0.106494	0.0459878	0.397895
O08839	BIN1_RAT	Myc box-dependent-interacting protein 1 OS=Rattus norvegicus GN=Bin1 PE=1 SV=1	0.106195	0.0489202	0.408291
Q566Q8	CK068_RAT	UPF0696 protein C11orf68 homolog OS=Rattus norvegicus GN=Bles03 PE=1 SV=1	-0.143389	0.0506099	0.408291
O35952	GLO2_RAT	Hydroxyacylglutathione hydrolase, mitochondrial OS=Rattus norvegicus GN=Hagh PE=1 SV=2	-0.228523	0.0512117	0.408291
P41498	PPAC_RAT	Low molecular weight phosphotyrosine protein phosphatase OS=Rattus norvegicus GN=Acp1 PE=1 SV=3	-0.136363	0.0508129	0.408291
P62824	RAB3C_RAT	Ras-related protein Rab-3C OS=Rattus norvegicus GN=Rab3c PE=1 SV=1	0.218392	0.0512929	0.408291
Q8CFD1	RBM45_RAT	RNA-binding protein 45 OS=Rattus norvegicus GN=Rbm45 PE=2 SV=1	-0.221873	0.0495537	0.408291
P60192	SNAPN_RAT	SNARE-associated protein Snapin OS=Rattus norvegicus GN=Snapin PE=1 SV=1	-0.224276	0.0477956	0.408291
P60881	SNP25_RAT	Synaptosomal-associated protein 25 OS=Rattus norvegicus GN=Snap25 PE=1 SV=1	-0.129584	0.0497083	0.408291
Q6PDU1	SRSF2_RAT	Serine/arginine-rich splicing factor 2 OS=Rattus norvegicus GN=Srsf2 PE=1 SV=3	-0.187872	0.0490099	0.408291
O88506	STK39_RAT	STE20/SPS1-related proline-alanine-rich protein kinase OS=Rattus norvegicus GN=Stk39 PE=2 SV=2	-0.138087	0.0500437	0.408291
P61751	ARF4_RAT	ADP-ribosylation factor 4 OS=Rattus norvegicus GN=Arf4 PE=2 SV=2	0.146714	0.0519061	0.409893
Q78ZR5	HOP_RAT	Homeodomain-only protein OS=Rattus norvegicus GN=Hopx PE=3 SV=1	0.308376	0.052727	0.413098
Q32Q06	AP1M1_RAT	AP-1 complex subunit mu-1 OS=Rattus norvegicus GN=Ap1m1 PE=1 SV=3	-0.162993	0.054938	0.416034
Q4V7C7	ARP3_RAT	Actin-related protein 3 OS=Rattus norvegicus GN=Actr3 PE=1 SV=1	0.110492	0.0549961	0.416034
Q9ESM2	HPLN2_RAT	Hyaluronan and proteoglycan link protein 2 OS=Rattus norvegicus GN=Hapln2 PE=2 SV=1	-0.237498	0.0554747	0.416034
P49186	MK09_RAT	Mitogen-activated protein kinase 9 OS=Rattus norvegicus GN=Mapk9 PE=1 SV=1	-0.13634	0.0557858	0.416034
P10686	PLCG1_RAT	1-phosphatidylinositol 4,5-bisphosphate phosphodiesterase gamma-1 OS=Rattus norvegicus GN=Plcg1 PE=1 SV=1	0.264039	0.0538661	0.416034
P04631	S100B_RAT	Protein S100-B OS=Rattus norvegicus GN=S100b PE=1 SV=2	-0.144376	0.0560287	0.416034
P05964	S10A6_RAT	Protein S100-A6 OS=Rattus norvegicus GN=S100a6 PE=1 SV=3	-0.157983	0.0558082	0.416034
P36876	2ABA_RAT	Serine/threonine-protein phosphatase 2A 55 kDa regulatory subunit B alpha isoform OS=Rattus norvegicus GN=Ppp2r2a PE=2 SV=1	-0.163635	0.058431	0.418929
P01041	CYTB_RAT	Cystatin-B OS=Rattus norvegicus GN=Cstb PE=1 SV=1	-0.225428	0.0584598	0.418929
Q6P7A9	LYAG_RAT	Lysosomal alpha-glucosidase OS=Rattus norvegicus GN=Gaa PE=2 SV=1	0.213971	0.0585238	0.418929
Q923S8	PANK4_RAT	Pantothenate kinase 4 OS=Rattus norvegicus GN=Pank4 PE=1 SV=1	-0.184575	0.0575655	0.418929
Q5U2Y0	WIPI4_RAT	WD repeat domain phosphoinositide-interacting protein 4 OS=Rattus norvegicus GN=Wdr45 PE=2 SV=1	-0.202348	0.0574804	0.418929
Q9JK15	ADAP2_RAT	Arf-GAP with dual PH domain-containing protein 2 OS=Rattus norvegicus GN=Adap2 PE=1 SV=1	-0.260052	0.0598061	0.419064
P04904	GSTA3_RAT	Glutathione S-transferase alpha-3 OS=Rattus norvegicus GN=Gsta3 PE=1 SV=3	0.182923	0.0589988	0.419064
P63004	LIS1_RAT	Platelet-activating factor acetylhydrolase IB subunit alpha OS=Rattus norvegicus GN=Pafah1b1 PE=1 SV=2	-0.0766176	0.0594152	0.419064
Q8VD52	PLPP_RAT	Pyridoxal phosphate phosphatase OS=Rattus norvegicus GN=Pdxp PE=1 SV=2	-0.230312	0.0607057	0.41946
P17074	RS19_RAT	40S ribosomal protein S19 OS=Rattus norvegicus GN=Rps19 PE=2 SV=3	-0.207782	0.0602883	0.41946
Q6PEC0	AP4A_RAT	Bis(5'-nucleosyl)-tetraphosphatase [asymmetrical] OS=Rattus norvegicus GN=Nudt2 PE=2 SV=3	0.124145	0.0615259	0.419639
Q63692	CDC37_RAT	Hsp90 co-chaperone Cdc37 OS=Rattus norvegicus GN=Cdc37 PE=1 SV=2	0.0785937	0.0637402	0.419639
P50554	GABT_RAT	4-aminobutyrate aminotransferase, mitochondrial OS=Rattus norvegicus GN=Abat PE=1 SV=3	0.180424	0.0650262	0.419639
P35559	IDE_RAT	Insulin-degrading enzyme OS=Rattus norvegicus GN=Ide PE=1 SV=1	0.127334	0.0654709	0.419639
D3ZW55	ITPA_RAT	Inosine triphosphate pyrophosphatase OS=Rattus norvegicus GN=Itpa PE=3 SV=1	-0.217512	0.0627328	0.419639
P11730	KCC2G_RAT	Calcium/calmodulin-dependent protein kinase type II subunit gamma OS=Rattus norvegicus GN=Camk2g PE=2 SV=1	-0.138951	0.0650009	0.419639
P13234	KCC4_RAT	Calcium/calmodulin-dependent protein kinase type IV OS=Rattus norvegicus GN=Camk4 PE=1 SV=3	0.134752	0.0621713	0.419639
Q5XIT1	MARE3_RAT	Microtubule-associated protein RP/EB family member 3 OS=Rattus norvegicus GN=Mapre3 PE=1 SV=1	-0.0928016	0.0654434	0.419639
P04636	MDHM_RAT	Malate dehydrogenase, mitochondrial OS=Rattus norvegicus GN=Mdh2 PE=1 SV=2	0.177197	0.0618115	0.419639
Q62881	NOL3_RAT	Nucleolar protein 3 OS=Rattus norvegicus GN=Nol3 PE=1 SV=1	0.301709	0.0652147	0.419639
Q64303	PAK2_RAT	Serine/threonine-protein kinase PAK 2 OS=Rattus norvegicus GN=Pak2 PE=1 SV=1	-0.116953	0.0629538	0.419639
O35244	PRDX6_RAT	Peroxiredoxin-6 OS=Rattus norvegicus GN=Prdx6 PE=1 SV=3	0.109862	0.0658952	0.419639
Q6AY84	SCRN1_RAT	Secernin-1 OS=Rattus norvegicus GN=Scrn1 PE=1 SV=1	0.0802847	0.0662145	0.419639
P62944	AP2B1_RAT	AP-2 complex subunit beta OS=Rattus norvegicus GN=Ap2b1 PE=1 SV=1	0.0953957	0.0680015	0.422884
Q4V8B0	OXR1_RAT	Oxidation resistance protein 1 OS=Rattus norvegicus GN=Oxr1 PE=2 SV=3	-0.143689	0.0677224	0.422884
P09006	SPA3N_RAT	Serine protease inhibitor A3N OS=Rattus norvegicus GN=Serpina3n PE=1 SV=3	-0.215695	0.0671773	0.422884
Q5M7A7	CNRP1_RAT	CB1 cannabinoid receptor-interacting protein 1 OS=Rattus norvegicus GN=Cnrip1 PE=1 SV=1	-0.121627	0.0721417	0.424435
P13264	GLSK_RAT	Glutaminase kidney isoform, mitochondrial OS=Rattus norvegicus GN=Gls PE=1 SV=2	0.229637	0.0704192	0.424435
P21139	MA2C1_RAT	Alpha-mannosidase 2C1 OS=Rattus norvegicus GN=Man2c1 PE=1 SV=1	0.243964	0.0695342	0.424435
P13697	MAOX_RAT	NADP-dependent malic enzyme OS=Rattus norvegicus GN=Me1 PE=1 SV=2	0.0775585	0.0724931	0.424435
P02688	MBP_RAT	Myelin basic protein OS=Rattus norvegicus GN=Mbp PE=1 SV=3	0.239342	0.0706567	0.424435
Q6DGG0	PPID_RAT	Peptidyl-prolyl cis-trans isomerase D OS=Rattus norvegicus GN=Ppid PE=1 SV=3	0.0937566	0.0715324	0.424435
P29315	RINI_RAT	Ribonuclease inhibitor OS=Rattus norvegicus GN=Rnh1 PE=1 SV=2	-0.152862	0.0693378	0.424435
P83868	TEBP_RAT	Prostaglandin E synthase 3 OS=Rattus norvegicus GN=Ptges3 PE=1 SV=2	-0.223886	0.0692317	0.424435
Q6PCT3	TPD54_RAT	Tumor protein D54 OS=Rattus norvegicus GN=Tpd52l2 PE=2 SV=1	-0.170865	0.0722105	0.424435
Q9ERH3	WDR7_RAT	WD repeat-containing protein 7 OS=Rattus norvegicus GN=Wdr7 PE=2 SV=1	-0.181455	0.0725166	0.424435
P20595	GCYB1_RAT	Guanylate cyclase soluble subunit beta-1 OS=Rattus norvegicus GN=Gucy1b3 PE=1 SV=2	-0.137844	0.0742014	0.43039
Q8K4M9	OSBL1_RAT	Oxysterol-binding protein-related protein 1 OS=Rattus norvegicus GN=Osbpl1a PE=1 SV=1	0.104607	0.0743991	0.43039
P20717	PADI2_RAT	Protein-arginine deiminase type-2 OS=Rattus norvegicus GN=Padi2 PE=1 SV=1	0.206066	0.076678	0.441009
P12785	FAS_RAT	Fatty acid synthase OS=Rattus norvegicus GN=Fasn PE=1 SV=3	-0.057951	0.0771715	0.441297
Q9JK11	RTN4_RAT	Reticulon-4 OS=Rattus norvegicus GN=Rtn4 PE=1 SV=1	0.430509	0.0780329	0.443673
Q9JHZ4	GRAP1_RAT	GRIP1-associated protein 1 OS=Rattus norvegicus GN=Gripap1 PE=1 SV=1	-0.10715	0.0792224	0.445346
Q07205	IF5_RAT	Eukaryotic translation initiation factor 5 OS=Rattus norvegicus GN=Eif5 PE=1 SV=1	-0.118327	0.078917	0.445346
P11275	KCC2A_RAT	Calcium/calmodulin-dependent protein kinase type II subunit alpha OS=Rattus norvegicus GN=Camk2a PE=1 SV=1	-0.28581	0.0798065	0.446109
Q68FS4	AMPL_RAT	Cytosol aminopeptidase OS=Rattus norvegicus GN=Lap3 PE=1 SV=1	0.0732165	0.0834196	0.44624
Q66HA6	ARL8B_RAT	ADP-ribosylation factor-like protein 8B OS=Rattus norvegicus GN=Arl8b PE=2 SV=1	0.226524	0.083595	0.44624
P30835	K6PL_RAT	6-phosphofructokinase, liver type OS=Rattus norvegicus GN=Pfkl PE=2 SV=3	-0.119936	0.0830847	0.44624
P01048	KNT1_RAT	T-kininogen 1 OS=Rattus norvegicus GN=Map1 PE=1 SV=2	-0.390932	0.0820568	0.44624
Q02253	MMSA_RAT	Methylmalonate-semialdehyde dehydrogenase [acylating], mitochondrial OS=Rattus norvegicus GN=Aldh6a1 PE=1 SV=1	0.121424	0.0838663	0.44624
P45479	PPT1_RAT	Palmitoyl-protein thioesterase 1 OS=Rattus norvegicus GN=Ppt1 PE=1 SV=1	0.182476	0.0812657	0.44624
P09811	PYGL_RAT	Glycogen phosphorylase, liver form OS=Rattus norvegicus GN=Pygl PE=1 SV=5	-0.301784	0.0836219	0.44624
Q63941	RAB3B_RAT	Ras-related protein Rab-3B OS=Rattus norvegicus GN=Rab3b PE=1 SV=2	0.0980553	0.082701	0.44624
Q6PEC1	TBCA_RAT	Tubulin-specific chaperone A OS=Rattus norvegicus GN=Tbca PE=1 SV=1	-0.0806849	0.0822492	0.44624
P13437	THIM_RAT	3-ketoacyl-CoA thiolase, mitochondrial OS=Rattus norvegicus GN=Acaa2 PE=2 SV=1	0.160431	0.0844357	0.44688
P10111	PPIA_RAT	Peptidyl-prolyl cis-trans isomerase A OS=Rattus norvegicus GN=Ppia PE=1 SV=2	-0.0695671	0.0855857	0.45057
P49911	AN32A_RAT	Acidic leucine-rich nuclear phosphoprotein 32 family member A OS=Rattus norvegicus GN=Anp32a PE=2 SV=1	0.0874179	0.0875888	0.45236
P97685	NFASC_RAT	Neurofascin OS=Rattus norvegicus GN=Nfasc PE=1 SV=2	-0.209181	0.0877186	0.45236
Q63598	PLST_RAT	Plastin-3 OS=Rattus norvegicus GN=Pls3 PE=2 SV=2	-0.0952872	0.0877442	0.45236
P02625	PRVA_RAT	Parvalbumin alpha OS=Rattus norvegicus GN=Pvalb PE=1 SV=2	0.187933	0.0869576	0.45236
O09178	AMPD3_RAT	AMP deaminase 3 OS=Rattus norvegicus GN=Ampd3 PE=2 SV=2	0.363828	0.0882203	0.45247
Q5M821	PPM1H_RAT	Protein phosphatase 1H OS=Rattus norvegicus GN=Ppm1h PE=2 SV=2	0.0785354	0.0891341	0.454813
Q8CFN2	CDC42_RAT	Cell division control protein 42 homolog OS=Rattus norvegicus GN=Cdc42 PE=1 SV=2	0.0907056	0.0905884	0.45779
Q62950	DPYL1_RAT	Dihydropyrimidinase-related protein 1 OS=Rattus norvegicus GN=Crmp1 PE=1 SV=1	0.100291	0.0907001	0.45779
Q5PPG6	NP1L5_RAT	Nucleosome assembly protein 1-like 5 OS=Rattus norvegicus GN=Nap1l5 PE=2 SV=1	-0.144663	0.0910979	0.45779
Q4V882	EPN3_RAT	Epsin-3 OS=Rattus norvegicus GN=Epn3 PE=2 SV=1	0.233294	0.0924483	0.462241
P21807	PERI_RAT	Peripherin OS=Rattus norvegicus GN=Prph PE=1 SV=1	-0.276556	0.0930571	0.462959
Q5XIG8	STRAP_RAT	Serine-threonine kinase receptor-associated protein OS=Rattus norvegicus GN=Strap PE=1 SV=1	-0.068185	0.093549	0.463091
P05696	KPCA_RAT	Protein kinase C alpha type OS=Rattus norvegicus GN=Prkca PE=1 SV=3	-0.203657	0.0948898	0.4651
D3ZXK7	RN123_RAT	E3 ubiquitin-protein ligase RNF123 OS=Rattus norvegicus GN=Rnf123 PE=1 SV=1	0.220069	0.0946016	0.4651
Q63416	ITIH3_RAT	Inter-alpha-trypsin inhibitor heavy chain H3 OS=Rattus norvegicus GN=Itih3 PE=2 SV=1	-0.194821	0.0959355	0.467921
Q6MG61	CLIC1_RAT	Chloride intracellular channel protein 1 OS=Rattus norvegicus GN=Clic1 PE=1 SV=1	-0.119617	0.0982274	0.476762
Q9R1T5	ACY2_RAT	Aspartoacylase OS=Rattus norvegicus GN=Aspa PE=1 SV=2	-0.20224	0.101013	0.483464
P47728	CALB2_RAT	Calretinin OS=Rattus norvegicus GN=Calb2 PE=1 SV=1	0.124723	0.101066	0.483464
Q9WVE9	ITSN1_RAT	Intersectin-1 OS=Rattus norvegicus GN=Itsn1 PE=1 SV=1	-0.165456	0.100103	0.483464
P51635	AK1A1_RAT	Alcohol dehydrogenase [NADP(+)] OS=Rattus norvegicus GN=Akr1a1 PE=1 SV=2	0.0474287	0.102573	0.483674
P04764	ENOA_RAT	Alpha-enolase OS=Rattus norvegicus GN=Eno1 PE=1 SV=4	-0.126897	0.103054	0.483674
Q5I0D1	GLOD4_RAT	Glyoxalase domain-containing protein 4 OS=Rattus norvegicus GN=Glod4 PE=1 SV=1	0.102841	0.101905	0.483674
P10760	SAHH_RAT	Adenosylhomocysteinase OS=Rattus norvegicus GN=Ahcy PE=1 SV=3	-0.107894	0.102728	0.483674
Q5QD51	AKA12_RAT	A-kinase anchor protein 12 OS=Rattus norvegicus GN=Akap12 PE=1 SV=1	0.0937001	0.104898	0.490015
P84076	HPCA_RAT	Neuron-specific calcium-binding protein hippocalcin OS=Rattus norvegicus GN=Hpca PE=1 SV=2	-0.214457	0.105496	0.490508
Q4V8K5	BROX_RAT	BRO1 domain-containing protein BROX OS=Rattus norvegicus GN=Brox PE=2 SV=1	0.160562	0.107954	0.4996
P56571	ES1_RAT	ES1 protein homolog, mitochondrial OS=Rattus norvegicus PE=1 SV=2	0.213818	0.110632	0.502642
Q04631	FNTA_RAT	Protein farnesyltransferase/geranylgeranyltransferase type-1 subunit alpha OS=Rattus norvegicus GN=Fnta PE=1 SV=1	-0.10381	0.109564	0.502642
P61972	NTF2_RAT	Nuclear transport factor 2 OS=Rattus norvegicus GN=Nutf2 PE=1 SV=1	0.115618	0.110499	0.502642
P62083	RS7_RAT	40S ribosomal protein S7 OS=Rattus norvegicus GN=Rps7 PE=1 SV=1	-0.197084	0.109959	0.502642
P12346	TRFE_RAT	Serotransferrin OS=Rattus norvegicus GN=Tf PE=1 SV=3	-0.184348	0.113423	0.512983
Q66X93	SND1_RAT	Staphylococcal nuclease domain-containing protein 1 OS=Rattus norvegicus GN=Snd1 PE=2 SV=1	-0.175244	0.114067	0.51356
P28480	TCPA_RAT	T-complex protein 1 subunit alpha OS=Rattus norvegicus GN=Tcp1 PE=1 SV=1	0.0899207	0.115221	0.516418
P13676	ACPH_RAT	Acylamino-acid-releasing enzyme OS=Rattus norvegicus GN=Apeh PE=1 SV=1	0.0879533	0.116805	0.521018
P08413	KCC2B_RAT	Calcium/calmodulin-dependent protein kinase type II subunit beta OS=Rattus norvegicus GN=Camk2b PE=1 SV=1	-0.245228	0.117295	0.521018
P01015	ANGT_RAT	Angiotensinogen OS=Rattus norvegicus GN=Agt PE=1 SV=1	0.179111	0.119471	0.521376
P50398	GDIA_RAT	Rab GDP dissociation inhibitor alpha OS=Rattus norvegicus GN=Gdi1 PE=1 SV=1	-0.118649	0.119185	0.521376
Q63228	GMFB_RAT	Glia maturation factor beta OS=Rattus norvegicus GN=Gmfb PE=1 SV=2	0.0628693	0.119037	0.521376
F1LMZ8	PSD11_RAT	26S proteasome non-ATPase regulatory subunit 11 OS=Rattus norvegicus GN=Psmd11 PE=2 SV=2	0.112157	0.119104	0.521376
Q6AXQ0	SAE1_RAT	SUMO-activating enzyme subunit 1 OS=Rattus norvegicus GN=Sae1 PE=2 SV=1	0.0881124	0.120996	0.525726
O54783	CHKB_RAT	Choline/ethanolamine kinase OS=Rattus norvegicus GN=Chkb PE=1 SV=3	-0.141539	0.123259	0.532863
B2RYW9	FAHD2_RAT	Fumarylacetoacetate hydrolase domain-containing protein 2 OS=Rattus norvegicus GN=Fahd2 PE=1 SV=1	0.152302	0.12371	0.532863
Q5PPJ9	SHLB2_RAT	Endophilin-B2 OS=Rattus norvegicus GN=Sh3glb2 PE=2 SV=2	0.0797815	0.124692	0.534778
P68511	1433F_RAT	14-3-3 protein eta OS=Rattus norvegicus GN=Ywhah PE=1 SV=2	0.0804428	0.12743	0.543939
P29266	3HIDH_RAT	3-hydroxyisobutyrate dehydrogenase, mitochondrial OS=Rattus norvegicus GN=Hibadh PE=1 SV=3	0.0866635	0.127921	0.543939
Q99NA5	IDH3A_RAT	Isocitrate dehydrogenase [NAD] subunit alpha, mitochondrial OS=Rattus norvegicus GN=Idh3a PE=1 SV=1	0.152348	0.12965	0.548874
P13596	NCAM1_RAT	Neural cell adhesion molecule 1 OS=Rattus norvegicus GN=Ncam1 PE=1 SV=1	-0.14161	0.130185	0.548874
P09456	KAP0_RAT	cAMP-dependent protein kinase type I-alpha regulatory subunit OS=Rattus norvegicus GN=Prkar1a PE=2 SV=2	0.120681	0.132431	0.555985
O09175	AMPB_RAT	Aminopeptidase B OS=Rattus norvegicus GN=Rnpep PE=1 SV=2	-0.0848126	0.135597	0.560343
P25093	FAAA_RAT	Fumarylacetoacetase OS=Rattus norvegicus GN=Fah PE=1 SV=1	0.159136	0.135492	0.560343
P63159	HMGB1_RAT	High mobility group protein B1 OS=Rattus norvegicus GN=Hmgb1 PE=1 SV=2	0.639479	0.135721	0.560343
Q9Z1A5	ULA1_RAT	NEDD8-activating enzyme E1 regulatory subunit OS=Rattus norvegicus GN=Nae1 PE=1 SV=1	-0.0552194	0.134675	0.560343
P86172	NMRL1_RAT	NmrA-like family domain-containing protein 1 (Fragments) OS=Rattus norvegicus GN=Nmral1 PE=1 SV=1	-0.0675514	0.136367	0.560684
Q66H62	CYLD_RAT	Ubiquitin carboxyl-terminal hydrolase CYLD OS=Rattus norvegicus GN=Cyld PE=2 SV=1	-0.129093	0.141103	0.566649
Q5RK09	EIF3G_RAT	Eukaryotic translation initiation factor 3 subunit G OS=Rattus norvegicus GN=Eif3g PE=2 SV=1	0.113465	0.140447	0.566649
O35095	NCDN_RAT	Neurochondrin OS=Rattus norvegicus GN=Ncdn PE=1 SV=2	-0.11268	0.141875	0.566649
P13383	NUCL_RAT	Nucleolin OS=Rattus norvegicus GN=Ncl PE=1 SV=3	0.0861916	0.140577	0.566649
P54319	PLAP_RAT	Phospholipase A-2-activating protein OS=Rattus norvegicus GN=Plaa PE=2 SV=3	-0.218798	0.139514	0.566649
O70593	SGTA_RAT	Small glutamine-rich tetratricopeptide repeat-containing protein alpha OS=Rattus norvegicus GN=Sgta PE=1 SV=1	0.0432971	0.140757	0.566649
Q3KRD5	TOM34_RAT	Mitochondrial import receptor subunit TOM34 OS=Rattus norvegicus GN=Tomm34 PE=1 SV=1	0.128224	0.142141	0.566649
P04276	VTDB_RAT	Vitamin D-binding protein OS=Rattus norvegicus GN=Gc PE=1 SV=3	-0.101147	0.142374	0.566649
Q9Z1B2	GSTM5_RAT	Glutathione S-transferase Mu 5 OS=Rattus norvegicus GN=Gstm5 PE=1 SV=3	-0.0668495	0.145801	0.572288
P57113	MAAI_RAT	Maleylacetoacetate isomerase OS=Rattus norvegicus GN=Gstz1 PE=1 SV=2	0.0793134	0.145718	0.572288
P60123	RUVB1_RAT	RuvB-like 1 OS=Rattus norvegicus GN=Ruvbl1 PE=1 SV=1	0.154883	0.146092	0.572288
P85972	VINC_RAT	Vinculin OS=Rattus norvegicus GN=Vcl PE=1 SV=1	0.133529	0.145226	0.572288
P14668	ANXA5_RAT	Annexin A5 OS=Rattus norvegicus GN=Anxa5 PE=1 SV=3	-0.09292	0.148449	0.576979
O88339	EPN1_RAT	Epsin-1 OS=Rattus norvegicus GN=Epn1 PE=1 SV=1	0.0902618	0.148383	0.576979
O35077	GPDA_RAT	Glycerol-3-phosphate dehydrogenase [NAD(+)], cytoplasmic OS=Rattus norvegicus GN=Gpd1 PE=1 SV=4	-0.0766034	0.150645	0.578248
Q6I7R3	ISOC1_RAT	Isochorismatase domain-containing protein 1 OS=Rattus norvegicus GN=Isoc1 PE=2 SV=1	0.168361	0.152843	0.578248
D3ZHV2	MACF1_RAT	Microtubule-actin cross-linking factor 1 OS=Rattus norvegicus GN=Macf1 PE=1 SV=1	-0.0956329	0.15122	0.578248
P19103	PPR1A_RAT	Protein phosphatase 1 regulatory subunit 1A OS=Rattus norvegicus GN=Ppp1r1a PE=2 SV=1	0.0933952	0.150248	0.578248
P62909	RS3_RAT	40S ribosomal protein S3 OS=Rattus norvegicus GN=Rps3 PE=1 SV=1	-0.0949624	0.152736	0.578248
P97532	THTM_RAT	3-mercaptopyruvate sulfurtransferase OS=Rattus norvegicus GN=Mpst PE=1 SV=3	-0.127341	0.152564	0.578248
P50137	TKT_RAT	Transketolase OS=Rattus norvegicus GN=Tkt PE=1 SV=1	-0.0722558	0.152414	0.578248
Q9QX69	LANC1_RAT	LanC-like protein 1 OS=Rattus norvegicus GN=Lancl1 PE=2 SV=2	-0.134103	0.154833	0.581213
Q9EPC6	PROF2_RAT	Profilin-2 OS=Rattus norvegicus GN=Pfn2 PE=1 SV=3	0.0806351	0.15538	0.581213
Q6P7B0	SYWC_RAT	Tryptophan--tRNA ligase, cytoplasmic OS=Rattus norvegicus GN=Wars PE=1 SV=2	0.162814	0.154607	0.581213
P85845	FSCN1_RAT	Fascin OS=Rattus norvegicus GN=Fscn1 PE=1 SV=2	-0.0863184	0.156882	0.582455
O35964	SH3G1_RAT	Endophilin-A2 OS=Rattus norvegicus GN=Sh3gl1 PE=1 SV=1	-0.112976	0.156804	0.582455
Q9R064	GORS2_RAT	Golgi reassembly-stacking protein 2 OS=Rattus norvegicus GN=Gorasp2 PE=1 SV=3	-0.0992858	0.160355	0.590938
Q5RJQ4	SIR2_RAT	NAD-dependent protein deacetylase sirtuin-2 OS=Rattus norvegicus GN=Sirt2 PE=1 SV=1	-0.0644783	0.159892	0.590938
P05065	ALDOA_RAT	Fructose-bisphosphate aldolase A OS=Rattus norvegicus GN=Aldoa PE=1 SV=2	0.107189	0.166574	0.591712
P84083	ARF5_RAT	ADP-ribosylation factor 5 OS=Rattus norvegicus GN=Arf5 PE=1 SV=2	0.0736488	0.168447	0.591712
O35832	CKD18_RAT	Cyclin-dependent kinase 18 OS=Rattus norvegicus GN=Cdk18 PE=1 SV=1	-0.189825	0.168268	0.591712
Q6Q0N1	CNDP2_RAT	Cytosolic non-specific dipeptidase OS=Rattus norvegicus GN=Cndp2 PE=1 SV=1	-0.0526669	0.168938	0.591712
P23514	COPB_RAT	Coatomer subunit beta OS=Rattus norvegicus GN=Copb1 PE=1 SV=1	-0.0731673	0.164053	0.591712
Q6AYK8	EIF3D_RAT	Eukaryotic translation initiation factor 3 subunit D OS=Rattus norvegicus GN=Eif3d PE=2 SV=1	0.170861	0.169485	0.591712
Q68FP1	GELS_RAT	Gelsolin OS=Rattus norvegicus GN=Gsn PE=1 SV=1	0.102111	0.168084	0.591712
P48721	GRP75_RAT	Stress-70 protein, mitochondrial OS=Rattus norvegicus GN=Hspa9 PE=1 SV=3	0.123471	0.168811	0.591712
P04906	GSTP1_RAT	Glutathione S-transferase P OS=Rattus norvegicus GN=Gstp1 PE=1 SV=2	0.0792269	0.166687	0.591712
P27605	HPRT_RAT	Hypoxanthine-guanine phosphoribosyltransferase OS=Rattus norvegicus GN=Hprt1 PE=1 SV=1	0.0509182	0.162465	0.591712
Q9JLT0	MYH10_RAT	Myosin-10 OS=Rattus norvegicus GN=Myh10 PE=2 SV=1	0.0601442	0.16353	0.591712
P35465	PAK1_RAT	Serine/threonine-protein kinase PAK 1 OS=Rattus norvegicus GN=Pak1 PE=1 SV=3	0.0634585	0.168924	0.591712
P21670	PSA4_RAT	Proteasome subunit alpha type-4 OS=Rattus norvegicus GN=Psma4 PE=1 SV=1	0.098313	0.167646	0.591712
Q63544	SYUG_RAT	Gamma-synuclein OS=Rattus norvegicus GN=Sncg PE=1 SV=2	-0.1764	0.167003	0.591712
P09495	TPM4_RAT	Tropomyosin alpha-4 chain OS=Rattus norvegicus GN=Tpm4 PE=1 SV=3	-0.105091	0.167285	0.591712
Q5XIF6	TBA4A_RAT	Tubulin alpha-4A chain OS=Rattus norvegicus GN=Tuba4a PE=2 SV=1	-0.0710957	0.170352	0.592658
Q63570	PRS6B_RAT	26S protease regulatory subunit 6B OS=Rattus norvegicus GN=Psmc4 PE=1 SV=1	0.0787627	0.172057	0.596505
P04797	G3P_RAT	Glyceraldehyde-3-phosphate dehydrogenase OS=Rattus norvegicus GN=Gapdh PE=1 SV=3	0.0578872	0.172765	0.596878
O08838	AMPH_RAT	Amphiphysin OS=Rattus norvegicus GN=Amph PE=1 SV=1	0.0618365	0.176633	0.60153
P07171	CALB1_RAT	Calbindin OS=Rattus norvegicus GN=Calb1 PE=1 SV=2	0.0782196	0.178343	0.60153
P52481	CAP2_RAT	Adenylyl cyclase-associated protein 2 OS=Rattus norvegicus GN=Cap2 PE=2 SV=1	0.0594394	0.178175	0.60153
Q63198	CNTN1_RAT	Contactin-1 OS=Rattus norvegicus GN=Cntn1 PE=1 SV=2	-0.0740544	0.176627	0.60153
P55051	FABP7_RAT	Fatty acid-binding protein, brain OS=Rattus norvegicus GN=Fabp7 PE=1 SV=2	0.124044	0.175356	0.60153
Q63347	PRS7_RAT	26S protease regulatory subunit 7 OS=Rattus norvegicus GN=Psmc2 PE=1 SV=3	0.0733658	0.176655	0.60153
Q6P9T8	TBB4B_RAT	Tubulin beta-4B chain OS=Rattus norvegicus GN=Tubb4b PE=1 SV=1	-0.0650511	0.177611	0.60153
P97834	CSN1_RAT	COP9 signalosome complex subunit 1 OS=Rattus norvegicus GN=Gps1 PE=1 SV=1	-0.131987	0.179755	0.604243
P63245	GBLP_RAT	Guanine nucleotide-binding protein subunit beta-2-like 1 OS=Rattus norvegicus GN=Gnb2l1 PE=1 SV=3	-0.0893495	0.181642	0.604459
P35704	PRDX2_RAT	Peroxiredoxin-2 OS=Rattus norvegicus GN=Prdx2 PE=1 SV=3	-0.0834184	0.181117	0.604459
P41123	RL13_RAT	60S ribosomal protein L13 OS=Rattus norvegicus GN=Rpl13 PE=1 SV=2	-0.185311	0.181315	0.604459
P62483	KCAB2_RAT	Voltage-gated potassium channel subunit beta-2 OS=Rattus norvegicus GN=Kcnab2 PE=1 SV=1	0.198418	0.183751	0.60944
Q6PCU2	VATE1_RAT	V-type proton ATPase subunit E 1 OS=Rattus norvegicus GN=Atp6v1e1 PE=1 SV=1	0.060922	0.184569	0.610121
Q64057	AL7A1_RAT	Alpha-aminoadipic semialdehyde dehydrogenase OS=Rattus norvegicus GN=Aldh7a1 PE=1 SV=2	0.0751448	0.185673	0.611737
P36953	AFAM_RAT	Afamin OS=Rattus norvegicus GN=Afm PE=2 SV=1	-0.113398	0.188461	0.618873
Q05764	ADDB_RAT	Beta-adducin OS=Rattus norvegicus GN=Add2 PE=2 SV=4	-0.0879956	0.19073	0.623819
O35430	APBA1_RAT	Amyloid beta A4 precursor protein-binding family A member 1 OS=Rattus norvegicus GN=Apba1 PE=1 SV=1	-0.358431	0.19417	0.623819
P54690	BCAT1_RAT	Branched-chain-amino-acid aminotransferase, cytosolic OS=Rattus norvegicus GN=Bcat1 PE=1 SV=1	-0.211551	0.192961	0.623819
O08875	DCLK1_RAT	Serine/threonine-protein kinase DCLK1 OS=Rattus norvegicus GN=Dclk1 PE=2 SV=1	0.0901808	0.203133	0.623819
Q6AYH5	DCTN2_RAT	Dynactin subunit 2 OS=Rattus norvegicus GN=Dctn2 PE=1 SV=1	0.0603487	0.201738	0.623819
P14173	DDC_RAT	Aromatic-L-amino-acid decarboxylase OS=Rattus norvegicus GN=Ddc PE=1 SV=1	-0.133938	0.199544	0.623819
P21575	DYN1_RAT	Dynamin-1 OS=Rattus norvegicus GN=Dnm1 PE=1 SV=2	0.0596977	0.196303	0.623819
Q68FR6	EF1G_RAT	Elongation factor 1-gamma OS=Rattus norvegicus GN=Eef1g PE=1 SV=3	0.0967935	0.200787	0.623819
Q6AXU6	HN1_RAT	Hematological and neurological expressed 1 protein OS=Rattus norvegicus GN=Hn1 PE=2 SV=3	0.138643	0.194945	0.623819
P17105	IP3KA_RAT	Inositol-trisphosphate 3-kinase A OS=Rattus norvegicus GN=Itpka PE=1 SV=3	0.14137	0.194237	0.623819
Q497B0	NIT2_RAT	Omega-amidase NIT2 OS=Rattus norvegicus GN=Nit2 PE=1 SV=1	0.163849	0.197882	0.623819
Q01205	ODO2_RAT	Dihydrolipoyllysine-residue succinyltransferase component of 2-oxoglutarate dehydrogenase complex, mitochondrial OS=Rattus norvegicus GN=Dlst PE=1 SV=2	0.157551	0.197354	0.623819
Q08602	PGTA_RAT	Geranylgeranyl transferase type-2 subunit alpha OS=Rattus norvegicus GN=Rabggta PE=1 SV=1	-0.107575	0.196492	0.623819
Q568Z9	PHYIP_RAT	Phytanoyl-CoA hydroxylase-interacting protein OS=Rattus norvegicus GN=Phyhip PE=2 SV=1	-0.0885246	0.202284	0.623819
Q9R0I8	PI42A_RAT	Phosphatidylinositol 5-phosphate 4-kinase type-2 alpha OS=Rattus norvegicus GN=Pip4k2a PE=1 SV=1	0.180556	0.199229	0.623819
P30427	PLEC_RAT	Plectin OS=Rattus norvegicus GN=Plec PE=1 SV=2	0.0552071	0.195216	0.623819
B0LT89	STK24_RAT	Serine/threonine-protein kinase 24 OS=Rattus norvegicus GN=Stk24 PE=2 SV=1	0.0687926	0.19828	0.623819
Q3KRE8	TBB2B_RAT	Tubulin beta-2B chain OS=Rattus norvegicus GN=Tubb2b PE=1 SV=1	0.122659	0.194992	0.623819
Q05546	TENR_RAT	Tenascin-R OS=Rattus norvegicus GN=Tnr PE=1 SV=1	-0.0502664	0.202884	0.623819
F1LNJ2	U520_RAT	U5 small nuclear ribonucleoprotein 200 kDa helicase OS=Rattus norvegicus GN=Snrnp200 PE=1 SV=1	-0.145885	0.193632	0.623819
Q499N6	UBXN1_RAT	UBX domain-containing protein 1 OS=Rattus norvegicus GN=Ubxn1 PE=2 SV=2	0.128363	0.202717	0.623819
P27682	7B2_RAT	Neuroendocrine protein 7B2 OS=Rattus norvegicus GN=Scg5 PE=1 SV=1	0.152151	0.206483	0.630811
P45592	COF1_RAT	Cofilin-1 OS=Rattus norvegicus GN=Cfl1 PE=1 SV=3	0.0548046	0.20694	0.630811
P09812	PYGM_RAT	Glycogen phosphorylase, muscle form OS=Rattus norvegicus GN=Pygm PE=2 SV=5	0.045801	0.207312	0.630811
Q8CF97	VCIP1_RAT	Deubiquitinating protein VCIP135 OS=Rattus norvegicus GN=Vcpip1 PE=1 SV=2	-0.129338	0.208214	0.631624
Q3B8Q0	MARE2_RAT	Microtubule-associated protein RP/EB family member 2 OS=Rattus norvegicus GN=Mapre2 PE=2 SV=1	-0.0634161	0.210032	0.633278
P62198	PRS8_RAT	26S protease regulatory subunit 8 OS=Rattus norvegicus GN=Psmc5 PE=1 SV=1	0.129056	0.209608	0.633278
P84087	CPLX2_RAT	Complexin-2 OS=Rattus norvegicus GN=Cplx2 PE=1 SV=1	0.144408	0.211413	0.635516
Q62829	PAK3_RAT	Serine/threonine-protein kinase PAK 3 OS=Rattus norvegicus GN=Pak3 PE=1 SV=1	-0.0899789	0.212685	0.637415
P52303	AP1B1_RAT	AP-1 complex subunit beta-1 OS=Rattus norvegicus GN=Ap1b1 PE=1 SV=1	-0.0920578	0.215719	0.641156
Q64611	CSAD_RAT	Cysteine sulfinic acid decarboxylase OS=Rattus norvegicus GN=Csad PE=1 SV=1	-0.160098	0.215867	0.641156
Q64649	KPB1_RAT	Phosphorylase b kinase regulatory subunit alpha, skeletal muscle isoform OS=Rattus norvegicus GN=Phka1 PE=2 SV=2	-0.110393	0.214921	0.641156
P11598	PDIA3_RAT	Protein disulfide-isomerase A3 OS=Rattus norvegicus GN=Pdia3 PE=1 SV=2	-0.0697501	0.216987	0.641344
P37377	SYUA_RAT	Alpha-synuclein OS=Rattus norvegicus GN=Snca PE=1 SV=1	0.0739196	0.217219	0.641344
Q5U318	PEA15_RAT	Astrocytic phosphoprotein PEA-15 OS=Rattus norvegicus GN=Pea15 PE=1 SV=1	-0.0981705	0.219426	0.645944
P18666	ML12B_RAT	Myosin regulatory light chain 12B OS=Rattus norvegicus GN=Myl12b PE=1 SV=3	0.0552375	0.220921	0.647714
P60868	RS20_RAT	40S ribosomal protein S20 OS=Rattus norvegicus GN=Rps20 PE=3 SV=1	-0.10219	0.221329	0.647714
P97697	IMPA1_RAT	Inositol monophosphatase 1 OS=Rattus norvegicus GN=Impa1 PE=1 SV=2	-0.0613084	0.223389	0.651826
P11884	ALDH2_RAT	Aldehyde dehydrogenase, mitochondrial OS=Rattus norvegicus GN=Aldh2 PE=1 SV=1	0.096044	0.22521	0.655216
Q498R7	CA123_RAT	UPF0587 protein C1orf123 homolog OS=Rattus norvegicus PE=2 SV=1	-0.0502128	0.231785	0.657268
Q5XI32	CAPZB_RAT	F-actin-capping protein subunit beta OS=Rattus norvegicus GN=Capzb PE=1 SV=1	0.0283073	0.231078	0.657268
Q6P4Z9	CSN8_RAT	COP9 signalosome complex subunit 8 OS=Rattus norvegicus GN=Cops8 PE=2 SV=1	0.141712	0.233128	0.657268
P82995	HS90A_RAT	Heat shock protein HSP 90-alpha OS=Rattus norvegicus GN=Hsp90aa1 PE=1 SV=3	-0.0384943	0.233842	0.657268
Q99MY2	NUDT4_RAT	Diphosphoinositol polyphosphate phosphohydrolase 2 OS=Rattus norvegicus GN=Nudt4 PE=2 SV=1	0.164126	0.2271	0.657268
P10687	PLCB1_RAT	1-phosphatidylinositol 4,5-bisphosphate phosphodiesterase beta-1 OS=Rattus norvegicus GN=Plcb1 PE=1 SV=1	-0.186423	0.229852	0.657268
Q63569	PRS6A_RAT	26S protease regulatory subunit 6A OS=Rattus norvegicus GN=Psmc3 PE=2 SV=1	0.0777947	0.233473	0.657268
Q641W4	RFC2_RAT	Replication factor C subunit 2 OS=Rattus norvegicus GN=Rfc2 PE=2 SV=1	0.18522	0.227931	0.657268
Q5FVJ0	RUFY3_RAT	Protein RUFY3 OS=Rattus norvegicus GN=Rufy3 PE=1 SV=1	-0.0321312	0.227499	0.657268
Q5XI22	THIC_RAT	Acetyl-CoA acetyltransferase, cytosolic OS=Rattus norvegicus GN=Acat2 PE=1 SV=1	-0.113207	0.232588	0.657268
D3ZQG6	TRIM2_RAT	Tripartite motif-containing protein 2 OS=Rattus norvegicus GN=Trim2 PE=1 SV=2	-0.0693862	0.233464	0.657268
Q5M7A4	UBA5_RAT	Ubiquitin-like modifier-activating enzyme 5 OS=Rattus norvegicus GN=Uba5 PE=2 SV=1	0.117122	0.22925	0.657268
P51647	AL1A1_RAT	Retinal dehydrogenase 1 OS=Rattus norvegicus GN=Aldh1a1 PE=1 SV=3	-0.0797255	0.240078	0.658065
Q8CG45	ARK72_RAT	Aflatoxin B1 aldehyde reductase member 2 OS=Rattus norvegicus GN=Akr7a2 PE=1 SV=2	0.0458752	0.237299	0.658065
P18265	GSK3A_RAT	Glycogen synthase kinase-3 alpha OS=Rattus norvegicus GN=Gsk3a PE=1 SV=1	-0.0997445	0.237618	0.658065
Q9Z2L9	NDRG4_RAT	Protein NDRG4 OS=Rattus norvegicus GN=Ndrg4 PE=2 SV=1	-0.0990404	0.23814	0.658065
P07633	PCCB_RAT	Propionyl-CoA carboxylase beta chain, mitochondrial OS=Rattus norvegicus GN=Pccb PE=2 SV=1	0.128448	0.239977	0.658065
Q6XQN1	PNCB_RAT	Nicotinate phosphoribosyltransferase OS=Rattus norvegicus GN=Naprt1 PE=2 SV=1	0.200658	0.239733	0.658065
P18420	PSA1_RAT	Proteasome subunit alpha type-1 OS=Rattus norvegicus GN=Psma1 PE=1 SV=2	0.0636715	0.239066	0.658065
Q6RJR6	RTN3_RAT	Reticulon-3 OS=Rattus norvegicus GN=Rtn3 PE=1 SV=1	0.125702	0.238518	0.658065
Q8CG07	WRIP1_RAT	ATPase WRNIP1 OS=Rattus norvegicus GN=Wrnip1 PE=2 SV=1	0.142931	0.237859	0.658065
Q9JLJ3	AL9A1_RAT	4-trimethylaminobutyraldehyde dehydrogenase OS=Rattus norvegicus GN=Aldh9a1 PE=1 SV=1	-0.0735032	0.244733	0.663
Q157S1	CRTC1_RAT	CREB-regulated transcription coactivator 1 OS=Rattus norvegicus GN=Crtc1 PE=1 SV=1	0.14151	0.24642	0.663
Q9JHU0	DPYL5_RAT	Dihydropyrimidinase-related protein 5 OS=Rattus norvegicus GN=Dpysl5 PE=1 SV=1	-0.0498695	0.245148	0.663
P63319	KPCG_RAT	Protein kinase C gamma type OS=Rattus norvegicus GN=Prkcg PE=1 SV=1	-0.0692891	0.244216	0.663
Q6AYN4	PHIPL_RAT	Phytanoyl-CoA hydroxylase-interacting protein-like OS=Rattus norvegicus GN=Phyhipl PE=2 SV=2	-0.0706648	0.246277	0.663
O35814	STIP1_RAT	Stress-induced-phosphoprotein 1 OS=Rattus norvegicus GN=Stip1 PE=1 SV=1	0.0414462	0.246543	0.663
Q9EQS0	TALDO_RAT	Transaldolase OS=Rattus norvegicus GN=Taldo1 PE=1 SV=2	0.0615935	0.246091	0.663
P62994	GRB2_RAT	Growth factor receptor-bound protein 2 OS=Rattus norvegicus GN=Grb2 PE=1 SV=1	0.0583894	0.247516	0.663823
P62161	CALM_RAT	Calmodulin OS=Rattus norvegicus GN=Calm1 PE=1 SV=2	-0.0658719	0.249014	0.664261
Q2TL32	UBR4_RAT	E3 ubiquitin-protein ligase UBR4 OS=Rattus norvegicus GN=Ubr4 PE=1 SV=2	-0.107247	0.248652	0.664261
P10536	RAB1B_RAT	Ras-related protein Rab-1B OS=Rattus norvegicus GN=Rab1b PE=1 SV=1	0.0925448	0.252544	0.671876
P80254	DOPD_RAT	D-dopachrome decarboxylase OS=Rattus norvegicus GN=Ddt PE=1 SV=3	0.126301	0.253267	0.672002
Q794E4	HNRPF_RAT	Heterogeneous nuclear ribonucleoprotein F OS=Rattus norvegicus GN=Hnrnpf PE=1 SV=3	-0.104966	0.254747	0.674132
P15178	SYDC_RAT	Aspartate--tRNA ligase, cytoplasmic OS=Rattus norvegicus GN=Dars PE=2 SV=1	-0.11701	0.257797	0.679157
Q63610	TPM3_RAT	Tropomyosin alpha-3 chain OS=Rattus norvegicus GN=Tpm3 PE=1 SV=2	-0.0535241	0.258011	0.679157
P50475	SYAC_RAT	Alanine--tRNA ligase, cytoplasmic OS=Rattus norvegicus GN=Aars PE=1 SV=3	-0.0511663	0.25875	0.679304
Q07266	DREB_RAT	Drebrin OS=Rattus norvegicus GN=Dbn1 PE=2 SV=3	-0.0648951	0.260025	0.680074
Q6AYR2	NDRG3_RAT	Protein NDRG3 OS=Rattus norvegicus GN=Ndrg3 PE=2 SV=1	-0.113875	0.26041	0.680074
P08592	A4_RAT	Amyloid beta A4 protein OS=Rattus norvegicus GN=App PE=1 SV=2	0.0536648	0.26883	0.685406
P60711	ACTB_RAT	Actin, cytoplasmic 1 OS=Rattus norvegicus GN=Actb PE=1 SV=1	-0.0800828	0.266407	0.685406
Q78P75	DYL2_RAT	Dynein light chain 2, cytoplasmic OS=Rattus norvegicus GN=Dynll2 PE=1 SV=1	0.106732	0.268924	0.685406
Q4FZY0	EFHD2_RAT	EF-hand domain-containing protein D2 OS=Rattus norvegicus GN=Efhd2 PE=1 SV=1	0.0482262	0.265709	0.685406
P07483	FABPH_RAT	Fatty acid-binding protein, heart OS=Rattus norvegicus GN=Fabp3 PE=1 SV=2	0.0607118	0.268181	0.685406
P47819	GFAP_RAT	Glial fibrillary acidic protein OS=Rattus norvegicus GN=Gfap PE=1 SV=2	-0.110353	0.263379	0.685406
P18266	GSK3B_RAT	Glycogen synthase kinase-3 beta OS=Rattus norvegicus GN=Gsk3b PE=1 SV=1	0.125309	0.267531	0.685406
Q8K3X8	HSBP1_RAT	Heat shock factor-binding protein 1 OS=Rattus norvegicus GN=Hsbp1 PE=3 SV=1	-0.125086	0.264909	0.685406
P05544	SPA3L_RAT	Serine protease inhibitor A3L OS=Rattus norvegicus GN=Serpina3l PE=1 SV=3	-0.103735	0.269374	0.685406
P24329	THTR_RAT	Thiosulfate sulfurtransferase OS=Rattus norvegicus GN=Tst PE=1 SV=3	0.0946573	0.266981	0.685406
P41542	USO1_RAT	General vesicular transport factor p115 OS=Rattus norvegicus GN=Uso1 PE=1 SV=1	-0.0627226	0.270029	0.685406
O88884	AKAP1_RAT	A-kinase anchor protein 1, mitochondrial OS=Rattus norvegicus GN=Akap1 PE=2 SV=1	0.0632095	0.27439	0.691052
P27653	C1TC_RAT	C-1-tetrahydrofolate synthase, cytoplasmic OS=Rattus norvegicus GN=Mthfd1 PE=1 SV=3	0.0844388	0.275264	0.691052
Q8K4F8	CCNF_RAT	Cyclin-F OS=Rattus norvegicus GN=Ccnf PE=2 SV=2	0.167546	0.274824	0.691052
Q7M0E3	DEST_RAT	Destrin OS=Rattus norvegicus GN=Dstn PE=1 SV=3	0.0459585	0.27402	0.691052
Q6P6R2	DLDH_RAT	Dihydrolipoyl dehydrogenase, mitochondrial OS=Rattus norvegicus GN=Dld PE=1 SV=1	0.244256	0.277115	0.691052
P62959	HINT1_RAT	Histidine triad nucleotide-binding protein 1 OS=Rattus norvegicus GN=Hint1 PE=1 SV=5	-0.0953898	0.27705	0.691052
Q641W2	MYG1_RAT	UPF0160 protein MYG1, mitochondrial OS=Rattus norvegicus GN=Myg1 PE=1 SV=1	-0.127438	0.276336	0.691052
P70645	BLMH_RAT	Bleomycin hydrolase OS=Rattus norvegicus GN=Blmh PE=1 SV=1	0.0882794	0.278059	0.691672
P61983	1433G_RAT	14-3-3 protein gamma OS=Rattus norvegicus GN=Ywhag PE=1 SV=2	0.0640822	0.28249	0.693422
Q1JU68	EIF3A_RAT	Eukaryotic translation initiation factor 3 subunit A OS=Rattus norvegicus GN=Eif3a PE=2 SV=2	0.0789897	0.282601	0.693422
P97874	GAK_RAT	Cyclin-G-associated kinase OS=Rattus norvegicus GN=Gak PE=2 SV=1	0.0764775	0.282603	0.693422
P61980	HNRPK_RAT	Heterogeneous nuclear ribonucleoprotein K OS=Rattus norvegicus GN=Hnrnpk PE=1 SV=1	0.068466	0.283528	0.693422
P18298	METK2_RAT	S-adenosylmethionine synthase isoform type-2 OS=Rattus norvegicus GN=Mat2a PE=1 SV=1	0.049131	0.280767	0.693422
P09951	SYN1_RAT	Synapsin-1 OS=Rattus norvegicus GN=Syn1 PE=1 SV=3	0.110424	0.280155	0.693422
Q920J4	TXNL1_RAT	Thioredoxin-like protein 1 OS=Rattus norvegicus GN=Txnl1 PE=1 SV=3	0.0542126	0.283641	0.693422
Q5I0G4	SYG_RAT	Glycine--tRNA ligase (Fragment) OS=Rattus norvegicus GN=Gars PE=1 SV=1	0.0606137	0.285223	0.695581
Q641Y8	DDX1_RAT	ATP-dependent RNA helicase DDX1 OS=Rattus norvegicus GN=Ddx1 PE=2 SV=1	0.07088	0.287299	0.69893
P67874	CSK2B_RAT	Casein kinase II subunit beta OS=Rattus norvegicus GN=Csnk2b PE=1 SV=1	0.0929462	0.289139	0.701692
P85969	SNAB_RAT	Beta-soluble NSF attachment protein OS=Rattus norvegicus GN=Napb PE=1 SV=1	-0.0921938	0.293129	0.709643
P46844	BIEA_RAT	Biliverdin reductase A OS=Rattus norvegicus GN=Blvra PE=1 SV=1	-0.0684855	0.295419	0.711723
Q71UE8	NEDD8_RAT	NEDD8 OS=Rattus norvegicus GN=Nedd8 PE=1 SV=1	-0.061123	0.29499	0.711723
Q6MG49	BAG6_RAT	Large proline-rich protein BAG6 OS=Rattus norvegicus GN=Bag6 PE=2 SV=2	0.0893923	0.29691	0.713587
P34058	HS90B_RAT	Heat shock protein HSP 90-beta OS=Rattus norvegicus GN=Hsp90ab1 PE=1 SV=4	0.0360965	0.299154	0.717248
P15999	ATPA_RAT	ATP synthase subunit alpha, mitochondrial OS=Rattus norvegicus GN=Atp5a1 PE=1 SV=2	-0.0954726	0.300694	0.719208
P38652	PGM1_RAT	Phosphoglucomutase-1 OS=Rattus norvegicus GN=Pgm1 PE=1 SV=2	0.032482	0.301755	0.720015
Q4V7A0	WDR61_RAT	WD repeat-containing protein 61 OS=Rattus norvegicus GN=Wdr61 PE=1 SV=1	0.0814391	0.303116	0.721531
O35274	NEB2_RAT	Neurabin-2 OS=Rattus norvegicus GN=Ppp1r9b PE=1 SV=1	-0.0676437	0.30394	0.721766
Q3T1K5	CAZA2_RAT	F-actin-capping protein subunit alpha-2 OS=Rattus norvegicus GN=Capza2 PE=1 SV=1	-0.0824792	0.30469	0.721826
Q64640	ADK_RAT	Adenosine kinase OS=Rattus norvegicus GN=Adk PE=1 SV=3	-0.0815243	0.317233	0.726647
O35889	AFAD_RAT	Afadin OS=Rattus norvegicus GN=Mllt4 PE=1 SV=1	0.159062	0.324558	0.726647
P36972	APT_RAT	Adenine phosphoribosyltransferase OS=Rattus norvegicus GN=Aprt PE=1 SV=1	0.0412965	0.320853	0.726647
Q63092	CAMKV_RAT	CaM kinase-like vesicle-associated protein OS=Rattus norvegicus GN=Camkv PE=1 SV=1	0.103102	0.319019	0.726647
Q07009	CAN2_RAT	Calpain-2 catalytic subunit OS=Rattus norvegicus GN=Capn2 PE=1 SV=3	-0.0536233	0.325612	0.726647
D4A4T9	CHRD1_RAT	Cysteine and histidine-rich domain-containing protein 1 OS=Rattus norvegicus GN=Chordc1 PE=3 SV=1	0.0999614	0.314414	0.726647
Q921A4	CYGB_RAT	Cytoglobin OS=Rattus norvegicus GN=Cygb PE=1 SV=1	-0.195168	0.320287	0.726647
Q08877	DYN3_RAT	Dynamin-3 OS=Rattus norvegicus GN=Dnm3 PE=1 SV=2	0.0853244	0.325026	0.726647
A0JPM9	EIF3J_RAT	Eukaryotic translation initiation factor 3 subunit J OS=Rattus norvegicus GN=Eif3j PE=2 SV=1	-0.11049	0.308297	0.726647
P70619	GSHR_RAT	Glutathione reductase (Fragment) OS=Rattus norvegicus GN=Gsr PE=2 SV=2	-0.103266	0.328425	0.726647
P41565	IDHG1_RAT	Isocitrate dehydrogenase [NAD] subunit gamma 1, mitochondrial OS=Rattus norvegicus GN=Idh3g PE=2 SV=2	0.167497	0.323448	0.726647
P38656	LA_RAT	Lupus La protein homolog OS=Rattus norvegicus GN=Ssb PE=2 SV=1	0.0402311	0.319844	0.726647
Q66HR2	MARE1_RAT	Microtubule-associated protein RP/EB family member 1 OS=Rattus norvegicus GN=Mapre1 PE=1 SV=3	-0.0884474	0.326558	0.726647
Q6JE36	NDRG1_RAT	Protein NDRG1 OS=Rattus norvegicus GN=Ndrg1 PE=1 SV=1	0.212639	0.316043	0.726647
B0BNM1	NNRE_RAT	NAD(P)H-hydrate epimerase OS=Rattus norvegicus GN=Apoa1bp PE=2 SV=1	-0.0834978	0.314329	0.726647
A0JPJ7	OLA1_RAT	Obg-like ATPase 1 OS=Rattus norvegicus GN=Ola1 PE=2 SV=1	0.0721326	0.328634	0.726647
P97608	OPLA_RAT	5-oxoprolinase OS=Rattus norvegicus GN=Oplah PE=1 SV=2	-0.0678674	0.320503	0.726647
Q5I0D7	PEPD_RAT	Xaa-Pro dipeptidase OS=Rattus norvegicus GN=Pepd PE=2 SV=1	-0.0615333	0.311248	0.726647
P18421	PSB1_RAT	Proteasome subunit beta type-1 OS=Rattus norvegicus GN=Psmb1 PE=1 SV=3	0.0705572	0.326552	0.726647
O88761	PSMD1_RAT	26S proteasome non-ATPase regulatory subunit 1 OS=Rattus norvegicus GN=Psmd1 PE=2 SV=1	0.0991309	0.322243	0.726647
Q63797	PSME1_RAT	Proteasome activator complex subunit 1 OS=Rattus norvegicus GN=Psme1 PE=2 SV=1	-0.0940857	0.307717	0.726647
Q68A21	PURB_RAT	Transcriptional activator protein Pur-beta OS=Rattus norvegicus GN=Purb PE=1 SV=3	0.033547	0.314017	0.726647
F1M386	RPGF2_RAT	Rap guanine nucleotide exchange factor 2 OS=Rattus norvegicus GN=Rapgef2 PE=1 SV=2	0.113766	0.320455	0.726647
Q5HZY2	SAR1B_RAT	GTP-binding protein SAR1b OS=Rattus norvegicus GN=Sar1b PE=2 SV=1	0.0494601	0.316778	0.726647
Q6PEC4	SKP1_RAT	S-phase kinase-associated protein 1 OS=Rattus norvegicus GN=Skp1 PE=2 SV=3	-0.0852616	0.309713	0.726647
P19332	TAU_RAT	Microtubule-associated protein tau OS=Rattus norvegicus GN=Mapt PE=1 SV=3	0.0524258	0.320564	0.726647
Q7TPB1	TCPD_RAT	T-complex protein 1 subunit delta OS=Rattus norvegicus GN=Cct4 PE=1 SV=3	0.0596908	0.327403	0.726647
Q6P502	TCPG_RAT	T-complex protein 1 subunit gamma OS=Rattus norvegicus GN=Cct3 PE=1 SV=1	0.0472372	0.323205	0.726647
P48500	TPIS_RAT	Triosephosphate isomerase OS=Rattus norvegicus GN=Tpi1 PE=1 SV=2	0.052896	0.313611	0.726647
Q7M767	UB2V2_RAT	Ubiquitin-conjugating enzyme E2 variant 2 OS=Rattus norvegicus GN=Ube2v2 PE=1 SV=3	0.0388409	0.320902	0.726647
Q499N5	ACSF2_RAT	Acyl-CoA synthetase family member 2, mitochondrial OS=Rattus norvegicus GN=Acsf2 PE=2 SV=1	0.072941	0.340553	0.727841
Q66HR5	CACO1_RAT	Calcium-binding and coiled-coil domain-containing protein 1 OS=Rattus norvegicus GN=Calcoco1 PE=2 SV=1	-0.100517	0.338775	0.727841
Q4V8E4	CC104_RAT	Coiled-coil domain-containing protein 104 OS=Rattus norvegicus GN=Ccdc104 PE=2 SV=1	-0.111749	0.331283	0.727841
P08081	CLCA_RAT	Clathrin light chain A OS=Rattus norvegicus GN=Clta PE=1 SV=1	0.0475838	0.330215	0.727841
Q4V8K2	CTBL1_RAT	Beta-catenin-like protein 1 OS=Rattus norvegicus GN=Ctnnbl1 PE=2 SV=1	0.158744	0.340857	0.727841
Q63100	DC1I1_RAT	Cytoplasmic dynein 1 intermediate chain 1 OS=Rattus norvegicus GN=Dync1i1 PE=1 SV=1	-0.04005	0.335121	0.727841
P27867	DHSO_RAT	Sorbitol dehydrogenase OS=Rattus norvegicus GN=Sord PE=2 SV=4	0.0771298	0.339027	0.727841
P31016	DLG4_RAT	Disks large homolog 4 OS=Rattus norvegicus GN=Dlg4 PE=1 SV=1	-0.200542	0.340878	0.727841
P07323	ENOG_RAT	Gamma-enolase OS=Rattus norvegicus GN=Eno2 PE=1 SV=2	0.0357736	0.33566	0.727841
Q6P6V0	G6PI_RAT	Glucose-6-phosphate isomerase OS=Rattus norvegicus GN=Gpi PE=1 SV=1	-0.0385248	0.334432	0.727841
P27791	KAPCA_RAT	cAMP-dependent protein kinase catalytic subunit alpha OS=Rattus norvegicus GN=Prkaca PE=1 SV=2	0.182427	0.339813	0.727841
Q561R9	LACB2_RAT	Beta-lactamase-like protein 2 OS=Rattus norvegicus GN=Lactb2 PE=2 SV=1	-0.155992	0.33739	0.727841
Q63081	PDIA6_RAT	Protein disulfide-isomerase A6 OS=Rattus norvegicus GN=Pdia6 PE=1 SV=2	-0.181164	0.338214	0.727841
P63326	RS10_RAT	40S ribosomal protein S10 OS=Rattus norvegicus GN=Rps10 PE=2 SV=1	0.112043	0.337349	0.727841
P62703	RS4X_RAT	40S ribosomal protein S4, X isoform OS=Rattus norvegicus GN=Rps4x PE=2 SV=2	-0.106457	0.333654	0.727841
Q63396	TCP4_RAT	Activated RNA polymerase II transcriptional coactivator p15 OS=Rattus norvegicus GN=Sub1 PE=2 SV=3	-0.10165	0.340498	0.727841
Q8VHU4	ELP1_RAT	Elongator complex protein 1 OS=Rattus norvegicus GN=Ikbkap PE=2 SV=1	-0.0918795	0.344135	0.732142
P62828	RAN_RAT	GTP-binding nuclear protein Ran OS=Rattus norvegicus GN=Ran PE=1 SV=3	-0.0620438	0.344364	0.732142
P26817	ARBK1_RAT	Beta-adrenergic receptor kinase 1 OS=Rattus norvegicus GN=Adrbk1 PE=2 SV=1	0.0893333	0.347018	0.736212
Q05982	NDKA_RAT	Nucleoside diphosphate kinase A OS=Rattus norvegicus GN=Nme1 PE=1 SV=1	0.0790367	0.348122	0.736982
Q9ERB4	CSPG2_RAT	Versican core protein (Fragments) OS=Rattus norvegicus GN=Vcan PE=2 SV=2	-0.11475	0.352326	0.741151
P34064	PSA5_RAT	Proteasome subunit alpha type-5 OS=Rattus norvegicus GN=Psma5 PE=2 SV=1	-0.0624396	0.351154	0.741151
Q5M9I5	QCR6_RAT	Cytochrome b-c1 complex subunit 6, mitochondrial OS=Rattus norvegicus GN=Uqcrh PE=3 SV=1	0.0963477	0.351895	0.741151
Q5PQN7	LZIC_RAT	Protein LZIC OS=Rattus norvegicus GN=Lzic PE=2 SV=1	0.0690215	0.353426	0.741897
P10688	PLCD1_RAT	1-phosphatidylinositol 4,5-bisphosphate phosphodiesterase delta-1 OS=Rattus norvegicus GN=Plcd1 PE=1 SV=1	0.0694311	0.354963	0.743553
Q6AY56	TBA8_RAT	Tubulin alpha-8 chain OS=Rattus norvegicus GN=Tuba8 PE=2 SV=1	0.104088	0.358948	0.750323
Q4QQT4	2AAB_RAT	Serine/threonine-protein phosphatase 2A 65 kDa regulatory subunit A beta isoform OS=Rattus norvegicus GN=Ppp2r1b PE=2 SV=1	0.0540858	0.388517	0.751633
Q63270	ACOC_RAT	Cytoplasmic aconitate hydratase OS=Rattus norvegicus GN=Aco1 PE=1 SV=1	0.041767	0.401089	0.751633
Q9Z1P2	ACTN1_RAT	Alpha-actinin-1 OS=Rattus norvegicus GN=Actn1 PE=1 SV=1	-0.0444386	0.390313	0.751633
P25409	ALAT1_RAT	Alanine aminotransferase 1 OS=Rattus norvegicus GN=Gpt PE=1 SV=2	-0.101213	0.370675	0.751633
Q02356	AMPD2_RAT	AMP deaminase 2 OS=Rattus norvegicus GN=Ampd2 PE=2 SV=2	0.0631366	0.369219	0.751633
P84092	AP2M1_RAT	AP-2 complex subunit mu OS=Rattus norvegicus GN=Ap2m1 PE=1 SV=1	-0.0440897	0.40151	0.751633
P43138	APEX1_RAT	DNA-(apurinic or apyrimidinic site) lyase OS=Rattus norvegicus GN=Apex1 PE=1 SV=2	0.125337	0.36712	0.751633
Q5M7U6	ARP2_RAT	Actin-related protein 2 OS=Rattus norvegicus GN=Actr2 PE=1 SV=1	-0.0747356	0.376017	0.751633
Q9WUC4	ATOX1_RAT	Copper transport protein ATOX1 OS=Rattus norvegicus GN=Atox1 PE=1 SV=1	0.162362	0.383987	0.751633
D4A631	BIG1_RAT	Brefeldin A-inhibited guanine nucleotide-exchange protein 1 OS=Rattus norvegicus GN=Arfgef1 PE=1 SV=1	-0.0682646	0.37864	0.751633
P63100	CANB1_RAT	Calcineurin subunit B type 1 OS=Rattus norvegicus GN=Ppp3r1 PE=1 SV=2	-0.0568264	0.404847	0.751633
Q62717	CAPS1_RAT	Calcium-dependent secretion activator 1 OS=Rattus norvegicus GN=Cadps PE=1 SV=1	-0.0269607	0.412787	0.751633
P24268	CATD_RAT	Cathepsin D OS=Rattus norvegicus GN=Ctsd PE=1 SV=1	-0.0732019	0.396718	0.751633
P47727	CBR1_RAT	Carbonyl reductase [NADPH] 1 OS=Rattus norvegicus GN=Cbr1 PE=1 SV=2	0.103992	0.410713	0.751633
Q75UQ2	CFDP1_RAT	Craniofacial development protein 1 OS=Rattus norvegicus GN=Cfdp1 PE=2 SV=1	0.0878908	0.371056	0.751633
P11442	CLH1_RAT	Clathrin heavy chain 1 OS=Rattus norvegicus GN=Cltc PE=1 SV=3	0.0242037	0.396381	0.751633
O35142	COPB2_RAT	Coatomer subunit beta' OS=Rattus norvegicus GN=Copb2 PE=1 SV=3	0.0488888	0.386455	0.751633
O89046	COR1B_RAT	Coronin-1B OS=Rattus norvegicus GN=Coro1b PE=1 SV=1	-0.0770155	0.372853	0.751633
Q62915	CSKP_RAT	Peripheral plasma membrane protein CASK OS=Rattus norvegicus GN=Cask PE=1 SV=1	-0.0686793	0.412441	0.751633
Q9JJ31	CUL5_RAT	Cullin-5 OS=Rattus norvegicus GN=Cul5 PE=1 SV=3	-0.112856	0.383834	0.751633
Q9ESI7	DCX_RAT	Neuronal migration protein doublecortin OS=Rattus norvegicus GN=Dcx PE=1 SV=2	0.118748	0.40036	0.751633
Q9ESW0	DDB1_RAT	DNA damage-binding protein 1 OS=Rattus norvegicus GN=Ddb1 PE=2 SV=1	-0.038572	0.371951	0.751633
Q63413	DX39B_RAT	Spliceosome RNA helicase Ddx39b OS=Rattus norvegicus GN=Ddx39b PE=1 SV=3	0.0799351	0.384054	0.751633
Q8R491	EHD3_RAT	EH domain-containing protein 3 OS=Rattus norvegicus GN=Ehd3 PE=1 SV=2	0.0573707	0.403189	0.751633
Q5RJL0	ERMIN_RAT	Ermin OS=Rattus norvegicus GN=Ermn PE=1 SV=1	0.140417	0.367876	0.751633
Q68FU3	ETFB_RAT	Electron transfer flavoprotein subunit beta OS=Rattus norvegicus GN=Etfb PE=2 SV=3	-0.0622616	0.393021	0.751633
P50503	F10A1_RAT	Hsc70-interacting protein OS=Rattus norvegicus GN=St13 PE=1 SV=1	0.0533284	0.387581	0.751633
Q5FVF1	F10C1_RAT	Protein FRA10AC1 homolog OS=Rattus norvegicus GN=Fra10ac1 PE=2 SV=1	-0.0591697	0.365205	0.751633
P14408	FUMH_RAT	Fumarate hydratase, mitochondrial OS=Rattus norvegicus GN=Fh PE=1 SV=1	0.0896722	0.409571	0.751633
P18645	GALE_RAT	UDP-glucose 4-epimerase OS=Rattus norvegicus GN=Gale PE=2 SV=1	0.0394206	0.413971	0.751633
Q03555	GEPH_RAT	Gephyrin OS=Rattus norvegicus GN=Gphn PE=1 SV=3	0.0664829	0.393782	0.751633
P09606	GLNA_RAT	Glutamine synthetase OS=Rattus norvegicus GN=Glul PE=1 SV=3	0.0972797	0.380526	0.751633
P14942	GSTA4_RAT	Glutathione S-transferase alpha-4 OS=Rattus norvegicus GN=Gsta4 PE=1 SV=2	0.0850277	0.404839	0.751633
P01946	HBA_RAT	Hemoglobin subunit alpha-1/2 OS=Rattus norvegicus GN=Hba1 PE=1 SV=3	-0.129252	0.401147	0.751633
P02091	HBB1_RAT	Hemoglobin subunit beta-1 OS=Rattus norvegicus GN=Hbb PE=1 SV=3	-0.139111	0.377694	0.751633
Q923W4	HDGR3_RAT	Hepatoma-derived growth factor-related protein 3 OS=Rattus norvegicus GN=Hdgfrp3 PE=2 SV=1	-0.0842926	0.401509	0.751633
P17425	HMCS1_RAT	Hydroxymethylglutaryl-CoA synthase, cytoplasmic OS=Rattus norvegicus GN=Hmgcs1 PE=1 SV=1	-0.0439985	0.37267	0.751633
P62749	HPCL1_RAT	Hippocalcin-like protein 1 OS=Rattus norvegicus GN=Hpcal1 PE=1 SV=2	-0.0562679	0.371128	0.751633
Q07439	HSP71_RAT	Heat shock 70 kDa protein 1A/1B OS=Rattus norvegicus GN=Hspa1a PE=2 SV=2	0.106783	0.406593	0.751633
P12368	KAP2_RAT	cAMP-dependent protein kinase type II-alpha regulatory subunit OS=Rattus norvegicus GN=Prkar2a PE=1 SV=3	-0.0712278	0.401687	0.751633
P15791	KCC2D_RAT	Calcium/calmodulin-dependent protein kinase type II subunit delta OS=Rattus norvegicus GN=Camk2d PE=1 SV=1	-0.15703	0.402633	0.751633
P09216	KPCE_RAT	Protein kinase C epsilon type OS=Rattus norvegicus GN=Prkce PE=1 SV=1	-0.0598924	0.371721	0.751633
O88989	MDHC_RAT	Malate dehydrogenase, cytoplasmic OS=Rattus norvegicus GN=Mdh1 PE=1 SV=3	-0.0358501	0.411509	0.751633
P21708	MK03_RAT	Mitogen-activated protein kinase 3 OS=Rattus norvegicus GN=Mapk3 PE=1 SV=5	-0.0353969	0.373533	0.751633
Q64119	MYL6_RAT	Myosin light polypeptide 6 OS=Rattus norvegicus GN=Myl6 PE=1 SV=3	0.0620218	0.396883	0.751633
Q1HCL7	NAKD2_RAT	NAD kinase 2, mitochondrial OS=Rattus norvegicus GN=Nadk2 PE=2 SV=1	-0.121076	0.399532	0.751633
P55161	NCKP1_RAT	Nck-associated protein 1 OS=Rattus norvegicus GN=Nckap1 PE=2 SV=1	-0.283402	0.376077	0.751633
P69682	NECP1_RAT	Adaptin ear-binding coat-associated protein 1 OS=Rattus norvegicus GN=Necap1 PE=1 SV=1	0.0343127	0.362685	0.751633
Q04940	NEUG_RAT	Neurogranin OS=Rattus norvegicus GN=Nrgn PE=1 SV=1	0.0965282	0.402861	0.751633
P29476	NOS1_RAT	Nitric oxide synthase, brain OS=Rattus norvegicus GN=Nos1 PE=1 SV=1	-0.0479984	0.38362	0.751633
O35264	PA1B2_RAT	Platelet-activating factor acetylhydrolase IB subunit beta OS=Rattus norvegicus GN=Pafah1b2 PE=1 SV=1	0.0637485	0.405438	0.751633
O88637	PCY2_RAT	Ethanolamine-phosphate cytidylyltransferase OS=Rattus norvegicus GN=Pcyt2 PE=1 SV=1	-0.0517031	0.41472	0.751633
P04785	PDIA1_RAT	Protein disulfide-isomerase OS=Rattus norvegicus GN=P4hb PE=1 SV=2	0.0551053	0.384111	0.751633
O88377	PI42B_RAT	Phosphatidylinositol 5-phosphate 4-kinase type-2 beta OS=Rattus norvegicus GN=Pip4k2b PE=1 SV=1	-0.0728371	0.368087	0.751633
Q99MC0	PP14A_RAT	Protein phosphatase 1 regulatory subunit 14A OS=Rattus norvegicus GN=Ppp1r14a PE=2 SV=1	-0.053806	0.389686	0.751633
O70196	PPCE_RAT	Prolyl endopeptidase OS=Rattus norvegicus GN=Prep PE=1 SV=1	-0.024122	0.412565	0.751633
P62963	PROF1_RAT	Profilin-1 OS=Rattus norvegicus GN=Pfn1 PE=1 SV=2	-0.054992	0.379748	0.751633
P17220	PSA2_RAT	Proteasome subunit alpha type-2 OS=Rattus norvegicus GN=Psma2 PE=1 SV=3	0.0824402	0.39354	0.751633
P41499	PTN11_RAT	Tyrosine-protein phosphatase non-receptor type 11 OS=Rattus norvegicus GN=Ptpn11 PE=1 SV=4	0.0655337	0.394476	0.751633
P51607	RENBP_RAT	N-acylglucosamine 2-epimerase OS=Rattus norvegicus GN=Renbp PE=2 SV=2	0.128962	0.377639	0.751633
P28818	RGRF1_RAT	Ras-specific guanine nucleotide-releasing factor 1 OS=Rattus norvegicus GN=Rasgrf1 PE=1 SV=1	-0.0911904	0.410417	0.751633
Q62868	ROCK2_RAT	Rho-associated protein kinase 2 OS=Rattus norvegicus GN=Rock2 PE=1 SV=2	-0.114353	0.410359	0.751633
Q6AYT3	RTCB_RAT	tRNA-splicing ligase RtcB homolog OS=Rattus norvegicus PE=2 SV=1	0.048817	0.39207	0.751633
Q9Z2Q1	SC31A_RAT	Protein transport protein Sec31A OS=Rattus norvegicus GN=Sec31a PE=1 SV=2	-0.0311883	0.414429	0.751633
Q9WVC0	SEPT7_RAT	Septin-7 OS=Rattus norvegicus GN=Sept7 PE=1 SV=1	0.169495	0.385907	0.751633
Q7TP36	SHRM2_RAT	Protein Shroom2 OS=Rattus norvegicus GN=Shroom2 PE=2 SV=1	-0.0970188	0.384137	0.751633
P16086	SPTN1_RAT	Spectrin alpha chain, non-erythrocytic 1 OS=Rattus norvegicus GN=Sptan1 PE=1 SV=2	-0.0436373	0.377615	0.751633
Q9QWN8	SPTN2_RAT	Spectrin beta chain, non-erythrocytic 2 OS=Rattus norvegicus GN=Sptbn2 PE=1 SV=2	-0.0505856	0.404156	0.751633
Q4KM49	SYYC_RAT	Tyrosine--tRNA ligase, cytoplasmic OS=Rattus norvegicus GN=Yars PE=2 SV=3	-0.0385987	0.411516	0.751633
P62329	TYB4_RAT	Thymosin beta-4 OS=Rattus norvegicus GN=Tmsb4x PE=2 SV=2	-0.0867853	0.371967	0.751633
Q5BJU7	WASF1_RAT	Wiskott-Aldrich syndrome protein family member 1 OS=Rattus norvegicus GN=Wasf1 PE=2 SV=1	0.08623	0.396003	0.751633
Q8R478	WBP2_RAT	WW domain-binding protein 2 OS=Rattus norvegicus GN=Wbp2 PE=1 SV=1	0.07749	0.388816	0.751633
Q8VIL3	ZWINT_RAT	ZW10 interactor OS=Rattus norvegicus GN=Zwint PE=1 SV=1	0.0606635	0.378587	0.751633
P68403	KPCB_RAT	Protein kinase C beta type OS=Rattus norvegicus GN=Prkcb PE=1 SV=3	-0.0553558	0.416611	0.753687
Q66HC3	CI072_RAT	Protein C9orf72 homolog OS=Rattus norvegicus PE=2 SV=1	0.0721544	0.419483	0.754766
P62630	EF1A1_RAT	Elongation factor 1-alpha 1 OS=Rattus norvegicus GN=Eef1a1 PE=1 SV=1	-0.03157	0.418236	0.754766
Q6XVN8	MLP3A_RAT	Microtubule-associated proteins 1A/1B light chain 3A OS=Rattus norvegicus GN=Map1lc3a PE=1 SV=1	-0.101266	0.419335	0.754766
P62853	RS25_RAT	40S ribosomal protein S25 OS=Rattus norvegicus GN=Rps25 PE=2 SV=1	-0.107307	0.421289	0.756647
Q5BJS7	CPNE9_RAT	Copine-9 OS=Rattus norvegicus GN=Cpne9 PE=2 SV=1	0.0466142	0.424532	0.759394
P48199	CRP_RAT	C-reactive protein OS=Rattus norvegicus GN=Crp PE=1 SV=1	0.0875541	0.423821	0.759394
P48004	PSA7_RAT	Proteasome subunit alpha type-7 OS=Rattus norvegicus GN=Psma7 PE=1 SV=1	-0.0392326	0.425108	0.759394
P0C1X8	AAK1_RAT	AP2-associated protein kinase 1 OS=Rattus norvegicus GN=Aak1 PE=1 SV=1	-0.0781532	0.427017	0.761081
Q5PPH0	ENOPH_RAT	Enolase-phosphatase E1 OS=Rattus norvegicus GN=Enoph1 PE=2 SV=1	-0.0749696	0.428798	0.761081
P20760	IGG2A_RAT	Ig gamma-2A chain C region OS=Rattus norvegicus GN=Igg-2a PE=1 SV=1	-0.267537	0.429213	0.761081
P47858	K6PF_RAT	6-phosphofructokinase, muscle type OS=Rattus norvegicus GN=Pfkm PE=2 SV=3	0.0452429	0.429877	0.761081
P60901	PSA6_RAT	Proteasome subunit alpha type-6 OS=Rattus norvegicus GN=Psma6 PE=1 SV=1	-0.0422445	0.429501	0.761081
Q62940	NEDD4_RAT	E3 ubiquitin-protein ligase NEDD4 OS=Rattus norvegicus GN=Nedd4 PE=1 SV=1	0.0398823	0.430858	0.761464
Q5HZE4	MTNA_RAT	Methylthioribose-1-phosphate isomerase OS=Rattus norvegicus GN=Mri1 PE=2 SV=1	-0.211331	0.431871	0.7619
Q641X8	EIF3E_RAT	Eukaryotic translation initiation factor 3 subunit E OS=Rattus norvegicus GN=Eif3e PE=2 SV=1	0.0829857	0.434418	0.762009
P30009	MARCS_RAT	Myristoylated alanine-rich C-kinase substrate OS=Rattus norvegicus GN=Marcks PE=1 SV=2	-0.0628727	0.435762	0.762009
B0BN18	PFD2_RAT	Prefoldin subunit 2 OS=Rattus norvegicus GN=Pfdn2 PE=2 SV=1	0.0706067	0.43317	0.762009
P61589	RHOA_RAT	Transforming protein RhoA OS=Rattus norvegicus GN=Rhoa PE=1 SV=1	-0.0950887	0.433492	0.762009
O89049	TRXR1_RAT	Thioredoxin reductase 1, cytoplasmic OS=Rattus norvegicus GN=Txnrd1 PE=1 SV=5	-0.0498344	0.435092	0.762009
O35179	SH3G2_RAT	Endophilin-A1 OS=Rattus norvegicus GN=Sh3gl2 PE=1 SV=2	-0.0408667	0.437111	0.763027
P30713	GSTT2_RAT	Glutathione S-transferase theta-2 OS=Rattus norvegicus GN=Gstt2 PE=1 SV=3	0.0440547	0.440546	0.767676
Q99MB4	CBWD1_RAT	COBW domain-containing protein 1 OS=Rattus norvegicus GN=Cbwd1 PE=2 SV=2	0.0844803	0.441453	0.767912
P13803	ETFA_RAT	Electron transfer flavoprotein subunit alpha, mitochondrial OS=Rattus norvegicus GN=Etfa PE=1 SV=4	0.0310508	0.443458	0.768711
P63047	ST4A1_RAT	Sulfotransferase 4A1 OS=Rattus norvegicus GN=Sult4a1 PE=2 SV=1	-0.0871492	0.442971	0.768711
Q9WU49	CHSP1_RAT	Calcium-regulated heat stable protein 1 OS=Rattus norvegicus GN=Carhsp1 PE=1 SV=1	0.0767382	0.448188	0.770098
B0BNM9	GLTP_RAT	Glycolipid transfer protein OS=Rattus norvegicus GN=GLTP PE=2 SV=1	0.0417277	0.449675	0.770098
Q9QYF3	MYO5A_RAT	Unconventional myosin-Va OS=Rattus norvegicus GN=Myo5a PE=1 SV=1	-0.0521498	0.449216	0.770098
A0JPP1	NC2A_RAT	Dr1-associated corepressor OS=Rattus norvegicus GN=Drap1 PE=2 SV=1	-0.0624632	0.44605	0.770098
P63329	PP2BA_RAT	Serine/threonine-protein phosphatase 2B catalytic subunit alpha isoform OS=Rattus norvegicus GN=Ppp3ca PE=1 SV=1	0.0492822	0.445527	0.770098
Q9QUL0	PR3C1_RAT	Prolactin-3C1 OS=Rattus norvegicus GN=Prl3c1 PE=2 SV=1	0.055944	0.448149	0.770098
P62278	RS13_RAT	40S ribosomal protein S13 OS=Rattus norvegicus GN=Rps13 PE=1 SV=2	0.0893022	0.446872	0.770098
Q63468	KPRA_RAT	Phosphoribosyl pyrophosphate synthase-associated protein 1 OS=Rattus norvegicus GN=Prpsap1 PE=1 SV=1	0.0863028	0.450597	0.770351
P62260	1433E_RAT	14-3-3 protein epsilon OS=Rattus norvegicus GN=Ywhae PE=1 SV=1	0.027813	0.451899	0.770843
P18395	CSDE1_RAT	Cold shock domain-containing protein E1 OS=Rattus norvegicus GN=Csde1 PE=2 SV=1	-0.107024	0.453047	0.770843
P05545	SPA3K_RAT	Serine protease inhibitor A3K OS=Rattus norvegicus GN=Serpina3k PE=1 SV=3	-0.0742125	0.453919	0.770843
Q5FVI6	VATC1_RAT	V-type proton ATPase subunit C 1 OS=Rattus norvegicus GN=Atp6v1c1 PE=2 SV=1	0.0502721	0.453984	0.770843
P19356	HEM3_RAT	Porphobilinogen deaminase OS=Rattus norvegicus GN=Hmbs PE=1 SV=2	0.0801398	0.455646	0.771034
Q9WUS0	KAD4_RAT	GTP:AMP phosphotransferase AK4, mitochondrial OS=Rattus norvegicus GN=Ak4 PE=2 SV=1	0.170311	0.454939	0.771034
Q5FWY5	AIP_RAT	AH receptor-interacting protein OS=Rattus norvegicus GN=Aip PE=1 SV=1	-0.0621762	0.460327	0.771086
Q9Z1N4	BPNT1_RAT	3'(2'),5'-bisphosphate nucleotidase 1 OS=Rattus norvegicus GN=Bpnt1 PE=1 SV=1	0.052978	0.45963	0.771086
Q02293	FNTB_RAT	Protein farnesyltransferase subunit beta OS=Rattus norvegicus GN=Fntb PE=1 SV=1	-0.0804628	0.459031	0.771086
Q5BK81	PTGR2_RAT	Prostaglandin reductase 2 OS=Rattus norvegicus GN=Ptgr2 PE=2 SV=2	0.0437508	0.457166	0.771086
P52873	PYC_RAT	Pyruvate carboxylase, mitochondrial OS=Rattus norvegicus GN=Pc PE=1 SV=2	0.0632438	0.458864	0.771086
P37805	TAGL3_RAT	Transgelin-3 OS=Rattus norvegicus GN=Tagln3 PE=1 SV=2	-0.021778	0.45929	0.771086
P61149	FGF1_RAT	Fibroblast growth factor 1 OS=Rattus norvegicus GN=Fgf1 PE=1 SV=1	-0.208331	0.465745	0.776242
P62271	RS18_RAT	40S ribosomal protein S18 OS=Rattus norvegicus GN=Rps18 PE=1 SV=3	-0.0968378	0.465716	0.776242
Q5XHY5	SYTC_RAT	Threonine--tRNA ligase, cytoplasmic OS=Rattus norvegicus GN=Tars PE=2 SV=1	0.0994243	0.464531	0.776242
P97576	GRPE1_RAT	GrpE protein homolog 1, mitochondrial OS=Rattus norvegicus GN=Grpel1 PE=1 SV=2	0.0813426	0.467848	0.778442
Q80VJ4	GPCP1_RAT	Glycerophosphocholine phosphodiesterase GPCPD1 OS=Rattus norvegicus GN=Gpcpd1 PE=2 SV=1	0.0905525	0.468836	0.778785
O08618	KPRB_RAT	Phosphoribosyl pyrophosphate synthase-associated protein 2 OS=Rattus norvegicus GN=Prpsap2 PE=2 SV=1	0.0635093	0.472428	0.779545
Q924S5	LONM_RAT	Lon protease homolog, mitochondrial OS=Rattus norvegicus GN=Lonp1 PE=2 SV=1	0.068649	0.471719	0.779545
O88794	PNPO_RAT	Pyridoxine-5'-phosphate oxidase OS=Rattus norvegicus GN=Pnpo PE=1 SV=1	-0.125899	0.470276	0.779545
P10362	SCG2_RAT	Secretogranin-2 OS=Rattus norvegicus GN=Scg2 PE=2 SV=1	-0.0512888	0.471235	0.779545
P61203	CSN2_RAT	COP9 signalosome complex subunit 2 OS=Rattus norvegicus GN=Cops2 PE=2 SV=1	0.0363684	0.477208	0.780007
Q9WTP0	E41L1_RAT	Band 4.1-like protein 1 OS=Rattus norvegicus GN=Epb41l1 PE=1 SV=1	0.0353299	0.477412	0.780007
Q68FS3	FBX7_RAT	F-box only protein 7 OS=Rattus norvegicus GN=Fbxo7 PE=2 SV=1	0.0960157	0.475124	0.780007
O35331	PDXK_RAT	Pyridoxal kinase OS=Rattus norvegicus GN=Pdxk PE=1 SV=1	-0.0311412	0.475339	0.780007
P85108	TBB2A_RAT	Tubulin beta-2A chain OS=Rattus norvegicus GN=Tubb2a PE=1 SV=1	0.0530721	0.477093	0.780007
Q3MIE4	VAT1_RAT	Synaptic vesicle membrane protein VAT-1 homolog OS=Rattus norvegicus GN=Vat1 PE=1 SV=1	0.0886141	0.475214	0.780007
Q01066	PDE1B_RAT	Calcium/calmodulin-dependent 3',5'-cyclic nucleotide phosphodiesterase 1B OS=Rattus norvegicus GN=Pde1b PE=2 SV=1	-0.0211423	0.479895	0.781848
Q9WVR7	PPM1F_RAT	Protein phosphatase 1F OS=Rattus norvegicus GN=Ppm1f PE=2 SV=1	0.0503178	0.48011	0.781848
Q66H12	NAGAB_RAT	Alpha-N-acetylgalactosaminidase OS=Rattus norvegicus GN=Naga PE=2 SV=1	-0.106478	0.481608	0.783007
Q62688	PLCL1_RAT	Inactive phospholipase C-like protein 1 OS=Rattus norvegicus GN=Plcl1 PE=1 SV=1	0.0561822	0.483268	0.784424
P05197	EF2_RAT	Elongation factor 2 OS=Rattus norvegicus GN=Eef2 PE=1 SV=4	-0.0157081	0.484842	0.785697
Q5XIE0	AN32E_RAT	Acidic leucine-rich nuclear phosphoprotein 32 family member E OS=Rattus norvegicus GN=Anp32e PE=2 SV=1	0.0963138	0.486147	0.786531
P01026	CO3_RAT	Complement C3 OS=Rattus norvegicus GN=C3 PE=1 SV=3	0.0461278	0.489756	0.787655
Q66HG4	GALM_RAT	Aldose 1-epimerase OS=Rattus norvegicus GN=Galm PE=1 SV=1	0.0744944	0.48994	0.787655
P52631	STAT3_RAT	Signal transducer and activator of transcription 3 OS=Rattus norvegicus GN=Stat3 PE=1 SV=1	0.0619779	0.490008	0.787655
Q6P799	SYSC_RAT	Serine--tRNA ligase, cytoplasmic OS=Rattus norvegicus GN=Sars PE=1 SV=3	0.0405349	0.487875	0.787655
Q5SGE0	LPPRC_RAT	Leucine-rich PPR motif-containing protein, mitochondrial OS=Rattus norvegicus GN=Lrpprc PE=1 SV=1	-0.0666843	0.491993	0.787955
Q5BKC9	NGEF_RAT	Ephexin-1 OS=Rattus norvegicus GN=Ngef PE=1 SV=2	0.0307023	0.495718	0.787955
Q5I6B8	PI51C_RAT	Phosphatidylinositol 4-phosphate 5-kinase type-1 gamma OS=Rattus norvegicus GN=Pip5k1c PE=1 SV=1	0.0384648	0.493851	0.787955
P20651	PP2BB_RAT	Serine/threonine-protein phosphatase 2B catalytic subunit beta isoform OS=Rattus norvegicus GN=Ppp3cb PE=2 SV=1	0.0453711	0.495557	0.787955
Q63486	RRAGA_RAT	Ras-related GTP-binding protein A OS=Rattus norvegicus GN=Rraga PE=1 SV=1	0.114545	0.495738	0.787955
P0DJJ3	SGIP1_RAT	SH3-containing GRB2-like protein 3-interacting protein 1 OS=Rattus norvegicus GN=Sgip1 PE=1 SV=1	0.0400708	0.491232	0.787955
P0C644	VIP1_RAT	Inositol hexakisphosphate and diphosphoinositol-pentakisphosphate kinase 1 OS=Rattus norvegicus GN=Ppip5k1 PE=1 SV=1	0.149334	0.492824	0.787955
Q5RKI1	IF4A2_RAT	Eukaryotic initiation factor 4A-II OS=Rattus norvegicus GN=Eif4a2 PE=1 SV=1	-0.034644	0.499061	0.79197
P85515	ACTZ_RAT	Alpha-centractin OS=Rattus norvegicus GN=Actr1a PE=1 SV=1	-0.0588339	0.502683	0.796448
O35867	NEB1_RAT	Neurabin-1 OS=Rattus norvegicus GN=Ppp1r9a PE=1 SV=1	-0.0664642	0.504268	0.797689
A2VCX1	TIPRL_RAT	TIP41-like protein OS=Rattus norvegicus GN=Tiprl PE=2 SV=1	-0.0594995	0.506161	0.799413
P62628	DLRB1_RAT	Dynein light chain roadblock-type 1 OS=Rattus norvegicus GN=Dynlrb1 PE=1 SV=3	0.0537268	0.511615	0.800349
B0BNA7	EIF3I_RAT	Eukaryotic translation initiation factor 3 subunit I OS=Rattus norvegicus GN=Eif3i PE=2 SV=1	0.0525503	0.507786	0.800349
Q6P6T4	EMAL2_RAT	Echinoderm microtubule-associated protein-like 2 OS=Rattus norvegicus GN=Eml2 PE=1 SV=1	-0.0563712	0.513653	0.800349
Q5BJQ2	FA63A_RAT	Protein FAM63A OS=Rattus norvegicus GN=Fam63a PE=2 SV=1	0.171159	0.509361	0.800349
P51111	HD_RAT	Huntingtin OS=Rattus norvegicus GN=Htt PE=1 SV=1	0.0632865	0.512182	0.800349
Q63945	SET_RAT	Protein SET OS=Rattus norvegicus GN=Set PE=2 SV=2	0.0516618	0.513641	0.800349
Q5XFX0	TAGL2_RAT	Transgelin-2 OS=Rattus norvegicus GN=Tagln2 PE=2 SV=1	0.0954177	0.514017	0.800349
Q5XIM9	TCPB_RAT	T-complex protein 1 subunit beta OS=Rattus norvegicus GN=Cct2 PE=1 SV=3	0.0362754	0.513824	0.800349
P17764	THIL_RAT	Acetyl-CoA acetyltransferase, mitochondrial OS=Rattus norvegicus GN=Acat1 PE=1 SV=1	0.0615609	0.514798	0.800349
P70566	TMOD2_RAT	Tropomodulin-2 OS=Rattus norvegicus GN=Tmod2 PE=1 SV=1	-0.0350984	0.514747	0.800349
P61212	ARL1_RAT	ADP-ribosylation factor-like protein 1 OS=Rattus norvegicus GN=Arl1 PE=1 SV=1	-0.059402	0.515715	0.800525
Q9JHB5	TSNAX_RAT	Translin-associated protein X OS=Rattus norvegicus GN=Tsnax PE=1 SV=1	0.0472398	0.516644	0.800718
Q4QQV8	CHMP5_RAT	Charged multivesicular body protein 5 OS=Rattus norvegicus GN=Chmp5 PE=2 SV=1	-0.0831056	0.51843	0.800991
Q64270	EI2BA_RAT	Translation initiation factor eIF-2B subunit alpha OS=Rattus norvegicus GN=Eif2b1 PE=2 SV=1	-0.0485595	0.518382	0.800991
Q6PST4	ATLA1_RAT	Atlastin-1 OS=Rattus norvegicus GN=Atl1 PE=1 SV=1	-0.0664749	0.523367	0.801155
Q9JIX3	FHIT_RAT	Bis(5'-adenosyl)-triphosphatase OS=Rattus norvegicus GN=Fhit PE=1 SV=1	0.0428006	0.522765	0.801155
P70470	LYPA1_RAT	Acyl-protein thioesterase 1 OS=Rattus norvegicus GN=Lypla1 PE=1 SV=1	0.0963616	0.522549	0.801155
P15146	MTAP2_RAT	Microtubule-associated protein 2 OS=Rattus norvegicus GN=Map2 PE=1 SV=3	0.0318861	0.521217	0.801155
Q62910	SYNJ1_RAT	Synaptojanin-1 OS=Rattus norvegicus GN=Synj1 PE=1 SV=3	-0.0411456	0.52098	0.801155
Q4VSI4	UBP7_RAT	Ubiquitin carboxyl-terminal hydrolase 7 OS=Rattus norvegicus GN=Usp7 PE=1 SV=1	-0.0405166	0.519959	0.801155
P01835	KACB_RAT	Ig kappa chain C region, B allele OS=Rattus norvegicus PE=1 SV=1	0.0629317	0.525047	0.802492
Q5U2Q3	CK054_RAT	Ester hydrolase C11orf54 homolog OS=Rattus norvegicus PE=1 SV=1	0.14839	0.5294	0.80359
Q9WTT6	GUAD_RAT	Guanine deaminase OS=Rattus norvegicus GN=Gda PE=1 SV=1	0.0188837	0.529804	0.80359
P97756	KKCC1_RAT	Calcium/calmodulin-dependent protein kinase kinase 1 OS=Rattus norvegicus GN=Camkk1 PE=1 SV=1	0.0532311	0.527719	0.80359
P63331	PP2AA_RAT	Serine/threonine-protein phosphatase 2A catalytic subunit alpha isoform OS=Rattus norvegicus GN=Ppp2ca PE=1 SV=1	-0.0519121	0.528846	0.80359
P04644	RS17_RAT	40S ribosomal protein S17 OS=Rattus norvegicus GN=Rps17 PE=1 SV=3	0.0603918	0.529667	0.80359
O88350	RBBP9_RAT	Putative hydrolase RBBP9 OS=Rattus norvegicus GN=Rbbp9 PE=1 SV=2	0.0403619	0.534657	0.809717
Q9QYU4	CRYM_RAT	Thiomorpholine-carboxylate dehydrogenase OS=Rattus norvegicus GN=Crym PE=1 SV=1	0.0288119	0.536631	0.811472
Q63041	A1M_RAT	Alpha-1-macroglobulin OS=Rattus norvegicus GN=A1m PE=1 SV=1	0.109475	0.537775	0.811967
P16638	ACLY_RAT	ATP-citrate synthase OS=Rattus norvegicus GN=Acly PE=1 SV=1	0.0292854	0.543042	0.818676
P85970	ARPC2_RAT	Actin-related protein 2/3 complex subunit 2 OS=Rattus norvegicus GN=Arpc2 PE=1 SV=1	-0.0422773	0.550572	0.819118
Q5PPN4	CAH8_RAT	Carbonic anhydrase-related protein OS=Rattus norvegicus GN=Ca8 PE=1 SV=3	-0.0402309	0.547844	0.819118
P63036	DNJA1_RAT	DnaJ homolog subfamily A member 1 OS=Rattus norvegicus GN=Dnaja1 PE=2 SV=1	-0.0635216	0.547512	0.819118
Q9JJ79	DYHC2_RAT	Cytoplasmic dynein 2 heavy chain 1 OS=Rattus norvegicus GN=Dync2h1 PE=1 SV=1	0.0613705	0.545927	0.819118
P62632	EF1A2_RAT	Elongation factor 1-alpha 2 OS=Rattus norvegicus GN=Eef1a2 PE=2 SV=1	-0.0636807	0.546938	0.819118
P59215	GNAO_RAT	Guanine nucleotide-binding protein G(o) subunit alpha OS=Rattus norvegicus GN=Gnao1 PE=1 SV=2	0.0517101	0.550744	0.819118
O88831	KKCC2_RAT	Calcium/calmodulin-dependent protein kinase kinase 2 OS=Rattus norvegicus GN=Camkk2 PE=1 SV=1	0.0610827	0.547865	0.819118
P11762	LEG1_RAT	Galectin-1 OS=Rattus norvegicus GN=Lgals1 PE=1 SV=2	0.0491687	0.55	0.819118
P56558	OGT1_RAT	UDP-N-acetylglucosamine--peptide N-acetylglucosaminyltransferase 110 kDa subunit OS=Rattus norvegicus GN=Ogt PE=1 SV=1	-0.0359801	0.548302	0.819118
P24090	FETUA_RAT	Alpha-2-HS-glycoprotein OS=Rattus norvegicus GN=Ahsg PE=1 SV=2	-0.0676738	0.552464	0.820451
Q4QR85	MEP50_RAT	Methylosome protein 50 OS=Rattus norvegicus GN=Wdr77 PE=1 SV=1	0.0403689	0.555287	0.823414
P06761	GRP78_RAT	78 kDa glucose-regulated protein OS=Rattus norvegicus GN=Hspa5 PE=1 SV=1	-0.0451581	0.559378	0.825789
P63055	PCP4_RAT	Purkinje cell protein 4 OS=Rattus norvegicus GN=Pcp4 PE=1 SV=2	0.0495595	0.559239	0.825789
P14270	PDE4D_RAT	cAMP-specific 3',5'-cyclic phosphodiesterase 4D OS=Rattus norvegicus GN=Pde4d PE=1 SV=4	-0.0459014	0.557722	0.825789
O88600	HSP74_RAT	Heat shock 70 kDa protein 4 OS=Rattus norvegicus GN=Hspa4 PE=1 SV=1	0.0127195	0.560255	0.825857
P18088	DCE1_RAT	Glutamate decarboxylase 1 OS=Rattus norvegicus GN=Gad1 PE=2 SV=1	-0.0504424	0.562613	0.828106
P02793	FRIL1_RAT	Ferritin light chain 1 OS=Rattus norvegicus GN=Ftl1 PE=1 SV=3	-0.0936908	0.56609	0.831994
Q5XI72	IF4H_RAT	Eukaryotic translation initiation factor 4H OS=Rattus norvegicus GN=Eif4h PE=1 SV=1	0.0525474	0.569767	0.834932
P60892	PRPS1_RAT	Ribose-phosphate pyrophosphokinase 1 OS=Rattus norvegicus GN=Prps1 PE=1 SV=2	-0.147054	0.569126	0.834932
O35263	PA1B3_RAT	Platelet-activating factor acetylhydrolase IB subunit gamma OS=Rattus norvegicus GN=Pafah1b3 PE=2 SV=1	0.0506025	0.571256	0.835882
O08557	DDAH1_RAT	N(G),N(G)-dimethylarginine dimethylaminohydrolase 1 OS=Rattus norvegicus GN=Ddah1 PE=1 SV=3	-0.0268867	0.57874	0.836604
Q5MJ12	FXL16_RAT	F-box/LRR-repeat protein 16 OS=Rattus norvegicus GN=Fbxl16 PE=2 SV=1	-0.0666112	0.575729	0.836604
A2RRU1	GYS1_RAT	Glycogen [starch] synthase, muscle OS=Rattus norvegicus GN=Gys1 PE=2 SV=1	0.115738	0.574035	0.836604
Q5I0D5	LHPP_RAT	Phospholysine phosphohistidine inorganic pyrophosphate phosphatase OS=Rattus norvegicus GN=Lhpp PE=2 SV=1	-0.100103	0.575871	0.836604
P41777	NOLC1_RAT	Nucleolar and coiled-body phosphoprotein 1 OS=Rattus norvegicus GN=Nolc1 PE=1 SV=1	-0.0355166	0.577911	0.836604
Q9Z2G8	NP1L1_RAT	Nucleosome assembly protein 1-like 1 OS=Rattus norvegicus GN=Nap1l1 PE=2 SV=1	-0.0377659	0.575398	0.836604
Q566C7	NUDT3_RAT	Diphosphoinositol polyphosphate phosphohydrolase 1 OS=Rattus norvegicus GN=Nudt3 PE=1 SV=1	0.0540377	0.578331	0.836604
Q68FX9	SIR5_RAT	NAD-dependent protein deacylase sirtuin-5, mitochondrial OS=Rattus norvegicus GN=Sirt5 PE=2 SV=1	-0.0403737	0.579534	0.836604
Q5FWT7	UBCP1_RAT	Ubiquitin-like domain-containing CTD phosphatase 1 OS=Rattus norvegicus GN=Ublcp1 PE=2 SV=1	0.0591322	0.580157	0.836604
Q6AY86	VP26A_RAT	Vacuolar protein sorting-associated protein 26A OS=Rattus norvegicus GN=Vps26a PE=2 SV=1	0.0827844	0.579403	0.836604
B0BNA5	COTL1_RAT	Coactosin-like protein OS=Rattus norvegicus GN=Cotl1 PE=1 SV=1	-0.0248353	0.585366	0.842893
P12369	KAP3_RAT	cAMP-dependent protein kinase type II-beta regulatory subunit OS=Rattus norvegicus GN=Prkar2b PE=1 SV=3	0.0406714	0.587069	0.844124
Q4KM73	KCY_RAT	UMP-CMP kinase OS=Rattus norvegicus GN=Cmpk1 PE=1 SV=2	0.0258564	0.591566	0.846919
P49803	RGS7_RAT	Regulator of G-protein signaling 7 OS=Rattus norvegicus GN=Rgs7 PE=2 SV=2	-0.0336668	0.59139	0.846919
Q5EGY4	YKT6_RAT	Synaptobrevin homolog YKT6 OS=Rattus norvegicus GN=Ykt6 PE=1 SV=1	-0.0286993	0.591563	0.846919
P85971	6PGL_RAT	6-phosphogluconolactonase OS=Rattus norvegicus GN=Pgls PE=1 SV=1	-0.0314241	0.607268	0.849138
P12711	ADHX_RAT	Alcohol dehydrogenase class-3 OS=Rattus norvegicus GN=Adh5 PE=1 SV=2	0.0590439	0.595218	0.849138
P48037	ANXA6_RAT	Annexin A6 OS=Rattus norvegicus GN=Anxa6 PE=1 SV=2	0.0437182	0.595507	0.849138
Q8VI04	ASGL1_RAT	Isoaspartyl peptidase/L-asparaginase OS=Rattus norvegicus GN=Asrgl1 PE=1 SV=1	0.0315249	0.613187	0.849138
P27139	CAH2_RAT	Carbonic anhydrase 2 OS=Rattus norvegicus GN=Ca2 PE=1 SV=2	-0.0355859	0.608251	0.849138
Q08163	CAP1_RAT	Adenylyl cyclase-associated protein 1 OS=Rattus norvegicus GN=Cap1 PE=1 SV=3	-0.0230193	0.622611	0.849138
P22734	COMT_RAT	Catechol O-methyltransferase OS=Rattus norvegicus GN=Comt PE=1 SV=2	0.0637139	0.620518	0.849138
P63041	CPLX1_RAT	Complexin-1 OS=Rattus norvegicus GN=Cplx1 PE=1 SV=1	0.0682893	0.620432	0.849138
B5DF89	CUL3_RAT	Cullin-3 OS=Rattus norvegicus GN=Cul3 PE=1 SV=2	0.0318144	0.619026	0.849138
P28023	DCTN1_RAT	Dynactin subunit 1 OS=Rattus norvegicus GN=Dctn1 PE=1 SV=2	0.0356898	0.611104	0.849138
Q9EPB1	DPP2_RAT	Dipeptidyl peptidase 2 OS=Rattus norvegicus GN=Dpp7 PE=1 SV=1	0.0313125	0.622986	0.849138
Q9QVC8	FKBP4_RAT	Peptidyl-prolyl cis-trans isomerase FKBP4 OS=Rattus norvegicus GN=Fkbp4 PE=1 SV=3	-0.0590133	0.599868	0.849138
Q5XI73	GDIR1_RAT	Rho GDP-dissociation inhibitor 1 OS=Rattus norvegicus GN=Arhgdia PE=1 SV=1	-0.0186274	0.61429	0.849138
Q7TP47	HNRPQ_RAT	Heterogeneous nuclear ribonucleoprotein Q OS=Rattus norvegicus GN=Syncrip PE=2 SV=1	0.0593623	0.622537	0.849138
P47860	K6PP_RAT	6-phosphofructokinase type C OS=Rattus norvegicus GN=Pfkp PE=1 SV=2	0.0279058	0.602349	0.849138
Q91Z79	LIPA3_RAT	Liprin-alpha-3 OS=Rattus norvegicus GN=Ppfia3 PE=1 SV=2	-0.0414532	0.604021	0.849138
Q5PQN0	NCALD_RAT	Neurocalcin-delta OS=Rattus norvegicus GN=Ncald PE=1 SV=3	-0.0362761	0.621057	0.849138
P97686	NRCAM_RAT	Neuronal cell adhesion molecule OS=Rattus norvegicus GN=Nrcam PE=1 SV=2	-0.0234368	0.606943	0.849138
Q63525	NUDC_RAT	Nuclear migration protein nudC OS=Rattus norvegicus GN=Nudc PE=1 SV=1	0.0339762	0.613325	0.849138
Q01062	PDE2A_RAT	cGMP-dependent 3',5'-cyclic phosphodiesterase OS=Rattus norvegicus GN=Pde2a PE=1 SV=2	-0.112841	0.604884	0.849138
P07897	PGCA_RAT	Aggrecan core protein OS=Rattus norvegicus GN=Acan PE=1 SV=2	0.0794894	0.622923	0.849138
Q6AYG3	PRUNE_RAT	Protein prune homolog OS=Rattus norvegicus GN=Prune PE=2 SV=1	-0.0310616	0.602348	0.849138
P40307	PSB2_RAT	Proteasome subunit beta type-2 OS=Rattus norvegicus GN=Psmb2 PE=1 SV=1	-0.0317008	0.609944	0.849138
O35567	PUR9_RAT	Bifunctional purine biosynthesis protein PURH OS=Rattus norvegicus GN=Atic PE=1 SV=2	0.0225676	0.61814	0.849138
P50904	RASA1_RAT	Ras GTPase-activating protein 1 OS=Rattus norvegicus GN=Rasa1 PE=3 SV=1	-0.0318074	0.620866	0.849138
Q4KMA2	RD23B_RAT	UV excision repair protein RAD23 homolog B OS=Rattus norvegicus GN=Rad23b PE=1 SV=1	-0.0181702	0.604768	0.849138
P50878	RL4_RAT	60S ribosomal protein L4 OS=Rattus norvegicus GN=Rpl4 PE=1 SV=3	-0.10348	0.613183	0.849138
P86410	RLGPB_RAT	Ral GTPase-activating protein subunit beta OS=Rattus norvegicus GN=Ralgapb PE=1 SV=1	0.0852026	0.615149	0.849138
P54921	SNAA_RAT	Alpha-soluble NSF attachment protein OS=Rattus norvegicus GN=Napa PE=1 SV=2	0.038224	0.595886	0.849138
P70483	STRN_RAT	Striatin OS=Rattus norvegicus GN=Strn PE=1 SV=1	-0.0336578	0.603023	0.849138
P68370	TBA1A_RAT	Tubulin alpha-1A chain OS=Rattus norvegicus GN=Tuba1a PE=1 SV=1	0.0576461	0.622706	0.849138
Q5M7V8	TR150_RAT	Thyroid hormone receptor-associated protein 3 OS=Rattus norvegicus GN=Thrap3 PE=1 SV=1	-0.0730149	0.612716	0.849138
Q5XHZ0	TRAP1_RAT	Heat shock protein 75 kDa, mitochondrial OS=Rattus norvegicus GN=Trap1 PE=1 SV=1	-0.0352907	0.603386	0.849138
Q9JJP9	UBQL1_RAT	Ubiquilin-1 OS=Rattus norvegicus GN=Ubqln1 PE=1 SV=1	0.0373244	0.606928	0.849138
Q5RKI0	WDR1_RAT	WD repeat-containing protein 1 OS=Rattus norvegicus GN=Wdr1 PE=1 SV=3	-0.0173929	0.601296	0.849138
Q5PQN1	HERC4_RAT	Probable E3 ubiquitin-protein ligase HERC4 OS=Rattus norvegicus GN=Herc4 PE=2 SV=1	0.0552291	0.627161	0.851331
P68101	IF2A_RAT	Eukaryotic translation initiation factor 2 subunit 1 OS=Rattus norvegicus GN=Eif2s1 PE=1 SV=2	-0.0353643	0.625658	0.851331
P42676	NEUL_RAT	Neurolysin, mitochondrial OS=Rattus norvegicus GN=Nln PE=1 SV=1	0.0493872	0.626456	0.851331
P06214	HEM2_RAT	Delta-aminolevulinic acid dehydratase OS=Rattus norvegicus GN=Alad PE=1 SV=1	0.0501859	0.628836	0.852347
P22062	PIMT_RAT	Protein-L-isoaspartate(D-aspartate) O-methyltransferase OS=Rattus norvegicus GN=Pcmt1 PE=1 SV=2	0.0361831	0.629623	0.852347
A7VJC2	ROA2_RAT	Heterogeneous nuclear ribonucleoproteins A2/B1 OS=Rattus norvegicus GN=Hnrnpa2b1 PE=1 SV=1	0.0338483	0.634398	0.857645
P27952	RS2_RAT	40S ribosomal protein S2 OS=Rattus norvegicus GN=Rps2 PE=1 SV=1	0.0621894	0.639431	0.863275
P60841	ENSA_RAT	Alpha-endosulfine OS=Rattus norvegicus GN=Ensa PE=1 SV=1	-0.0388631	0.641563	0.864981
Q6DGG1	ABHEB_RAT	Alpha/beta hydrolase domain-containing protein 14B OS=Rattus norvegicus GN=Abhd14b PE=2 SV=1	-0.0330802	0.64732	0.869049
A1L108	ARP5L_RAT	Actin-related protein 2/3 complex subunit 5-like protein OS=Rattus norvegicus GN=Arpc5l PE=1 SV=2	-0.026352	0.650881	0.869049
Q6P7P5	BZW1_RAT	Basic leucine zipper and W2 domain-containing protein 1 OS=Rattus norvegicus GN=Bzw1 PE=2 SV=1	-0.0228389	0.646407	0.869049
Q62952	DPYL3_RAT	Dihydropyrimidinase-related protein 3 OS=Rattus norvegicus GN=Dpysl3 PE=1 SV=2	-0.0312748	0.651461	0.869049
Q62785	HAP28_RAT	28 kDa heat- and acid-stable phosphoprotein OS=Rattus norvegicus GN=Pdap1 PE=1 SV=1	0.0267532	0.646722	0.869049
Q64361	LXN_RAT	Latexin OS=Rattus norvegicus GN=Lxn PE=1 SV=1	0.0693678	0.651568	0.869049
P07936	NEUM_RAT	Neuromodulin OS=Rattus norvegicus GN=Gap43 PE=1 SV=1	0.0650412	0.648776	0.869049
Q5EB77	RAB18_RAT	Ras-related protein Rab-18 OS=Rattus norvegicus GN=Rab18 PE=2 SV=1	-0.0697115	0.649653	0.869049
Q9QXQ0	ACTN4_RAT	Alpha-actinin-4 OS=Rattus norvegicus GN=Actn4 PE=1 SV=2	-0.0181394	0.665805	0.881144
Q63767	BCAR1_RAT	Breast cancer anti-estrogen resistance protein 1 OS=Rattus norvegicus GN=Bcar1 PE=1 SV=1	0.0817655	0.667697	0.881144
Q63768	CRK_RAT	Adapter molecule crk OS=Rattus norvegicus GN=Crk PE=1 SV=1	-0.0408969	0.662384	0.881144
Q68FW9	CSN3_RAT	COP9 signalosome complex subunit 3 OS=Rattus norvegicus GN=Cops3 PE=2 SV=1	0.0639215	0.667301	0.881144
P04041	GPX1_RAT	Glutathione peroxidase 1 OS=Rattus norvegicus GN=Gpx1 PE=1 SV=4	-0.0278923	0.667837	0.881144
P37285	KLC1_RAT	Kinesin light chain 1 OS=Rattus norvegicus GN=Klc1 PE=1 SV=2	-0.0214383	0.668996	0.881144
P63324	RS12_RAT	40S ribosomal protein S12 OS=Rattus norvegicus GN=Rps12 PE=1 SV=2	-0.0740959	0.667214	0.881144
B3GNI6	SEP11_RAT	Septin-11 OS=Rattus norvegicus GN=Sept11 PE=1 SV=1	-0.0514787	0.670152	0.881144
P13668	STMN1_RAT	Stathmin OS=Rattus norvegicus GN=Stmn1 PE=1 SV=2	0.0245462	0.669815	0.881144
Q63754	SYUB_RAT	Beta-synuclein OS=Rattus norvegicus GN=Sncb PE=1 SV=1	-0.0427029	0.665271	0.881144
P50753	TNNT2_RAT	Troponin T, cardiac muscle OS=Rattus norvegicus GN=Tnnt2 PE=1 SV=2	0.0374596	0.670378	0.881144
B2GUZ5	CAZA1_RAT	F-actin-capping protein subunit alpha-1 OS=Rattus norvegicus GN=Capza1 PE=1 SV=1	-0.0301732	0.672287	0.881325
P16617	PGK1_RAT	Phosphoglycerate kinase 1 OS=Rattus norvegicus GN=Pgk1 PE=1 SV=2	-0.0243273	0.671668	0.881325
P40112	PSB3_RAT	Proteasome subunit beta type-3 OS=Rattus norvegicus GN=Psmb3 PE=1 SV=1	0.0522083	0.674515	0.883082
F1LP90	MINK1_RAT	Misshapen-like kinase 1 OS=Rattus norvegicus GN=Mink1 PE=1 SV=2	0.0275575	0.676051	0.88393
P13233	CN37_RAT	2',3'-cyclic-nucleotide 3'-phosphodiesterase OS=Rattus norvegicus GN=Cnp PE=1 SV=2	0.0538371	0.685001	0.889423
Q8R511	FNBP1_RAT	Formin-binding protein 1 OS=Rattus norvegicus GN=Fnbp1 PE=1 SV=2	0.0405365	0.682498	0.889423
P35332	HPCL4_RAT	Hippocalcin-like protein 4 OS=Rattus norvegicus GN=Hpcal4 PE=2 SV=2	-0.0312003	0.685097	0.889423
P42123	LDHB_RAT	L-lactate dehydrogenase B chain OS=Rattus norvegicus GN=Ldhb PE=1 SV=2	-0.0189551	0.685616	0.889423
Q9WTV5	PSMD9_RAT	26S proteasome non-ATPase regulatory subunit 9 OS=Rattus norvegicus GN=Psmd9 PE=1 SV=1	0.0538008	0.684491	0.889423
P53534	PYGB_RAT	Glycogen phosphorylase, brain form (Fragment) OS=Rattus norvegicus GN=Pygb PE=1 SV=3	0.0126135	0.683369	0.889423
P11517	HBB2_RAT	Hemoglobin subunit beta-2 OS=Rattus norvegicus PE=1 SV=2	-0.0632398	0.68733	0.890257
O54975	XPP1_RAT	Xaa-Pro aminopeptidase 1 OS=Rattus norvegicus GN=Xpnpep1 PE=1 SV=1	-0.0122035	0.688048	0.890257
Q6AYC4	CAPG_RAT	Macrophage-capping protein OS=Rattus norvegicus GN=Capg PE=1 SV=1	-0.0415889	0.694126	0.892199
Q63450	KCC1A_RAT	Calcium/calmodulin-dependent protein kinase type 1 OS=Rattus norvegicus GN=Camk1 PE=1 SV=2	0.0259034	0.693384	0.892199
Q01986	MP2K1_RAT	Dual specificity mitogen-activated protein kinase kinase 1 OS=Rattus norvegicus GN=Map2k1 PE=1 SV=2	-0.0218425	0.695825	0.892199
Q80Z30	PPM1E_RAT	Protein phosphatase 1E OS=Rattus norvegicus GN=Ppm1e PE=2 SV=1	-0.0247246	0.694583	0.892199
P63012	RAB3A_RAT	Ras-related protein Rab-3A OS=Rattus norvegicus GN=Rab3a PE=1 SV=1	-0.0248998	0.691523	0.892199
P24050	RS5_RAT	40S ribosomal protein S5 OS=Rattus norvegicus GN=Rps5 PE=1 SV=3	0.0786842	0.693902	0.892199
P69897	TBB5_RAT	Tubulin beta-5 chain OS=Rattus norvegicus GN=Tubb5 PE=1 SV=1	0.0250634	0.695717	0.892199
Q8VBU2	NDRG2_RAT	Protein NDRG2 OS=Rattus norvegicus GN=Ndrg2 PE=1 SV=1	0.0372816	0.700483	0.897015
P04550	PTMS_RAT	Parathymosin OS=Rattus norvegicus GN=Ptms PE=1 SV=2	0.0295802	0.702325	0.898217
P08009	GSTM4_RAT	Glutathione S-transferase Yb-3 OS=Rattus norvegicus GN=Gstm3 PE=1 SV=2	0.0197263	0.705089	0.900596
Q62847	ADDG_RAT	Gamma-adducin OS=Rattus norvegicus GN=Add3 PE=1 SV=2	-0.0278562	0.71209	0.90246
P18484	AP2A2_RAT	AP-2 complex subunit alpha-2 OS=Rattus norvegicus GN=Ap2a2 PE=1 SV=3	-0.0191055	0.712395	0.90246
Q6AZ50	ATG3_RAT	Ubiquitin-like-conjugating enzyme ATG3 OS=Rattus norvegicus GN=Atg3 PE=2 SV=1	0.0436191	0.718469	0.90246
O55156	CLIP2_RAT	CAP-Gly domain-containing linker protein 2 OS=Rattus norvegicus GN=Clip2 PE=1 SV=1	-0.0288651	0.711171	0.90246
Q9JHL4	DBNL_RAT	Drebrin-like protein OS=Rattus norvegicus GN=Dbnl PE=1 SV=1	0.0349186	0.712179	0.90246
Q6MG60	DDAH2_RAT	N(G),N(G)-dimethylarginine dimethylaminohydrolase 2 OS=Rattus norvegicus GN=Ddah2 PE=1 SV=1	-0.0176369	0.716401	0.90246
B0BNE5	ESTD_RAT	S-formylglutathione hydrolase OS=Rattus norvegicus GN=Esd PE=1 SV=1	-0.0380469	0.718643	0.90246
Q62658	FKB1A_RAT	Peptidyl-prolyl cis-trans isomerase FKBP1A OS=Rattus norvegicus GN=Fkbp1a PE=1 SV=3	-0.01972	0.723782	0.90246
P05370	G6PD_RAT	Glucose-6-phosphate 1-dehydrogenase OS=Rattus norvegicus GN=G6pdx PE=1 SV=3	0.0146119	0.718663	0.90246
Q6QLM7	KIF5A_RAT	Kinesin heavy chain isoform 5A OS=Rattus norvegicus GN=Kif5a PE=1 SV=1	0.0551962	0.722723	0.90246
Q68FX1	MPI_RAT	Mannose-6-phosphate isomerase OS=Rattus norvegicus GN=Mpi PE=2 SV=1	-0.0715293	0.723367	0.90246
Q63798	PSME2_RAT	Proteasome activator complex subunit 2 OS=Rattus norvegicus GN=Psme2 PE=2 SV=3	0.0448328	0.714087	0.90246
Q6RUV5	RAC1_RAT	Ras-related C3 botulinum toxin substrate 1 OS=Rattus norvegicus GN=Rac1 PE=1 SV=1	-0.0487348	0.722245	0.90246
P97680	RIN1_RAT	Ras and Rab interactor 1 OS=Rattus norvegicus GN=Rin1 PE=2 SV=2	-0.0502763	0.708959	0.90246
P38983	RSSA_RAT	40S ribosomal protein SA OS=Rattus norvegicus GN=Rpsa PE=1 SV=3	-0.0366471	0.720566	0.90246
Q68FQ0	TCPE_RAT	T-complex protein 1 subunit epsilon OS=Rattus norvegicus GN=Cct5 PE=1 SV=1	0.0219841	0.721009	0.90246
Q64560	TPP2_RAT	Tripeptidyl-peptidase 2 OS=Rattus norvegicus GN=Tpp2 PE=2 SV=3	-0.0254794	0.7166	0.90246
P50408	VATF_RAT	V-type proton ATPase subunit F OS=Rattus norvegicus GN=Atp6v1f PE=1 SV=1	0.0193471	0.713367	0.90246
P31000	VIME_RAT	Vimentin OS=Rattus norvegicus GN=Vim PE=1 SV=2	-0.0223638	0.72043	0.90246
Q711G3	IAH1_RAT	Isoamyl acetate-hydrolyzing esterase 1 homolog OS=Rattus norvegicus GN=Iah1 PE=2 SV=2	-0.0179611	0.726214	0.903351
Q9ESB5	NECA1_RAT	N-terminal EF-hand calcium-binding protein 1 OS=Rattus norvegicus GN=Necab1 PE=1 SV=1	-0.0208174	0.726312	0.903351
Q5RJK8	ACBD6_RAT	Acyl-CoA-binding domain-containing protein 6 OS=Rattus norvegicus GN=Acbd6 PE=2 SV=1	0.023379	0.729863	0.905403
Q3T1J1	IF5A1_RAT	Eukaryotic translation initiation factor 5A-1 OS=Rattus norvegicus GN=Eif5a PE=1 SV=3	0.0237296	0.730183	0.905403
P36506	MP2K2_RAT	Dual specificity mitogen-activated protein kinase kinase 2 OS=Rattus norvegicus GN=Map2k2 PE=2 SV=1	-0.0286316	0.730692	0.905403
Q68FR9	EF1D_RAT	Elongation factor 1-delta OS=Rattus norvegicus GN=Eef1d PE=1 SV=2	-0.0217528	0.731728	0.905559
P55260	ANXA4_RAT	Annexin A4 OS=Rattus norvegicus GN=Anxa4 PE=1 SV=3	-0.0142256	0.733848	0.907055
P05369	FPPS_RAT	Farnesyl pyrophosphate synthase OS=Rattus norvegicus GN=Fdps PE=2 SV=2	-0.0132225	0.739008	0.907719
Q62784	INP4A_RAT	Type I inositol 3,4-bisphosphate 4-phosphatase OS=Rattus norvegicus GN=Inpp4a PE=1 SV=1	-0.0133917	0.739012	0.907719
P34067	PSB4_RAT	Proteasome subunit beta type-4 OS=Rattus norvegicus GN=Psmb4 PE=1 SV=2	-0.0268538	0.738274	0.907719
P62243	RS8_RAT	40S ribosomal protein S8 OS=Rattus norvegicus GN=Rps8 PE=1 SV=2	0.0245038	0.739482	0.907719
Q6TXG9	SFR1_RAT	Swi5-dependent recombination DNA repair protein 1 homolog OS=Rattus norvegicus GN=Sfr1 PE=2 SV=1	0.0377869	0.73986	0.907719
B0BN85	SUGT1_RAT	Suppressor of G2 allele of SKP1 homolog OS=Rattus norvegicus GN=Sugt1 PE=2 SV=1	0.0289169	0.736985	0.907719
P62775	MTPN_RAT	Myotrophin OS=Rattus norvegicus GN=Mtpn PE=1 SV=2	0.0365161	0.743946	0.910488
P19804	NDKB_RAT	Nucleoside diphosphate kinase B OS=Rattus norvegicus GN=Nme2 PE=1 SV=1	0.0350767	0.743237	0.910488
O35987	NSF1C_RAT	NSFL1 cofactor p47 OS=Rattus norvegicus GN=Nsfl1c PE=1 SV=1	0.0267255	0.745633	0.911056
P62250	RS16_RAT	40S ribosomal protein S16 OS=Rattus norvegicus GN=Rps16 PE=1 SV=2	-0.0292573	0.746242	0.911056
B2RZ78	VPS29_RAT	Vacuolar protein sorting-associated protein 29 OS=Rattus norvegicus GN=Vps29 PE=1 SV=2	-0.0237985	0.74779	0.911827
Q4V7C6	GUAA_RAT	GMP synthase [glutamine-hydrolyzing] OS=Rattus norvegicus GN=Gmps PE=1 SV=1	-0.0124418	0.75304	0.917105
Q6AYS7	ACY1A_RAT	Aminoacylase-1A OS=Rattus norvegicus GN=Acy1a PE=1 SV=1	0.0102183	0.755518	0.918999
Q9EST6	AN32B_RAT	Acidic leucine-rich nuclear phosphoprotein 32 family member B OS=Rattus norvegicus GN=Anp32b PE=2 SV=1	-0.0200261	0.758066	0.920971
Q9QXU8	DC1L1_RAT	Cytoplasmic dynein 1 light intermediate chain 1 OS=Rattus norvegicus GN=Dync1li1 PE=1 SV=1	-0.0228099	0.762896	0.923643
O88658	KIF1B_RAT	Kinesin-like protein KIF1B OS=Rattus norvegicus GN=Kif1b PE=1 SV=2	-0.0168309	0.762181	0.923643
Q64548	RTN1_RAT	Reticulon-1 OS=Rattus norvegicus GN=Rtn1 PE=2 SV=1	-0.0450961	0.76305	0.923643
P11497	ACACA_RAT	Acetyl-CoA carboxylase 1 OS=Rattus norvegicus GN=Acaca PE=1 SV=1	0.036242	0.767966	0.9269
P04642	LDHA_RAT	L-lactate dehydrogenase A chain OS=Rattus norvegicus GN=Ldha PE=1 SV=1	-0.017221	0.767382	0.9269
Q04462	SYVC_RAT	Valine--tRNA ligase OS=Rattus norvegicus GN=Vars PE=2 SV=2	0.0197611	0.768535	0.9269
P63018	HSP7C_RAT	Heat shock cognate 71 kDa protein OS=Rattus norvegicus GN=Hspa8 PE=1 SV=1	0.0219545	0.770573	0.928233
P51650	SSDH_RAT	Succinate-semialdehyde dehydrogenase, mitochondrial OS=Rattus norvegicus GN=Aldh5a1 PE=1 SV=2	-0.0253465	0.772846	0.929845
Q6J4I0	PPR1B_RAT	Protein phosphatase 1 regulatory subunit 1B OS=Rattus norvegicus GN=Ppp1r1b PE=2 SV=1	-0.0328567	0.773781	0.929845
P53042	PPP5_RAT	Serine/threonine-protein phosphatase 5 OS=Rattus norvegicus GN=Ppp5c PE=2 SV=1	-0.0176679	0.774732	0.929865
Q5HZA6	PPCEL_RAT	Prolyl endopeptidase-like OS=Rattus norvegicus GN=Prepl PE=2 SV=2	0.0184429	0.777468	0.932025
Q4FZT9	PSMD2_RAT	26S proteasome non-ATPase regulatory subunit 2 OS=Rattus norvegicus GN=Psmd2 PE=2 SV=1	-0.0131994	0.779675	0.933546
P29314	RS9_RAT	40S ribosomal protein S9 OS=Rattus norvegicus GN=Rps9 PE=1 SV=4	-0.0235205	0.781249	0.934306
P53678	AP3M2_RAT	AP-3 complex subunit mu-2 OS=Rattus norvegicus GN=Ap3m2 PE=2 SV=1	-0.0144432	0.78369	0.935493
Q6P4Z6	LCMT1_RAT	Leucine carboxyl methyltransferase 1 OS=Rattus norvegicus GN=Lcmt1 PE=2 SV=1	0.0121238	0.784122	0.935493
P19468	GSH1_RAT	Glutamate--cysteine ligase catalytic subunit OS=Rattus norvegicus GN=Gclc PE=1 SV=2	-0.0211261	0.78824	0.93928
Q9Z272	GIT1_RAT	ARF GTPase-activating protein GIT1 OS=Rattus norvegicus GN=Git1 PE=1 SV=1	-0.0256982	0.78977	0.939978
P63170	DYL1_RAT	Dynein light chain 1, cytoplasmic OS=Rattus norvegicus GN=Dynll1 PE=1 SV=1	0.0272706	0.791683	0.940006
P69735	RB3GP_RAT	Rab3 GTPase-activating protein catalytic subunit (Fragments) OS=Rattus norvegicus GN=Rab3gap1 PE=1 SV=2	-0.0283886	0.791357	0.940006
Q5U2Z3	NP1L4_RAT	Nucleosome assembly protein 1-like 4 OS=Rattus norvegicus GN=Nap1l4 PE=1 SV=1	0.0182034	0.794027	0.941664
B5DFC8	EIF3C_RAT	Eukaryotic translation initiation factor 3 subunit C OS=Rattus norvegicus GN=Eif3c PE=2 SV=1	0.0192545	0.796287	0.943211
Q4FZT2	PPME1_RAT	Protein phosphatase methylesterase 1 OS=Rattus norvegicus GN=Ppme1 PE=1 SV=2	0.0161952	0.797227	0.943211
Q99JD4	CLAP2_RAT	CLIP-associating protein 2 OS=Rattus norvegicus GN=Clasp2 PE=2 SV=1	-0.0250214	0.799985	0.943276
Q99MZ8	LASP1_RAT	LIM and SH3 domain protein 1 OS=Rattus norvegicus GN=Lasp1 PE=1 SV=1	0.0108503	0.799403	0.943276
P62425	RL7A_RAT	60S ribosomal protein L7a OS=Rattus norvegicus GN=Rpl7a PE=1 SV=2	-0.0274699	0.800126	0.943276
Q4KM86	GGACT_RAT	Gamma-glutamylaminecyclotransferase OS=Rattus norvegicus GN=Ggact PE=2 SV=1	0.0294488	0.803322	0.945923
Q4G017	NISCH_RAT	Nischarin OS=Rattus norvegicus GN=Nisch PE=2 SV=2	0.0297805	0.804386	0.946057
P63102	1433Z_RAT	14-3-3 protein zeta/delta OS=Rattus norvegicus GN=Ywhaz PE=1 SV=1	0.0226571	0.808259	0.94646
B0BNN3	CAH1_RAT	Carbonic anhydrase 1 OS=Rattus norvegicus GN=Ca1 PE=1 SV=1	-0.0237598	0.808968	0.94646
P70600	FAK2_RAT	Protein-tyrosine kinase 2-beta OS=Rattus norvegicus GN=Ptk2b PE=1 SV=1	0.0137519	0.810139	0.94646
Q4QQS3	OSCP1_RAT	Protein OSCP1 OS=Rattus norvegicus GN=Oscp1 PE=2 SV=1	0.027848	0.810389	0.94646
B2RYG6	OTUB1_RAT	Ubiquitin thioesterase OTUB1 OS=Rattus norvegicus GN=Otub1 PE=1 SV=1	0.0146968	0.811793	0.94646
P16446	PIPNA_RAT	Phosphatidylinositol transfer protein alpha isoform OS=Rattus norvegicus GN=Pitpna PE=1 SV=2	0.00842562	0.809395	0.94646
P19944	RLA1_RAT	60S acidic ribosomal protein P1 OS=Rattus norvegicus GN=Rplp1 PE=3 SV=1	-0.0360879	0.811993	0.94646
Q9EQX9	UBE2N_RAT	Ubiquitin-conjugating enzyme E2 N OS=Rattus norvegicus GN=Ube2n PE=1 SV=1	0.0118058	0.812338	0.94646
Q6AYK6	CYBP_RAT	Calcyclin-binding protein OS=Rattus norvegicus GN=Cacybp PE=1 SV=1	-0.0202125	0.815221	0.947599
Q62951	DPYL4_RAT	Dihydropyrimidinase-related protein 4 (Fragment) OS=Rattus norvegicus GN=Dpysl4 PE=1 SV=1	-0.0114894	0.814608	0.947599
P35213	1433B_RAT	14-3-3 protein beta/alpha OS=Rattus norvegicus GN=Ywhab PE=1 SV=3	0.00889854	0.816419	0.947884
O35796	C1QBP_RAT	Complement component 1 Q subcomponent-binding protein, mitochondrial OS=Rattus norvegicus GN=C1qbp PE=1 SV=2	0.0449086	0.818135	0.948626
P62850	RS24_RAT	40S ribosomal protein S24 OS=Rattus norvegicus GN=Rps24 PE=2 SV=1	0.025532	0.819918	0.948626
P11232	THIO_RAT	Thioredoxin OS=Rattus norvegicus GN=Txn PE=1 SV=2	-0.0145093	0.819639	0.948626
Q4KLF8	ARPC5_RAT	Actin-related protein 2/3 complex subunit 5 OS=Rattus norvegicus GN=Arpc5 PE=1 SV=3	-0.0168151	0.822797	0.949749
Q6MG06	GNL1_RAT	Guanine nucleotide-binding protein-like 1 OS=Rattus norvegicus GN=Gnl1 PE=2 SV=1	0.017472	0.822262	0.949749
Q6AYZ1	TBA1C_RAT	Tubulin alpha-1C chain OS=Rattus norvegicus GN=Tuba1c PE=1 SV=1	-0.0270049	0.825177	0.951392
Q9JLZ1	GLRX3_RAT	Glutaredoxin-3 OS=Rattus norvegicus GN=Glrx3 PE=1 SV=2	0.0153496	0.826649	0.951986
P04182	OAT_RAT	Ornithine aminotransferase, mitochondrial OS=Rattus norvegicus GN=Oat PE=1 SV=1	-0.0327493	0.828021	0.952463
O35550	RABE1_RAT	Rab GTPase-binding effector protein 1 OS=Rattus norvegicus GN=Rabep1 PE=1 SV=1	-0.0107384	0.830091	0.952642
P24155	THOP1_RAT	Thimet oligopeptidase OS=Rattus norvegicus GN=Thop1 PE=1 SV=4	0.0227893	0.829478	0.952642
Q924N5	ACBG1_RAT	Long-chain-fatty-acid--CoA ligase ACSBG1 OS=Rattus norvegicus GN=Acsbg1 PE=1 SV=1	-0.0185009	0.848761	0.953531
Q63028	ADDA_RAT	Alpha-adducin OS=Rattus norvegicus GN=Add1 PE=2 SV=2	-0.0109399	0.846252	0.953531
Q05140	AP180_RAT	Clathrin coat assembly protein AP180 OS=Rattus norvegicus GN=Snap91 PE=1 SV=1	0.0141941	0.849912	0.953531
P62744	AP2S1_RAT	AP-2 complex subunit sigma OS=Rattus norvegicus GN=Ap2s1 PE=2 SV=1	-0.0151324	0.840385	0.953531
P29066	ARRB1_RAT	Beta-arrestin-1 OS=Rattus norvegicus GN=Arrb1 PE=1 SV=1	-0.0112861	0.851208	0.953531
P49088	ASNS_RAT	Asparagine synthetase [glutamine-hydrolyzing] OS=Rattus norvegicus GN=Asns PE=2 SV=3	0.0128299	0.850691	0.953531
B2RYM5	BRCC3_RAT	Lys-63-specific deubiquitinase BRCC36 OS=Rattus norvegicus GN=Brcc3 PE=2 SV=1	0.0246124	0.832364	0.953531
P04762	CATA_RAT	Catalase OS=Rattus norvegicus GN=Cat PE=1 SV=3	0.0209032	0.840381	0.953531
Q5U2U2	CRKL_RAT	Crk-like protein OS=Rattus norvegicus GN=Crkl PE=1 SV=1	-0.0163818	0.841503	0.953531
Q62698	DC1L2_RAT	Cytoplasmic dynein 1 light intermediate chain 2 OS=Rattus norvegicus GN=Dync1li2 PE=1 SV=1	0.0180886	0.851647	0.953531
Q9JJ50	HGS_RAT	Hepatocyte growth factor-regulated tyrosine kinase substrate OS=Rattus norvegicus GN=Hgs PE=1 SV=1	0.0310321	0.845461	0.953531
Q9QYL8	LYPA2_RAT	Acyl-protein thioesterase 2 OS=Rattus norvegicus GN=Lypla2 PE=1 SV=1	-0.020336	0.845137	0.953531
O08873	MADD_RAT	MAP kinase-activating death domain protein OS=Rattus norvegicus GN=Madd PE=1 SV=1	0.0208742	0.840662	0.953531
P30904	MIF_RAT	Macrophage migration inhibitory factor OS=Rattus norvegicus GN=Mif PE=1 SV=4	-0.0279842	0.834812	0.953531
O55173	PDPK1_RAT	3-phosphoinositide-dependent protein kinase 1 OS=Rattus norvegicus GN=Pdpk1 PE=1 SV=2	-0.0109868	0.852567	0.953531
Q5U2N3	PITM1_RAT	Membrane-associated phosphatidylinositol transfer protein 1 OS=Rattus norvegicus GN=Pitpnm1 PE=2 SV=1	0.0211412	0.839579	0.953531
Q63716	PRDX1_RAT	Peroxiredoxin-1 OS=Rattus norvegicus GN=Prdx1 PE=1 SV=1	0.0107537	0.852907	0.953531
P06302	PTMA_RAT	Prothymosin alpha OS=Rattus norvegicus GN=Ptma PE=1 SV=2	-0.0215171	0.850722	0.953531
Q920A6	RISC_RAT	Retinoid-inducible serine carboxypeptidase OS=Rattus norvegicus GN=Scpep1 PE=2 SV=1	0.0222367	0.846213	0.953531
Q5RJZ6	SCOC_RAT	Short coiled-coil protein OS=Rattus norvegicus GN=Scoc PE=2 SV=1	0.0250529	0.833804	0.953531
O08629	TIF1B_RAT	Transcription intermediary factor 1-beta OS=Rattus norvegicus GN=Trim28 PE=1 SV=2	0.0116775	0.83657	0.953531
P04692	TPM1_RAT	Tropomyosin alpha-1 chain OS=Rattus norvegicus GN=Tpm1 PE=1 SV=3	0.0146569	0.843653	0.953531
Q99MI7	UBA3_RAT	NEDD8-activating enzyme E1 catalytic subunit OS=Rattus norvegicus GN=Uba3 PE=1 SV=1	-0.0092987	0.839832	0.953531
P47971	NPTX1_RAT	Neuronal pentraxin-1 OS=Rattus norvegicus GN=Nptx1 PE=1 SV=1	-0.0158092	0.856493	0.956466
Q5I034	CL043_RAT	Uncharacterized protein C12orf43 homolog OS=Rattus norvegicus PE=2 SV=1	-0.0131191	0.860836	0.958089
Q76EQ0	SRR_RAT	Serine racemase OS=Rattus norvegicus GN=Srr PE=1 SV=1	-0.00974811	0.860659	0.958089
P62815	VATB2_RAT	V-type proton ATPase subunit B, brain isoform OS=Rattus norvegicus GN=Atp6v1b2 PE=1 SV=1	-0.0120378	0.859905	0.958089
Q6AYT5	CF211_RAT	UPF0364 protein C6orf211 homolog OS=Rattus norvegicus PE=2 SV=1	0.0145656	0.863046	0.958405
F1LP64	TRIPC_RAT	E3 ubiquitin-protein ligase TRIP12 OS=Rattus norvegicus GN=Trip12 PE=2 SV=1	-0.0186517	0.862915	0.958405
Q9QYU1	PEX19_RAT	Peroxisomal biogenesis factor 19 OS=Rattus norvegicus GN=Pex19 PE=2 SV=1	0.0146984	0.866234	0.960873
P52296	IMB1_RAT	Importin subunit beta-1 OS=Rattus norvegicus GN=Kpnb1 PE=1 SV=1	0.00276755	0.868119	0.961892
P20650	PPM1A_RAT	Protein phosphatase 1A OS=Rattus norvegicus GN=Ppm1a PE=1 SV=1	-0.00772	0.869146	0.961958
P00787	CATB_RAT	Cathepsin B OS=Rattus norvegicus GN=Ctsb PE=1 SV=2	-0.0107487	0.89027	0.963737
Q9Z0W7	CLIC4_RAT	Chloride intracellular channel protein 4 OS=Rattus norvegicus GN=Clic4 PE=1 SV=3	0.0331171	0.878147	0.963737
Q4AEF8	COPG1_RAT	Coatomer subunit gamma-1 OS=Rattus norvegicus GN=Copg1 PE=2 SV=1	-0.0190164	0.888602	0.963737
Q6Q0N0	CSTN1_RAT	Calsyntenin-1 OS=Rattus norvegicus GN=Clstn1 PE=2 SV=1	-0.0178997	0.894968	0.963737
Q9Z2F5	CTBP1_RAT	C-terminal-binding protein 1 OS=Rattus norvegicus GN=Ctbp1 PE=1 SV=3	-0.00807767	0.885188	0.963737
O35303	DNM1L_RAT	Dynamin-1-like protein OS=Rattus norvegicus GN=Dnm1l PE=1 SV=1	-0.00533855	0.893637	0.963737
P38650	DYHC1_RAT	Cytoplasmic dynein 1 heavy chain 1 OS=Rattus norvegicus GN=Dync1h1 PE=1 SV=1	0.00862052	0.876655	0.963737
P08010	GSTM2_RAT	Glutathione S-transferase Mu 2 OS=Rattus norvegicus GN=Gstm2 PE=1 SV=2	0.0142197	0.892517	0.963737
Q08415	KAT1_RAT	Kynurenine--oxoglutarate transaminase 1, mitochondrial OS=Rattus norvegicus GN=Ccbl1 PE=1 SV=1	0.0194186	0.872511	0.963737
P30349	LKHA4_RAT	Leukotriene A-4 hydrolase OS=Rattus norvegicus GN=Lta4h PE=2 SV=2	0.00627887	0.880747	0.963737
Q7TQ94	NIT1_RAT	Nitrilase homolog 1 OS=Rattus norvegicus GN=Nit1 PE=2 SV=1	-0.0275221	0.891624	0.963737
Q63604	NTRK2_RAT	BDNF/NT-3 growth factors receptor OS=Rattus norvegicus GN=Ntrk2 PE=1 SV=1	0.0211485	0.888963	0.963737
Q9QXY4	OGFR_RAT	Opioid growth factor receptor OS=Rattus norvegicus GN=Ogfr PE=2 SV=1	0.00964222	0.894795	0.963737
Q6P686	OSTF1_RAT	Osteoclast-stimulating factor 1 OS=Rattus norvegicus GN=Ostf1 PE=2 SV=1	-0.0214078	0.88774	0.963737
Q9QXU9	PCSK1_RAT	ProSAAS OS=Rattus norvegicus GN=Pcsk1n PE=1 SV=1	-0.0149743	0.884961	0.963737
Q5M827	PIR_RAT	Pirin OS=Rattus norvegicus GN=Pir PE=1 SV=1	0.015942	0.892444	0.963737
P62193	PRS4_RAT	26S protease regulatory subunit 4 OS=Rattus norvegicus GN=Psmc1 PE=2 SV=1	0.012844	0.876005	0.963737
P86252	PURA_RAT	Transcriptional activator protein Pur-alpha (Fragments) OS=Rattus norvegicus GN=Pura PE=1 SV=1	0.0112601	0.874158	0.963737
P13471	RS14_RAT	40S ribosomal protein S14 OS=Rattus norvegicus GN=Rps14 PE=2 SV=3	0.0214681	0.877548	0.963737
P35467	S10A1_RAT	Protein S100-A1 OS=Rattus norvegicus GN=S100a1 PE=1 SV=3	0.0157716	0.882604	0.963737
Q63537	SYN2_RAT	Synapsin-2 OS=Rattus norvegicus GN=Syn2 PE=1 SV=1	-0.0132862	0.879324	0.963737
Q4QRB4	TBB3_RAT	Tubulin beta-3 chain OS=Rattus norvegicus GN=Tubb3 PE=1 SV=1	0.0100726	0.894019	0.963737
Q6P7A2	UBE4A_RAT	Ubiquitin conjugation factor E4 A OS=Rattus norvegicus GN=Ube4a PE=2 SV=1	0.016881	0.891947	0.963737
Q9R085	UBP15_RAT	Ubiquitin carboxyl-terminal hydrolase 15 OS=Rattus norvegicus GN=Usp15 PE=1 SV=1	0.0123358	0.882425	0.963737
Q793F9	VPS4A_RAT	Vacuolar protein sorting-associated protein 4A OS=Rattus norvegicus GN=Vps4a PE=2 SV=1	-0.00896073	0.886467	0.963737
Q587K4	LRC73_RAT	Leucine-rich repeat-containing protein 73 OS=Rattus norvegicus GN=Lrrc73 PE=2 SV=1	-0.0177458	0.897039	0.964923
Q99PD4	ARC1A_RAT	Actin-related protein 2/3 complex subunit 1A OS=Rattus norvegicus GN=Arpc1a PE=2 SV=1	0.00469713	0.900327	0.966371
P00762	TRY1_RAT	Anionic trypsin-1 OS=Rattus norvegicus GN=Prss1 PE=1 SV=1	-0.0572834	0.899372	0.966371
Q1M168	ATCAY_RAT	Caytaxin OS=Rattus norvegicus GN=Atcay PE=1 SV=1	-0.0139328	0.903439	0.966703
Q6IRK9	CBPQ_RAT	Carboxypeptidase Q OS=Rattus norvegicus GN=Cpq PE=1 SV=1	0.0125052	0.905458	0.966703
P05371	CLUS_RAT	Clusterin OS=Rattus norvegicus GN=Clu PE=1 SV=2	-0.00871054	0.908003	0.966703
O35828	CORO7_RAT	Coronin-7 (Fragment) OS=Rattus norvegicus GN=Coro7 PE=2 SV=1	0.0125794	0.901789	0.966703
P19132	FRIH_RAT	Ferritin heavy chain OS=Rattus norvegicus GN=Fth1 PE=1 SV=3	0.0141065	0.907097	0.966703
Q5U2R0	MAT2B_RAT	Methionine adenosyltransferase 2 subunit beta OS=Rattus norvegicus GN=Mat2b PE=2 SV=1	-0.00674638	0.903678	0.966703
Q4G009	MCTS1_RAT	Malignant T-cell-amplified sequence 1 OS=Rattus norvegicus GN=Mcts1 PE=2 SV=1	0.0104733	0.908409	0.966703
P09527	RAB7A_RAT	Ras-related protein Rab-7a OS=Rattus norvegicus GN=Rab7a PE=1 SV=2	0.00729727	0.90769	0.966703
Q80W92	VAC14_RAT	Protein VAC14 homolog OS=Rattus norvegicus GN=Vac14 PE=1 SV=1	-0.0108703	0.912512	0.970031
Q9ESH6	GLRX1_RAT	Glutaredoxin-1 OS=Rattus norvegicus GN=Glrx PE=3 SV=3	0.00649072	0.917047	0.972218
P62246	RS15A_RAT	40S ribosomal protein S15a OS=Rattus norvegicus GN=Rps15a PE=1 SV=2	0.013549	0.9175	0.972218
Q4KM92	TRUA_RAT	tRNA pseudouridine synthase A, mitochondrial OS=Rattus norvegicus GN=Pus1 PE=2 SV=2	0.00987188	0.916424	0.972218
P49242	RS3A_RAT	40S ribosomal protein S3a OS=Rattus norvegicus GN=Rps3a PE=1 SV=2	-0.0102608	0.920085	0.97392
O55096	DPP3_RAT	Dipeptidyl peptidase 3 OS=Rattus norvegicus GN=Dpp3 PE=1 SV=2	0.00746335	0.921807	0.974705
Q8VIF7	SBP1_RAT	Selenium-binding protein 1 OS=Rattus norvegicus GN=Selenbp1 PE=1 SV=1	0.00370389	0.92786	0.980064
Q64537	CPNS1_RAT	Calpain small subunit 1 OS=Rattus norvegicus GN=Capns1 PE=1 SV=3	-0.01001	0.929613	0.980627
P68182	KAPCB_RAT	cAMP-dependent protein kinase catalytic subunit beta OS=Rattus norvegicus GN=Prkacb PE=1 SV=2	0.00901773	0.930364	0.980627
Q5QJC9	BAG5_RAT	BAG family molecular chaperone regulator 5 OS=Rattus norvegicus GN=Bag5 PE=1 SV=1	-0.00951098	0.932867	0.980655
P14841	CYTC_RAT	Cystatin-C OS=Rattus norvegicus GN=Cst3 PE=1 SV=2	-0.00649279	0.933125	0.980655
Q8K1Q0	NMT1_RAT	Glycylpeptide N-tetradecanoyltransferase 1 OS=Rattus norvegicus GN=Nmt1 PE=2 SV=1	0.0109106	0.933347	0.980655
P85968	6PGD_RAT	6-phosphogluconate dehydrogenase, decarboxylating OS=Rattus norvegicus GN=Pgd PE=1 SV=1	-0.00389928	0.943409	0.984133
Q9R1T1	BAF_RAT	Barrier-to-autointegration factor OS=Rattus norvegicus GN=Banf1 PE=1 SV=1	-0.011096	0.941119	0.984133
Q62871	DC1I2_RAT	Cytoplasmic dynein 1 intermediate chain 2 OS=Rattus norvegicus GN=Dync1i2 PE=1 SV=1	0.0120866	0.9448	0.984133
P10860	DHE3_RAT	Glutamate dehydrogenase 1, mitochondrial OS=Rattus norvegicus GN=Glud1 PE=1 SV=2	0.010646	0.943078	0.984133
Q6IMX7	HPBP1_RAT	Hsp70-binding protein 1 OS=Rattus norvegicus GN=Hspbp1 PE=2 SV=1	-0.00434312	0.943205	0.984133
Q68FX0	IDH3B_RAT	Isocitrate dehydrogenase [NAD] subunit beta, mitochondrial OS=Rattus norvegicus GN=Idh3B PE=1 SV=1	-0.00594067	0.946548	0.984133
P12007	IVD_RAT	Isovaleryl-CoA dehydrogenase, mitochondrial OS=Rattus norvegicus GN=Ivd PE=1 SV=2	0.00687145	0.944782	0.984133
P15205	MAP1B_RAT	Microtubule-associated protein 1B OS=Rattus norvegicus GN=Map1b PE=1 SV=2	-0.00638149	0.941528	0.984133
B0BN93	PSD13_RAT	26S proteasome non-ATPase regulatory subunit 13 OS=Rattus norvegicus GN=Psmd13 PE=1 SV=1	0.00962323	0.941515	0.984133
B2GV06	SCOT1_RAT	Succinyl-CoA:3-ketoacid coenzyme A transferase 1, mitochondrial OS=Rattus norvegicus GN=Oxct1 PE=1 SV=1	-0.00629927	0.94611	0.984133
Q07936	ANXA2_RAT	Annexin A2 OS=Rattus norvegicus GN=Anxa2 PE=1 SV=2	0.00501892	0.951198	0.984851
P37397	CNN3_RAT	Calponin-3 OS=Rattus norvegicus GN=Cnn3 PE=1 SV=1	-0.00757669	0.949068	0.984851
P62882	GBB5_RAT	Guanine nucleotide-binding protein subunit beta-5 OS=Rattus norvegicus GN=Gnb5 PE=2 SV=1	0.00649519	0.950853	0.984851
Q80U96	XPO1_RAT	Exportin-1 OS=Rattus norvegicus GN=Xpo1 PE=1 SV=1	0.00180983	0.950397	0.984851
P63086	MK01_RAT	Mitogen-activated protein kinase 1 OS=Rattus norvegicus GN=Mapk1 PE=1 SV=3	0.00283459	0.953155	0.985851
Q99N27	SNX1_RAT	Sorting nexin-1 OS=Rattus norvegicus GN=Snx1 PE=1 SV=1	0.00336662	0.955176	0.986916
P11030	ACBP_RAT	Acyl-CoA-binding protein OS=Rattus norvegicus GN=Dbi PE=1 SV=3	-0.00257935	0.96972	0.987525
P10719	ATPB_RAT	ATP synthase subunit beta, mitochondrial OS=Rattus norvegicus GN=Atp5b PE=1 SV=2	0.00531943	0.965065	0.987525
Q8K3E7	DPY30_RAT	Protein dpy-30 homolog OS=Rattus norvegicus GN=Dpy30 PE=1 SV=1	0.00631151	0.965259	0.987525
Q2PQA9	KINH_RAT	Kinesin-1 heavy chain OS=Rattus norvegicus GN=Kif5b PE=1 SV=1	0.00294921	0.962511	0.987525
P34926	MAP1A_RAT	Microtubule-associated protein 1A OS=Rattus norvegicus GN=Map1a PE=1 SV=1	-0.00325553	0.968182	0.987525
P20069	MPPA_RAT	Mitochondrial-processing peptidase subunit alpha OS=Rattus norvegicus GN=Pmpca PE=1 SV=1	0.00403286	0.974087	0.987525
Q10728	MYPT1_RAT	Protein phosphatase 1 regulatory subunit 12A OS=Rattus norvegicus GN=Ppp1r12a PE=1 SV=2	0.00512917	0.960713	0.987525
Q8VIJ5	NCOAT_RAT	Bifunctional protein NCOAT OS=Rattus norvegicus GN=Mgea5 PE=1 SV=1	0.00304591	0.96692	0.987525
P62168	NCS1_RAT	Neuronal calcium sensor 1 OS=Rattus norvegicus GN=Ncs1 PE=1 SV=2	-0.00364255	0.959652	0.987525
D4AAT7	NNRD_RAT	ATP-dependent (S)-NAD(P)H-hydrate dehydratase OS=Rattus norvegicus GN=Carkd PE=2 SV=1	-0.00402971	0.970882	0.987525
Q9Z0W5	PACN1_RAT	Protein kinase C and casein kinase substrate in neurons protein 1 OS=Rattus norvegicus GN=Pacsin1 PE=1 SV=1	-0.00214562	0.971514	0.987525
Q6AXQ5	PDE12_RAT	2',5'-phosphodiesterase 12 OS=Rattus norvegicus GN=Pde12 PE=2 SV=1	-0.00439902	0.964161	0.987525
P62142	PP1B_RAT	Serine/threonine-protein phosphatase PP1-beta catalytic subunit OS=Rattus norvegicus GN=Ppp1cb PE=1 SV=3	-0.00447504	0.974623	0.987525
Q5HZV9	PP1R7_RAT	Protein phosphatase 1 regulatory subunit 7 OS=Rattus norvegicus GN=Ppp1r7 PE=1 SV=1	-0.00140317	0.957254	0.987525
P18422	PSA3_RAT	Proteasome subunit alpha type-3 OS=Rattus norvegicus GN=Psma3 PE=1 SV=3	0.00263017	0.971229	0.987525
P63164	RSMN_RAT	Small nuclear ribonucleoprotein-associated protein N OS=Rattus norvegicus GN=Snrpn PE=2 SV=1	0.00681065	0.959414	0.987525
O70277	TRIM3_RAT	Tripartite motif-containing protein 3 OS=Rattus norvegicus GN=Trim3 PE=1 SV=1	-0.00405853	0.969962	0.987525
B2GUZ1	UBP4_RAT	Ubiquitin carboxyl-terminal hydrolase 4 OS=Rattus norvegicus GN=Usp4 PE=1 SV=1	0.00812267	0.973988	0.987525
P62762	VISL1_RAT	Visinin-like protein 1 OS=Rattus norvegicus GN=Vsnl1 PE=1 SV=2	-0.00241643	0.971877	0.987525
P18297	SPRE_RAT	Sepiapterin reductase OS=Rattus norvegicus GN=Spr PE=1 SV=1	-0.00340496	0.97752	0.989453
Q63622	DLG2_RAT	Disks large homolog 2 OS=Rattus norvegicus GN=Dlg2 PE=1 SV=1	0.0022546	0.982725	0.990062
Q80Z29	NAMPT_RAT	Nicotinamide phosphoribosyltransferase OS=Rattus norvegicus GN=Nampt PE=1 SV=1	-0.00128057	0.982597	0.990062
Q9QUL6	NSF_RAT	Vesicle-fusing ATPase OS=Rattus norvegicus GN=Nsf PE=1 SV=1	-0.00163358	0.983097	0.990062
Q9R063	PRDX5_RAT	Peroxiredoxin-5, mitochondrial OS=Rattus norvegicus GN=Prdx5 PE=1 SV=1	-0.00198362	0.979133	0.990062
O08773	RGS14_RAT	Regulator of G-protein signaling 14 OS=Rattus norvegicus GN=Rgs14 PE=1 SV=1	-0.00245497	0.98144	0.990062
Q03114	CDK5_RAT	Cyclin-dependent kinase 5 OS=Rattus norvegicus GN=Cdk5 PE=1 SV=1	-0.00114472	0.986548	0.992533
Q56AP7	CRBN_RAT	Protein cereblon OS=Rattus norvegicus GN=Crbn PE=1 SV=1	0.00137996	0.98758	0.992568
Q66H80	COPD_RAT	Coatomer subunit delta OS=Rattus norvegicus GN=Arcn1 PE=2 SV=1	-0.000885166	0.991628	0.993375
B0BND0	ENPP6_RAT	Ectonucleotide pyrophosphatase/phosphodiesterase family member 6 OS=Rattus norvegicus GN=Enpp6 PE=2 SV=1	-0.00165126	0.992133	0.993375
P31044	PEBP1_RAT	Phosphatidylethanolamine-binding protein 1 OS=Rattus norvegicus GN=Pebp1 PE=1 SV=3	0.000442851	0.993375	0.993375
O35509	RB11B_RAT	Ras-related protein Rab-11B OS=Rattus norvegicus GN=Rab11b PE=2 SV=4	-0.000966725	0.989388	0.993375
P40329	SYRC_RAT	Arginine--tRNA ligase, cytoplasmic OS=Rattus norvegicus GN=Rars PE=1 SV=2	-0.000839369	0.993183	0.993375

## Sheet: Rat Mitochondria Enriched
Entry	Entry Name	Description	Log2(DJ-1 KO/WT)	Raw P Value	BH Adjusted P Value
O88767	PARK7_RAT	Protein DJ-1 OS=Rattus norvegicus GN=Park7 PE=1 SV=1	-2.2378	1.00677e-13	9.64486e-11
P09606	GLNA_RAT	Glutamine synthetase OS=Rattus norvegicus GN=Glul PE=1 SV=3	-0.292285	3.08401e-05	0.0147724
P23928	CRYAB_RAT	Alpha-crystallin B chain OS=Rattus norvegicus GN=Cryab PE=1 SV=1	-0.97816	5.58657e-05	0.0178398
P25113	PGAM1_RAT	Phosphoglycerate mutase 1 OS=Rattus norvegicus GN=Pgam1 PE=1 SV=4	-0.144242	0.000282352	0.0676233
Q6P7Q4	LGUL_RAT	Lactoylglutathione lyase OS=Rattus norvegicus GN=Glo1 PE=1 SV=3	0.186335	0.000599252	0.0987918
O08651	SERA_RAT	D-3-phosphoglycerate dehydrogenase OS=Rattus norvegicus GN=Phgdh PE=1 SV=3	-0.432619	0.000618738	0.0987918
P07335	KCRB_RAT	Creatine kinase B-type OS=Rattus norvegicus GN=Ckb PE=1 SV=2	-0.122991	0.000794502	0.108733
P50442	GATM_RAT	Glycine amidinotransferase, mitochondrial OS=Rattus norvegicus GN=Gatm PE=1 SV=1	-0.379051	0.00138415	0.165752
P11442	CLH1_RAT	Clathrin heavy chain 1 OS=Rattus norvegicus GN=Cltc PE=1 SV=3	-0.119484	0.00157311	0.167448
P97686	NRCAM_RAT	Neuronal cell adhesion molecule OS=Rattus norvegicus GN=Nrcam PE=1 SV=2	0.209086	0.0018821	0.168321
P08081	CLCA_RAT	Clathrin light chain A OS=Rattus norvegicus GN=Clta PE=1 SV=1	-0.117937	0.00193271	0.168321
P25809	KCRU_RAT	Creatine kinase U-type, mitochondrial OS=Rattus norvegicus GN=Ckmt1 PE=1 SV=1	-0.21138	0.002461	0.19647
Q64428	ECHA_RAT	Trifunctional enzyme subunit alpha, mitochondrial OS=Rattus norvegicus GN=Hadha PE=1 SV=2	0.213546	0.00283218	0.20871
Q5I0K5	ABHDA_RAT	Mycophenolic acid acyl-glucuronide esterase, mitochondrial OS=Rattus norvegicus GN=Abhd10 PE=1 SV=2	0.346608	0.00700374	0.32134
P13221	AATC_RAT	Aspartate aminotransferase, cytoplasmic OS=Rattus norvegicus GN=Got1 PE=1 SV=3	0.160592	0.00723661	0.32134
P07323	ENOG_RAT	Gamma-enolase OS=Rattus norvegicus GN=Eno2 PE=1 SV=2	0.109822	0.00626998	0.32134
P16638	ACLY_RAT	ATP-citrate synthase OS=Rattus norvegicus GN=Acly PE=1 SV=1	-0.0970051	0.00737941	0.32134
Q00981	UCHL1_RAT	Ubiquitin carboxyl-terminal hydrolase isozyme L1 OS=Rattus norvegicus GN=Uchl1 PE=1 SV=2	-0.0993248	0.00711466	0.32134
P84076	HPCA_RAT	Neuron-specific calcium-binding protein hippocalcin OS=Rattus norvegicus GN=Hpca PE=1 SV=2	-0.213185	0.00701362	0.32134
A8WCF8	TPRGL_RAT	Tumor protein p63-regulated gene 1-like protein OS=Rattus norvegicus GN=Tprg1l PE=1 SV=1	-0.230542	0.00653951	0.32134
P14668	ANXA5_RAT	Annexin A5 OS=Rattus norvegicus GN=Anxa5 PE=1 SV=3	-0.232472	0.00521199	0.32134
P21775	THIKA_RAT	3-ketoacyl-CoA thiolase A, peroxisomal OS=Rattus norvegicus GN=Acaa1a PE=2 SV=2	-0.528224	0.00493576	0.32134
P04177	TY3H_RAT	Tyrosine 3-monooxygenase OS=Rattus norvegicus GN=Th PE=1 SV=3	0.19843	0.0110137	0.325027
Q66HF8	AL1B1_RAT	Aldehyde dehydrogenase X, mitochondrial OS=Rattus norvegicus GN=Aldh1b1 PE=1 SV=1	0.153112	0.00791095	0.325027
P31596	EAA2_RAT	Excitatory amino acid transporter 2 OS=Rattus norvegicus GN=Slc1a2 PE=1 SV=2	0.149098	0.0111961	0.325027
P48500	TPIS_RAT	Triosephosphate isomerase OS=Rattus norvegicus GN=Tpi1 PE=1 SV=2	0.141734	0.00870123	0.325027
Q2TA68	OPA1_RAT	Dynamin-like 120 kDa protein, mitochondrial OS=Rattus norvegicus GN=Opa1 PE=1 SV=1	0.139612	0.00870001	0.325027
P60881	SNP25_RAT	Synaptosomal-associated protein 25 OS=Rattus norvegicus GN=Snap25 PE=1 SV=1	-0.107102	0.0104915	0.325027
Q5SGE0	LPPRC_RAT	Leucine-rich PPR motif-containing protein, mitochondrial OS=Rattus norvegicus GN=Lrpprc PE=1 SV=1	-0.139582	0.0106605	0.325027
P04905	GSTM1_RAT	Glutathione S-transferase Mu 1 OS=Rattus norvegicus GN=Gstm1 PE=1 SV=2	-0.26275	0.0104782	0.325027
Q9QUH6	SYGP1_RAT	Ras GTPase-activating protein SynGAP OS=Rattus norvegicus GN=Syngap1 PE=1 SV=2	-0.288349	0.0106872	0.325027
P39069	KAD1_RAT	Adenylate kinase isoenzyme 1 OS=Rattus norvegicus GN=Ak1 PE=1 SV=3	-0.602102	0.00927285	0.325027
P02770	ALBU_RAT	Serum albumin OS=Rattus norvegicus GN=Alb PE=1 SV=2	-0.604734	0.0108769	0.325027
Q52KK3	S2551_RAT	Solute carrier family 25 member 51 OS=Rattus norvegicus GN=Slc25a51 PE=2 SV=1	0.109692	0.0121281	0.327217
P53534	PYGB_RAT	Glycogen phosphorylase, brain form (Fragment) OS=Rattus norvegicus GN=Pygb PE=1 SV=3	-0.0887743	0.0117823	0.327217
P06686	AT1A2_RAT	Sodium/potassium-transporting ATPase subunit alpha-2 OS=Rattus norvegicus GN=Atp1a2 PE=1 SV=1	-0.140993	0.0122963	0.327217
P29147	BDH_RAT	D-beta-hydroxybutyrate dehydrogenase, mitochondrial OS=Rattus norvegicus GN=Bdh1 PE=1 SV=2	0.211843	0.0132743	0.334653
P07340	AT1B1_RAT	Sodium/potassium-transporting ATPase subunit beta-1 OS=Rattus norvegicus GN=Atp1b1 PE=1 SV=1	-0.11802	0.0132509	0.334653
Q704S8	CACP_RAT	Carnitine O-acetyltransferase OS=Rattus norvegicus GN=Crat PE=1 SV=1	-0.125204	0.0137185	0.336983
P97852	DHB4_RAT	Peroxisomal multifunctional enzyme type 2 OS=Rattus norvegicus GN=Hsd17b4 PE=1 SV=3	-0.132735	0.0145007	0.347291
Q9WV87	NOX1_RAT	NADPH oxidase 1 OS=Rattus norvegicus GN=Nox1 PE=2 SV=1	-0.228488	0.0150351	0.351309
O88377	PI42B_RAT	Phosphatidylinositol 5-phosphate 4-kinase type-2 beta OS=Rattus norvegicus GN=Pip4k2b PE=1 SV=1	0.120862	0.0158868	0.35776
P11167	GTR1_RAT	Solute carrier family 2, facilitated glucose transporter member 1 OS=Rattus norvegicus GN=Slc2a1 PE=1 SV=1	-0.321356	0.0160581	0.35776
P37805	TAGL3_RAT	Transgelin-3 OS=Rattus norvegicus GN=Tagln3 PE=1 SV=2	0.241684	0.0176184	0.375077
Q5U316	RAB35_RAT	Ras-related protein Rab-35 OS=Rattus norvegicus GN=Rab35 PE=2 SV=1	0.14074	0.0176009	0.375077
Q5M821	PPM1H_RAT	Protein phosphatase 1H OS=Rattus norvegicus GN=Ppm1h PE=2 SV=2	0.21253	0.0190967	0.388267
Q9QYL8	LYPA2_RAT	Acyl-protein thioesterase 2 OS=Rattus norvegicus GN=Lypla2 PE=1 SV=1	0.146816	0.0193519	0.388267
P51650	SSDH_RAT	Succinate-semialdehyde dehydrogenase, mitochondrial OS=Rattus norvegicus GN=Aldh5a1 PE=1 SV=2	-0.143225	0.0198592	0.388267
Q9ES21	SAC1_RAT	Phosphatidylinositide phosphatase SAC1 OS=Rattus norvegicus GN=Sacm1l PE=1 SV=1	-0.233816	0.0194753	0.388267
P80431	COX7B_RAT	Cytochrome c oxidase subunit 7B, mitochondrial OS=Rattus norvegicus GN=Cox7b PE=1 SV=3	0.312935	0.0216823	0.399455
Q62658	FKB1A_RAT	Peptidyl-prolyl cis-trans isomerase FKBP1A OS=Rattus norvegicus GN=Fkbp1a PE=1 SV=3	0.18371	0.0211572	0.399455
O35832	CKD18_RAT	Cyclin-dependent kinase 18 OS=Rattus norvegicus GN=Cdk18 PE=1 SV=1	0.14201	0.0216418	0.399455
P0C1X8	AAK1_RAT	AP2-associated protein kinase 1 OS=Rattus norvegicus GN=Aak1 PE=1 SV=1	-0.168073	0.0225408	0.407435
P34058	HS90B_RAT	Heat shock protein HSP 90-beta OS=Rattus norvegicus GN=Hsp90ab1 PE=1 SV=4	-0.0832487	0.0241895	0.421336
P12785	FAS_RAT	Fatty acid synthase OS=Rattus norvegicus GN=Fasn PE=1 SV=3	-0.138945	0.0239507	0.421336
Q66H15	RMD3_RAT	Regulator of microtubule dynamics protein 3 OS=Rattus norvegicus GN=Rmdn3 PE=2 SV=1	0.172871	0.0276375	0.440761
P19332	TAU_RAT	Microtubule-associated protein tau OS=Rattus norvegicus GN=Mapt PE=1 SV=3	0.11366	0.0275638	0.440761
P09812	PYGM_RAT	Glycogen phosphorylase, muscle form OS=Rattus norvegicus GN=Pygm PE=2 SV=5	-0.131789	0.0272182	0.440761
P47875	CSRP1_RAT	Cysteine and glycine-rich protein 1 OS=Rattus norvegicus GN=Csrp1 PE=2 SV=2	-0.164771	0.0280652	0.440761
P30427	PLEC_RAT	Plectin OS=Rattus norvegicus GN=Plec PE=1 SV=2	-0.195621	0.0261427	0.440761
Q5RJL0	ERMIN_RAT	Ermin OS=Rattus norvegicus GN=Ermn PE=1 SV=1	-0.233652	0.0269338	0.440761
Q6P6V0	G6PI_RAT	Glucose-6-phosphate isomerase OS=Rattus norvegicus GN=Gpi PE=1 SV=1	0.110533	0.0289571	0.441656
Q6PCU2	VATE1_RAT	V-type proton ATPase subunit E 1 OS=Rattus norvegicus GN=Atp6v1e1 PE=1 SV=1	-0.0731889	0.0290442	0.441656
P05197	EF2_RAT	Elongation factor 2 OS=Rattus norvegicus GN=Eef2 PE=1 SV=4	-0.0957776	0.0303747	0.454671
Q9JJK1	GPM6B_RAT	Neuronal membrane glycoprotein M6-b OS=Rattus norvegicus GN=Gpm6b PE=1 SV=1	0.172591	0.0381535	0.493933
F1LN46	CPT1C_RAT	Carnitine O-palmitoyltransferase 1, brain isoform OS=Rattus norvegicus GN=Cpt1c PE=1 SV=1	0.163544	0.0377882	0.493933
P08082	CLCB_RAT	Clathrin light chain B OS=Rattus norvegicus GN=Cltb PE=1 SV=1	-0.076935	0.0379398	0.493933
O35095	NCDN_RAT	Neurochondrin OS=Rattus norvegicus GN=Ncdn PE=1 SV=2	-0.0840666	0.0354573	0.493933
Q68FU3	ETFB_RAT	Electron transfer flavoprotein subunit beta OS=Rattus norvegicus GN=Etfb PE=2 SV=3	-0.114688	0.0335454	0.493933
Q9Z1B2	GSTM5_RAT	Glutathione S-transferase Mu 5 OS=Rattus norvegicus GN=Gstm5 PE=1 SV=3	-0.126309	0.0371577	0.493933
Q9WU82	CTNB1_RAT	Catenin beta-1 OS=Rattus norvegicus GN=Ctnnb1 PE=1 SV=1	-0.168805	0.0354268	0.493933
P52759	UK114_RAT	Ribonuclease UK114 OS=Rattus norvegicus GN=Hrsp12 PE=1 SV=3	-0.176935	0.0361938	0.493933
Q5BJS7	CPNE9_RAT	Copine-9 OS=Rattus norvegicus GN=Cpne9 PE=2 SV=1	-0.295336	0.0342125	0.493933
P19527	NFL_RAT	Neurofilament light polypeptide OS=Rattus norvegicus GN=Nefl PE=1 SV=3	-0.299458	0.0373356	0.493933
P80432	COX7C_RAT	Cytochrome c oxidase subunit 7C, mitochondrial OS=Rattus norvegicus GN=Cox7c PE=1 SV=2	0.192803	0.0401419	0.494477
O88954	MPP3_RAT	MAGUK p55 subfamily member 3 OS=Rattus norvegicus GN=Mpp3 PE=1 SV=3	0.179665	0.0412924	0.494477
O08838	AMPH_RAT	Amphiphysin OS=Rattus norvegicus GN=Amph PE=1 SV=1	-0.062479	0.0409415	0.494477
P38650	DYHC1_RAT	Cytoplasmic dynein 1 heavy chain 1 OS=Rattus norvegicus GN=Dync1h1 PE=1 SV=1	-0.0969563	0.0391009	0.494477
Q566R0	THEM4_RAT	Acyl-coenzyme A thioesterase THEM4 OS=Rattus norvegicus GN=Them4 PE=2 SV=1	-0.138467	0.0411675	0.494477
Q6AYE2	SHLB1_RAT	Endophilin-B1 OS=Rattus norvegicus GN=Sh3glb1 PE=2 SV=1	-0.208131	0.0412166	0.494477
Q812E9	GPM6A_RAT	Neuronal membrane glycoprotein M6-a OS=Rattus norvegicus GN=Gpm6a PE=1 SV=1	0.202985	0.0426857	0.498694
Q63570	PRS6B_RAT	26S protease regulatory subunit 6B OS=Rattus norvegicus GN=Psmc4 PE=1 SV=1	-0.292377	0.0421826	0.498694
P62749	HPCL1_RAT	Hippocalcin-like protein 1 OS=Rattus norvegicus GN=Hpcal1 PE=1 SV=2	-0.156989	0.0432114	0.498753
Q3KR86	IMMT_RAT	Mitochondrial inner membrane protein (Fragment) OS=Rattus norvegicus GN=Immt PE=1 SV=1	0.121963	0.0450264	0.503586
P21396	AOFA_RAT	Amine oxidase [flavin-containing] A OS=Rattus norvegicus GN=Maoa PE=1 SV=1	0.10861	0.0443002	0.503586
B3GNI6	SEP11_RAT	Septin-11 OS=Rattus norvegicus GN=Sept11 PE=1 SV=1	0.103223	0.0454999	0.503586
Q68FX1	MPI_RAT	Mannose-6-phosphate isomerase OS=Rattus norvegicus GN=Mpi PE=2 SV=1	-0.261266	0.0457327	0.503586
P21913	DHSB_RAT	Succinate dehydrogenase [ubiquinone] iron-sulfur subunit, mitochondrial OS=Rattus norvegicus GN=Sdhb PE=2 SV=2	0.0704576	0.0477628	0.508409
Q568Z9	PHYIP_RAT	Phytanoyl-CoA hydroxylase-interacting protein OS=Rattus norvegicus GN=Phyhip PE=2 SV=1	-0.0814322	0.0470527	0.508409
Q8VBU2	NDRG2_RAT	Protein NDRG2 OS=Rattus norvegicus GN=Ndrg2 PE=1 SV=1	-0.144912	0.0474721	0.508409
P10960	SAP_RAT	Sulfated glycoprotein 1 OS=Rattus norvegicus GN=Psap PE=1 SV=1	0.334126	0.0608177	0.545105
Q9EQV6	TPP1_RAT	Tripeptidyl-peptidase 1 OS=Rattus norvegicus GN=Tpp1 PE=1 SV=1	0.332265	0.0697211	0.545105
P10818	CX6A1_RAT	Cytochrome c oxidase subunit 6A1, mitochondrial OS=Rattus norvegicus GN=Cox6a1 PE=1 SV=2	0.290976	0.0647706	0.545105
Q9R1Z0	VDAC3_RAT	Voltage-dependent anion-selective channel protein 3 OS=Rattus norvegicus GN=Vdac3 PE=1 SV=2	0.264643	0.0616191	0.545105
Q9Z327	SYNPO_RAT	Synaptopodin OS=Rattus norvegicus GN=Synpo PE=2 SV=2	0.256107	0.0589045	0.545105
P11240	COX5A_RAT	Cytochrome c oxidase subunit 5A, mitochondrial OS=Rattus norvegicus GN=Cox5a PE=1 SV=1	0.206589	0.0638136	0.545105
Q9JHY2	SFXN3_RAT	Sideroflexin-3 OS=Rattus norvegicus GN=Sfxn3 PE=2 SV=1	0.178693	0.0585984	0.545105
O70441	SYN3_RAT	Synapsin-3 OS=Rattus norvegicus GN=Syn3 PE=1 SV=1	0.126452	0.0663652	0.545105
Q920L2	DHSA_RAT	Succinate dehydrogenase [ubiquinone] flavoprotein subunit, mitochondrial OS=Rattus norvegicus GN=Sdha PE=1 SV=1	0.113893	0.06635	0.545105
Q9JID2	GNA11_RAT	Guanine nucleotide-binding protein subunit alpha-11 OS=Rattus norvegicus GN=Gna11 PE=2 SV=1	0.106138	0.0648089	0.545105
P45953	ACADV_RAT	Very long-chain specific acyl-CoA dehydrogenase, mitochondrial OS=Rattus norvegicus GN=Acadvl PE=1 SV=1	0.0975693	0.0715941	0.545105
Q5XIT9	MCCB_RAT	Methylcrotonoyl-CoA carboxylase beta chain, mitochondrial OS=Rattus norvegicus GN=Mccc2 PE=2 SV=1	0.0975618	0.0719738	0.545105
Q4QQV3	F162A_RAT	Protein FAM162A OS=Rattus norvegicus GN=Fam162a PE=2 SV=1	0.0958556	0.0713006	0.545105
P61107	RAB14_RAT	Ras-related protein Rab-14 OS=Rattus norvegicus GN=Rab14 PE=1 SV=3	0.0856002	0.0697051	0.545105
Q63560	MAP6_RAT	Microtubule-associated protein 6 OS=Rattus norvegicus GN=Map6 PE=1 SV=1	0.0801291	0.060164	0.545105
P47942	DPYL2_RAT	Dihydropyrimidinase-related protein 2 OS=Rattus norvegicus GN=Dpysl2 PE=1 SV=1	0.0689898	0.0682767	0.545105
P48721	GRP75_RAT	Stress-70 protein, mitochondrial OS=Rattus norvegicus GN=Hspa9 PE=1 SV=3	0.0645246	0.0729993	0.545105
P61765	STXB1_RAT	Syntaxin-binding protein 1 OS=Rattus norvegicus GN=Stxbp1 PE=1 SV=1	0.0562574	0.0611046	0.545105
Q5FVI6	VATC1_RAT	V-type proton ATPase subunit C 1 OS=Rattus norvegicus GN=Atp6v1c1 PE=2 SV=1	-0.0530648	0.071669	0.545105
Q63226	GRID2_RAT	Glutamate receptor ionotropic, delta-2 OS=Rattus norvegicus GN=Grid2 PE=1 SV=2	-0.0687242	0.0695417	0.545105
P25286	VPP1_RAT	V-type proton ATPase 116 kDa subunit a isoform 1 OS=Rattus norvegicus GN=Atp6v0a1 PE=2 SV=1	-0.0728548	0.0589346	0.545105
Q4KM73	KCY_RAT	UMP-CMP kinase OS=Rattus norvegicus GN=Cmpk1 PE=1 SV=2	-0.0750845	0.0653965	0.545105
P13803	ETFA_RAT	Electron transfer flavoprotein subunit alpha, mitochondrial OS=Rattus norvegicus GN=Etfa PE=1 SV=4	-0.0852802	0.0685758	0.545105
Q63633	S12A5_RAT	Solute carrier family 12 member 5 OS=Rattus norvegicus GN=Slc12a5 PE=1 SV=2	-0.0855651	0.0734014	0.545105
Q9Z2F5	CTBP1_RAT	C-terminal-binding protein 1 OS=Rattus norvegicus GN=Ctbp1 PE=1 SV=3	-0.0864298	0.0646242	0.545105
P82995	HS90A_RAT	Heat shock protein HSP 90-alpha OS=Rattus norvegicus GN=Hsp90aa1 PE=1 SV=3	-0.0876583	0.0529963	0.545105
D3ZHV2	MACF1_RAT	Microtubule-actin cross-linking factor 1 OS=Rattus norvegicus GN=Macf1 PE=1 SV=1	-0.0956629	0.0672376	0.545105
P63319	KPCG_RAT	Protein kinase C gamma type OS=Rattus norvegicus GN=Prkcg PE=1 SV=1	-0.109703	0.0587019	0.545105
Q62717	CAPS1_RAT	Calcium-dependent secretion activator 1 OS=Rattus norvegicus GN=Cadps PE=1 SV=1	-0.113849	0.0727024	0.545105
P62744	AP2S1_RAT	AP-2 complex subunit sigma OS=Rattus norvegicus GN=Ap2s1 PE=2 SV=1	-0.132348	0.056254	0.545105
Q5XI22	THIC_RAT	Acetyl-CoA acetyltransferase, cytosolic OS=Rattus norvegicus GN=Acat2 PE=1 SV=1	-0.161171	0.0527791	0.545105
Q9Z250	LIN7A_RAT	Protein lin-7 homolog A OS=Rattus norvegicus GN=Lin7a PE=1 SV=2	-0.161857	0.0702004	0.545105
P63159	HMGB1_RAT	High mobility group protein B1 OS=Rattus norvegicus GN=Hmgb1 PE=1 SV=2	-0.182273	0.0686607	0.545105
D3ZPX4	PLXA3_RAT	Plexin-A3 OS=Rattus norvegicus GN=Plxna3 PE=3 SV=1	-0.200514	0.061993	0.545105
Q5U211	SNX3_RAT	Sorting nexin-3 OS=Rattus norvegicus GN=Snx3 PE=1 SV=1	-0.205618	0.0585208	0.545105
P11275	KCC2A_RAT	Calcium/calmodulin-dependent protein kinase type II subunit alpha OS=Rattus norvegicus GN=Camk2a PE=1 SV=1	-0.221384	0.0552259	0.545105
P97519	HMGCL_RAT	Hydroxymethylglutaryl-CoA lyase, mitochondrial OS=Rattus norvegicus GN=Hmgcl PE=2 SV=1	-0.239833	0.0523673	0.545105
P47819	GFAP_RAT	Glial fibrillary acidic protein OS=Rattus norvegicus GN=Gfap PE=1 SV=2	-0.360168	0.0581392	0.545105
Q62728	PTN21_RAT	Tyrosine-protein phosphatase non-receptor type 21 OS=Rattus norvegicus GN=Ptpn21 PE=2 SV=1	-0.364525	0.0728159	0.545105
Q9WUS0	KAD4_RAT	GTP:AMP phosphotransferase AK4, mitochondrial OS=Rattus norvegicus GN=Ak4 PE=2 SV=1	0.106506	0.0742866	0.547435
P61265	STX1B_RAT	Syntaxin-1B OS=Rattus norvegicus GN=Stx1b PE=1 SV=1	0.0626901	0.0749737	0.548281
Q80W89	NDUAB_RAT	NADH dehydrogenase [ubiquinone] 1 alpha subcomplex subunit 11 OS=Rattus norvegicus GN=Ndufa11 PE=2 SV=1	0.177639	0.0760935	0.552254
Q08415	KAT1_RAT	Kynurenine--oxoglutarate transaminase 1, mitochondrial OS=Rattus norvegicus GN=Ccbl1 PE=1 SV=1	0.271402	0.079222	0.562183
P62824	RAB3C_RAT	Ras-related protein Rab-3C OS=Rattus norvegicus GN=Rab3c PE=1 SV=1	0.138493	0.0785592	0.562183
Q62848	ARFG1_RAT	ADP-ribosylation factor GTPase-activating protein 1 OS=Rattus norvegicus GN=Arfgap1 PE=1 SV=1	-0.166782	0.0790959	0.562183
Q9Z2L0	VDAC1_RAT	Voltage-dependent anion-selective channel protein 1 OS=Rattus norvegicus GN=Vdac1 PE=1 SV=4	0.244495	0.0837146	0.563264
P10888	COX41_RAT	Cytochrome c oxidase subunit 4 isoform 1, mitochondrial OS=Rattus norvegicus GN=Cox4i1 PE=1 SV=1	0.201626	0.0812381	0.563264
O35244	PRDX6_RAT	Peroxiredoxin-6 OS=Rattus norvegicus GN=Prdx6 PE=1 SV=3	0.141739	0.082742	0.563264
P56522	ADRO_RAT	NADPH:adrenodoxin oxidoreductase, mitochondrial OS=Rattus norvegicus GN=Fdxr PE=1 SV=1	0.120648	0.0847592	0.563264
P37377	SYUA_RAT	Alpha-synuclein OS=Rattus norvegicus GN=Snca PE=1 SV=1	0.102299	0.082136	0.563264
Q5PPJ9	SHLB2_RAT	Endophilin-B2 OS=Rattus norvegicus GN=Sh3glb2 PE=2 SV=2	0.0823157	0.0839635	0.563264
A1L108	ARP5L_RAT	Actin-related protein 2/3 complex subunit 5-like protein OS=Rattus norvegicus GN=Arpc5l PE=1 SV=2	-0.085035	0.0852539	0.563264
P11884	ALDH2_RAT	Aldehyde dehydrogenase, mitochondrial OS=Rattus norvegicus GN=Aldh2 PE=1 SV=1	-0.0977825	0.0838211	0.563264
Q66HD0	ENPL_RAT	Endoplasmin OS=Rattus norvegicus GN=Hsp90b1 PE=1 SV=2	-0.166445	0.0851343	0.563264
P23565	AINX_RAT	Alpha-internexin OS=Rattus norvegicus GN=Ina PE=1 SV=2	-0.213473	0.0845984	0.563264
P97576	GRPE1_RAT	GrpE protein homolog 1, mitochondrial OS=Rattus norvegicus GN=Grpel1 PE=1 SV=2	0.0948235	0.0865755	0.56516
B4F7A1	LYRM7_RAT	Complex III assembly factor LYRM7 OS=Rattus norvegicus GN=Lyrm7 PE=3 SV=1	-0.119432	0.0873107	0.56516
D3ZYW7	FRDA_RAT	Frataxin, mitochondrial OS=Rattus norvegicus GN=Fxn PE=1 SV=1	-0.195543	0.0870181	0.56516
Q6GMN2	BAIP2_RAT	Brain-specific angiogenesis inhibitor 1-associated protein 2 OS=Rattus norvegicus GN=Baiap2 PE=1 SV=1	0.266888	0.0884944	0.568977
Q641Y8	DDX1_RAT	ATP-dependent RNA helicase DDX1 OS=Rattus norvegicus GN=Ddx1 PE=2 SV=1	0.0924597	0.0900119	0.574876
P51869	CP4F4_RAT	Cytochrome P450 4F4 OS=Rattus norvegicus GN=Cyp4f4 PE=2 SV=1	-0.0871101	0.0909987	0.57733
Q5PPN7	CCD51_RAT	Coiled-coil domain-containing protein 51 OS=Rattus norvegicus GN=Ccdc51 PE=2 SV=2	0.182112	0.092896	0.584688
P20070	NB5R3_RAT	NADH-cytochrome b5 reductase 3 OS=Rattus norvegicus GN=Cyb5r3 PE=1 SV=2	-0.193475	0.0933791	0.584688
Q62824	EXOC4_RAT	Exocyst complex component 4 OS=Rattus norvegicus GN=Exoc4 PE=1 SV=1	0.28553	0.0962011	0.590773
P47728	CALB2_RAT	Calretinin OS=Rattus norvegicus GN=Calb2 PE=1 SV=1	0.174911	0.095157	0.590773
Q4V8F9	HSDL2_RAT	Hydroxysteroid dehydrogenase-like protein 2 OS=Rattus norvegicus GN=Hsdl2 PE=2 SV=1	0.106241	0.0957576	0.590773
Q9JJW3	USMG5_RAT	Up-regulated during skeletal muscle growth protein 5 OS=Rattus norvegicus GN=Usmg5 PE=1 SV=1	0.133348	0.0971644	0.592889
P70619	GSHR_RAT	Glutathione reductase (Fragment) OS=Rattus norvegicus GN=Gsr PE=2 SV=2	-0.121061	0.0985946	0.597808
Q63797	PSME1_RAT	Proteasome activator complex subunit 1 OS=Rattus norvegicus GN=Psme1 PE=2 SV=1	-0.195269	0.0992916	0.598247
Q62760	TOM20_RAT	Mitochondrial import receptor subunit TOM20 homolog OS=Rattus norvegicus GN=Tomm20 PE=1 SV=2	0.172868	0.103687	0.602479
Q66HF1	NDUS1_RAT	NADH-ubiquinone oxidoreductase 75 kDa subunit, mitochondrial OS=Rattus norvegicus GN=Ndufs1 PE=1 SV=1	0.091535	0.102921	0.602479
P63086	MK01_RAT	Mitogen-activated protein kinase 1 OS=Rattus norvegicus GN=Mapk1 PE=1 SV=3	-0.0538769	0.100676	0.602479
P62815	VATB2_RAT	V-type proton ATPase subunit B, brain isoform OS=Rattus norvegicus GN=Atp6v1b2 PE=1 SV=1	-0.0802256	0.10329	0.602479
Q9QXY2	SRCN1_RAT	SRC kinase signaling inhibitor 1 OS=Rattus norvegicus GN=Srcin1 PE=1 SV=1	-0.163959	0.102768	0.602479
P11348	DHPR_RAT	Dihydropteridine reductase OS=Rattus norvegicus GN=Qdpr PE=1 SV=1	-0.216084	0.103767	0.602479
P13697	MAOX_RAT	NADP-dependent malic enzyme OS=Rattus norvegicus GN=Me1 PE=1 SV=2	0.168308	0.105146	0.60341
P32551	QCR2_RAT	Cytochrome b-c1 complex subunit 2, mitochondrial OS=Rattus norvegicus GN=Uqcrc2 PE=1 SV=2	0.101144	0.105817	0.60341
Q00972	BCKD_RAT	[3-methyl-2-oxobutanoate dehydrogenase [lipoamide]] kinase, mitochondrial OS=Rattus norvegicus GN=Bckdk PE=1 SV=2	-0.198847	0.105498	0.60341
Q9Z1E1	FLOT1_RAT	Flotillin-1 OS=Rattus norvegicus GN=Flot1 PE=2 SV=2	0.178436	0.106695	0.604817
P60203	MYPR_RAT	Myelin proteolipid protein OS=Rattus norvegicus GN=Plp1 PE=1 SV=2	0.307115	0.107366	0.605038
P84092	AP2M1_RAT	AP-2 complex subunit mu OS=Rattus norvegicus GN=Ap2m1 PE=1 SV=1	-0.0690057	0.108106	0.605648
P29419	ATP5I_RAT	ATP synthase subunit e, mitochondrial OS=Rattus norvegicus GN=Atp5i PE=1 SV=3	0.0934133	0.10976	0.611338
P80299	HYES_RAT	Bifunctional epoxide hydrolase 2 OS=Rattus norvegicus GN=Ephx2 PE=1 SV=1	0.280221	0.110918	0.613395
P05708	HXK1_RAT	Hexokinase-1 OS=Rattus norvegicus GN=Hk1 PE=1 SV=4	0.144848	0.11386	0.613395
Q5M9I5	QCR6_RAT	Cytochrome b-c1 complex subunit 6, mitochondrial OS=Rattus norvegicus GN=Uqcrh PE=3 SV=1	0.143676	0.113591	0.613395
Q05695	L1CAM_RAT	Neural cell adhesion molecule L1 OS=Rattus norvegicus GN=L1cam PE=2 SV=3	0.107205	0.113654	0.613395
P05371	CLUS_RAT	Clusterin OS=Rattus norvegicus GN=Clu PE=1 SV=2	-0.0818835	0.113971	0.613395
P19491	GRIA2_RAT	Glutamate receptor 2 OS=Rattus norvegicus GN=Gria2 PE=1 SV=2	-0.113715	0.111632	0.613395
P35435	ATPG_RAT	ATP synthase subunit gamma, mitochondrial OS=Rattus norvegicus GN=Atp5c1 PE=1 SV=2	0.056668	0.114795	0.614244
P52873	PYC_RAT	Pyruvate carboxylase, mitochondrial OS=Rattus norvegicus GN=Pc PE=1 SV=2	-0.0625153	0.115411	0.614244
P21575	DYN1_RAT	Dynamin-1 OS=Rattus norvegicus GN=Dnm1 PE=1 SV=2	-0.0779833	0.116933	0.618905
O55171	ACOT2_RAT	Acyl-coenzyme A thioesterase 2, mitochondrial OS=Rattus norvegicus GN=Acot2 PE=1 SV=1	0.119709	0.117644	0.619248
P61589	RHOA_RAT	Transforming protein RhoA OS=Rattus norvegicus GN=Rhoa PE=1 SV=1	0.105876	0.120178	0.619288
P47709	RP3A_RAT	Rabphilin-3A OS=Rattus norvegicus GN=Rph3a PE=1 SV=1	0.0951231	0.120884	0.619288
P18484	AP2A2_RAT	AP-2 complex subunit alpha-2 OS=Rattus norvegicus GN=Ap2a2 PE=1 SV=3	-0.0651862	0.120447	0.619288
P97532	THTM_RAT	3-mercaptopyruvate sulfurtransferase OS=Rattus norvegicus GN=Mpst PE=1 SV=3	-0.109889	0.118876	0.619288
P12346	TRFE_RAT	Serotransferrin OS=Rattus norvegicus GN=Tf PE=1 SV=3	-0.138169	0.120378	0.619288
Q9QWN8	SPTN2_RAT	Spectrin beta chain, non-erythrocytic 2 OS=Rattus norvegicus GN=Sptbn2 PE=1 SV=2	0.0672151	0.123496	0.629305
P09117	ALDOC_RAT	Fructose-bisphosphate aldolase C OS=Rattus norvegicus GN=Aldoc PE=1 SV=3	-0.0751379	0.125047	0.631537
P62142	PP1B_RAT	Serine/threonine-protein phosphatase PP1-beta catalytic subunit OS=Rattus norvegicus GN=Ppp1cb PE=1 SV=3	-0.112468	0.125253	0.631537
Q5I0L3	SYYM_RAT	Tyrosine--tRNA ligase, mitochondrial OS=Rattus norvegicus GN=Yars2 PE=2 SV=1	0.211592	0.127216	0.632503
P00507	AATM_RAT	Aspartate aminotransferase, mitochondrial OS=Rattus norvegicus GN=Got2 PE=1 SV=2	0.0612014	0.127958	0.632503
Q63537	SYN2_RAT	Synapsin-2 OS=Rattus norvegicus GN=Syn2 PE=1 SV=1	-0.0653666	0.128085	0.632503
Q63768	CRK_RAT	Adapter molecule crk OS=Rattus norvegicus GN=Crk PE=1 SV=1	-0.122704	0.127583	0.632503
O54921	EXOC2_RAT	Exocyst complex component 2 OS=Rattus norvegicus GN=Exoc2 PE=1 SV=1	0.247735	0.134271	0.636748
P11951	CX6C2_RAT	Cytochrome c oxidase subunit 6C-2 OS=Rattus norvegicus GN=Cox6c2 PE=1 SV=3	0.121331	0.134598	0.636748
Q60587	ECHB_RAT	Trifunctional enzyme subunit beta, mitochondrial OS=Rattus norvegicus GN=Hadhb PE=1 SV=1	0.114581	0.134927	0.636748
O88588	PACS1_RAT	Phosphofurin acidic cluster sorting protein 1 OS=Rattus norvegicus GN=Pacs1 PE=2 SV=1	0.102483	0.131729	0.636748
P67779	PHB_RAT	Prohibitin OS=Rattus norvegicus GN=Phb PE=1 SV=1	0.0983502	0.132555	0.636748
Q6DGG0	PPID_RAT	Peptidyl-prolyl cis-trans isomerase D OS=Rattus norvegicus GN=Ppid PE=1 SV=3	0.0685719	0.134682	0.636748
Q4V8B0	OXR1_RAT	Oxidation resistance protein 1 OS=Rattus norvegicus GN=Oxr1 PE=1 SV=3	-0.102225	0.133939	0.636748
Q63610	TPM3_RAT	Tropomyosin alpha-3 chain OS=Rattus norvegicus GN=Tpm3 PE=1 SV=2	-0.102933	0.132634	0.636748
P20069	MPPA_RAT	Mitochondrial-processing peptidase subunit alpha OS=Rattus norvegicus GN=Pmpca PE=1 SV=1	-0.351957	0.133186	0.636748
Q8K3P6	SCMC2_RAT	Calcium-binding mitochondrial carrier protein SCaMC-2 OS=Rattus norvegicus GN=Slc25a25 PE=1 SV=1	0.164604	0.136116	0.63921
P10719	ATPB_RAT	ATP synthase subunit beta, mitochondrial OS=Rattus norvegicus GN=Atp5b PE=1 SV=2	0.051204	0.137618	0.639989
Q5FVI4	CEND_RAT	Cell cycle exit and neuronal differentiation protein 1 OS=Rattus norvegicus GN=Cend1 PE=1 SV=1	-0.0738316	0.13731	0.639989
Q2TL32	UBR4_RAT	E3 ubiquitin-protein ligase UBR4 OS=Rattus norvegicus GN=Ubr4 PE=2 SV=2	-0.196844	0.13858	0.641353
Q9QYU2	EFTS_RAT	Elongation factor Ts, mitochondrial OS=Rattus norvegicus GN=Tsfm PE=2 SV=1	0.210442	0.139985	0.644129
Q9JI12	VGLU2_RAT	Vesicular glutamate transporter 2 OS=Rattus norvegicus GN=Slc17a6 PE=1 SV=1	0.196353	0.143111	0.644129
Q63016	LAT1_RAT	Large neutral amino acids transporter small subunit 1 OS=Rattus norvegicus GN=Slc7a5 PE=1 SV=2	0.183901	0.143214	0.644129
P19627	GNAZ_RAT	Guanine nucleotide-binding protein G(z) subunit alpha OS=Rattus norvegicus GN=Gnaz PE=2 SV=3	0.0967276	0.142669	0.644129
Q05140	AP180_RAT	Clathrin coat assembly protein AP180 OS=Rattus norvegicus GN=Snap91 PE=1 SV=1	-0.0879894	0.141992	0.644129
P52555	ERP29_RAT	Endoplasmic reticulum resident protein 29 OS=Rattus norvegicus GN=Erp29 PE=1 SV=2	-0.168582	0.142003	0.644129
B1WBW4	ARM10_RAT	Armadillo repeat-containing protein 10 OS=Rattus norvegicus GN=Armc10 PE=2 SV=1	0.101757	0.144219	0.645216
Q68FX9	SIR5_RAT	NAD-dependent protein deacylase sirtuin-5, mitochondrial OS=Rattus norvegicus GN=Sirt5 PE=2 SV=1	0.0783921	0.145112	0.645216
P85973	PNPH_RAT	Purine nucleoside phosphorylase OS=Rattus norvegicus GN=Pnp PE=1 SV=1	-0.122719	0.145477	0.645216
Q08163	CAP1_RAT	Adenylyl cyclase-associated protein 1 OS=Rattus norvegicus GN=Cap1 PE=1 SV=3	0.0741555	0.146374	0.646203
P31399	ATP5H_RAT	ATP synthase subunit d, mitochondrial OS=Rattus norvegicus GN=Atp5h PE=1 SV=3	0.106115	0.151661	0.647328
Q505J9	ATAD1_RAT	ATPase family AAA domain-containing protein 1 OS=Rattus norvegicus GN=Atad1 PE=1 SV=1	0.0628232	0.152034	0.647328
P06687	AT1A3_RAT	Sodium/potassium-transporting ATPase subunit alpha-3 OS=Rattus norvegicus GN=Atp1a3 PE=1 SV=2	-0.0698192	0.150485	0.647328
P04041	GPX1_RAT	Glutathione peroxidase 1 OS=Rattus norvegicus GN=Gpx1 PE=1 SV=4	-0.0943308	0.150041	0.647328
P04785	PDIA1_RAT	Protein disulfide-isomerase OS=Rattus norvegicus GN=P4hb PE=1 SV=2	-0.112588	0.149519	0.647328
Q9JK00	SCN3B_RAT	Sodium channel subunit beta-3 OS=Rattus norvegicus GN=Scn3b PE=1 SV=1	-0.113114	0.150131	0.647328
P18418	CALR_RAT	Calreticulin OS=Rattus norvegicus GN=Calr PE=1 SV=1	-0.11344	0.151588	0.647328
Q63259	PTPRN_RAT	Receptor-type tyrosine-protein phosphatase-like N OS=Rattus norvegicus GN=Ptprn PE=2 SV=2	-0.2183	0.148356	0.647328
Q3MIE4	VAT1_RAT	Synaptic vesicle membrane protein VAT-1 homolog OS=Rattus norvegicus GN=Vat1 PE=1 SV=1	0.142511	0.154532	0.647804
P08461	ODP2_RAT	Dihydrolipoyllysine-residue acetyltransferase component of pyruvate dehydrogenase complex, mitochondrial OS=Rattus norvegicus GN=Dlat PE=1 SV=3	0.0753537	0.15401	0.647804
Q5M7U6	ARP2_RAT	Actin-related protein 2 OS=Rattus norvegicus GN=Actr2 PE=1 SV=1	-0.116986	0.154851	0.647804
Q62847	ADDG_RAT	Gamma-adducin OS=Rattus norvegicus GN=Add3 PE=1 SV=2	-0.12218	0.152963	0.647804
Q9WVC0	SEPT7_RAT	Septin-7 OS=Rattus norvegicus GN=Sept7 PE=1 SV=1	0.0353468	0.156477	0.649064
O35179	SH3G2_RAT	Endophilin-A1 OS=Rattus norvegicus GN=Sh3gl2 PE=1 SV=2	-0.0569139	0.156618	0.649064
P62483	KCAB2_RAT	Voltage-gated potassium channel subunit beta-2 OS=Rattus norvegicus GN=Kcnab2 PE=1 SV=1	-0.134027	0.157184	0.649064
P32198	CPT1A_RAT	Carnitine O-palmitoyltransferase 1, liver isoform OS=Rattus norvegicus GN=Cpt1a PE=1 SV=2	0.111275	0.159095	0.654134
Q9JK11	RTN4_RAT	Reticulon-4 OS=Rattus norvegicus GN=Rtn4 PE=1 SV=1	0.422231	0.16002	0.655123
P05508	NU4M_RAT	NADH-ubiquinone oxidoreductase chain 4 OS=Rattus norvegicus GN=Mtnd4 PE=2 SV=2	0.121031	0.162134	0.655376
Q01992	MIPEP_RAT	Mitochondrial intermediate peptidase OS=Rattus norvegicus GN=Mipep PE=1 SV=1	-0.0802206	0.16162	0.655376
O35094	TIM44_RAT	Mitochondrial import inner membrane translocase subunit TIM44 OS=Rattus norvegicus GN=Timm44 PE=2 SV=1	-0.0873698	0.161295	0.655376
Q9Z269	VAPB_RAT	Vesicle-associated membrane protein-associated protein B OS=Rattus norvegicus GN=Vapb PE=1 SV=3	-0.12356	0.163473	0.658012
P28572	SC6A9_RAT	Sodium- and chloride-dependent glycine transporter 1 OS=Rattus norvegicus GN=Slc6a9 PE=1 SV=2	-0.149759	0.166261	0.666436
P11661	NU5M_RAT	NADH-ubiquinone oxidoreductase chain 5 OS=Rattus norvegicus GN=Mtnd5 PE=2 SV=2	0.124546	0.167043	0.666779
Q8K4Y5	LGI1_RAT	Leucine-rich glioma-inactivated protein 1 OS=Rattus norvegicus GN=Lgi1 PE=1 SV=1	-0.071366	0.167841	0.667186
P52504	NDUS6_RAT	NADH dehydrogenase [ubiquinone] iron-sulfur protein 6, mitochondrial OS=Rattus norvegicus GN=Ndufs6 PE=3 SV=1	0.133944	0.172317	0.669666
P00406	COX2_RAT	Cytochrome c oxidase subunit 2 OS=Rattus norvegicus GN=Mtco2 PE=2 SV=2	0.113211	0.172609	0.669666
Q5BK32	FAF2_RAT	FAS-associated factor 2 OS=Rattus norvegicus GN=Faf2 PE=2 SV=1	0.0767955	0.170213	0.669666
P14408	FUMH_RAT	Fumarate hydratase, mitochondrial OS=Rattus norvegicus GN=Fh PE=1 SV=1	0.0467767	0.170885	0.669666
Q9NQR8	NDUF4_RAT	NADH dehydrogenase [ubiquinone] 1 alpha subcomplex assembly factor 4 OS=Rattus norvegicus GN=Ndufaf4 PE=1 SV=1	-0.0827477	0.172659	0.669666
O88761	PSMD1_RAT	26S proteasome non-ATPase regulatory subunit 1 OS=Rattus norvegicus GN=Psmd1 PE=2 SV=1	-0.0960808	0.172342	0.669666
P10687	PLCB1_RAT	1-phosphatidylinositol 4,5-bisphosphate phosphodiesterase beta-1 OS=Rattus norvegicus GN=Plcb1 PE=1 SV=1	0.25989	0.17636	0.673659
P84817	FIS1_RAT	Mitochondrial fission 1 protein OS=Rattus norvegicus GN=Fis1 PE=1 SV=1	0.142853	0.176501	0.673659
Q9WU34	SEPT3_RAT	Neuronal-specific septin-3 OS=Rattus norvegicus GN=Sept3 PE=1 SV=2	-0.0385271	0.175576	0.673659
P62747	RHOB_RAT	Rho-related GTP-binding protein RhoB OS=Rattus norvegicus GN=Rhob PE=1 SV=1	-0.237895	0.17553	0.673659
P00159	CYB_RAT	Cytochrome b OS=Rattus norvegicus GN=Mt-Cyb PE=2 SV=2	0.161548	0.178983	0.677731
P23965	ECI1_RAT	Enoyl-CoA delta isomerase 1, mitochondrial OS=Rattus norvegicus GN=Eci1 PE=1 SV=1	0.0853517	0.178778	0.677731
B0BND0	ENPP6_RAT	Ectonucleotide pyrophosphatase/phosphodiesterase family member 6 OS=Rattus norvegicus GN=Enpp6 PE=2 SV=1	0.170798	0.180763	0.68029
P62959	HINT1_RAT	Histidine triad nucleotide-binding protein 1 OS=Rattus norvegicus GN=Hint1 PE=1 SV=5	0.110387	0.181079	0.68029
Q9Z0J8	NEGR1_RAT	Neuronal growth regulator 1 OS=Rattus norvegicus GN=Negr1 PE=1 SV=1	0.167594	0.186582	0.68565
P56574	IDHP_RAT	Isocitrate dehydrogenase [NADP], mitochondrial OS=Rattus norvegicus GN=Idh2 PE=1 SV=2	0.135687	0.185428	0.68565
Q9QX69	LANC1_RAT	LanC-like protein 1 OS=Rattus norvegicus GN=Lancl1 PE=2 SV=2	0.125567	0.186108	0.68565
Q5U300	UBA1_RAT	Ubiquitin-like modifier-activating enzyme 1 OS=Rattus norvegicus GN=Uba1 PE=1 SV=1	0.0975448	0.183491	0.68565
P63004	LIS1_RAT	Platelet-activating factor acetylhydrolase IB subunit alpha OS=Rattus norvegicus GN=Pafah1b1 PE=1 SV=2	0.0474074	0.186282	0.68565
Q6J4I0	PPR1B_RAT	Protein phosphatase 1 regulatory subunit 1B OS=Rattus norvegicus GN=Ppp1r1b PE=2 SV=1	-0.16246	0.1868	0.68565
P81155	VDAC2_RAT	Voltage-dependent anion-selective channel protein 2 OS=Rattus norvegicus GN=Vdac2 PE=1 SV=2	0.145738	0.199558	0.686424
Q62952	DPYL3_RAT	Dihydropyrimidinase-related protein 3 OS=Rattus norvegicus GN=Dpysl3 PE=1 SV=2	0.129624	0.206225	0.686424
Q01062	PDE2A_RAT	cGMP-dependent 3',5'-cyclic phosphodiesterase OS=Rattus norvegicus GN=Pde2a PE=1 SV=2	0.119268	0.200983	0.686424
Q4G069	RMD1_RAT	Regulator of microtubule dynamics protein 1 OS=Rattus norvegicus GN=Rmdn1 PE=2 SV=1	0.114102	0.19421	0.686424
P97700	M2OM_RAT	Mitochondrial 2-oxoglutarate/malate carrier protein OS=Rattus norvegicus GN=Slc25a11 PE=2 SV=3	0.109413	0.188546	0.686424
P19804	NDKB_RAT	Nucleoside diphosphate kinase B OS=Rattus norvegicus GN=Nme2 PE=1 SV=1	0.101082	0.203904	0.686424
Q641Y2	NDUS2_RAT	NADH dehydrogenase [ubiquinone] iron-sulfur protein 2, mitochondrial OS=Rattus norvegicus GN=Ndufs2 PE=1 SV=1	0.0974148	0.194445	0.686424
P28480	TCPA_RAT	T-complex protein 1 subunit alpha OS=Rattus norvegicus GN=Tcp1 PE=1 SV=1	0.0924586	0.200775	0.686424
P16446	PIPNA_RAT	Phosphatidylinositol transfer protein alpha isoform OS=Rattus norvegicus GN=Pitpna PE=1 SV=2	0.0879494	0.20071	0.686424
Q75Q39	TOM70_RAT	Mitochondrial import receptor subunit TOM70 OS=Rattus norvegicus GN=Tomm70a PE=1 SV=1	0.0786496	0.191519	0.686424
P97829	CD47_RAT	Leukocyte surface antigen CD47 OS=Rattus norvegicus GN=Cd47 PE=1 SV=1	0.0755401	0.200232	0.686424
P59215	GNAO_RAT	Guanine nucleotide-binding protein G(o) subunit alpha OS=Rattus norvegicus GN=Gnao1 PE=1 SV=2	0.0567696	0.202445	0.686424
P63018	HSP7C_RAT	Heat shock cognate 71 kDa protein OS=Rattus norvegicus GN=Hspa8 PE=1 SV=1	-0.0287719	0.199206	0.686424
Q01205	ODO2_RAT	Dihydrolipoyllysine-residue succinyltransferase component of 2-oxoglutarate dehydrogenase complex, mitochondrial OS=Rattus norvegicus GN=Dlst PE=1 SV=2	-0.0371137	0.206357	0.686424
Q5M7W5	MAP4_RAT	Microtubule-associated protein 4 OS=Rattus norvegicus GN=Map4 PE=1 SV=1	-0.0529696	0.204438	0.686424
P38062	MAP2_RAT	Microtubule-associated protein 2 OS=Rattus norvegicus GN=Map2 PE=1 SV=3	-0.0635684	0.190354	0.686424
P85970	ARPC2_RAT	Actin-related protein 2/3 complex subunit 2 OS=Rattus norvegicus GN=Arpc2 PE=1 SV=1	-0.0814669	0.201756	0.686424
Q9WU70	STXB5_RAT	Syntaxin-binding protein 5 OS=Rattus norvegicus GN=Stxbp5 PE=1 SV=1	-0.0917359	0.204554	0.686424
P62982	RS27A_RAT	Ubiquitin-40S ribosomal protein S27a OS=Rattus norvegicus GN=Rps27a PE=1 SV=2	-0.101785	0.188322	0.686424
P20156	VGF_RAT	Neurosecretory protein VGF OS=Rattus norvegicus GN=Vgf PE=1 SV=3	-0.112646	0.190916	0.686424
O35264	PA1B2_RAT	Platelet-activating factor acetylhydrolase IB subunit beta OS=Rattus norvegicus GN=Pafah1b2 PE=1 SV=1	-0.136715	0.191937	0.686424
P84850	D2HDH_RAT	D-2-hydroxyglutarate dehydrogenase, mitochondrial OS=Rattus norvegicus GN=D2hgdh PE=3 SV=1	-0.137195	0.197791	0.686424
O35180	SH3G3_RAT	Endophilin-A3 OS=Rattus norvegicus GN=Sh3gl3 PE=1 SV=2	-0.1382	0.2063	0.686424
P11915	NLTP_RAT	Non-specific lipid-transfer protein OS=Rattus norvegicus GN=Scp2 PE=1 SV=3	-0.140911	0.196248	0.686424
P27139	CAH2_RAT	Carbonic anhydrase 2 OS=Rattus norvegicus GN=Ca2 PE=1 SV=2	-0.142128	0.204766	0.686424
P31016	DLG4_RAT	Disks large homolog 4 OS=Rattus norvegicus GN=Dlg4 PE=1 SV=1	-0.145863	0.19497	0.686424
Q4QQW3	HOT_RAT	Hydroxyacid-oxoacid transhydrogenase, mitochondrial OS=Rattus norvegicus GN=Adhfe1 PE=1 SV=1	-0.197886	0.197616	0.686424
P11608	ATP8_RAT	ATP synthase protein 8 OS=Rattus norvegicus GN=Mt-atp8 PE=1 SV=1	0.0624567	0.208427	0.690912
Q05683	DCE2_RAT	Glutamate decarboxylase 2 OS=Rattus norvegicus GN=Gad2 PE=1 SV=1	0.0479389	0.209537	0.692195
Q99MZ4	GGT7_RAT	Gamma-glutamyltransferase 7 OS=Rattus norvegicus GN=Ggt7 PE=2 SV=2	0.161982	0.211553	0.696453
Q6AYN4	PHIPL_RAT	Phytanoyl-CoA hydroxylase-interacting protein-like OS=Rattus norvegicus GN=Phyhipl PE=2 SV=2	-0.301118	0.215259	0.706226
P30904	MIF_RAT	Macrophage migration inhibitory factor OS=Rattus norvegicus GN=Mif PE=1 SV=4	-0.116755	0.216828	0.708946
Q6AXV4	SAM50_RAT	Sorting and assembly machinery component 50 homolog OS=Rattus norvegicus GN=Samm50 PE=1 SV=1	0.131292	0.217904	0.710042
O35116	CTND2_RAT	Catenin delta-2 (Fragment) OS=Rattus norvegicus GN=Ctnnd2 PE=1 SV=1	-0.109591	0.218782	0.710486
Q5XIH7	PHB2_RAT	Prohibitin-2 OS=Rattus norvegicus GN=Phb2 PE=1 SV=1	0.0669527	0.220895	0.714923
P13437	THIM_RAT	3-ketoacyl-CoA thiolase, mitochondrial OS=Rattus norvegicus GN=Acaa2 PE=2 SV=1	0.162274	0.221743	0.715253
P05504	ATP6_RAT	ATP synthase subunit a OS=Rattus norvegicus GN=Mt-atp6 PE=1 SV=2	0.280434	0.229901	0.716142
Q62825	EXOC3_RAT	Exocyst complex component 3 OS=Rattus norvegicus GN=Exoc3 PE=1 SV=1	0.133855	0.224793	0.716142
P11960	ODBA_RAT	2-oxoisovalerate dehydrogenase subunit alpha, mitochondrial (Fragment) OS=Rattus norvegicus GN=Bckdha PE=1 SV=1	0.128042	0.228843	0.716142
P62168	NCS1_RAT	Neuronal calcium sensor 1 OS=Rattus norvegicus GN=Ncs1 PE=1 SV=2	0.122305	0.229161	0.716142
Q5BK63	NDUA9_RAT	NADH dehydrogenase [ubiquinone] 1 alpha subcomplex subunit 9, mitochondrial OS=Rattus norvegicus GN=Ndufa9 PE=1 SV=2	0.0813089	0.22816	0.716142
P49432	ODPB_RAT	Pyruvate dehydrogenase E1 component subunit beta, mitochondrial OS=Rattus norvegicus GN=Pdhb PE=1 SV=2	0.05177	0.22765	0.716142
Q63716	PRDX1_RAT	Peroxiredoxin-1 OS=Rattus norvegicus GN=Prdx1 PE=1 SV=1	-0.0439449	0.224328	0.716142
P46462	TERA_RAT	Transitional endoplasmic reticulum ATPase OS=Rattus norvegicus GN=Vcp PE=1 SV=3	-0.0485671	0.226568	0.716142
P62882	GBB5_RAT	Guanine nucleotide-binding protein subunit beta-5 OS=Rattus norvegicus GN=Gnb5 PE=2 SV=1	-0.104442	0.230242	0.716142
P63142	KCNA2_RAT	Potassium voltage-gated channel subfamily A member 2 OS=Rattus norvegicus GN=Kcna2 PE=1 SV=1	-0.11335	0.229692	0.716142
O09175	AMPB_RAT	Aminopeptidase B OS=Rattus norvegicus GN=Rnpep PE=1 SV=2	-0.172961	0.227854	0.716142
A9CMA6	TM163_RAT	Transmembrane protein 163 OS=Rattus norvegicus GN=Tmem163 PE=1 SV=1	0.0845517	0.235872	0.719051
P04642	LDHA_RAT	L-lactate dehydrogenase A chain OS=Rattus norvegicus GN=Ldha PE=1 SV=1	0.0730793	0.2359	0.719051
Q8CFN2	CDC42_RAT	Cell division control protein 42 homolog OS=Rattus norvegicus GN=Cdc42 PE=1 SV=2	0.0612391	0.235485	0.719051
Q99MZ8	LASP1_RAT	LIM and SH3 domain protein 1 OS=Rattus norvegicus GN=Lasp1 PE=1 SV=1	-0.038509	0.233754	0.719051
P11506	AT2B2_RAT	Plasma membrane calcium-transporting ATPase 2 OS=Rattus norvegicus GN=Atp2b2 PE=2 SV=2	-0.0455073	0.234782	0.719051
P31647	S6A11_RAT	Sodium- and chloride-dependent GABA transporter 3 OS=Rattus norvegicus GN=Slc6a11 PE=2 SV=1	-0.110938	0.236431	0.719051
D4AAT7	NNRD_RAT	ATP-dependent (S)-NAD(P)H-hydrate dehydratase OS=Rattus norvegicus GN=Carkd PE=2 SV=1	-0.158371	0.23642	0.719051
P31977	EZRI_RAT	Ezrin OS=Rattus norvegicus GN=Ezr PE=1 SV=3	0.1128	0.239289	0.725382
Q99PD4	ARC1A_RAT	Actin-related protein 2/3 complex subunit 1A OS=Rattus norvegicus GN=Arpc1a PE=2 SV=1	-0.0760842	0.240027	0.725382
Q5XIF3	NDUS4_RAT	NADH dehydrogenase [ubiquinone] iron-sulfur protein 4, mitochondrial OS=Rattus norvegicus GN=Ndufs4 PE=1 SV=1	0.102463	0.241306	0.726953
P35559	IDE_RAT	Insulin-degrading enzyme OS=Rattus norvegicus GN=Ide PE=1 SV=1	0.116102	0.243923	0.731202
P62762	VISL1_RAT	Visinin-like protein 1 OS=Rattus norvegicus GN=Vsnl1 PE=1 SV=2	0.0925341	0.245928	0.731202
P54313	GBB2_RAT	Guanine nucleotide-binding protein G(I)/G(S)/G(T) subunit beta-2 OS=Rattus norvegicus GN=Gnb2 PE=1 SV=4	0.0701891	0.24587	0.731202
Q920J4	TXNL1_RAT	Thioredoxin-like protein 1 OS=Rattus norvegicus GN=Txnl1 PE=1 SV=3	-0.0563571	0.246666	0.731202
P35565	CALX_RAT	Calnexin OS=Rattus norvegicus GN=Canx PE=1 SV=1	-0.0575171	0.244836	0.731202
Q63028	ADDA_RAT	Alpha-adducin OS=Rattus norvegicus GN=Add1 PE=1 SV=2	-0.0606639	0.247296	0.731202
Q63362	NDUA5_RAT	NADH dehydrogenase [ubiquinone] 1 alpha subcomplex subunit 5 OS=Rattus norvegicus GN=Ndufa5 PE=1 SV=3	0.0742911	0.249758	0.733951
P43425	GBG7_RAT	Guanine nucleotide-binding protein G(I)/G(S)/G(O) subunit gamma-7 OS=Rattus norvegicus GN=Gng7 PE=2 SV=2	-0.113157	0.249159	0.733951
P85969	SNAB_RAT	Beta-soluble NSF attachment protein OS=Rattus norvegicus GN=Napb PE=1 SV=1	0.0530286	0.251636	0.737026
Q99ML5	PCYOX_RAT	Prenylcysteine oxidase OS=Rattus norvegicus GN=Pcyox1 PE=1 SV=1	-0.0777143	0.252343	0.737026
P13668	STMN1_RAT	Stathmin OS=Rattus norvegicus GN=Stmn1 PE=1 SV=2	-0.112829	0.25391	0.739347
P85972	VINC_RAT	Vinculin OS=Rattus norvegicus GN=Vcl PE=1 SV=1	0.157432	0.257103	0.744122
P12007	IVD_RAT	Isovaleryl-CoA dehydrogenase, mitochondrial OS=Rattus norvegicus GN=Ivd PE=1 SV=2	-0.0647777	0.256807	0.744122
Q9Z1P2	ACTN1_RAT	Alpha-actinin-1 OS=Rattus norvegicus GN=Actn1 PE=1 SV=1	0.0963298	0.258903	0.744833
O70593	SGTA_RAT	Small glutamine-rich tetratricopeptide repeat-containing protein alpha OS=Rattus norvegicus GN=Sgta PE=1 SV=1	-0.123383	0.258807	0.744833
Q6AXT4	CC172_RAT	Coiled-coil domain-containing protein 172 OS=Rattus norvegicus GN=Ccdc172 PE=2 SV=1	0.165222	0.270561	0.746736
P07936	NEUM_RAT	Neuromodulin OS=Rattus norvegicus GN=Gap43 PE=1 SV=1	0.135994	0.274886	0.746736
P35171	CX7A2_RAT	Cytochrome c oxidase subunit 7A2, mitochondrial OS=Rattus norvegicus GN=Cox7a2 PE=1 SV=1	0.135092	0.264811	0.746736
P38718	MPC2_RAT	Mitochondrial pyruvate carrier 2 OS=Rattus norvegicus GN=Mpc2 PE=2 SV=1	0.0942014	0.266723	0.746736
Q91Z79	LIPA3_RAT	Liprin-alpha-3 OS=Rattus norvegicus GN=Ppfia3 PE=1 SV=2	0.0872155	0.267367	0.746736
Q4QRB4	TBB3_RAT	Tubulin beta-3 chain OS=Rattus norvegicus GN=Tubb3 PE=1 SV=1	0.0852185	0.263862	0.746736
P52481	CAP2_RAT	Adenylyl cyclase-associated protein 2 OS=Rattus norvegicus GN=Cap2 PE=2 SV=1	0.0815188	0.275934	0.746736
Q68FS2	CSN4_RAT	COP9 signalosome complex subunit 4 OS=Rattus norvegicus GN=Cops4 PE=2 SV=1	0.0715184	0.275238	0.746736
Q5XI73	GDIR1_RAT	Rho GDP-dissociation inhibitor 1 OS=Rattus norvegicus GN=Arhgdia PE=1 SV=1	0.0631149	0.260938	0.746736
P63035	CYH2_RAT	Cytohesin-2 OS=Rattus norvegicus GN=Cyth2 PE=1 SV=1	0.0614613	0.261697	0.746736
O88989	MDHC_RAT	Malate dehydrogenase, cytoplasmic OS=Rattus norvegicus GN=Mdh1 PE=1 SV=3	0.0586961	0.26664	0.746736
Q62910	SYNJ1_RAT	Synaptojanin-1 OS=Rattus norvegicus GN=Synj1 PE=1 SV=3	-0.0338364	0.265359	0.746736
Q99N27	SNX1_RAT	Sorting nexin-1 OS=Rattus norvegicus GN=Snx1 PE=1 SV=1	-0.0752603	0.264751	0.746736
P07171	CALB1_RAT	Calbindin OS=Rattus norvegicus GN=Calb1 PE=1 SV=2	-0.0872018	0.272162	0.746736
O88778	BSN_RAT	Protein bassoon OS=Rattus norvegicus GN=Bsn PE=1 SV=3	-0.0898096	0.273303	0.746736
P63331	PP2AA_RAT	Serine/threonine-protein phosphatase 2A catalytic subunit alpha isoform OS=Rattus norvegicus GN=Ppp2ca PE=1 SV=1	-0.091678	0.272653	0.746736
P24473	GSTK1_RAT	Glutathione S-transferase kappa 1 OS=Rattus norvegicus GN=Gstk1 PE=1 SV=3	-0.0979403	0.269604	0.746736
P20595	GCYB1_RAT	Guanylate cyclase soluble subunit beta-1 OS=Rattus norvegicus GN=Gucy1b3 PE=1 SV=2	-0.133281	0.26258	0.746736
P55053	FABP5_RAT	Fatty acid-binding protein, epidermal OS=Rattus norvegicus GN=Fabp5 PE=1 SV=3	-0.150758	0.270493	0.746736
P18163	ACSL1_RAT	Long-chain-fatty-acid--CoA ligase 1 OS=Rattus norvegicus GN=Acsl1 PE=1 SV=1	-0.154657	0.269671	0.746736
Q9Z311	MECR_RAT	Trans-2-enoyl-CoA reductase, mitochondrial OS=Rattus norvegicus GN=Mecr PE=2 SV=1	-0.220166	0.274885	0.746736
D3ZL52	SESQ1_RAT	Sesquipedalian-1 OS=Rattus norvegicus GN=Fam109a PE=1 SV=1	-0.131581	0.276755	0.746848
Q62634	VGLU1_RAT	Vesicular glutamate transporter 1 OS=Rattus norvegicus GN=Slc17a7 PE=1 SV=1	0.074071	0.281222	0.751485
P60905	DNJC5_RAT	DnaJ homolog subfamily C member 5 OS=Rattus norvegicus GN=Dnajc5 PE=1 SV=1	0.072506	0.282395	0.751485
Q9JM53	AIFM1_RAT	Apoptosis-inducing factor 1, mitochondrial OS=Rattus norvegicus GN=Aifm1 PE=1 SV=1	-0.0822678	0.281712	0.751485
Q80ZD5	AMGO3_RAT	Amphoterin-induced protein 3 OS=Rattus norvegicus GN=Amigo3 PE=1 SV=1	-0.112201	0.281487	0.751485
P42346	MTOR_RAT	Serine/threonine-protein kinase mTOR OS=Rattus norvegicus GN=Mtor PE=1 SV=1	-0.154595	0.281875	0.751485
O35303	DNM1L_RAT	Dynamin-1-like protein OS=Rattus norvegicus GN=Dnm1l PE=1 SV=1	-0.049171	0.285062	0.756068
Q63475	PTPR2_RAT	Receptor-type tyrosine-protein phosphatase N2 OS=Rattus norvegicus GN=Ptprn2 PE=2 SV=1	-0.0902535	0.285696	0.756068
Q99MC0	PP14A_RAT	Protein phosphatase 1 regulatory subunit 14A OS=Rattus norvegicus GN=Ppp1r14a PE=2 SV=1	0.151237	0.289128	0.758863
Q4FZY0	EFHD2_RAT	EF-hand domain-containing protein D2 OS=Rattus norvegicus GN=Efhd2 PE=1 SV=1	0.0975406	0.288639	0.758863
Q8VD52	PLPP_RAT	Pyridoxal phosphate phosphatase OS=Rattus norvegicus GN=Pdxp PE=1 SV=2	-0.133065	0.287915	0.758863
P53042	PPP5_RAT	Serine/threonine-protein phosphatase 5 OS=Rattus norvegicus GN=Ppp5c PE=2 SV=1	0.411625	0.305876	0.763049
Q5RJQ4	SIR2_RAT	NAD-dependent protein deacetylase sirtuin-2 OS=Rattus norvegicus GN=Sirt2 PE=1 SV=1	0.14589	0.306795	0.763049
P62076	TIM13_RAT	Mitochondrial import inner membrane translocase subunit Tim13 OS=Rattus norvegicus GN=Timm13 PE=3 SV=1	0.140426	0.297433	0.763049
Q99JD4	CLAP2_RAT	CLIP-associating protein 2 OS=Rattus norvegicus GN=Clasp2 PE=2 SV=1	0.138142	0.310293	0.763049
Q4G064	COQ5_RAT	2-methoxy-6-polyprenyl-1,4-benzoquinol methylase, mitochondrial OS=Rattus norvegicus GN=Coq5 PE=2 SV=1	0.0984809	0.303573	0.763049
Q05982	NDKA_RAT	Nucleoside diphosphate kinase A OS=Rattus norvegicus GN=Nme1 PE=1 SV=1	0.0911729	0.311092	0.763049
Q5BJU7	WASF1_RAT	Wiskott-Aldrich syndrome protein family member 1 OS=Rattus norvegicus GN=Wasf1 PE=2 SV=1	0.081179	0.294445	0.763049
O08815	SLK_RAT	STE20-like serine/threonine-protein kinase OS=Rattus norvegicus GN=Slk PE=1 SV=1	0.0709788	0.307722	0.763049
Q5XIG0	NUDT9_RAT	ADP-ribose pyrophosphatase, mitochondrial OS=Rattus norvegicus GN=Nudt9 PE=2 SV=1	0.0609728	0.310467	0.763049
P16617	PGK1_RAT	Phosphoglycerate kinase 1 OS=Rattus norvegicus GN=Pgk1 PE=1 SV=2	0.0563329	0.309926	0.763049
P35213	1433B_RAT	14-3-3 protein beta/alpha OS=Rattus norvegicus GN=Ywhab PE=1 SV=3	0.0522187	0.296473	0.763049
Q06647	ATPO_RAT	ATP synthase subunit O, mitochondrial OS=Rattus norvegicus GN=Atp5o PE=1 SV=1	0.0456881	0.300607	0.763049
Q641Z6	EHD1_RAT	EH domain-containing protein 1 OS=Rattus norvegicus GN=Ehd1 PE=1 SV=1	0.0396745	0.297177	0.763049
P50408	VATF_RAT	V-type proton ATPase subunit F OS=Rattus norvegicus GN=Atp6v1f PE=1 SV=1	-0.0511261	0.312022	0.763049
Q62889	NLGN3_RAT	Neuroligin-3 OS=Rattus norvegicus GN=Nlgn3 PE=1 SV=1	-0.0548479	0.312395	0.763049
P11598	PDIA3_RAT	Protein disulfide-isomerase A3 OS=Rattus norvegicus GN=Pdia3 PE=1 SV=2	-0.0559785	0.296256	0.763049
O70351	HCD2_RAT	3-hydroxyacyl-CoA dehydrogenase type-2 OS=Rattus norvegicus GN=Hsd17b10 PE=1 SV=3	-0.0644307	0.313025	0.763049
Q9Z0W7	CLIC4_RAT	Chloride intracellular channel protein 4 OS=Rattus norvegicus GN=Clic4 PE=1 SV=3	-0.0735267	0.312785	0.763049
Q6JP77	AKA7G_RAT	A-kinase anchor protein 7 isoforms delta and gamma OS=Rattus norvegicus GN=Akap7 PE=1 SV=1	-0.0736049	0.308045	0.763049
P85515	ACTZ_RAT	Alpha-centractin OS=Rattus norvegicus GN=Actr1a PE=1 SV=1	-0.0778414	0.305393	0.763049
P84083	ARF5_RAT	ADP-ribosylation factor 5 OS=Rattus norvegicus GN=Arf5 PE=1 SV=2	-0.101385	0.307367	0.763049
Q62698	DC1L2_RAT	Cytoplasmic dynein 1 light intermediate chain 2 OS=Rattus norvegicus GN=Dync1li2 PE=1 SV=1	-0.104034	0.300557	0.763049
Q9Z214	HOME1_RAT	Homer protein homolog 1 OS=Rattus norvegicus GN=Homer1 PE=1 SV=2	-0.114078	0.299844	0.763049
P08413	KCC2B_RAT	Calcium/calmodulin-dependent protein kinase type II subunit beta OS=Rattus norvegicus GN=Camk2b PE=1 SV=1	-0.116814	0.295059	0.763049
B0BN93	PSD13_RAT	26S proteasome non-ATPase regulatory subunit 13 OS=Rattus norvegicus GN=Psmd13 PE=1 SV=1	-0.12133	0.291956	0.763049
Q8VHU4	ELP1_RAT	Elongator complex protein 1 OS=Rattus norvegicus GN=Ikbkap PE=2 SV=1	-0.124572	0.297587	0.763049
Q91ZW6	TMLH_RAT	Trimethyllysine dioxygenase, mitochondrial OS=Rattus norvegicus GN=Tmlhe PE=1 SV=2	-0.126015	0.312299	0.763049
P30839	AL3A2_RAT	Fatty aldehyde dehydrogenase OS=Rattus norvegicus GN=Aldh3a2 PE=1 SV=1	-0.129642	0.304181	0.763049
P11730	KCC2G_RAT	Calcium/calmodulin-dependent protein kinase type II subunit gamma OS=Rattus norvegicus GN=Camk2g PE=2 SV=1	-0.136587	0.316197	0.768825
P08009	GSTM4_RAT	Glutathione S-transferase Yb-3 OS=Rattus norvegicus GN=Gstm3 PE=1 SV=2	0.103157	0.317321	0.769604
Q64542	AT2B4_RAT	Plasma membrane calcium-transporting ATPase 4 OS=Rattus norvegicus GN=Atp2b4 PE=2 SV=1	-0.0551126	0.318499	0.770511
Q5I0D5	LHPP_RAT	Phospholysine phosphohistidine inorganic pyrophosphate phosphatase OS=Rattus norvegicus GN=Lhpp PE=2 SV=1	-0.0678206	0.319533	0.771064
Q9JKS6	PCLO_RAT	Protein piccolo OS=Rattus norvegicus GN=Pclo PE=1 SV=1	-0.117557	0.321038	0.772749
P97849	S27A1_RAT	Long-chain fatty acid transport protein 1 OS=Rattus norvegicus GN=Slc27a1 PE=2 SV=1	-0.0805888	0.322726	0.774866
P29101	SYT2_RAT	Synaptotagmin-2 OS=Rattus norvegicus GN=Syt2 PE=1 SV=1	0.0617849	0.324252	0.774888
Q4V7C7	ARP3_RAT	Actin-related protein 3 OS=Rattus norvegicus GN=Actr3 PE=1 SV=1	0.047839	0.324353	0.774888
P45479	PPT1_RAT	Palmitoyl-protein thioesterase 1 OS=Rattus norvegicus GN=Ppt1 PE=1 SV=1	0.0773589	0.326949	0.779148
O08700	VPS45_RAT	Vacuolar protein sorting-associated protein 45 OS=Rattus norvegicus GN=Vps45 PE=2 SV=1	0.0748945	0.329234	0.782646
Q6AY65	ARFP2_RAT	Arfaptin-2 OS=Rattus norvegicus GN=Arfip2 PE=2 SV=1	-0.134195	0.330075	0.782702
P13233	CN37_RAT	2',3'-cyclic-nucleotide 3'-phosphodiesterase OS=Rattus norvegicus GN=Cnp PE=1 SV=2	0.135188	0.332789	0.78642
Q6AXM8	PON2_RAT	Serum paraoxonase/arylesterase 2 OS=Rattus norvegicus GN=Pon2 PE=2 SV=1	-0.0958518	0.333284	0.78642
P68511	1433F_RAT	14-3-3 protein eta OS=Rattus norvegicus GN=Ywhah PE=1 SV=2	0.0380673	0.336946	0.791163
P15999	ATPA_RAT	ATP synthase subunit alpha, mitochondrial OS=Rattus norvegicus GN=Atp5a1 PE=1 SV=2	0.036175	0.336527	0.791163
Q8VHK2	CSKI1_RAT	Caskin-1 OS=Rattus norvegicus GN=Caskin1 PE=1 SV=1	0.138399	0.341192	0.794522
Q5FVQ8	NLRX1_RAT	NLR family member X1 OS=Rattus norvegicus GN=Nlrx1 PE=2 SV=1	0.0956846	0.347012	0.794522
Q03344	ATIF1_RAT	ATPase inhibitor, mitochondrial OS=Rattus norvegicus GN=Atpif1 PE=3 SV=2	0.0697592	0.343868	0.794522
P29418	ATP5E_RAT	ATP synthase subunit epsilon, mitochondrial OS=Rattus norvegicus GN=Atp5e PE=1 SV=2	0.0637393	0.34529	0.794522
Q63228	GMFB_RAT	Glia maturation factor beta OS=Rattus norvegicus GN=Gmfb PE=1 SV=2	0.05774	0.341998	0.794522
P32851	STX1A_RAT	Syntaxin-1A OS=Rattus norvegicus GN=Stx1a PE=1 SV=1	0.041473	0.347468	0.794522
Q5XI32	CAPZB_RAT	F-actin-capping protein subunit beta OS=Rattus norvegicus GN=Capzb PE=1 SV=1	0.0180785	0.3447	0.794522
Q02356	AMPD2_RAT	AMP deaminase 2 OS=Rattus norvegicus GN=Ampd2 PE=2 SV=2	-0.0571803	0.343331	0.794522
P33124	ACSL6_RAT	Long-chain-fatty-acid--CoA ligase 6 OS=Rattus norvegicus GN=Acsl6 PE=1 SV=1	-0.0601851	0.342124	0.794522
Q6PST4	ATLA1_RAT	Atlastin-1 OS=Rattus norvegicus GN=Atl1 PE=1 SV=1	-0.0626905	0.344884	0.794522
P68403	KPCB_RAT	Protein kinase C beta type OS=Rattus norvegicus GN=Prkcb PE=1 SV=3	-0.087529	0.3475	0.794522
P63138	GBRB2_RAT	Gamma-aminobutyric acid receptor subunit beta-2 OS=Rattus norvegicus GN=Gabrb2 PE=1 SV=1	0.103511	0.349422	0.797015
Q920Q0	PALM_RAT	Paralemmin-1 OS=Rattus norvegicus GN=Palm PE=1 SV=1	0.0494082	0.352064	0.797345
Q9JKB0	HCN1_RAT	Potassium/sodium hyperpolarization-activated cyclic nucleotide-gated channel 1 OS=Rattus norvegicus GN=Hcn1 PE=2 SV=1	-0.0881988	0.352026	0.797345
P05696	KPCA_RAT	Protein kinase C alpha type OS=Rattus norvegicus GN=Prkca PE=1 SV=3	-0.114737	0.351816	0.797345
Q6WRH9	IGS10_RAT	Immunoglobulin superfamily member 10 OS=Rattus norvegicus GN=Igsf10 PE=2 SV=1	-0.115701	0.352976	0.797526
P68370	TBA1A_RAT	Tubulin alpha-1A chain OS=Rattus norvegicus GN=Tuba1a PE=1 SV=1	0.174744	0.355206	0.800676
Q05175	BASP1_RAT	Brain acid soluble protein 1 OS=Rattus norvegicus GN=Basp1 PE=1 SV=2	0.154865	0.363615	0.80613
Q62871	DC1I2_RAT	Cytoplasmic dynein 1 intermediate chain 2 OS=Rattus norvegicus GN=Dync1i2 PE=1 SV=1	0.12893	0.378548	0.80613
Q641X8	EIF3E_RAT	Eukaryotic translation initiation factor 3 subunit E OS=Rattus norvegicus GN=Eif3e PE=2 SV=1	0.125054	0.358739	0.80613
P27605	HPRT_RAT	Hypoxanthine-guanine phosphoribosyltransferase OS=Rattus norvegicus GN=Hprt1 PE=1 SV=1	0.119957	0.361847	0.80613
Q5XII9	MFR1L_RAT	Mitochondrial fission regulator 1-like OS=Rattus norvegicus GN=Mtfr1l PE=2 SV=1	0.114102	0.376035	0.80613
P63322	RALA_RAT	Ras-related protein Ral-A OS=Rattus norvegicus GN=Rala PE=1 SV=1	0.0823411	0.368394	0.80613
P82471	GNAQ_RAT	Guanine nucleotide-binding protein G(q) subunit alpha OS=Rattus norvegicus GN=Gnaq PE=1 SV=2	0.0779101	0.363062	0.80613
B0BNM1	NNRE_RAT	NAD(P)H-hydrate epimerase OS=Rattus norvegicus GN=Apoa1bp PE=2 SV=1	0.0736404	0.365564	0.80613
Q561S0	NDUAA_RAT	NADH dehydrogenase [ubiquinone] 1 alpha subcomplex subunit 10, mitochondrial OS=Rattus norvegicus GN=Ndufa10 PE=1 SV=1	0.056823	0.374342	0.80613
P13596	NCAM1_RAT	Neural cell adhesion molecule 1 OS=Rattus norvegicus GN=Ncam1 PE=1 SV=1	0.0535376	0.36426	0.80613
Q9JKE3	SCAM5_RAT	Secretory carrier-associated membrane protein 5 OS=Rattus norvegicus GN=Scamp5 PE=2 SV=1	0.052731	0.382318	0.80613
P38652	PGM1_RAT	Phosphoglucomutase-1 OS=Rattus norvegicus GN=Pgm1 PE=1 SV=2	0.0446626	0.376045	0.80613
P23978	SC6A1_RAT	Sodium- and chloride-dependent GABA transporter 1 OS=Rattus norvegicus GN=Slc6a1 PE=1 SV=1	0.0445965	0.380432	0.80613
Q6NYB7	RAB1A_RAT	Ras-related protein Rab-1A OS=Rattus norvegicus GN=Rab1A PE=1 SV=3	0.0411661	0.369508	0.80613
P97697	IMPA1_RAT	Inositol monophosphatase 1 OS=Rattus norvegicus GN=Impa1 PE=1 SV=2	-0.0246376	0.372055	0.80613
B2RZ37	REEP5_RAT	Receptor expression-enhancing protein 5 OS=Rattus norvegicus GN=Reep5 PE=1 SV=1	-0.0446051	0.38287	0.80613
Q794F9	4F2_RAT	4F2 cell-surface antigen heavy chain OS=Rattus norvegicus GN=Slc3a2 PE=1 SV=1	-0.0474891	0.377639	0.80613
P06685	AT1A1_RAT	Sodium/potassium-transporting ATPase subunit alpha-1 OS=Rattus norvegicus GN=Atp1a1 PE=1 SV=1	-0.0508917	0.367313	0.80613
O35077	GPDA_RAT	Glycerol-3-phosphate dehydrogenase [NAD(+)], cytoplasmic OS=Rattus norvegicus GN=Gpd1 PE=1 SV=4	-0.0535942	0.373674	0.80613
P62193	PRS4_RAT	26S protease regulatory subunit 4 OS=Rattus norvegicus GN=Psmc1 PE=2 SV=1	-0.0582576	0.381197	0.80613
P68035	ACTC_RAT	Actin, alpha cardiac muscle 1 OS=Rattus norvegicus GN=Actc1 PE=2 SV=1	-0.0629727	0.378782	0.80613
P97846	CNTP1_RAT	Contactin-associated protein 1 OS=Rattus norvegicus GN=Cntnap1 PE=1 SV=1	-0.0669796	0.372378	0.80613
Q6PEC4	SKP1_RAT	S-phase kinase-associated protein 1 OS=Rattus norvegicus GN=Skp1 PE=2 SV=3	-0.0711685	0.371333	0.80613
Q05764	ADDB_RAT	Beta-adducin OS=Rattus norvegicus GN=Add2 PE=2 SV=4	-0.0745341	0.369759	0.80613
B5DF89	CUL3_RAT	Cullin-3 OS=Rattus norvegicus GN=Cul3 PE=1 SV=2	-0.0759802	0.382274	0.80613
P54283	CACB1_RAT	Voltage-dependent L-type calcium channel subunit beta-1 OS=Rattus norvegicus GN=Cacnb1 PE=2 SV=1	-0.0765111	0.382648	0.80613
P13638	AT1B2_RAT	Sodium/potassium-transporting ATPase subunit beta-2 OS=Rattus norvegicus GN=Atp1b2 PE=2 SV=1	-0.079523	0.370875	0.80613
P29266	3HIDH_RAT	3-hydroxyisobutyrate dehydrogenase, mitochondrial OS=Rattus norvegicus GN=Hibadh PE=1 SV=3	-0.0854157	0.360368	0.80613
O55156	CLIP2_RAT	CAP-Gly domain-containing linker protein 2 OS=Rattus norvegicus GN=Clip2 PE=1 SV=1	-0.0876567	0.379224	0.80613
Q8K3P7	HINT3_RAT	Histidine triad nucleotide-binding protein 3 OS=Rattus norvegicus GN=Hint3 PE=2 SV=2	-0.12654	0.382281	0.80613
Q9EQS0	TALDO_RAT	Transaldolase OS=Rattus norvegicus GN=Taldo1 PE=1 SV=2	0.0789317	0.38455	0.807892
P85108	TBB2A_RAT	Tubulin beta-2A chain OS=Rattus norvegicus GN=Tubb2a PE=1 SV=1	0.128757	0.390712	0.80892
P35332	HPCL4_RAT	Hippocalcin-like protein 4 OS=Rattus norvegicus GN=Hpcal4 PE=2 SV=2	0.117555	0.392639	0.80892
Q4KLP0	DHTK1_RAT	Probable 2-oxoglutarate dehydrogenase E1 component DHKTD1, mitochondrial OS=Rattus norvegicus GN=Dhtkd1 PE=2 SV=1	0.101552	0.392243	0.80892
Q5XIC0	ECI2_RAT	Enoyl-CoA delta isomerase 2, mitochondrial OS=Rattus norvegicus GN=Eci2 PE=1 SV=1	0.0613288	0.390686	0.80892
P41499	PTN11_RAT	Tyrosine-protein phosphatase non-receptor type 11 OS=Rattus norvegicus GN=Ptpn11 PE=1 SV=4	0.0459711	0.386378	0.80892
O88600	HSP74_RAT	Heat shock 70 kDa protein 4 OS=Rattus norvegicus GN=Hspa4 PE=1 SV=1	-0.033998	0.388128	0.80892
Q5EB81	NB5R1_RAT	NADH-cytochrome b5 reductase 1 OS=Rattus norvegicus GN=Cyb5r1 PE=2 SV=1	-0.0490216	0.388697	0.80892
P70580	PGRC1_RAT	Membrane-associated progesterone receptor component 1 OS=Rattus norvegicus GN=Pgrmc1 PE=1 SV=3	-0.0636795	0.3894	0.80892
P01041	CYTB_RAT	Cystatin-B OS=Rattus norvegicus GN=Cstb PE=1 SV=1	-0.0866703	0.391374	0.80892
P47863	AQP4_RAT	Aquaporin-4 OS=Rattus norvegicus GN=Aqp4 PE=1 SV=1	0.0858118	0.393621	0.809203
Q9WVJ4	SYJ2B_RAT	Synaptojanin-2-binding protein OS=Rattus norvegicus GN=Synj2bp PE=1 SV=2	-0.0732698	0.39466	0.809602
P50399	GDIB_RAT	Rab GDP dissociation inhibitor beta OS=Rattus norvegicus GN=Gdi2 PE=1 SV=2	0.0240706	0.398282	0.814208
Q9ER34	ACON_RAT	Aconitate hydratase, mitochondrial OS=Rattus norvegicus GN=Aco2 PE=1 SV=2	-0.0297816	0.398605	0.814208
Q9JI66	S4A4_RAT	Electrogenic sodium bicarbonate cotransporter 1 OS=Rattus norvegicus GN=Slc4a4 PE=1 SV=1	0.0689437	0.408745	0.81489
Q5PQN0	NCALD_RAT	Neurocalcin-delta OS=Rattus norvegicus GN=Ncald PE=1 SV=3	0.067656	0.406072	0.81489
Q91Y81	SEPT2_RAT	Septin-2 OS=Rattus norvegicus GN=Sept2 PE=1 SV=1	0.0317352	0.404334	0.81489
P04636	MDHM_RAT	Malate dehydrogenase, mitochondrial OS=Rattus norvegicus GN=Mdh2 PE=1 SV=2	-0.0381889	0.40797	0.81489
Q9ERH3	WDR7_RAT	WD repeat-containing protein 7 OS=Rattus norvegicus GN=Wdr7 PE=2 SV=1	-0.0433961	0.409997	0.81489
Q9JHU0	DPYL5_RAT	Dihydropyrimidinase-related protein 5 OS=Rattus norvegicus GN=Dpysl5 PE=1 SV=1	-0.0541341	0.40744	0.81489
P46101	DPP6_RAT	Dipeptidyl aminopeptidase-like protein 6 OS=Rattus norvegicus GN=Dpp6 PE=1 SV=1	-0.0614776	0.401821	0.81489
P11507	AT2A2_RAT	Sarcoplasmic/endoplasmic reticulum calcium ATPase 2 OS=Rattus norvegicus GN=Atp2a2 PE=1 SV=1	-0.0662538	0.403347	0.81489
Q5GFD9	IMPCT_RAT	Protein IMPACT OS=Rattus norvegicus GN=Impact PE=2 SV=1	-0.0676905	0.403373	0.81489
B0LPN4	RYR2_RAT	Ryanodine receptor 2 OS=Rattus norvegicus GN=Ryr2 PE=1 SV=2	-0.0754508	0.40002	0.81489
Q63377	AT1B3_RAT	Sodium/potassium-transporting ATPase subunit beta-3 OS=Rattus norvegicus GN=Atp1b3 PE=2 SV=1	-0.0879936	0.409981	0.81489
P14669	ANXA3_RAT	Annexin A3 OS=Rattus norvegicus GN=Anxa3 PE=1 SV=4	-0.10082	0.402714	0.81489
P63029	TCTP_RAT	Translationally-controlled tumor protein OS=Rattus norvegicus GN=Tpt1 PE=1 SV=1	-0.12575	0.408571	0.81489
P04797	G3P_RAT	Glyceraldehyde-3-phosphate dehydrogenase OS=Rattus norvegicus GN=Gapdh PE=1 SV=3	0.0577619	0.415974	0.819911
P97710	SHPS1_RAT	Tyrosine-protein phosphatase non-receptor type substrate 1 OS=Rattus norvegicus GN=Sirpa PE=1 SV=1	0.0203459	0.415084	0.819911
Q6Q629	DPP10_RAT	Inactive dipeptidyl peptidase 10 OS=Rattus norvegicus GN=Dpp10 PE=1 SV=1	-0.0470098	0.416802	0.819911
P26769	ADCY2_RAT	Adenylate cyclase type 2 OS=Rattus norvegicus GN=Adcy2 PE=1 SV=1	-0.0745053	0.416354	0.819911
Q4KLZ6	DHAK_RAT	Bifunctional ATP-dependent dihydroxyacetone kinase/FAD-AMP lyase (cyclizing) OS=Rattus norvegicus GN=Dak PE=1 SV=1	-0.114774	0.416249	0.819911
P11505	AT2B1_RAT	Plasma membrane calcium-transporting ATPase 1 OS=Rattus norvegicus GN=Atp2b1 PE=2 SV=2	-0.0557155	0.420129	0.823075
Q9JIX3	FHIT_RAT	Bis(5'-adenosyl)-triphosphatase OS=Rattus norvegicus GN=Fhit PE=1 SV=1	-0.0851034	0.419398	0.823075
P21707	SYT1_RAT	Synaptotagmin-1 OS=Rattus norvegicus GN=Syt1 PE=1 SV=3	-0.0430662	0.421878	0.824815
Q62651	ECH1_RAT	Delta(3,5)-Delta(2,4)-dienoyl-CoA isomerase, mitochondrial OS=Rattus norvegicus GN=Ech1 PE=1 SV=2	0.108705	0.428601	0.827547
Q62718	NTRI_RAT	Neurotrimin OS=Rattus norvegicus GN=Ntm PE=1 SV=1	0.0911416	0.428972	0.827547
Q5HZA6	PPCEL_RAT	Prolyl endopeptidase-like OS=Rattus norvegicus GN=Prepl PE=2 SV=2	0.067347	0.428766	0.827547
P10536	RAB1B_RAT	Ras-related protein Rab-1B OS=Rattus norvegicus GN=Rab1b PE=1 SV=1	0.064265	0.425535	0.827547
P19139	CSK21_RAT	Casein kinase II subunit alpha OS=Rattus norvegicus GN=Csnk2a1 PE=1 SV=2	0.062153	0.429777	0.827547
Q7TQ16	QCR8_RAT	Cytochrome b-c1 complex subunit 8 OS=Rattus norvegicus GN=Uqcrq PE=3 SV=1	0.0553431	0.430695	0.827547
P15205	MAP1B_RAT	Microtubule-associated protein 1B OS=Rattus norvegicus GN=Map1b PE=1 SV=2	-0.0457876	0.43105	0.827547
Q924S5	LONM_RAT	Lon protease homolog, mitochondrial OS=Rattus norvegicus GN=Lonp1 PE=2 SV=1	-0.047549	0.425965	0.827547
Q6Q0N0	CSTN1_RAT	Calsyntenin-1 OS=Rattus norvegicus GN=Clstn1 PE=2 SV=1	-0.092147	0.428548	0.827547
Q5I6B8	PI51C_RAT	Phosphatidylinositol 4-phosphate 5-kinase type-1 gamma OS=Rattus norvegicus GN=Pip5k1c PE=1 SV=1	0.0608692	0.432165	0.827721
A0JPJ7	OLA1_RAT	Obg-like ATPase 1 OS=Rattus norvegicus GN=Ola1 PE=2 SV=1	0.05583	0.435461	0.827721
P61983	1433G_RAT	14-3-3 protein gamma OS=Rattus norvegicus GN=Ywhag PE=1 SV=2	0.0283141	0.433065	0.827721
P62632	EF1A2_RAT	Elongation factor 1-alpha 2 OS=Rattus norvegicus GN=Eef1a2 PE=2 SV=1	-0.0447839	0.434909	0.827721
Q3T1J1	IF5A1_RAT	Eukaryotic translation initiation factor 5A-1 OS=Rattus norvegicus GN=Eif5a PE=1 SV=3	-0.0489749	0.43506	0.827721
Q91XV6	FXYD6_RAT	FXYD domain-containing ion transport regulator 6 OS=Rattus norvegicus GN=Fxyd6 PE=1 SV=1	0.0834839	0.442428	0.836727
Q64559	BACH_RAT	Cytosolic acyl coenzyme A thioester hydrolase OS=Rattus norvegicus GN=Acot7 PE=1 SV=4	0.0604754	0.443758	0.836727
Q66HA6	ARL8B_RAT	ADP-ribosylation factor-like protein 8B OS=Rattus norvegicus GN=Arl8b PE=2 SV=1	0.0533163	0.444222	0.836727
P19511	AT5F1_RAT	ATP synthase subunit b, mitochondrial OS=Rattus norvegicus GN=Atp5f1 PE=1 SV=1	0.0414405	0.441882	0.836727
P21571	ATP5J_RAT	ATP synthase-coupling factor 6, mitochondrial OS=Rattus norvegicus GN=Atp5j PE=1 SV=1	-0.0336778	0.444566	0.836727
P47868	SCG3_RAT	Secretogranin-3 OS=Rattus norvegicus GN=Scg3 PE=1 SV=1	0.0796519	0.459105	0.839769
Q63083	NUCB1_RAT	Nucleobindin-1 OS=Rattus norvegicus GN=Nucb1 PE=1 SV=1	0.0726495	0.453736	0.839769
P20788	UCRI_RAT	Cytochrome b-c1 complex subunit Rieske, mitochondrial OS=Rattus norvegicus GN=Uqcrfs1 PE=1 SV=2	0.0599286	0.458109	0.839769
Q6PCU8	NDUV3_RAT	NADH dehydrogenase [ubiquinone] flavoprotein 3, mitochondrial OS=Rattus norvegicus GN=Ndufv3 PE=3 SV=1	0.0597201	0.449881	0.839769
P04897	GNAI2_RAT	Guanine nucleotide-binding protein G(i) subunit alpha-2 OS=Rattus norvegicus GN=Gnai2 PE=1 SV=3	0.0477746	0.457706	0.839769
Q8R431	MGLL_RAT	Monoglyceride lipase OS=Rattus norvegicus GN=Mgll PE=1 SV=1	0.0457953	0.447281	0.839769
P48768	NAC2_RAT	Sodium/calcium exchanger 2 OS=Rattus norvegicus GN=Slc8a2 PE=2 SV=1	0.0353517	0.45366	0.839769
Q63065	PDK1_RAT	[Pyruvate dehydrogenase [lipoamide]] kinase isozyme 1, mitochondrial OS=Rattus norvegicus GN=Pdk1 PE=1 SV=1	0.0352783	0.450218	0.839769
Q3KRE0	ATAD3_RAT	ATPase family AAA domain-containing protein 3 OS=Rattus norvegicus GN=Atad3 PE=1 SV=1	0.0344845	0.454364	0.839769
P52296	IMB1_RAT	Importin subunit beta-1 OS=Rattus norvegicus GN=Kpnb1 PE=1 SV=1	0.0259645	0.455222	0.839769
Q5XIM9	TCPB_RAT	T-complex protein 1 subunit beta OS=Rattus norvegicus GN=Cct2 PE=1 SV=3	-0.0348466	0.459331	0.839769
P30835	K6PL_RAT	6-phosphofructokinase, liver type OS=Rattus norvegicus GN=Pfkl PE=2 SV=3	-0.0544191	0.452701	0.839769
B2RZ78	VPS29_RAT	Vacuolar protein sorting-associated protein 29 OS=Rattus norvegicus GN=Vps29 PE=1 SV=2	-0.0639394	0.455134	0.839769
Q1M168	ATCAY_RAT	Caytaxin OS=Rattus norvegicus GN=Atcay PE=1 SV=1	-0.0771291	0.452364	0.839769
Q810U0	CCD50_RAT	Coiled-coil domain-containing protein 50 OS=Rattus norvegicus GN=Ccdc50 PE=2 SV=1	-0.211085	0.458816	0.839769
P24368	PPIB_RAT	Peptidyl-prolyl cis-trans isomerase B OS=Rattus norvegicus GN=Ppib PE=2 SV=3	-0.100876	0.46068	0.840631
P0C2X9	AL4A1_RAT	Delta-1-pyrroline-5-carboxylate dehydrogenase, mitochondrial OS=Rattus norvegicus GN=Aldh4a1 PE=1 SV=1	0.0526452	0.465853	0.846845
P62630	EF1A1_RAT	Elongation factor 1-alpha 1 OS=Rattus norvegicus GN=Eef1a1 PE=1 SV=1	-0.0479818	0.465087	0.846845
Q5XHZ0	TRAP1_RAT	Heat shock protein 75 kDa, mitochondrial OS=Rattus norvegicus GN=Trap1 PE=1 SV=1	0.0411067	0.467772	0.847118
P54690	BCAT1_RAT	Branched-chain-amino-acid aminotransferase, cytosolic OS=Rattus norvegicus GN=Bcat1 PE=1 SV=1	-0.0842177	0.467303	0.847118
P69897	TBB5_RAT	Tubulin beta-5 chain OS=Rattus norvegicus GN=Tubb5 PE=1 SV=1	0.11746	0.473574	0.850247
Q5XIF6	TBA4A_RAT	Tubulin alpha-4A chain OS=Rattus norvegicus GN=Tuba4a PE=2 SV=1	0.094431	0.476946	0.850247
O35796	C1QBP_RAT	Complement component 1 Q subcomponent-binding protein, mitochondrial OS=Rattus norvegicus GN=C1qbp PE=1 SV=2	0.0786359	0.479259	0.850247
P54311	GBB1_RAT	Guanine nucleotide-binding protein G(I)/G(S)/G(T) subunit beta-1 OS=Rattus norvegicus GN=Gnb1 PE=1 SV=4	0.0498331	0.479422	0.850247
Q08877	DYN3_RAT	Dynamin-3 OS=Rattus norvegicus GN=Dnm3 PE=1 SV=2	0.0431181	0.479802	0.850247
Q63372	NRX1A_RAT	Neurexin-1 OS=Rattus norvegicus GN=Nrxn1 PE=1 SV=3	0.0414637	0.48015	0.850247
P50137	TKT_RAT	Transketolase OS=Rattus norvegicus GN=Tkt PE=1 SV=1	0.0233506	0.473853	0.850247
Q4V8B7	HSDL1_RAT	Inactive hydroxysteroid dehydrogenase-like protein 1 OS=Rattus norvegicus GN=Hsdl1 PE=2 SV=1	-0.0508625	0.476308	0.850247
Q924N5	ACBG1_RAT	Long-chain-fatty-acid--CoA ligase ACSBG1 OS=Rattus norvegicus GN=Acsbg1 PE=1 SV=1	-0.0518161	0.470687	0.850247
P04764	ENOA_RAT	Alpha-enolase OS=Rattus norvegicus GN=Eno1 PE=1 SV=4	-0.056696	0.473706	0.850247
B2RYG6	OTUB1_RAT	Ubiquitin thioesterase OTUB1 OS=Rattus norvegicus GN=Otub1 PE=1 SV=1	-0.0777165	0.47737	0.850247
P09811	PYGL_RAT	Glycogen phosphorylase, liver form OS=Rattus norvegicus GN=Pygl PE=1 SV=5	-0.207422	0.478392	0.850247
Q9QYC5	ETBR2_RAT	Endothelin B receptor-like protein 2 OS=Rattus norvegicus GN=Gpr37l1 PE=2 SV=1	0.10212	0.48284	0.851498
Q6RUV5	RAC1_RAT	Ras-related C3 botulinum toxin substrate 1 OS=Rattus norvegicus GN=Rac1 PE=1 SV=1	0.101809	0.489479	0.851498
P13676	ACPH_RAT	Acylamino-acid-releasing enzyme OS=Rattus norvegicus GN=Apeh PE=1 SV=1	0.0790321	0.492957	0.851498
Q9WVA1	TIM8A_RAT	Mitochondrial import inner membrane translocase subunit Tim8 A OS=Rattus norvegicus GN=Timm8a PE=1 SV=1	0.0738848	0.488029	0.851498
Q62813	LSAMP_RAT	Limbic system-associated membrane protein OS=Rattus norvegicus GN=Lsamp PE=1 SV=1	0.0491846	0.495555	0.851498
Q9JLA3	UGGG1_RAT	UDP-glucose:glycoprotein glucosyltransferase 1 OS=Rattus norvegicus GN=Uggt1 PE=1 SV=2	0.0459306	0.488853	0.851498
P60892	PRPS1_RAT	Ribose-phosphate pyrophosphokinase 1 OS=Rattus norvegicus GN=Prps1 PE=1 SV=2	0.0435457	0.494153	0.851498
D3ZAF6	ATPK_RAT	ATP synthase subunit f, mitochondrial OS=Rattus norvegicus GN=Atp5j2 PE=1 SV=1	0.0408171	0.484537	0.851498
Q6AY30	SCPDL_RAT	Saccharopine dehydrogenase-like oxidoreductase OS=Rattus norvegicus GN=Sccpdh PE=2 SV=1	0.0358123	0.492342	0.851498
P21708	MK03_RAT	Mitogen-activated protein kinase 3 OS=Rattus norvegicus GN=Mapk3 PE=1 SV=5	-0.0393461	0.487848	0.851498
P04182	OAT_RAT	Ornithine aminotransferase, mitochondrial OS=Rattus norvegicus GN=Oat PE=1 SV=1	-0.0402754	0.488383	0.851498
P05712	RAB2A_RAT	Ras-related protein Rab-2A OS=Rattus norvegicus GN=Rab2a PE=1 SV=1	-0.0416535	0.49687	0.851498
Q5U2P0	DI3L1_RAT	DIS3-like exonuclease 1 OS=Rattus norvegicus GN=Dis3l PE=2 SV=2	-0.0489811	0.491517	0.851498
P62329	TYB4_RAT	Thymosin beta-4 OS=Rattus norvegicus GN=Tmsb4x PE=2 SV=2	-0.051068	0.496688	0.851498
P24268	CATD_RAT	Cathepsin D OS=Rattus norvegicus GN=Ctsd PE=1 SV=1	-0.0605617	0.489886	0.851498
O88994	MOSC2_RAT	MOSC domain-containing protein 2, mitochondrial OS=Rattus norvegicus GN=Marc2 PE=2 SV=1	-0.0694168	0.484519	0.851498
Q5BJW5	LUR1L_RAT	Leucine rich adaptor protein 1-like OS=Rattus norvegicus GN=Lurap1l PE=2 SV=1	-0.0800438	0.496704	0.851498
P40307	PSB2_RAT	Proteasome subunit beta type-2 OS=Rattus norvegicus GN=Psmb2 PE=1 SV=1	-0.117587	0.497744	0.851498
P40748	SYT3_RAT	Synaptotagmin-3 OS=Rattus norvegicus GN=Syt3 PE=1 SV=1	-0.131379	0.486533	0.851498
Q6AYQ8	FAHD1_RAT	Acylpyruvase FAHD1, mitochondrial OS=Rattus norvegicus GN=Fahd1 PE=2 SV=1	-0.0698329	0.500685	0.855002
Q9Z1Y3	CADH2_RAT	Cadherin-2 OS=Rattus norvegicus GN=Cdh2 PE=1 SV=1	-0.0592276	0.502994	0.857059
P20651	PP2BB_RAT	Serine/threonine-protein phosphatase 2B catalytic subunit beta isoform OS=Rattus norvegicus GN=Ppp3cb PE=2 SV=1	-0.0613556	0.503679	0.857059
Q63092	CAMKV_RAT	CaM kinase-like vesicle-associated protein OS=Rattus norvegicus GN=Camkv PE=1 SV=1	0.0526763	0.506785	0.860816
P07895	SODM_RAT	Superoxide dismutase [Mn], mitochondrial OS=Rattus norvegicus GN=Sod2 PE=1 SV=2	0.0459178	0.508094	0.861512
Q9Z0W5	PACN1_RAT	Protein kinase C and casein kinase substrate in neurons protein 1 OS=Rattus norvegicus GN=Pacsin1 PE=1 SV=1	-0.0316784	0.510978	0.86487
O08557	DDAH1_RAT	N(G),N(G)-dimethylarginine dimethylaminohydrolase 1 OS=Rattus norvegicus GN=Ddah1 PE=1 SV=3	-0.0444515	0.513376	0.867397
O54975	XPP1_RAT	Xaa-Pro aminopeptidase 1 OS=Rattus norvegicus GN=Xpnpep1 PE=1 SV=1	0.130043	0.517916	0.867894
Q04400	ADCY5_RAT	Adenylate cyclase type 5 OS=Rattus norvegicus GN=Adcy5 PE=2 SV=2	0.0956653	0.517478	0.867894
Q6P6R2	DLDH_RAT	Dihydrolipoyl dehydrogenase, mitochondrial OS=Rattus norvegicus GN=Dld PE=1 SV=1	0.0545885	0.5182	0.867894
Q9QZR6	SEPT9_RAT	Septin-9 OS=Rattus norvegicus GN=Sept9 PE=1 SV=1	-0.0442358	0.515027	0.867894
P63170	DYL1_RAT	Dynein light chain 1, cytoplasmic OS=Rattus norvegicus GN=Dynll1 PE=1 SV=1	-0.0827818	0.515519	0.867894
Q6JE36	NDRG1_RAT	Protein NDRG1 OS=Rattus norvegicus GN=Ndrg1 PE=1 SV=1	-0.0810702	0.519971	0.86934
Q64591	DECR_RAT	2,4-dienoyl-CoA reductase, mitochondrial OS=Rattus norvegicus GN=Decr1 PE=1 SV=2	0.0710912	0.521763	0.86983
P06761	GRP78_RAT	78 kDa glucose-regulated protein OS=Rattus norvegicus GN=Hspa5 PE=1 SV=1	-0.0361639	0.522747	0.86983
Q8K4G6	MACD1_RAT	O-acetyl-ADP-ribose deacetylase MACROD1 (Fragment) OS=Rattus norvegicus GN=Macrod1 PE=2 SV=2	-0.0471014	0.522988	0.86983
Q62915	CSKP_RAT	Peripheral plasma membrane protein CASK OS=Rattus norvegicus GN=Cask PE=1 SV=1	0.0315932	0.524227	0.870017
P85845	FSCN1_RAT	Fascin OS=Rattus norvegicus GN=Fscn1 PE=1 SV=2	-0.0564045	0.524916	0.870017
Q5XIJ4	F210A_RAT	Protein FAM210A OS=Rattus norvegicus GN=Fam210a PE=2 SV=1	0.101917	0.528143	0.871967
Q99M75	RTN4R_RAT	Reticulon-4 receptor OS=Rattus norvegicus GN=Rtn4r PE=1 SV=2	0.0975052	0.531541	0.871967
P26772	CH10_RAT	10 kDa heat shock protein, mitochondrial OS=Rattus norvegicus GN=Hspe1 PE=1 SV=3	0.0482157	0.530421	0.871967
Q9Z270	VAPA_RAT	Vesicle-associated membrane protein-associated protein A OS=Rattus norvegicus GN=Vapa PE=1 SV=3	0.0250653	0.529181	0.871967
P49187	MK10_RAT	Mitogen-activated protein kinase 10 OS=Rattus norvegicus GN=Mapk10 PE=1 SV=2	-0.0659744	0.527506	0.871967
Q9JJ50	HGS_RAT	Hepatocyte growth factor-regulated tyrosine kinase substrate OS=Rattus norvegicus GN=Hgs PE=1 SV=1	-0.135537	0.531554	0.871967
Q9QYU4	CRYM_RAT	Thiomorpholine-carboxylate dehydrogenase OS=Rattus norvegicus GN=Crym PE=1 SV=1	0.0544027	0.534126	0.872184
Q63803	GNAS1_RAT	Guanine nucleotide-binding protein G(s) subunit alpha isoforms XLas OS=Rattus norvegicus GN=Gnas PE=1 SV=3	-0.057655	0.533092	0.872184
O54922	EXOC7_RAT	Exocyst complex component 7 OS=Rattus norvegicus GN=Exoc7 PE=2 SV=1	-0.0679695	0.534418	0.872184
Q9JLJ3	AL9A1_RAT	4-trimethylaminobutyraldehyde dehydrogenase OS=Rattus norvegicus GN=Aldh9a1 PE=1 SV=1	0.111806	0.538734	0.877333
Q63100	DC1I1_RAT	Cytoplasmic dynein 1 intermediate chain 1 OS=Rattus norvegicus GN=Dync1i1 PE=1 SV=1	-0.0453649	0.539404	0.877333
Q07009	CAN2_RAT	Calpain-2 catalytic subunit OS=Rattus norvegicus GN=Capn2 PE=1 SV=3	-0.122541	0.540576	0.877748
Q02563	SV2A_RAT	Synaptic vesicle glycoprotein 2A OS=Rattus norvegicus GN=Sv2a PE=1 SV=2	0.0401021	0.545539	0.881326
Q6P6S0	SNP47_RAT	Synaptosomal-associated protein 47 OS=Rattus norvegicus GN=Snap47 PE=2 SV=1	-0.0409936	0.54416	0.881326
D3ZFB6	PRRT2_RAT	Proline-rich transmembrane protein 2 OS=Rattus norvegicus GN=Prrt2 PE=1 SV=1	-0.0789531	0.544897	0.881326
P24942	EAA1_RAT	Excitatory amino acid transporter 1 OS=Rattus norvegicus GN=Slc1a3 PE=1 SV=2	0.0774083	0.546559	0.881487
G3V7P1	STX12_RAT	Syntaxin-12 OS=Rattus norvegicus GN=Stx12 PE=1 SV=1	-0.0369402	0.548208	0.882661
Q6AYS4	FUCO2_RAT	Plasma alpha-L-fucosidase OS=Rattus norvegicus GN=Fuca2 PE=2 SV=1	0.072699	0.555864	0.883342
Q8VII6	CTL1_RAT	Choline transporter-like protein 1 OS=Rattus norvegicus GN=Slc44a1 PE=1 SV=1	0.0721747	0.551564	0.883342
P84087	CPLX2_RAT	Complexin-2 OS=Rattus norvegicus GN=Cplx2 PE=1 SV=1	0.0692171	0.558995	0.883342
Q6P799	SYSC_RAT	Serine--tRNA ligase, cytoplasmic OS=Rattus norvegicus GN=Sars PE=1 SV=3	0.0374143	0.557776	0.883342
B2GV06	SCOT1_RAT	Succinyl-CoA:3-ketoacid coenzyme A transferase 1, mitochondrial OS=Rattus norvegicus GN=Oxct1 PE=1 SV=1	0.0315963	0.55027	0.883342
P09527	RAB7A_RAT	Ras-related protein Rab-7a OS=Rattus norvegicus GN=Rab7a PE=1 SV=2	-0.0214303	0.558811	0.883342
P63045	VAMP2_RAT	Vesicle-associated membrane protein 2 OS=Rattus norvegicus GN=Vamp2 PE=1 SV=2	-0.0274769	0.559449	0.883342
P35704	PRDX2_RAT	Peroxiredoxin-2 OS=Rattus norvegicus GN=Prdx2 PE=1 SV=3	-0.0396908	0.559696	0.883342
P10860	DHE3_RAT	Glutamate dehydrogenase 1, mitochondrial OS=Rattus norvegicus GN=Glud1 PE=1 SV=2	-0.042442	0.556516	0.883342
P12839	NFM_RAT	Neurofilament medium polypeptide OS=Rattus norvegicus GN=Nefm PE=1 SV=4	-0.0761091	0.554482	0.883342
P24155	THOP1_RAT	Thimet oligopeptidase OS=Rattus norvegicus GN=Thop1 PE=1 SV=4	-0.0785302	0.555011	0.883342
Q63342	M2GD_RAT	Dimethylglycine dehydrogenase, mitochondrial OS=Rattus norvegicus GN=Dmgdh PE=1 SV=1	-0.0827095	0.551492	0.883342
P07943	ALDR_RAT	Aldose reductase OS=Rattus norvegicus GN=Akr1b1 PE=1 SV=3	-0.0430344	0.560675	0.883432
P27682	7B2_RAT	Neuroendocrine protein 7B2 OS=Rattus norvegicus GN=Scg5 PE=1 SV=1	0.0597757	0.564349	0.884302
P18886	CPT2_RAT	Carnitine O-palmitoyltransferase 2, mitochondrial OS=Rattus norvegicus GN=Cpt2 PE=1 SV=1	0.0463574	0.567374	0.884302
P63012	RAB3A_RAT	Ras-related protein Rab-3A OS=Rattus norvegicus GN=Rab3a PE=1 SV=1	0.0356892	0.57038	0.884302
Q6AXX6	F213A_RAT	Redox-regulatory protein FAM213A OS=Rattus norvegicus GN=Fam213a PE=1 SV=1	0.0319558	0.567442	0.884302
Q68FQ0	TCPE_RAT	T-complex protein 1 subunit epsilon OS=Rattus norvegicus GN=Cct5 PE=1 SV=1	0.0284132	0.567709	0.884302
O08839	BIN1_RAT	Myc box-dependent-interacting protein 1 OS=Rattus norvegicus GN=Bin1 PE=1 SV=1	0.0269212	0.568546	0.884302
Q01728	NAC1_RAT	Sodium/calcium exchanger 1 OS=Rattus norvegicus GN=Slc8a1 PE=2 SV=3	0.0251166	0.567093	0.884302
Q68FS4	AMPL_RAT	Cytosol aminopeptidase OS=Rattus norvegicus GN=Lap3 PE=1 SV=1	-0.0350728	0.571009	0.884302
Q62784	INP4A_RAT	Type I inositol 3,4-bisphosphate 4-phosphatase OS=Rattus norvegicus GN=Inpp4a PE=1 SV=1	-0.037885	0.572304	0.884302
P14841	CYTC_RAT	Cystatin-C OS=Rattus norvegicus GN=Cst3 PE=1 SV=2	-0.0577616	0.570682	0.884302
Q4FZT9	PSMD2_RAT	26S proteasome non-ATPase regulatory subunit 2 OS=Rattus norvegicus GN=Psmd2 PE=2 SV=1	-0.0585438	0.567389	0.884302
Q9EQX9	UBE2N_RAT	Ubiquitin-conjugating enzyme E2 N OS=Rattus norvegicus GN=Ube2n PE=1 SV=1	-0.0688001	0.571633	0.884302
P54290	CA2D1_RAT	Voltage-dependent calcium channel subunit alpha-2/delta-1 OS=Rattus norvegicus GN=Cacna2d1 PE=1 SV=1	0.0619116	0.574075	0.885609
P36876	2ABA_RAT	Serine/threonine-protein phosphatase 2A 55 kDa regulatory subunit B alpha isoform OS=Rattus norvegicus GN=Ppp2r2a PE=2 SV=1	0.0554785	0.577759	0.886235
Q5QD51	AKA12_RAT	A-kinase anchor protein 12 OS=Rattus norvegicus GN=Akap12 PE=1 SV=1	0.0373719	0.57818	0.886235
P47727	CBR1_RAT	Carbonyl reductase [NADPH] 1 OS=Rattus norvegicus GN=Cbr1 PE=1 SV=2	-0.0434192	0.577636	0.886235
Q9Z2L9	NDRG4_RAT	Protein NDRG4 OS=Rattus norvegicus GN=Ndrg4 PE=2 SV=1	-0.0477173	0.577645	0.886235
P12075	COX5B_RAT	Cytochrome c oxidase subunit 5B, mitochondrial OS=Rattus norvegicus GN=Cox5b PE=1 SV=2	0.0495838	0.581706	0.890215
Q6PEC0	AP4A_RAT	Bis(5'-nucleosyl)-tetraphosphatase [asymmetrical] OS=Rattus norvegicus GN=Nudt2 PE=2 SV=3	-0.0414547	0.583724	0.890458
P60841	ENSA_RAT	Alpha-endosulfine OS=Rattus norvegicus GN=Ensa PE=1 SV=1	-0.0459634	0.583005	0.890458
Q9JJM9	SEPT5_RAT	Septin-5 OS=Rattus norvegicus GN=Sept5 PE=1 SV=2	0.0282557	0.585729	0.891445
P61203	CSN2_RAT	COP9 signalosome complex subunit 2 OS=Rattus norvegicus GN=Cops2 PE=2 SV=1	-0.0640868	0.586232	0.891445
O35567	PUR9_RAT	Bifunctional purine biosynthesis protein PURH OS=Rattus norvegicus GN=Atic PE=1 SV=2	0.0482887	0.588535	0.892114
P83868	TEBP_RAT	Prostaglandin E synthase 3 OS=Rattus norvegicus GN=Ptges3 PE=1 SV=2	0.0221812	0.588011	0.892114
P24587	AKAP5_RAT	A-kinase anchor protein 5 OS=Rattus norvegicus GN=Akap5 PE=2 SV=2	-0.0765125	0.58982	0.892651
P85971	6PGL_RAT	6-phosphogluconolactonase OS=Rattus norvegicus GN=Pgls PE=1 SV=1	0.0665509	0.59425	0.893087
P62775	MTPN_RAT	Myotrophin OS=Rattus norvegicus GN=Mtpn PE=1 SV=2	0.0455373	0.59392	0.893087
Q02253	MMSA_RAT	Methylmalonate-semialdehyde dehydrogenase [acylating], mitochondrial OS=Rattus norvegicus GN=Aldh6a1 PE=1 SV=1	-0.0326467	0.596199	0.893087
P00388	NCPR_RAT	NADPH--cytochrome P450 reductase OS=Rattus norvegicus GN=Por PE=1 SV=3	-0.0348739	0.596635	0.893087
Q63598	PLST_RAT	Plastin-3 OS=Rattus norvegicus GN=Pls3 PE=2 SV=2	-0.0376363	0.595854	0.893087
B0BNA5	COTL1_RAT	Coactosin-like protein OS=Rattus norvegicus GN=Cotl1 PE=1 SV=1	-0.0407402	0.594292	0.893087
Q68FW7	SYTM_RAT	Threonine--tRNA ligase, mitochondrial OS=Rattus norvegicus GN=Tars2 PE=2 SV=1	-0.0661154	0.596367	0.893087
P02688	MBP_RAT	Myelin basic protein S OS=Rattus norvegicus GN=Mbp PE=1 SV=3	0.114377	0.597937	0.893282
O35509	RB11B_RAT	Ras-related protein Rab-11B OS=Rattus norvegicus GN=Rab11b PE=2 SV=4	0.0172645	0.598629	0.893282
P42676	NEUL_RAT	Neurolysin, mitochondrial OS=Rattus norvegicus GN=Nln PE=1 SV=1	0.0327801	0.599801	0.893638
P35281	RAB10_RAT	Ras-related protein Rab-10 OS=Rattus norvegicus GN=Rab10 PE=1 SV=1	0.0321698	0.60253	0.895444
P01830	THY1_RAT	Thy-1 membrane glycoprotein OS=Rattus norvegicus GN=Thy1 PE=1 SV=1	-0.0477102	0.602883	0.895444
P63031	MPC1_RAT	Mitochondrial pyruvate carrier 1 OS=Rattus norvegicus GN=Mpc1 PE=2 SV=1	0.0664996	0.611538	0.895594
A0JPQ9	CHID1_RAT	Chitinase domain-containing protein 1 OS=Rattus norvegicus GN=Chid1 PE=2 SV=2	0.0656673	0.612157	0.895594
Q63965	SFXN1_RAT	Sideroflexin-1 OS=Rattus norvegicus GN=Sfxn1 PE=2 SV=4	0.0361755	0.607612	0.895594
Q5PPN5	TPPP3_RAT	Tubulin polymerization-promoting protein family member 3 OS=Rattus norvegicus GN=Tppp3 PE=2 SV=1	0.0345096	0.609887	0.895594
Q68FX0	IDH3B_RAT	Isocitrate dehydrogenase [NAD] subunit beta, mitochondrial OS=Rattus norvegicus GN=Idh3B PE=1 SV=1	0.030192	0.614768	0.895594
P35571	GPDM_RAT	Glycerol-3-phosphate dehydrogenase, mitochondrial OS=Rattus norvegicus GN=Gpd2 PE=1 SV=1	0.0276492	0.609225	0.895594
P31044	PEBP1_RAT	Phosphatidylethanolamine-binding protein 1 OS=Rattus norvegicus GN=Pebp1 PE=1 SV=3	-0.0211345	0.607497	0.895594
Q62868	ROCK2_RAT	Rho-associated protein kinase 2 OS=Rattus norvegicus GN=Rock2 PE=1 SV=2	-0.026826	0.616379	0.895594
Q63564	SV2B_RAT	Synaptic vesicle glycoprotein 2B OS=Rattus norvegicus GN=Sv2b PE=1 SV=1	-0.0278647	0.617006	0.895594
Q62951	DPYL4_RAT	Dihydropyrimidinase-related protein 4 (Fragment) OS=Rattus norvegicus GN=Dpysl4 PE=1 SV=1	-0.031167	0.6111	0.895594
Q64057	AL7A1_RAT	Alpha-aminoadipic semialdehyde dehydrogenase OS=Rattus norvegicus GN=Aldh7a1 PE=1 SV=2	-0.0390205	0.604672	0.895594
P57113	MAAI_RAT	Maleylacetoacetate isomerase OS=Rattus norvegicus GN=Gstz1 PE=1 SV=2	-0.0396463	0.613047	0.895594
P25122	KCNC1_RAT	Potassium voltage-gated channel subfamily C member 1 OS=Rattus norvegicus GN=Kcnc1 PE=2 SV=1	-0.0427357	0.615975	0.895594
Q68FP1	GELS_RAT	Gelsolin OS=Rattus norvegicus GN=Gsn PE=1 SV=1	-0.0486619	0.605115	0.895594
O08873	MADD_RAT	MAP kinase-activating death domain protein OS=Rattus norvegicus GN=Madd PE=1 SV=1	-0.0531674	0.614439	0.895594
Q6P9T8	TBB4B_RAT	Tubulin beta-4B chain OS=Rattus norvegicus GN=Tubb4b PE=1 SV=1	0.0608942	0.618934	0.895597
Q3T1K5	CAZA2_RAT	F-actin-capping protein subunit alpha-2 OS=Rattus norvegicus GN=Capza2 PE=1 SV=1	0.0272856	0.620825	0.895597
P41565	IDHG1_RAT	Isocitrate dehydrogenase [NAD] subunit gamma 1, mitochondrial OS=Rattus norvegicus GN=Idh3g PE=2 SV=2	0.0158113	0.621404	0.895597
Q9Z1N4	BPNT1_RAT	3'(2'),5'-bisphosphate nucleotidase 1 OS=Rattus norvegicus GN=Bpnt1 PE=1 SV=1	-0.0343203	0.621682	0.895597
Q711G3	IAH1_RAT	Isoamyl acetate-hydrolyzing esterase 1 homolog OS=Rattus norvegicus GN=Iah1 PE=2 SV=2	-0.0568273	0.619561	0.895597
O54701	NCKX2_RAT	Sodium/potassium/calcium exchanger 2 OS=Rattus norvegicus GN=Slc24a2 PE=2 SV=1	-0.0202821	0.623777	0.897266
O70277	TRIM3_RAT	Tripartite motif-containing protein 3 OS=Rattus norvegicus GN=Trim3 PE=1 SV=1	0.0406978	0.629897	0.897877
P14604	ECHM_RAT	Enoyl-CoA hydratase, mitochondrial OS=Rattus norvegicus GN=Echs1 PE=1 SV=1	0.0405774	0.636403	0.897877
Q505J6	GHC2_RAT	Mitochondrial glutamate carrier 2 OS=Rattus norvegicus GN=Slc25a18 PE=2 SV=2	0.0380782	0.636314	0.897877
P61227	RAP2B_RAT	Ras-related protein Rap-2b OS=Rattus norvegicus GN=Rap2b PE=2 SV=1	0.0369676	0.627462	0.897877
B0BNF1	SEPT8_RAT	Septin-8 OS=Rattus norvegicus GN=Sept8 PE=1 SV=1	0.031521	0.632974	0.897877
Q63754	SYUB_RAT	Beta-synuclein OS=Rattus norvegicus GN=Sncb PE=1 SV=1	0.0255517	0.635697	0.897877
P62260	1433E_RAT	14-3-3 protein epsilon OS=Rattus norvegicus GN=Ywhae PE=1 SV=1	-0.0156917	0.626961	0.897877
P45592	COF1_RAT	Cofilin-1 OS=Rattus norvegicus GN=Cfl1 PE=1 SV=3	-0.0268513	0.635408	0.897877
Q5EB77	RAB18_RAT	Ras-related protein Rab-18 OS=Rattus norvegicus GN=Rab18 PE=2 SV=1	-0.0287187	0.637324	0.897877
B0K020	CISD1_RAT	CDGSH iron-sulfur domain-containing protein 1 OS=Rattus norvegicus GN=Cisd1 PE=3 SV=1	-0.031805	0.625145	0.897877
P39052	DYN2_RAT	Dynamin-2 OS=Rattus norvegicus GN=Dnm2 PE=1 SV=1	-0.0340892	0.631629	0.897877
P23711	HMOX2_RAT	Heme oxygenase 2 OS=Rattus norvegicus GN=Hmox2 PE=1 SV=1	-0.0343416	0.635663	0.897877
O35952	GLO2_RAT	Hydroxyacylglutathione hydrolase, mitochondrial OS=Rattus norvegicus GN=Hagh PE=1 SV=2	-0.0409261	0.630233	0.897877
F1M386	RPGF2_RAT	Rap guanine nucleotide exchange factor 2 OS=Rattus norvegicus GN=Rapgef2 PE=1 SV=2	-0.0411499	0.62849	0.897877
P54921	SNAA_RAT	Alpha-soluble NSF attachment protein OS=Rattus norvegicus GN=Napa PE=1 SV=2	-0.0198257	0.639295	0.899331
P03889	NU1M_RAT	NADH-ubiquinone oxidoreductase chain 1 OS=Rattus norvegicus GN=Mtnd1 PE=1 SV=2	0.045892	0.645988	0.902124
P08050	CXA1_RAT	Gap junction alpha-1 protein OS=Rattus norvegicus GN=Gja1 PE=1 SV=2	0.044947	0.642433	0.902124
P19234	NDUV2_RAT	NADH dehydrogenase [ubiquinone] flavoprotein 2, mitochondrial OS=Rattus norvegicus GN=Ndufv2 PE=1 SV=2	0.040728	0.645044	0.902124
Q5FVH2	PLD3_RAT	Phospholipase D3 OS=Rattus norvegicus GN=Pld3 PE=2 SV=1	-0.037696	0.645587	0.902124
Q07310	NRX3A_RAT	Neurexin-3 OS=Rattus norvegicus GN=Nrxn3 PE=1 SV=1	-0.0489699	0.644033	0.902124
Q7TT49	MRCKB_RAT	Serine/threonine-protein kinase MRCK beta OS=Rattus norvegicus GN=Cdc42bpb PE=1 SV=1	0.0635077	0.647449	0.902847
P31662	S6A17_RAT	Sodium-dependent neutral amino acid transporter SLC6A17 OS=Rattus norvegicus GN=Slc6a17 PE=1 SV=1	-0.0585134	0.652653	0.908782
P07722	MAG_RAT	Myelin-associated glycoprotein OS=Rattus norvegicus GN=Mag PE=1 SV=1	0.0661389	0.659171	0.916351
P13086	SUCA_RAT	Succinyl-CoA ligase [ADP/GDP-forming] subunit alpha, mitochondrial OS=Rattus norvegicus GN=Suclg1 PE=2 SV=2	0.033596	0.660497	0.916351
O35331	PDXK_RAT	Pyridoxal kinase OS=Rattus norvegicus GN=Pdxk PE=1 SV=1	-0.0262645	0.660959	0.916351
Q5U2N3	PITM1_RAT	Membrane-associated phosphatidylinositol transfer protein 1 OS=Rattus norvegicus GN=Pitpnm1 PE=2 SV=1	0.0579171	0.674624	0.918009
Q5BJS4	FUND1_RAT	FUN14 domain-containing protein 1 OS=Rattus norvegicus GN=Fundc1 PE=2 SV=1	0.0456456	0.675329	0.918009
Q9WV97	TIM9_RAT	Mitochondrial import inner membrane translocase subunit Tim9 OS=Rattus norvegicus GN=Timm9 PE=1 SV=3	0.039245	0.678173	0.918009
D3ZZ80	OBSL1_RAT	Obscurin-like protein 1 OS=Rattus norvegicus GN=Obsl1 PE=2 SV=3	0.0343311	0.668578	0.918009
Q64568	AT2B3_RAT	Plasma membrane calcium-transporting ATPase 3 OS=Rattus norvegicus GN=Atp2b3 PE=2 SV=2	0.0318954	0.668371	0.918009
P24329	THTR_RAT	Thiosulfate sulfurtransferase OS=Rattus norvegicus GN=Tst PE=1 SV=3	0.0315454	0.673949	0.918009
Q8CFD0	SFXN5_RAT	Sideroflexin-5 OS=Rattus norvegicus GN=Sfxn5 PE=2 SV=1	0.0296398	0.67389	0.918009
P97610	SYT12_RAT	Synaptotagmin-12 OS=Rattus norvegicus GN=Syt12 PE=2 SV=1	0.0286052	0.679285	0.918009
Q5FVJ0	RUFY3_RAT	Protein RUFY3 OS=Rattus norvegicus GN=Rufy3 PE=1 SV=1	0.0285702	0.68132	0.918009
Q8R491	EHD3_RAT	EH domain-containing protein 3 OS=Rattus norvegicus GN=Ehd3 PE=1 SV=2	0.0212514	0.671535	0.918009
P50398	GDIA_RAT	Rab GDP dissociation inhibitor alpha OS=Rattus norvegicus GN=Gdi1 PE=1 SV=1	0.0177144	0.673458	0.918009
P69682	NECP1_RAT	Adaptin ear-binding coat-associated protein 1 OS=Rattus norvegicus GN=Necap1 PE=1 SV=1	-0.016274	0.671421	0.918009
Q6P502	TCPG_RAT	T-complex protein 1 subunit gamma OS=Rattus norvegicus GN=Cct3 PE=1 SV=1	-0.0219064	0.674837	0.918009
Q704E8	ABCB7_RAT	ATP-binding cassette sub-family B member 7, mitochondrial OS=Rattus norvegicus GN=Abcb7 PE=2 SV=1	-0.0237712	0.67774	0.918009
Q9R063	PRDX5_RAT	Peroxiredoxin-5, mitochondrial OS=Rattus norvegicus GN=Prdx5 PE=1 SV=1	-0.0300068	0.674039	0.918009
Q7M0E3	DEST_RAT	Destrin OS=Rattus norvegicus GN=Dstn PE=1 SV=3	-0.0325428	0.669034	0.918009
P50554	GABT_RAT	4-aminobutyrate aminotransferase, mitochondrial OS=Rattus norvegicus GN=Abat PE=1 SV=3	-0.0343427	0.677925	0.918009
P18265	GSK3A_RAT	Glycogen synthase kinase-3 alpha OS=Rattus norvegicus GN=Gsk3a PE=1 SV=1	-0.0362873	0.680562	0.918009
P68182	KAPCB_RAT	cAMP-dependent protein kinase catalytic subunit beta OS=Rattus norvegicus GN=Prkacb PE=1 SV=2	-0.0414304	0.670878	0.918009
Q63666	VAMP1_RAT	Vesicle-associated membrane protein 1 OS=Rattus norvegicus GN=Vamp1 PE=1 SV=2	-0.048536	0.680223	0.918009
P29411	KAD3_RAT	GTP:AMP phosphotransferase AK3, mitochondrial OS=Rattus norvegicus GN=Ak3 PE=2 SV=2	0.0399574	0.683822	0.918651
P37285	KLC1_RAT	Kinesin light chain 1 OS=Rattus norvegicus GN=Klc1 PE=1 SV=2	-0.0248792	0.683808	0.918651
Q7TPB1	TCPD_RAT	T-complex protein 1 subunit delta OS=Rattus norvegicus GN=Cct4 PE=1 SV=3	-0.0283353	0.684673	0.918651
Q9ES40	PRAF3_RAT	PRA1 family protein 3 OS=Rattus norvegicus GN=Arl6ip5 PE=1 SV=1	0.0245706	0.688037	0.919919
Q62950	DPYL1_RAT	Dihydropyrimidinase-related protein 1 OS=Rattus norvegicus GN=Crmp1 PE=1 SV=1	0.0198701	0.688499	0.919919
P04904	GSTA3_RAT	Glutathione S-transferase alpha-3 OS=Rattus norvegicus GN=Gsta3 PE=1 SV=3	-0.02491	0.687129	0.919919
Q9Z0V6	PRDX3_RAT	Thioredoxin-dependent peroxide reductase, mitochondrial OS=Rattus norvegicus GN=Prdx3 PE=1 SV=2	0.0287513	0.694656	0.925563
P40241	CD9_RAT	CD9 antigen OS=Rattus norvegicus GN=Cd9 PE=1 SV=2	-0.0361768	0.694062	0.925563
Q2PQA9	KINH_RAT	Kinesin-1 heavy chain OS=Rattus norvegicus GN=Kif5b PE=1 SV=1	-0.0238115	0.695885	0.925914
B2GV54	NCEH1_RAT	Neutral cholesterol ester hydrolase 1 OS=Rattus norvegicus GN=Nceh1 PE=2 SV=1	-0.024487	0.697095	0.926237
Q62812	MYH9_RAT	Myosin-9 OS=Rattus norvegicus GN=Myh9 PE=1 SV=3	-0.020087	0.699155	0.926405
Q6QIX3	ZNT3_RAT	Zinc transporter 3 OS=Rattus norvegicus GN=Slc30a3 PE=2 SV=1	-0.0337307	0.698703	0.926405
P68255	1433T_RAT	14-3-3 protein theta OS=Rattus norvegicus GN=Ywhaq PE=1 SV=1	0.0206302	0.700422	0.926802
Q07116	SUOX_RAT	Sulfite oxidase, mitochondrial OS=Rattus norvegicus GN=Suox PE=1 SV=2	0.0470686	0.705038	0.930339
P34926	MAP1A_RAT	Microtubule-associated protein 1A OS=Rattus norvegicus GN=Map1a PE=1 SV=1	0.0146272	0.704715	0.930339
Q6Q0N1	CNDP2_RAT	Cytosolic non-specific dipeptidase OS=Rattus norvegicus GN=Cndp2 PE=1 SV=1	0.033907	0.708099	0.931811
Q9R095	SPEF2_RAT	Sperm flagellar protein 2 OS=Rattus norvegicus GN=Spef2 PE=2 SV=2	0.0242917	0.707875	0.931811
P35289	RAB15_RAT	Ras-related protein Rab-15 OS=Rattus norvegicus GN=Rab15 PE=2 SV=1	0.0159911	0.711336	0.933507
Q9WVR7	PPM1F_RAT	Protein phosphatase 1F OS=Rattus norvegicus GN=Ppm1f PE=2 SV=1	-0.0218802	0.711013	0.933507
P61206	ARF3_RAT	ADP-ribosylation factor 3 OS=Rattus norvegicus GN=Arf3 PE=1 SV=2	-0.041149	0.712359	0.933571
Q6UPE1	ETFD_RAT	Electron transfer flavoprotein-ubiquinone oxidoreductase, mitochondrial OS=Rattus norvegicus GN=Etfdh PE=2 SV=1	-0.0234726	0.714843	0.935546
Q499N5	ACSF2_RAT	Acyl-CoA synthetase family member 2, mitochondrial OS=Rattus norvegicus GN=Acsf2 PE=2 SV=1	-0.0196072	0.717875	0.936954
Q78P75	DYL2_RAT	Dynein light chain 2, cytoplasmic OS=Rattus norvegicus GN=Dynll2 PE=1 SV=1	-0.0360169	0.716972	0.936954
P07825	SYPH_RAT	Synaptophysin OS=Rattus norvegicus GN=Syp PE=1 SV=1	-0.0172135	0.71932	0.937563
Q5I0P2	GCSH_RAT	Glycine cleavage system H protein, mitochondrial OS=Rattus norvegicus GN=Gcsh PE=2 SV=1	-0.0400926	0.723371	0.941562
P97526	NF1_RAT	Neurofibromin OS=Rattus norvegicus GN=Nf1 PE=1 SV=1	0.051285	0.738665	0.946246
Q8K3X8	HSBP1_RAT	Heat shock factor-binding protein 1 OS=Rattus norvegicus GN=Hsbp1 PE=3 SV=1	0.0495683	0.768319	0.946246
Q6AYS7	ACY1A_RAT	Aminoacylase-1A OS=Rattus norvegicus GN=Acy1a PE=1 SV=1	0.0475861	0.74522	0.946246
Q6PDU7	ATP5L_RAT	ATP synthase subunit g, mitochondrial OS=Rattus norvegicus GN=Atp5l PE=1 SV=2	0.0439106	0.746407	0.946246
P62074	TIM10_RAT	Mitochondrial import inner membrane translocase subunit Tim10 OS=Rattus norvegicus GN=Timm10 PE=3 SV=1	0.0337809	0.737444	0.946246
P02625	PRVA_RAT	Parvalbumin alpha OS=Rattus norvegicus GN=Pvalb PE=1 SV=2	0.0331933	0.759571	0.946246
Q05962	ADT1_RAT	ADP/ATP translocase 1 OS=Rattus norvegicus GN=Slc25a4 PE=1 SV=3	0.0323177	0.756864	0.946246
Q4KM49	SYYC_RAT	Tyrosine--tRNA ligase, cytoplasmic OS=Rattus norvegicus GN=Yars PE=2 SV=3	0.0303397	0.759976	0.946246
Q91XU8	CDS2_RAT	Phosphatidate cytidylyltransferase 2 OS=Rattus norvegicus GN=Cds2 PE=2 SV=1	0.0282158	0.766439	0.946246
Q63941	RAB3B_RAT	Ras-related protein Rab-3B OS=Rattus norvegicus GN=Rab3b PE=1 SV=2	0.0275679	0.757857	0.946246
Q09073	ADT2_RAT	ADP/ATP translocase 2 OS=Rattus norvegicus GN=Slc25a5 PE=1 SV=3	0.027518	0.766376	0.946246
P62161	CALM_RAT	Calmodulin OS=Rattus norvegicus GN=Calm1 PE=1 SV=2	0.0267896	0.752501	0.946246
P51111	HD_RAT	Huntingtin OS=Rattus norvegicus GN=Htt PE=1 SV=1	0.0248401	0.765977	0.946246
D4A6L0	GP158_RAT	Probable G-protein coupled receptor 158 OS=Rattus norvegicus GN=Gpr158 PE=3 SV=1	0.0243966	0.73504	0.946246
Q5XIT1	MARE3_RAT	Microtubule-associated protein RP/EB family member 3 OS=Rattus norvegicus GN=Mapre3 PE=1 SV=1	0.0222402	0.749559	0.946246
P63039	CH60_RAT	60 kDa heat shock protein, mitochondrial OS=Rattus norvegicus GN=Hspd1 PE=1 SV=1	0.0197354	0.747501	0.946246
Q9Z0J5	TRXR2_RAT	Thioredoxin reductase 2, mitochondrial OS=Rattus norvegicus GN=Txnrd2 PE=1 SV=3	0.0192404	0.73289	0.946246
P60522	GBRL2_RAT	Gamma-aminobutyric acid receptor-associated protein-like 2 OS=Rattus norvegicus GN=Gabarapl2 PE=3 SV=1	0.0187509	0.766273	0.946246
Q63788	P85B_RAT	Phosphatidylinositol 3-kinase regulatory subunit beta OS=Rattus norvegicus GN=Pik3r2 PE=2 SV=1	0.018692	0.742137	0.946246
P10760	SAHH_RAT	Adenosylhomocysteinase OS=Rattus norvegicus GN=Ahcy PE=1 SV=3	0.0177278	0.75539	0.946246
Q5U318	PEA15_RAT	Astrocytic phosphoprotein PEA-15 OS=Rattus norvegicus GN=Pea15 PE=1 SV=1	0.0161549	0.762813	0.946246
Q66HA8	HS105_RAT	Heat shock protein 105 kDa OS=Rattus norvegicus GN=Hsph1 PE=1 SV=1	0.0127939	0.765425	0.946246
P51635	AK1A1_RAT	Alcohol dehydrogenase [NADP(+)] OS=Rattus norvegicus GN=Akr1a1 PE=1 SV=2	0.0121925	0.73903	0.946246
Q9QUL6	NSF_RAT	Vesicle-fusing ATPase OS=Rattus norvegicus GN=Nsf PE=1 SV=1	0.00556934	0.752274	0.946246
Q6AYH5	DCTN2_RAT	Dynactin subunit 2 OS=Rattus norvegicus GN=Dctn2 PE=1 SV=1	-0.00970227	0.746096	0.946246
Q5RKI0	WDR1_RAT	WD repeat-containing protein 1 OS=Rattus norvegicus GN=Wdr1 PE=1 SV=3	-0.0127661	0.7668	0.946246
P35434	ATPD_RAT	ATP synthase subunit delta, mitochondrial OS=Rattus norvegicus GN=Atp5d PE=1 SV=2	-0.0161923	0.736942	0.946246
P52303	AP1B1_RAT	AP-1 complex subunit beta-1 OS=Rattus norvegicus GN=Ap1b1 PE=1 SV=1	-0.0189617	0.761194	0.946246
O88637	PCY2_RAT	Ethanolamine-phosphate cytidylyltransferase OS=Rattus norvegicus GN=Pcyt2 PE=1 SV=1	-0.0203289	0.758716	0.946246
P35738	ODBB_RAT	2-oxoisovalerate dehydrogenase subunit beta, mitochondrial OS=Rattus norvegicus GN=Bckdhb PE=1 SV=3	-0.0229224	0.745907	0.946246
Q4V7D2	ROGDI_RAT	Protein rogdi homolog OS=Rattus norvegicus GN=Rogdi PE=2 SV=1	-0.0230729	0.758784	0.946246
P22063	CNTN2_RAT	Contactin-2 OS=Rattus norvegicus GN=Cntn2 PE=1 SV=1	-0.0253698	0.754345	0.946246
P15087	CBPE_RAT	Carboxypeptidase E OS=Rattus norvegicus GN=Cpe PE=1 SV=1	-0.028225	0.756146	0.946246
P27791	KAPCA_RAT	cAMP-dependent protein kinase catalytic subunit alpha OS=Rattus norvegicus GN=Prkaca PE=1 SV=2	-0.0292533	0.730274	0.946246
Q4QQT4	2AAB_RAT	Serine/threonine-protein phosphatase 2A 65 kDa regulatory subunit A beta isoform OS=Rattus norvegicus GN=Ppp2r1b PE=2 SV=1	-0.0304568	0.730298	0.946246
Q3ZB98	BCAS1_RAT	Breast carcinoma-amplified sequence 1 homolog (Fragment) OS=Rattus norvegicus GN=Bcas1 PE=1 SV=2	-0.0328583	0.768455	0.946246
Q5MPA9	DCLK2_RAT	Serine/threonine-protein kinase DCLK2 OS=Rattus norvegicus GN=Dclk2 PE=1 SV=2	-0.0329752	0.766465	0.946246
Q1WIM1	CADM4_RAT	Cell adhesion molecule 4 OS=Rattus norvegicus GN=Cadm4 PE=1 SV=1	-0.0334074	0.761074	0.946246
Q6MG12	CF136_RAT	Uncharacterized protein C6orf136 homolog OS=Rattus norvegicus PE=2 SV=1	-0.0419842	0.73773	0.946246
P04631	S100B_RAT	Protein S100-B OS=Rattus norvegicus GN=S100b PE=1 SV=2	-0.0431616	0.730712	0.946246
P23348	B3A3_RAT	Anion exchange protein 3 OS=Rattus norvegicus GN=Slc4a3 PE=2 SV=1	-0.0612972	0.768284	0.946246
P01946	HBA_RAT	Hemoglobin subunit alpha-1/2 OS=Rattus norvegicus GN=Hba1 PE=1 SV=3	-0.0682789	0.733783	0.946246
P17220	PSA2_RAT	Proteasome subunit alpha type-2 OS=Rattus norvegicus GN=Psma2 PE=1 SV=3	-0.0448638	0.770349	0.947362
Q6QLM7	KIF5A_RAT	Kinesin heavy chain isoform 5A OS=Rattus norvegicus GN=Kif5a PE=1 SV=1	-0.0236314	0.772058	0.948246
Q58FK9	KAT3_RAT	Kynurenine--oxoglutarate transaminase 3 OS=Rattus norvegicus GN=Ccbl2 PE=2 SV=1	0.0116659	0.773438	0.948724
Q712U5	ARP19_RAT	cAMP-regulated phosphoprotein 19 OS=Rattus norvegicus GN=Arpp19 PE=1 SV=3	-0.0189824	0.775854	0.950471
Q63345	MOG_RAT	Myelin-oligodendrocyte glycoprotein OS=Rattus norvegicus GN=Mog PE=1 SV=1	0.0525761	0.779028	0.953141
P16884	NFH_RAT	Neurofilament heavy polypeptide OS=Rattus norvegicus GN=Nefh PE=1 SV=4	0.0573436	0.787193	0.957425
Q9Z2S9	FLOT2_RAT	Flotillin-2 OS=Rattus norvegicus GN=Flot2 PE=1 SV=1	0.0285282	0.786223	0.957425
Q4FZT0	STML2_RAT	Stomatin-like protein 2, mitochondrial OS=Rattus norvegicus GN=Stoml2 PE=1 SV=1	0.0203011	0.789362	0.957425
P22062	PIMT_RAT	Protein-L-isoaspartate(D-aspartate) O-methyltransferase OS=Rattus norvegicus GN=Pcmt1 PE=1 SV=2	0.0151865	0.790317	0.957425
Q9QZA2	PDC6I_RAT	Programmed cell death 6-interacting protein OS=Rattus norvegicus GN=Pdcd6ip PE=1 SV=2	-0.018052	0.784383	0.957425
Q6AY84	SCRN1_RAT	Secernin-1 OS=Rattus norvegicus GN=Scrn1 PE=1 SV=1	-0.0190553	0.789661	0.957425
Q5RKI1	IF4A2_RAT	Eukaryotic initiation factor 4A-II OS=Rattus norvegicus GN=Eif4a2 PE=1 SV=1	-0.0265383	0.788048	0.957425
Q9JJP9	UBQL1_RAT	Ubiquilin-1 OS=Rattus norvegicus GN=Ubqln1 PE=1 SV=1	-0.0418974	0.790525	0.957425
P50503	F10A1_RAT	Hsc70-interacting protein OS=Rattus norvegicus GN=St13 PE=1 SV=1	0.0219249	0.792531	0.958643
P02650	APOE_RAT	Apolipoprotein E OS=Rattus norvegicus GN=Apoe PE=1 SV=2	-0.0331547	0.793903	0.95909
P28042	SSBP_RAT	Single-stranded DNA-binding protein, mitochondrial OS=Rattus norvegicus GN=Ssbp1 PE=1 SV=2	0.0410362	0.798904	0.959392
P05503	COX1_RAT	Cytochrome c oxidase subunit 1 OS=Rattus norvegicus GN=Mtco1 PE=2 SV=2	0.0255826	0.800087	0.959392
Q6AXT5	RAB21_RAT	Ras-related protein Rab-21 OS=Rattus norvegicus GN=Rab21 PE=2 SV=1	0.0227296	0.799888	0.959392
O35764	NPTXR_RAT	Neuronal pentraxin receptor OS=Rattus norvegicus GN=Nptxr PE=1 SV=1	0.0201976	0.806788	0.959392
Q01066	PDE1B_RAT	Calcium/calmodulin-dependent 3',5'-cyclic nucleotide phosphodiesterase 1B OS=Rattus norvegicus GN=Pde1b PE=2 SV=1	0.0160117	0.808172	0.959392
P26284	ODPA_RAT	Pyruvate dehydrogenase E1 component subunit alpha, somatic form, mitochondrial OS=Rattus norvegicus GN=Pdha1 PE=1 SV=2	0.0116627	0.804073	0.959392
P62898	CYC_RAT	Cytochrome c, somatic OS=Rattus norvegicus GN=Cycs PE=1 SV=2	0.0102566	0.797797	0.959392
P85834	EFTU_RAT	Elongation factor Tu, mitochondrial OS=Rattus norvegicus GN=Tufm PE=1 SV=1	0.00875689	0.803778	0.959392
P60711	ACTB_RAT	Actin, cytoplasmic 1 OS=Rattus norvegicus GN=Actb PE=1 SV=1	-0.00915768	0.804992	0.959392
P07633	PCCB_RAT	Propionyl-CoA carboxylase beta chain, mitochondrial OS=Rattus norvegicus GN=Pccb PE=2 SV=1	-0.0142437	0.802343	0.959392
Q9EPC6	PROF2_RAT	Profilin-2 OS=Rattus norvegicus GN=Pfn2 PE=1 SV=3	-0.0174543	0.806979	0.959392
P50475	SYAC_RAT	Alanine--tRNA ligase, cytoplasmic OS=Rattus norvegicus GN=Aars PE=1 SV=3	-0.0220212	0.807844	0.959392
P0C5X8	TTYH1_RAT	Protein tweety homolog 1 OS=Rattus norvegicus GN=Ttyh1 PE=2 SV=1	-0.0287828	0.798094	0.959392
P50904	RASA1_RAT	Ras GTPase-activating protein 1 OS=Rattus norvegicus GN=Rasa1 PE=3 SV=1	-0.0415872	0.801244	0.959392
P62813	GBRA1_RAT	Gamma-aminobutyric acid receptor subunit alpha-1 OS=Rattus norvegicus GN=Gabra1 PE=1 SV=1	0.0526589	0.81125	0.960665
Q9JJ31	CUL5_RAT	Cullin-5 OS=Rattus norvegicus GN=Cul5 PE=1 SV=3	0.0234917	0.810912	0.960665
Q6MG60	DDAH2_RAT	N(G),N(G)-dimethylarginine dimethylaminohydrolase 2 OS=Rattus norvegicus GN=Ddah2 PE=1 SV=1	0.0168823	0.816284	0.960733
Q63617	HYOU1_RAT	Hypoxia up-regulated protein 1 OS=Rattus norvegicus GN=Hyou1 PE=1 SV=1	0.0167077	0.815068	0.960733
Q5HZV9	PP1R7_RAT	Protein phosphatase 1 regulatory subunit 7 OS=Rattus norvegicus GN=Ppp1r7 PE=1 SV=1	0.015876	0.817325	0.960733
O35458	VIAAT_RAT	Vesicular inhibitory amino acid transporter OS=Rattus norvegicus GN=Slc32a1 PE=1 SV=1	-0.00952033	0.812766	0.960733
P16036	MPCP_RAT	Phosphate carrier protein, mitochondrial OS=Rattus norvegicus GN=Slc25a3 PE=1 SV=1	-0.0132329	0.814949	0.960733
P11030	ACBP_RAT	Acyl-CoA-binding protein OS=Rattus norvegicus GN=Dbi PE=1 SV=3	-0.0232552	0.817251	0.960733
P31422	GRM3_RAT	Metabotropic glutamate receptor 3 OS=Rattus norvegicus GN=Grm3 PE=1 SV=1	0.0252947	0.825401	0.963051
P62828	RAN_RAT	GTP-binding nuclear protein Ran OS=Rattus norvegicus GN=Ran PE=1 SV=3	0.0201111	0.831431	0.963051
P25235	RPN2_RAT	Dolichyl-diphosphooligosaccharide--protein glycosyltransferase subunit 2 OS=Rattus norvegicus GN=Rpn2 PE=2 SV=2	0.0189256	0.832022	0.963051
P47971	NPTX1_RAT	Neuronal pentraxin-1 OS=Rattus norvegicus GN=Nptx1 PE=1 SV=1	0.0184006	0.821582	0.963051
Q6AYR2	NDRG3_RAT	Protein NDRG3 OS=Rattus norvegicus GN=Ndrg3 PE=2 SV=1	0.0176172	0.832355	0.963051
P28023	DCTN1_RAT	Dynactin subunit 1 OS=Rattus norvegicus GN=Dctn1 PE=1 SV=2	0.0128667	0.832366	0.963051
Q68FR6	EF1G_RAT	Elongation factor 1-gamma OS=Rattus norvegicus GN=Eef1g PE=1 SV=3	-0.00996609	0.832241	0.963051
P63100	CANB1_RAT	Calcineurin subunit B type 1 OS=Rattus norvegicus GN=Ppp3r1 PE=1 SV=2	-0.0106706	0.831497	0.963051
P09951	SYN1_RAT	Synapsin-1 OS=Rattus norvegicus GN=Syn1 PE=1 SV=3	-0.0118122	0.826889	0.963051
Q9WTT6	GUAD_RAT	Guanine deaminase OS=Rattus norvegicus GN=Gda PE=1 SV=1	-0.0122913	0.8244	0.963051
P55161	NCKP1_RAT	Nck-associated protein 1 OS=Rattus norvegicus GN=Nckap1 PE=2 SV=1	-0.0131675	0.828062	0.963051
P05370	G6PD_RAT	Glucose-6-phosphate 1-dehydrogenase OS=Rattus norvegicus GN=G6pdx PE=1 SV=3	-0.0170708	0.821691	0.963051
P00762	TRY1_RAT	Anionic trypsin-1 OS=Rattus norvegicus GN=Prss1 PE=1 SV=1	-0.0267951	0.82576	0.963051
Q9Z272	GIT1_RAT	ARF GTPase-activating protein GIT1 OS=Rattus norvegicus GN=Git1 PE=1 SV=1	0.0277292	0.836091	0.963489
Q8K3M6	ERC2_RAT	ERC protein 2 OS=Rattus norvegicus GN=Erc2 PE=1 SV=1	0.0264793	0.840391	0.963489
Q63081	PDIA6_RAT	Protein disulfide-isomerase A6 OS=Rattus norvegicus GN=Pdia6 PE=1 SV=2	0.0236363	0.839235	0.963489
P18508	GBRG2_RAT	Gamma-aminobutyric acid receptor subunit gamma-2 OS=Rattus norvegicus GN=Gabrg2 PE=1 SV=1	0.0210092	0.838377	0.963489
Q4TU93	MRC2_RAT	C-type mannose receptor 2 OS=Rattus norvegicus GN=Mrc2 PE=1 SV=1	0.0184647	0.837858	0.963489
Q6P7S1	ASAH1_RAT	Acid ceramidase OS=Rattus norvegicus GN=Asah1 PE=2 SV=1	0.0167406	0.840851	0.963489
P56603	SCAM1_RAT	Secretory carrier-associated membrane protein 1 OS=Rattus norvegicus GN=Scamp1 PE=1 SV=1	0.0150318	0.836508	0.963489
Q9WVB1	RAB6A_RAT	Ras-related protein Rab-6A OS=Rattus norvegicus GN=Rab6a PE=2 SV=2	0.00830464	0.841796	0.963489
Q9ESW0	DDB1_RAT	DNA damage-binding protein 1 OS=Rattus norvegicus GN=Ddb1 PE=2 SV=1	-0.0184436	0.840653	0.963489
F1LYQ8	FARP1_RAT	FERM, RhoGEF and pleckstrin domain-containing protein 1 OS=Rattus norvegicus GN=Farp1 PE=1 SV=2	0.0304496	0.867098	0.966341
Q63524	TMED2_RAT	Transmembrane emp24 domain-containing protein 2 OS=Rattus norvegicus GN=Tmed2 PE=1 SV=1	0.0267464	0.876481	0.966341
P32736	OPCM_RAT	Opioid-binding protein/cell adhesion molecule OS=Rattus norvegicus GN=Opcml PE=1 SV=2	0.0231571	0.851896	0.966341
Q3B8Q0	MARE2_RAT	Microtubule-associated protein RP/EB family member 2 OS=Rattus norvegicus GN=Mapre2 PE=2 SV=1	0.019906	0.862317	0.966341
P15791	KCC2D_RAT	Calcium/calmodulin-dependent protein kinase type II subunit delta OS=Rattus norvegicus GN=Camk2d PE=1 SV=1	0.0180517	0.875913	0.966341
P29994	ITPR1_RAT	Inositol 1,4,5-trisphosphate receptor type 1 OS=Rattus norvegicus GN=Itpr1 PE=1 SV=2	0.0163899	0.883043	0.966341
Q5M7A7	CNRP1_RAT	CB1 cannabinoid receptor-interacting protein 1 OS=Rattus norvegicus GN=Cnrip1 PE=1 SV=1	0.0161779	0.858654	0.966341
Q1AAU6	ASAP1_RAT	Arf-GAP with SH3 domain, ANK repeat and PH domain-containing protein 1 OS=Rattus norvegicus GN=Asap1 PE=2 SV=2	0.0158422	0.855624	0.966341
O35964	SH3G1_RAT	Endophilin-A2 OS=Rattus norvegicus GN=Sh3gl1 PE=1 SV=1	0.0154503	0.882227	0.966341
P0DJJ3	SGIP1_RAT	SH3-containing GRB2-like protein 3-interacting protein 1 OS=Rattus norvegicus GN=Sgip1 PE=1 SV=1	0.0142831	0.862936	0.966341
D3ZQG6	TRIM2_RAT	Tripartite motif-containing protein 2 OS=Rattus norvegicus GN=Trim2 PE=1 SV=2	0.0139033	0.886531	0.966341
B0BNM9	GLTP_RAT	Glycolipid transfer protein OS=Rattus norvegicus GN=GLTP PE=2 SV=1	0.0125636	0.887602	0.966341
Q68FY0	QCR1_RAT	Cytochrome b-c1 complex subunit 1, mitochondrial OS=Rattus norvegicus GN=Uqcrc1 PE=1 SV=1	0.0124788	0.880972	0.966341
Q9JLT0	MYH10_RAT	Myosin-10 OS=Rattus norvegicus GN=Myh10 PE=1 SV=1	0.0108497	0.866103	0.966341
P17764	THIL_RAT	Acetyl-CoA acetyltransferase, mitochondrial OS=Rattus norvegicus GN=Acat1 PE=1 SV=1	0.0102904	0.887045	0.966341
P47858	K6PF_RAT	6-phosphofructokinase, muscle type OS=Rattus norvegicus GN=Pfkm PE=2 SV=3	0.0102436	0.874174	0.966341
Q80ZA5	S4A10_RAT	Sodium-driven chloride bicarbonate exchanger OS=Rattus norvegicus GN=Slc4a10 PE=2 SV=1	0.00997256	0.890961	0.966341
P04775	SCN2A_RAT	Sodium channel protein type 2 subunit alpha OS=Rattus norvegicus GN=Scn2a PE=1 SV=1	0.00979537	0.864991	0.966341
P11980	KPYM_RAT	Pyruvate kinase isozymes M1/M2 OS=Rattus norvegicus GN=Pkm PE=1 SV=3	0.00884228	0.888359	0.966341
P14882	PCCA_RAT	Propionyl-CoA carboxylase alpha chain, mitochondrial OS=Rattus norvegicus GN=Pcca PE=1 SV=3	0.00847464	0.859708	0.966341
P97536	CAND1_RAT	Cullin-associated NEDD8-dissociated protein 1 OS=Rattus norvegicus GN=Cand1 PE=1 SV=1	0.00846787	0.855046	0.966341
P63102	1433Z_RAT	14-3-3 protein zeta/delta OS=Rattus norvegicus GN=Ywhaz PE=1 SV=1	0.0080716	0.879966	0.966341
P05065	ALDOA_RAT	Fructose-bisphosphate aldolase A OS=Rattus norvegicus GN=Aldoa PE=1 SV=2	0.00770981	0.855402	0.966341
Q63198	CNTN1_RAT	Contactin-1 OS=Rattus norvegicus GN=Cntn1 PE=1 SV=2	0.00756749	0.875349	0.966341
Q64548	RTN1_RAT	Reticulon-1 OS=Rattus norvegicus GN=Rtn1 PE=2 SV=1	0.0070685	0.872675	0.966341
Q07647	GTR3_RAT	Solute carrier family 2, facilitated glucose transporter member 3 OS=Rattus norvegicus GN=Slc2a3 PE=1 SV=1	0.00684695	0.872988	0.966341
P10111	PPIA_RAT	Peptidyl-prolyl cis-trans isomerase A OS=Rattus norvegicus GN=Ppia PE=1 SV=2	0.00662797	0.871254	0.966341
P16086	SPTN1_RAT	Spectrin alpha chain, non-erythrocytic 1 OS=Rattus norvegicus GN=Sptan1 PE=1 SV=2	0.00523069	0.891697	0.966341
P56571	ES1_RAT	ES1 protein homolog, mitochondrial OS=Rattus norvegicus PE=1 SV=2	-0.0058946	0.874694	0.966341
Q9WTP0	E41L1_RAT	Band 4.1-like protein 1 OS=Rattus norvegicus GN=Epb41l1 PE=1 SV=1	-0.00681574	0.885292	0.966341
Q62876	SNG1_RAT	Synaptogyrin-1 OS=Rattus norvegicus GN=Syngr1 PE=2 SV=1	-0.00997779	0.86952	0.966341
Q9QXU9	PCSK1_RAT	ProSAAS OS=Rattus norvegicus GN=Pcsk1n PE=1 SV=1	-0.0101168	0.875835	0.966341
Q6AY19	ADCK4_RAT	Uncharacterized aarF domain-containing protein kinase 4 OS=Rattus norvegicus GN=Adck4 PE=2 SV=1	-0.0101636	0.89082	0.966341
P11232	THIO_RAT	Thioredoxin OS=Rattus norvegicus GN=Txn PE=1 SV=2	-0.0120836	0.855022	0.966341
P49803	RGS7_RAT	Regulator of G-protein signaling 7 OS=Rattus norvegicus GN=Rgs7 PE=2 SV=2	-0.0128562	0.846627	0.966341
P12711	ADHX_RAT	Alcohol dehydrogenase class-3 OS=Rattus norvegicus GN=Adh5 PE=1 SV=2	-0.0145586	0.885105	0.966341
Q6XVN8	MLP3A_RAT	Microtubule-associated proteins 1A/1B light chain 3A OS=Rattus norvegicus GN=Map1lc3a PE=1 SV=1	-0.0176634	0.868441	0.966341
P35467	S10A1_RAT	Protein S100-A1 OS=Rattus norvegicus GN=S100a1 PE=1 SV=3	-0.0190714	0.876634	0.966341
Q5I0C3	MCCA_RAT	Methylcrotonoyl-CoA carboxylase subunit alpha, mitochondrial OS=Rattus norvegicus GN=Mccc1 PE=1 SV=1	-0.0192731	0.880708	0.966341
P70627	FOLH1_RAT	Glutamate carboxypeptidase 2 OS=Rattus norvegicus GN=Folh1 PE=2 SV=1	-0.0198405	0.867573	0.966341
P11517	HBB2_RAT	Hemoglobin subunit beta-2 OS=Rattus norvegicus PE=1 SV=2	-0.0234962	0.889902	0.966341
Q4KM98	MFF_RAT	Mitochondrial fission factor OS=Rattus norvegicus GN=Mff PE=2 SV=1	-0.0235225	0.862619	0.966341
Q04940	NEUG_RAT	Neurogranin OS=Rattus norvegicus GN=Nrgn PE=1 SV=1	-0.0275635	0.8729	0.966341
P97615	THIOM_RAT	Thioredoxin, mitochondrial OS=Rattus norvegicus GN=Txn2 PE=2 SV=1	-0.0323037	0.869998	0.966341
Q62745	CD81_RAT	CD81 antigen OS=Rattus norvegicus GN=Cd81 PE=1 SV=1	-0.0330249	0.866003	0.966341
Q5XIG4	OCAD1_RAT	OCIA domain-containing protein 1 OS=Rattus norvegicus GN=Ociad1 PE=2 SV=1	-0.0385204	0.889697	0.966341
P02091	HBB1_RAT	Hemoglobin subunit beta-1 OS=Rattus norvegicus GN=Hbb PE=1 SV=3	-0.0425893	0.854566	0.966341
P15650	ACADL_RAT	Long-chain specific acyl-CoA dehydrogenase, mitochondrial OS=Rattus norvegicus GN=Acadl PE=1 SV=1	0.00762538	0.893721	0.966348
O35112	CD166_RAT	CD166 antigen OS=Rattus norvegicus GN=Alcam PE=1 SV=1	-0.00853299	0.893468	0.966348
Q8K4F8	CCNF_RAT	Cyclin-F OS=Rattus norvegicus GN=Ccnf PE=2 SV=2	0.0158035	0.895075	0.966721
P30009	MARCS_RAT	Myristoylated alanine-rich C-kinase substrate OS=Rattus norvegicus GN=Marcks PE=1 SV=2	0.00482242	0.896613	0.967292
Q8K4M9	OSBL1_RAT	Oxysterol-binding protein-related protein 1 OS=Rattus norvegicus GN=Osbpl1a PE=1 SV=1	-0.0148857	0.898131	0.96784
Q6AYQ4	TM109_RAT	Transmembrane protein 109 OS=Rattus norvegicus GN=Tmem109 PE=2 SV=1	-0.0166109	0.900341	0.969131
Q68FW9	CSN3_RAT	COP9 signalosome complex subunit 3 OS=Rattus norvegicus GN=Cops3 PE=2 SV=1	0.0225557	0.908759	0.969541
Q9R0I8	PI42A_RAT	Phosphatidylinositol 5-phosphate 4-kinase type-2 alpha OS=Rattus norvegicus GN=Pip4k2a PE=1 SV=1	0.0181712	0.905355	0.969541
P47860	K6PP_RAT	6-phosphofructokinase type C OS=Rattus norvegicus GN=Pfkp PE=1 SV=2	0.0120265	0.9038	0.969541
Q5XIN6	LETM1_RAT	LETM1 and EF-hand domain-containing protein 1, mitochondrial OS=Rattus norvegicus GN=Letm1 PE=1 SV=1	0.00602512	0.902127	0.969541
Q9WVK7	HCDH_RAT	Hydroxyacyl-coenzyme A dehydrogenase, mitochondrial OS=Rattus norvegicus GN=Hadh PE=2 SV=1	-0.00650125	0.906	0.969541
Q63525	NUDC_RAT	Nuclear migration protein nudC OS=Rattus norvegicus GN=Nudc PE=1 SV=1	-0.00712127	0.908651	0.969541
Q03555	GEPH_RAT	Gephyrin OS=Rattus norvegicus GN=Gphn PE=1 SV=3	-0.0121006	0.908818	0.969541
P25093	FAAA_RAT	Fumarylacetoacetase OS=Rattus norvegicus GN=Fah PE=1 SV=1	-0.0156076	0.903497	0.969541
O54715	VAS1_RAT	V-type proton ATPase subunit S1 OS=Rattus norvegicus GN=Atp6ap1 PE=2 SV=1	0.013965	0.911722	0.971557
P20650	PPM1A_RAT	Protein phosphatase 1A OS=Rattus norvegicus GN=Ppm1a PE=1 SV=1	0.0222607	0.913186	0.972036
P36201	CRIP2_RAT	Cysteine-rich protein 2 OS=Rattus norvegicus GN=Crip2 PE=2 SV=1	0.0180179	0.917877	0.975945
P04906	GSTP1_RAT	Glutathione S-transferase P OS=Rattus norvegicus GN=Gstp1 PE=1 SV=2	0.00619215	0.923834	0.97749
Q8VHF5	CISY_RAT	Citrate synthase, mitochondrial OS=Rattus norvegicus GN=Cs PE=1 SV=1	0.0061487	0.924704	0.97749
O55012	PICAL_RAT	Phosphatidylinositol-binding clathrin assembly protein OS=Rattus norvegicus GN=Picalm PE=1 SV=1	0.00534607	0.930246	0.97749
Q5XIE6	HIBCH_RAT	3-hydroxyisobutyryl-CoA hydrolase, mitochondrial OS=Rattus norvegicus GN=Hibch PE=1 SV=2	0.00477045	0.936769	0.97749
Q99NA5	IDH3A_RAT	Isocitrate dehydrogenase [NAD] subunit alpha, mitochondrial OS=Rattus norvegicus GN=Idh3a PE=1 SV=1	0.00280519	0.936342	0.97749
Q5XI78	ODO1_RAT	2-oxoglutarate dehydrogenase, mitochondrial OS=Rattus norvegicus GN=Ogdh PE=1 SV=1	-0.00256809	0.927547	0.97749
O35814	STIP1_RAT	Stress-induced-phosphoprotein 1 OS=Rattus norvegicus GN=Stip1 PE=1 SV=1	-0.00367427	0.934369	0.97749
P42123	LDHB_RAT	L-lactate dehydrogenase B chain OS=Rattus norvegicus GN=Ldhb PE=1 SV=2	-0.0050494	0.925359	0.97749
P56558	OGT1_RAT	UDP-N-acetylglucosamine--peptide N-acetylglucosaminyltransferase 110 kDa subunit OS=Rattus norvegicus GN=Ogt PE=1 SV=1	-0.00524618	0.930618	0.97749
Q5M9G9	TBRG4_RAT	Protein TBRG4 OS=Rattus norvegicus GN=Tbrg4 PE=2 SV=1	-0.0054216	0.933643	0.97749
Q6AYR6	HDHD2_RAT	Haloacid dehalogenase-like hydrolase domain-containing protein 2 OS=Rattus norvegicus GN=Hdhd2 PE=2 SV=1	-0.0057048	0.925441	0.97749
Q01986	MP2K1_RAT	Dual specificity mitogen-activated protein kinase kinase 1 OS=Rattus norvegicus GN=Map2k1 PE=1 SV=2	-0.00587424	0.934944	0.97749
P48037	ANXA6_RAT	Annexin A6 OS=Rattus norvegicus GN=Anxa6 PE=1 SV=2	-0.00658301	0.931209	0.97749
P32089	TXTP_RAT	Tricarboxylate transport protein, mitochondrial OS=Rattus norvegicus GN=Slc25a1 PE=1 SV=1	-0.00720978	0.937696	0.97749
O55145	X3CL1_RAT	Fractalkine OS=Rattus norvegicus GN=Cx3cl1 PE=2 SV=3	-0.00914726	0.923585	0.97749
P18666	ML12B_RAT	Myosin regulatory light chain 12B OS=Rattus norvegicus GN=Myl12b PE=1 SV=3	-0.0119341	0.936419	0.97749
Q66HR5	CACO1_RAT	Calcium-binding and coiled-coil domain-containing protein 1 OS=Rattus norvegicus GN=Calcoco1 PE=2 SV=1	-0.0138778	0.930097	0.97749
Q5XI83	CP062_RAT	UPF0505 protein C16orf62 homolog OS=Rattus norvegicus PE=2 SV=1	-0.0250735	0.930872	0.97749
P12369	KAP3_RAT	cAMP-dependent protein kinase type II-beta regulatory subunit OS=Rattus norvegicus GN=Prkar2b PE=1 SV=3	-0.00402585	0.941311	0.979522
P62963	PROF1_RAT	Profilin-1 OS=Rattus norvegicus GN=Pfn1 PE=1 SV=2	-0.00594736	0.94169	0.979522
P63055	PCP4_RAT	Purkinje cell protein 4 OS=Rattus norvegicus GN=Pcp4 PE=1 SV=2	0.00399116	0.94695	0.982858
P19643	AOFB_RAT	Amine oxidase [flavin-containing] B OS=Rattus norvegicus GN=Maob PE=1 SV=3	0.00398718	0.946723	0.982858
Q62991	SCFD1_RAT	Sec1 family domain-containing protein 1 OS=Rattus norvegicus GN=Scfd1 PE=1 SV=1	0.00652282	0.954438	0.98686
Q03114	CDK5_RAT	Cyclin-dependent kinase 5 OS=Rattus norvegicus GN=Cdk5 PE=1 SV=1	0.00468137	0.954926	0.98686
P13264	GLSK_RAT	Glutaminase kidney isoform, mitochondrial OS=Rattus norvegicus GN=Gls PE=1 SV=2	0.00337833	0.954298	0.98686
Q71UE8	NEDD8_RAT	NEDD8 OS=Rattus norvegicus GN=Nedd8 PE=1 SV=1	-0.00899374	0.952346	0.98686
Q63531	KS6A1_RAT	Ribosomal protein S6 kinase alpha-1 OS=Rattus norvegicus GN=Rps6ka1 PE=1 SV=1	0.00585684	0.960877	0.987454
Q5RKI8	ABCB8_RAT	ATP-binding cassette sub-family B member 8, mitochondrial OS=Rattus norvegicus GN=Abcb8 PE=2 SV=1	0.00404833	0.963525	0.987454
P62944	AP2B1_RAT	AP-2 complex subunit beta OS=Rattus norvegicus GN=Ap2b1 PE=1 SV=1	-0.00162295	0.963512	0.987454
P55051	FABP7_RAT	Fatty acid-binding protein, brain OS=Rattus norvegicus GN=Fabp7 PE=1 SV=2	-0.00298597	0.964778	0.987454
B2RYW9	FAHD2_RAT	Fumarylacetoacetate hydrolase domain-containing protein 2 OS=Rattus norvegicus GN=Fahd2 PE=1 SV=1	-0.00303604	0.964029	0.987454
P10362	SCG2_RAT	Secretogranin-2 OS=Rattus norvegicus GN=Scg2 PE=2 SV=1	-0.00439381	0.957794	0.987454
P63329	PP2BA_RAT	Serine/threonine-protein phosphatase 2B catalytic subunit alpha isoform OS=Rattus norvegicus GN=Ppp3ca PE=1 SV=1	-0.00457642	0.960855	0.987454
Q5XI72	IF4H_RAT	Eukaryotic translation initiation factor 4H OS=Rattus norvegicus GN=Eif4h PE=1 SV=1	-0.00503053	0.963359	0.987454
P26817	ARBK1_RAT	Beta-adrenergic receptor kinase 1 OS=Rattus norvegicus GN=Adrbk1 PE=2 SV=1	-0.0122409	0.959075	0.987454
Q9Z339	GSTO1_RAT	Glutathione S-transferase omega-1 OS=Rattus norvegicus GN=Gsto1 PE=1 SV=2	-0.00167947	0.968849	0.987539
P26453	BASI_RAT	Basigin OS=Rattus norvegicus GN=Bsg PE=1 SV=2	-0.00239971	0.968984	0.987539
Q6RJR6	RTN3_RAT	Reticulon-3 OS=Rattus norvegicus GN=Rtn3 PE=1 SV=1	-0.00240742	0.967984	0.987539
P85968	6PGD_RAT	6-phosphogluconate dehydrogenase, decarboxylating OS=Rattus norvegicus GN=Pgd PE=1 SV=1	-0.00308786	0.966282	0.987539
Q5U2Z3	NP1L4_RAT	Nucleosome assembly protein 1-like 4 OS=Rattus norvegicus GN=Nap1l4 PE=2 SV=1	0.00235971	0.971088	0.988631
D4A7N1	CHCH6_RAT	Coiled-coil-helix-coiled-coil-helix domain-containing protein 6, mitochondrial OS=Rattus norvegicus GN=Chchd6 PE=2 SV=1	0.00320832	0.977705	0.993071
P18266	GSK3B_RAT	Glycogen synthase kinase-3 beta OS=Rattus norvegicus GN=Gsk3b PE=1 SV=1	0.00254909	0.980399	0.993071
P97685	NFASC_RAT	Neurofascin OS=Rattus norvegicus GN=Nfasc PE=1 SV=2	0.0010882	0.982627	0.993071
Q64536	PDK2_RAT	[Pyruvate dehydrogenase [lipoamide]] kinase isozyme 2, mitochondrial OS=Rattus norvegicus GN=Pdk2 PE=1 SV=1	-0.000944077	0.981571	0.993071
P07632	SODC_RAT	Superoxide dismutase [Cu-Zn] OS=Rattus norvegicus GN=Sod1 PE=1 SV=2	-0.00106462	0.980024	0.993071
Q9QXU8	DC1L1_RAT	Cytoplasmic dynein 1 light intermediate chain 1 OS=Rattus norvegicus GN=Dync1li1 PE=1 SV=1	-0.00125849	0.982209	0.993071
P97546	NPTN_RAT	Neuroplastin OS=Rattus norvegicus GN=Nptn PE=1 SV=2	-0.001421	0.982705	0.993071
Q5I0G4	SYG_RAT	Glycine--tRNA ligase (Fragment) OS=Rattus norvegicus GN=Gars PE=1 SV=1	0.00159262	0.983783	0.993113
Q1WIM3	CADM3_RAT	Cell adhesion molecule 3 OS=Rattus norvegicus GN=Cadm3 PE=2 SV=1	-0.00103288	0.985685	0.993182
Q1HCL7	NAKD1_RAT	NAD kinase domain-containing protein 1, mitochondrial OS=Rattus norvegicus GN=Nadkd1 PE=2 SV=1	-0.00137749	0.985925	0.993182
Q5PPH0	ENOPH_RAT	Enolase-phosphatase E1 OS=Rattus norvegicus GN=Enoph1 PE=2 SV=1	0.00125252	0.988804	0.995036
P70584	ACDSB_RAT	Short/branched chain specific acyl-CoA dehydrogenase, mitochondrial OS=Rattus norvegicus GN=Acadsb PE=1 SV=1	0.00238577	0.990536	0.995733
P10824	GNAI1_RAT	Guanine nucleotide-binding protein G(i) subunit alpha-1 OS=Rattus norvegicus GN=Gnai1 PE=1 SV=3	0.000783265	0.991753	0.995911
P12368	KAP2_RAT	cAMP-dependent protein kinase type II-alpha regulatory subunit OS=Rattus norvegicus GN=Prkar2a PE=1 SV=3	-0.000681123	0.993671	0.996793
P35465	PAK1_RAT	Serine/threonine-protein kinase PAK 1 OS=Rattus norvegicus GN=Pak1 PE=1 SV=3	-0.000459249	0.995202	0.997284
Q1WIM2	CADM2_RAT	Cell adhesion molecule 2 OS=Rattus norvegicus GN=Cadm2 PE=1 SV=2	0.000355711	0.99709	0.998132
Q62696	DLG1_RAT	Disks large homolog 1 OS=Rattus norvegicus GN=Dlg1 PE=1 SV=1	0.000126472	0.999131	0.999131

## Sheet: Mouse Cytosol Enriched
Entry	Entry Name	Description	Log2(DJ-1 KO/WT)	Raw P Value	BH Adjusted P Value
Q99LX0	PARK7_MOUSE	Protein deglycase DJ-1 OS=Mus musculus GN=Park7 PE=1 SV=1	-1.99948	1.43e-07	0.000105777
P17710	HXK1_MOUSE	Hexokinase-1 OS=Mus musculus GN=Hk1 PE=1 SV=3	0.338258	1.16e-05	0.00431514
O54865	GCYB1_MOUSE	Guanylate cyclase soluble subunit beta-1 OS=Mus musculus GN=Gucy1b3 PE=1 SV=1	-0.241182	0.00120311	0.29757
P08551	NFL_MOUSE	Neurofilament light polypeptide OS=Mus musculus GN=Nefl PE=1 SV=5	-0.298	0.00253949	0.461874
P08553	NFM_MOUSE	Neurofilament medium polypeptide OS=Mus musculus GN=Nefm PE=1 SV=4	-0.266575	0.0043573	0.461874
P19246	NFH_MOUSE	Neurofilament heavy polypeptide OS=Mus musculus GN=Nefh PE=1 SV=3	-0.196584	0.00407082	0.461874
P31750	AKT1_MOUSE	RAC-alpha serine/threonine-protein kinase OS=Mus musculus GN=Akt1 PE=1 SV=2	0.328421	0.00420067	0.461874
Q91XL9	OSBL1_MOUSE	Oxysterol-binding protein-related protein 1 OS=Mus musculus GN=Osbpl1a PE=1 SV=2	-0.086927	0.00553482	0.513355
P06801	MAOX_MOUSE	NADP-dependent malic enzyme OS=Mus musculus GN=Me1 PE=1 SV=2	0.16847	0.00998337	0.823074
A2ALS5	RPGP1_MOUSE	Rap1 GTPase-activating protein 1 OS=Mus musculus GN=Rap1gap PE=1 SV=2	-0.0498071	0.538285	0.9992
A2AQ07	TBB1_MOUSE	Tubulin beta-1 chain OS=Mus musculus GN=Tubb1 PE=1 SV=1	-0.103624	0.21859	0.9992
A2RT62	FXL16_MOUSE	F-box/LRR-repeat protein 16 OS=Mus musculus GN=Fbxl16 PE=1 SV=1	0.0420832	0.682915	0.9992
A6H630	ARMT1_MOUSE	Protein-glutamate O-methyltransferase OS=Mus musculus GN=Armt1 PE=1 SV=1	0.103362	0.485979	0.9992
B9EKR1	PRPTZ_MOUSE	Receptor-type tyrosine-protein phosphatase zeta OS=Mus musculus GN=Ptprz1 PE=1 SV=1	-0.0523824	0.303144	0.9992
O08529	CAN2_MOUSE	Calpain-2 catalytic subunit OS=Mus musculus GN=Capn2 PE=1 SV=4	0.0600918	0.305933	0.9992
O08539	BIN1_MOUSE	Myc box-dependent-interacting protein 1 OS=Mus musculus GN=Bin1 PE=1 SV=1	0.0755009	0.607191	0.9992
O08553	DPYL2_MOUSE	Dihydropyrimidinase-related protein 2 OS=Mus musculus GN=Dpysl2 PE=1 SV=2	-0.0577872	0.536524	0.9992
O08585	CLCA_MOUSE	Clathrin light chain A OS=Mus musculus GN=Clta PE=1 SV=2	-0.0220294	0.747498	0.9992
O08599	STXB1_MOUSE	Syntaxin-binding protein 1 OS=Mus musculus GN=Stxbp1 PE=1 SV=2	-0.0326358	0.702035	0.9992
O08709	PRDX6_MOUSE	Peroxiredoxin-6 OS=Mus musculus GN=Prdx6 PE=1 SV=3	-0.0504432	0.182094	0.9992
O08759	UBE3A_MOUSE	Ubiquitin-protein ligase E3A OS=Mus musculus GN=Ube3a PE=1 SV=2	-0.328142	0.356504	0.9992
O08997	ATOX1_MOUSE	Copper transport protein ATOX1 OS=Mus musculus GN=Atox1 PE=1 SV=1	-0.0394701	0.585694	0.9992
O09061	PSB1_MOUSE	Proteasome subunit beta type-1 OS=Mus musculus GN=Psmb1 PE=1 SV=1	0.0845544	0.608262	0.9992
O09131	GSTO1_MOUSE	Glutathione S-transferase omega-1 OS=Mus musculus GN=Gsto1 PE=1 SV=2	0.219462	0.184059	0.9992
O35098	DPYL4_MOUSE	Dihydropyrimidinase-related protein 4 OS=Mus musculus GN=Dpysl4 PE=1 SV=1	0.0234039	0.713627	0.9992
O35295	PURB_MOUSE	Transcriptional activator protein Pur-beta OS=Mus musculus GN=Purb PE=1 SV=3	0.0898507	0.270783	0.9992
O35343	IMA3_MOUSE	Importin subunit alpha-3 OS=Mus musculus GN=Kpna4 PE=1 SV=1	-0.0403255	0.850116	0.9992
O35381	AN32A_MOUSE	Acidic leucine-rich nuclear phosphoprotein 32 family member A OS=Mus musculus GN=Anp32a PE=1 SV=1	-0.0317359	0.426136	0.9992
O35639	ANXA3_MOUSE	Annexin A3 OS=Mus musculus GN=Anxa3 PE=1 SV=4	-0.0985019	0.538385	0.9992
O35643	AP1B1_MOUSE	AP-1 complex subunit beta-1 OS=Mus musculus GN=Ap1b1 PE=1 SV=2	-0.0480286	0.497558	0.9992
O35685	NUDC_MOUSE	Nuclear migration protein nudC OS=Mus musculus GN=Nudc PE=1 SV=1	0.162657	0.0157795	0.9992
O35864	CSN5_MOUSE	COP9 signalosome complex subunit 5 OS=Mus musculus GN=Cops5 PE=1 SV=3	0.0135372	0.804664	0.9992
O54774	AP3D1_MOUSE	AP-3 complex subunit delta-1 OS=Mus musculus GN=Ap3d1 PE=1 SV=1	0.0383685	0.779951	0.9992
O54916	REPS1_MOUSE	RalBP1-associated Eps domain-containing protein 1 OS=Mus musculus GN=Reps1 PE=1 SV=2	0.0785438	0.525662	0.9992
O54983	CRYM_MOUSE	Ketimine reductase mu-crystallin OS=Mus musculus GN=Crym PE=1 SV=1	-0.0390873	0.571818	0.9992
O55023	IMPA1_MOUSE	Inositol monophosphatase 1 OS=Mus musculus GN=Impa1 PE=1 SV=1	-0.0790996	0.283244	0.9992
O55042	SYUA_MOUSE	Alpha-synuclein OS=Mus musculus GN=Snca PE=1 SV=2	-0.044117	0.237387	0.9992
O70172	PI42A_MOUSE	Phosphatidylinositol 5-phosphate 4-kinase type-2 alpha OS=Mus musculus GN=Pip4k2a PE=1 SV=1	0.0571693	0.470839	0.9992
O70251	EF1B_MOUSE	Elongation factor 1-beta OS=Mus musculus GN=Eef1b PE=1 SV=5	0.141443	0.31022	0.9992
O70310	NMT1_MOUSE	Glycylpeptide N-tetradecanoyltransferase 1 OS=Mus musculus GN=Nmt1 PE=1 SV=1	0.106763	0.425157	0.9992
O70435	PSA3_MOUSE	Proteasome subunit alpha type-3 OS=Mus musculus GN=Psma3 PE=1 SV=3	0.246087	0.119942	0.9992
O70591	PFD2_MOUSE	Prefoldin subunit 2 OS=Mus musculus GN=Pfdn2 PE=1 SV=2	0.067201	0.459635	0.9992
O88342	WDR1_MOUSE	WD repeat-containing protein 1 OS=Mus musculus GN=Wdr1 PE=1 SV=3	-0.00817461	0.836519	0.9992
O88543	CSN3_MOUSE	COP9 signalosome complex subunit 3 OS=Mus musculus GN=Cops3 PE=1 SV=3	0.00346143	0.955968	0.9992
O88544	CSN4_MOUSE	COP9 signalosome complex subunit 4 OS=Mus musculus GN=Cops4 PE=1 SV=1	-0.0068663	0.925671	0.9992
O88545	CSN6_MOUSE	COP9 signalosome complex subunit 6 OS=Mus musculus GN=Cops6 PE=1 SV=1	-0.043981	0.722919	0.9992
O88643	PAK1_MOUSE	Serine/threonine-protein kinase PAK 1 OS=Mus musculus GN=Pak1 PE=1 SV=1	-0.00765097	0.92063	0.9992
O88685	PRS6A_MOUSE	26S protease regulatory subunit 6A OS=Mus musculus GN=Psmc3 PE=1 SV=2	-0.136954	0.575006	0.9992
O88746	TOM1_MOUSE	Target of Myb protein 1 OS=Mus musculus GN=Tom1 PE=1 SV=1	0.179841	0.265444	0.9992
O88844	IDHC_MOUSE	Isocitrate dehydrogenase [NADP] cytoplasmic OS=Mus musculus GN=Idh1 PE=1 SV=2	0.057244	0.270133	0.9992
O88935	SYN1_MOUSE	Synapsin-1 OS=Mus musculus GN=Syn1 PE=1 SV=2	0.106662	0.522288	0.9992
O88958	GNPI1_MOUSE	Glucosamine-6-phosphate isomerase 1 OS=Mus musculus GN=Gnpda1 PE=1 SV=3	-0.0129676	0.876659	0.9992
O89053	COR1A_MOUSE	Coronin-1A OS=Mus musculus GN=Coro1a PE=1 SV=5	-0.143883	0.134121	0.9992
O89112	LANC1_MOUSE	LanC-like protein 1 OS=Mus musculus GN=Lancl1 PE=1 SV=1	-0.103838	0.297783	0.9992
P00493	HPRT_MOUSE	Hypoxanthine-guanine phosphoribosyltransferase OS=Mus musculus GN=Hprt1 PE=1 SV=3	0.089659	0.306283	0.9992
P00920	CAH2_MOUSE	Carbonic anhydrase 2 OS=Mus musculus GN=Ca2 PE=1 SV=4	-0.0343263	0.556494	0.9992
P01942	HBA_MOUSE	Hemoglobin subunit alpha OS=Mus musculus GN=Hba PE=1 SV=2	0.124575	0.390764	0.9992
P02088	HBB1_MOUSE	Hemoglobin subunit beta-1 OS=Mus musculus GN=Hbb-b1 PE=1 SV=2	0.087726	0.555442	0.9992
P03995	GFAP_MOUSE	Glial fibrillary acidic protein OS=Mus musculus GN=Gfap PE=1 SV=4	-0.311414	0.0182443	0.9992
P05063	ALDOC_MOUSE	Fructose-bisphosphate aldolase C OS=Mus musculus GN=Aldoc PE=1 SV=4	0.0431999	0.239555	0.9992
P05064	ALDOA_MOUSE	Fructose-bisphosphate aldolase A OS=Mus musculus GN=Aldoa PE=1 SV=2	0.117092	0.151541	0.9992
P05201	AATC_MOUSE	Aspartate aminotransferase, cytoplasmic OS=Mus musculus GN=Got1 PE=1 SV=3	0.202602	0.444707	0.9992
P06151	LDHA_MOUSE	L-lactate dehydrogenase A chain OS=Mus musculus GN=Ldha PE=1 SV=3	-0.0219136	0.610106	0.9992
P06745	G6PI_MOUSE	Glucose-6-phosphate isomerase OS=Mus musculus GN=Gpi PE=1 SV=4	0.0165796	0.789331	0.9992
P07724	ALBU_MOUSE	Serum albumin OS=Mus musculus GN=Alb PE=1 SV=3	0.0175798	0.907297	0.9992
P07901	HS90A_MOUSE	Heat shock protein HSP 90-alpha OS=Mus musculus GN=Hsp90aa1 PE=1 SV=4	0.0253948	0.425478	0.9992
P08226	APOE_MOUSE	Apolipoprotein E OS=Mus musculus GN=Apoe PE=1 SV=2	0.0933441	0.136092	0.9992
P08228	SODC_MOUSE	Superoxide dismutase [Cu-Zn] OS=Mus musculus GN=Sod1 PE=1 SV=2	-0.0225894	0.681373	0.9992
P08249	MDHM_MOUSE	Malate dehydrogenase, mitochondrial OS=Mus musculus GN=Mdh2 PE=1 SV=3	-0.088173	0.448304	0.9992
P08414	KCC4_MOUSE	Calcium/calmodulin-dependent protein kinase type IV OS=Mus musculus GN=Camk4 PE=1 SV=2	-0.031094	0.607114	0.9992
P09405	NUCL_MOUSE	Nucleolin OS=Mus musculus GN=Ncl PE=1 SV=2	0.0302682	0.509369	0.9992
P09411	PGK1_MOUSE	Phosphoglycerate kinase 1 OS=Mus musculus GN=Pgk1 PE=1 SV=4	0.00211884	0.93616	0.9992
P09813	APOA2_MOUSE	Apolipoprotein A-II OS=Mus musculus GN=Apoa2 PE=1 SV=2	0.0948353	0.509582	0.9992
P10126	EF1A1_MOUSE	Elongation factor 1-alpha 1 OS=Mus musculus GN=Eef1a1 PE=1 SV=3	-0.0100471	0.869978	0.9992
P10630	IF4A2_MOUSE	Eukaryotic initiation factor 4A-II OS=Mus musculus GN=Eif4a2 PE=1 SV=2	0.0274906	0.730803	0.9992
P10637	TAU_MOUSE	Microtubule-associated protein tau OS=Mus musculus GN=Mapt PE=1 SV=3	-0.0112916	0.833279	0.9992
P10639	THIO_MOUSE	Thioredoxin OS=Mus musculus GN=Txn PE=1 SV=3	0.00258574	0.965963	0.9992
P10649	GSTM1_MOUSE	Glutathione S-transferase Mu 1 OS=Mus musculus GN=Gstm1 PE=1 SV=2	-0.0325193	0.517419	0.9992
P11031	TCP4_MOUSE	Activated RNA polymerase II transcriptional coactivator p15 OS=Mus musculus GN=Sub1 PE=1 SV=3	0.0597808	0.307459	0.9992
P11404	FABPH_MOUSE	Fatty acid-binding protein, heart OS=Mus musculus GN=Fabp3 PE=1 SV=5	-0.0957247	0.156553	0.9992
P11499	HS90B_MOUSE	Heat shock protein HSP 90-beta OS=Mus musculus GN=Hsp90ab1 PE=1 SV=3	-0.00134805	0.979712	0.9992
P11798	KCC2A_MOUSE	Calcium/calmodulin-dependent protein kinase type II subunit alpha OS=Mus musculus GN=Camk2a PE=1 SV=2	-0.0155692	0.905893	0.9992
P11983	TCPA_MOUSE	T-complex protein 1 subunit alpha OS=Mus musculus GN=Tcp1 PE=1 SV=3	0.0284814	0.513971	0.9992
P12382	PFKAL_MOUSE	ATP-dependent 6-phosphofructokinase, liver type OS=Mus musculus GN=Pfkl PE=1 SV=4	0.0197704	0.691655	0.9992
P12658	CALB1_MOUSE	Calbindin OS=Mus musculus GN=Calb1 PE=1 SV=2	0.0144115	0.713179	0.9992
P12815	PDCD6_MOUSE	Programmed cell death protein 6 OS=Mus musculus GN=Pdcd6 PE=1 SV=2	-0.0659532	0.560349	0.9992
P12960	CNTN1_MOUSE	Contactin-1 OS=Mus musculus GN=Cntn1 PE=1 SV=1	-0.105337	0.0330012	0.9992
P13020	GELS_MOUSE	Gelsolin OS=Mus musculus GN=Gsn PE=1 SV=3	-0.0536231	0.742562	0.9992
P13634	CAH1_MOUSE	Carbonic anhydrase 1 OS=Mus musculus GN=Ca1 PE=1 SV=4	-0.0585261	0.860797	0.9992
P13707	GPDA_MOUSE	Glycerol-3-phosphate dehydrogenase [NAD(+)], cytoplasmic OS=Mus musculus GN=Gpd1 PE=1 SV=3	0.0613222	0.231296	0.9992
P14115	RL27A_MOUSE	60S ribosomal protein L27a OS=Mus musculus GN=Rpl27a PE=1 SV=5	-0.0290345	0.778979	0.9992
P14131	RS16_MOUSE	40S ribosomal protein S16 OS=Mus musculus GN=Rps16 PE=1 SV=4	0.0597821	0.322141	0.9992
P14152	MDHC_MOUSE	Malate dehydrogenase, cytoplasmic OS=Mus musculus GN=Mdh1 PE=1 SV=3	0.120011	0.379338	0.9992
P14206	RSSA_MOUSE	40S ribosomal protein SA OS=Mus musculus GN=Rpsa PE=1 SV=4	0.0128575	0.879065	0.9992
P14685	PSMD3_MOUSE	26S proteasome non-ATPase regulatory subunit 3 OS=Mus musculus GN=Psmd3 PE=1 SV=3	-0.0882709	0.230089	0.9992
P14824	ANXA6_MOUSE	Annexin A6 OS=Mus musculus GN=Anxa6 PE=1 SV=3	0.0705408	0.22864	0.9992
P14869	RLA0_MOUSE	60S acidic ribosomal protein P0 OS=Mus musculus GN=Rplp0 PE=1 SV=3	0.0225288	0.898935	0.9992
P14873	MAP1B_MOUSE	Microtubule-associated protein 1B OS=Mus musculus GN=Map1b PE=1 SV=2	0.0589626	0.370214	0.9992
P15105	GLNA_MOUSE	Glutamine synthetase OS=Mus musculus GN=Glul PE=1 SV=6	0.084733	0.581717	0.9992
P15532	NDKA_MOUSE	Nucleoside diphosphate kinase A OS=Mus musculus GN=Nme1 PE=1 SV=1	0.100581	0.316041	0.9992
P16045	LEG1_MOUSE	Galectin-1 OS=Mus musculus GN=Lgals1 PE=1 SV=3	0.0466059	0.659696	0.9992
P16054	KPCE_MOUSE	Protein kinase C epsilon type OS=Mus musculus GN=Prkce PE=1 SV=1	0.00789795	0.932167	0.9992
P16125	LDHB_MOUSE	L-lactate dehydrogenase B chain OS=Mus musculus GN=Ldhb PE=1 SV=2	-0.0279706	0.549335	0.9992
P16460	ASSY_MOUSE	Argininosuccinate synthase OS=Mus musculus GN=Ass1 PE=1 SV=1	0.174546	0.202808	0.9992
P16546	SPTN1_MOUSE	Spectrin alpha chain, non-erythrocytic 1 OS=Mus musculus GN=Sptan1 PE=1 SV=4	-0.0364424	0.595405	0.9992
P16858	G3P_MOUSE	Glyceraldehyde-3-phosphate dehydrogenase OS=Mus musculus GN=Gapdh PE=1 SV=2	-0.0214106	0.561305	0.9992
P17156	HSP72_MOUSE	Heat shock-related 70 kDa protein 2 OS=Mus musculus GN=Hspa2 PE=1 SV=2	-0.121954	0.366723	0.9992
P17182	ENOA_MOUSE	Alpha-enolase OS=Mus musculus GN=Eno1 PE=1 SV=3	-0.0696197	0.134502	0.9992
P17183	ENOG_MOUSE	Gamma-enolase OS=Mus musculus GN=Eno2 PE=1 SV=2	0.0304284	0.596829	0.9992
P17426	AP2A1_MOUSE	AP-2 complex subunit alpha-1 OS=Mus musculus GN=Ap2a1 PE=1 SV=1	0.0651365	0.118253	0.9992
P17427	AP2A2_MOUSE	AP-2 complex subunit alpha-2 OS=Mus musculus GN=Ap2a2 PE=1 SV=2	0.06024	0.227745	0.9992
P17742	PPIA_MOUSE	Peptidyl-prolyl cis-trans isomerase A OS=Mus musculus GN=Ppia PE=1 SV=2	-0.0572516	0.232063	0.9992
P17751	TPIS_MOUSE	Triosephosphate isomerase OS=Mus musculus GN=Tpi1 PE=1 SV=4	0.0281336	0.638086	0.9992
P17879	HS71B_MOUSE	Heat shock 70 kDa protein 1B OS=Mus musculus GN=Hspa1b PE=1 SV=3	-0.0493643	0.410704	0.9992
P18760	COF1_MOUSE	Cofilin-1 OS=Mus musculus GN=Cfl1 PE=1 SV=3	-0.0801485	0.207832	0.9992
P19096	FAS_MOUSE	Fatty acid synthase OS=Mus musculus GN=Fasn PE=1 SV=2	-0.0381566	0.402399	0.9992
P19157	GSTP1_MOUSE	Glutathione S-transferase P 1 OS=Mus musculus GN=Gstp1 PE=1 SV=2	0.00766553	0.876267	0.9992
P20065	TYB4_MOUSE	Thymosin beta-4 OS=Mus musculus GN=Tmsb4x PE=1 SV=1	0.0276074	0.830511	0.9992
P20357	MTAP2_MOUSE	Microtubule-associated protein 2 OS=Mus musculus GN=Map2 PE=1 SV=2	0.0606157	0.35292	0.9992
P20444	KPCA_MOUSE	Protein kinase C alpha type OS=Mus musculus GN=Prkca PE=1 SV=3	0.0319785	0.75051	0.9992
P21107	TPM3_MOUSE	Tropomyosin alpha-3 chain OS=Mus musculus GN=Tpm3 PE=1 SV=3	0.00139364	0.982136	0.9992
P23116	EIF3A_MOUSE	Eukaryotic translation initiation factor 3 subunit A OS=Mus musculus GN=Eif3a PE=1 SV=5	-0.0495258	0.726166	0.9992
P23198	CBX3_MOUSE	Chromobox protein homolog 3 OS=Mus musculus GN=Cbx3 PE=1 SV=2	-0.109303	0.403931	0.9992
P23492	PNPH_MOUSE	Purine nucleoside phosphorylase OS=Mus musculus GN=Pnp PE=1 SV=2	0.197793	0.0341997	0.9992
P23506	PIMT_MOUSE	Protein-L-isoaspartate(D-aspartate) O-methyltransferase OS=Mus musculus GN=Pcmt1 PE=1 SV=3	0.0431432	0.405644	0.9992
P24288	BCAT1_MOUSE	Branched-chain-amino-acid aminotransferase, cytosolic OS=Mus musculus GN=Bcat1 PE=1 SV=2	0.0286297	0.718458	0.9992
P24472	GSTA4_MOUSE	Glutathione S-transferase A4 OS=Mus musculus GN=Gsta4 PE=1 SV=3	-0.118517	0.267664	0.9992
P24527	LKHA4_MOUSE	Leukotriene A-4 hydrolase OS=Mus musculus GN=Lta4h PE=1 SV=4	0.0797539	0.263878	0.9992
P25444	RS2_MOUSE	40S ribosomal protein S2 OS=Mus musculus GN=Rps2 PE=1 SV=3	0.146863	0.165407	0.9992
P26638	SYSC_MOUSE	Serine--tRNA ligase, cytoplasmic OS=Mus musculus GN=Sars PE=1 SV=3	0.0621418	0.254325	0.9992
P26883	FKB1A_MOUSE	Peptidyl-prolyl cis-trans isomerase FKBP1A OS=Mus musculus GN=Fkbp1a PE=1 SV=2	-0.0292322	0.791487	0.9992
P27546	MAP4_MOUSE	Microtubule-associated protein 4 OS=Mus musculus GN=Map4 PE=1 SV=3	-0.0965388	0.465027	0.9992
P28474	ADHX_MOUSE	Alcohol dehydrogenase class-3 OS=Mus musculus GN=Adh5 PE=1 SV=3	0.0544234	0.379395	0.9992
P28650	PURA1_MOUSE	Adenylosuccinate synthetase isozyme 1 OS=Mus musculus GN=Adssl1 PE=1 SV=2	0.0632025	0.6477	0.9992
P28652	KCC2B_MOUSE	Calcium/calmodulin-dependent protein kinase type II subunit beta OS=Mus musculus GN=Camk2b PE=1 SV=2	0.0190394	0.892593	0.9992
P28656	NP1L1_MOUSE	Nucleosome assembly protein 1-like 1 OS=Mus musculus GN=Nap1l1 PE=1 SV=2	0.0488253	0.449276	0.9992
P28658	ATX10_MOUSE	Ataxin-10 OS=Mus musculus GN=Atxn10 PE=1 SV=2	-0.0298351	0.627857	0.9992
P28663	SNAB_MOUSE	Beta-soluble NSF attachment protein OS=Mus musculus GN=Napb PE=1 SV=2	0.204362	0.066084	0.9992
P28738	KIF5C_MOUSE	Kinesin heavy chain isoform 5C OS=Mus musculus GN=Kif5c PE=1 SV=3	0.114463	0.474473	0.9992
P28867	KPCD_MOUSE	Protein kinase C delta type OS=Mus musculus GN=Prkcd PE=1 SV=3	0.0548198	0.63848	0.9992
P29595	NEDD8_MOUSE	NEDD8 OS=Mus musculus GN=Nedd8 PE=1 SV=2	-0.00855302	0.890628	0.9992
P30416	FKBP4_MOUSE	Peptidyl-prolyl cis-trans isomerase FKBP4 OS=Mus musculus GN=Fkbp4 PE=1 SV=5	0.0935313	0.606195	0.9992
P31324	KAP3_MOUSE	cAMP-dependent protein kinase type II-beta regulatory subunit OS=Mus musculus GN=Prkar2b PE=1 SV=3	0.0815614	0.138864	0.9992
P31786	ACBP_MOUSE	Acyl-CoA-binding protein OS=Mus musculus GN=Dbi PE=1 SV=2	-0.0247207	0.828347	0.9992
P31938	MP2K1_MOUSE	Dual specificity mitogen-activated protein kinase kinase 1 OS=Mus musculus GN=Map2k1 PE=1 SV=2	-0.0389216	0.56669	0.9992
P32067	LA_MOUSE	Lupus La protein homolog OS=Mus musculus GN=Ssb PE=1 SV=1	0.0354541	0.606209	0.9992
P32848	PRVA_MOUSE	Parvalbumin alpha OS=Mus musculus GN=Pvalb PE=1 SV=3	0.022784	0.848209	0.9992
P32921	SYWC_MOUSE	Tryptophan--tRNA ligase, cytoplasmic OS=Mus musculus GN=Wars PE=1 SV=2	0.0146657	0.815055	0.9992
P33173	KIF1A_MOUSE	Kinesin-like protein KIF1A OS=Mus musculus GN=Kif1a PE=1 SV=2	-0.0458813	0.532538	0.9992
P34022	RANG_MOUSE	Ran-specific GTPase-activating protein OS=Mus musculus GN=Ranbp1 PE=1 SV=2	0.180201	0.0990973	0.9992
P34884	MIF_MOUSE	Macrophage migration inhibitory factor OS=Mus musculus GN=Mif PE=1 SV=2	0.0552093	0.647775	0.9992
P34914	HYES_MOUSE	Bifunctional epoxide hydrolase 2 OS=Mus musculus GN=Ephx2 PE=1 SV=2	-0.234651	0.276066	0.9992
P35235	PTN11_MOUSE	Tyrosine-protein phosphatase non-receptor type 11 OS=Mus musculus GN=Ptpn11 PE=1 SV=2	-0.0806305	0.582991	0.9992
P35278	RAB5C_MOUSE	Ras-related protein Rab-5C OS=Mus musculus GN=Rab5c PE=1 SV=2	0.117891	0.135689	0.9992
P35279	RAB6A_MOUSE	Ras-related protein Rab-6A OS=Mus musculus GN=Rab6a PE=1 SV=4	-0.010949	0.936227	0.9992
P35585	AP1M1_MOUSE	AP-1 complex subunit mu-1 OS=Mus musculus GN=Ap1m1 PE=1 SV=3	-0.0176296	0.82082	0.9992
P35700	PRDX1_MOUSE	Peroxiredoxin-1 OS=Mus musculus GN=Prdx1 PE=1 SV=1	-0.0272422	0.54626	0.9992
P35980	RL18_MOUSE	60S ribosomal protein L18 OS=Mus musculus GN=Rpl18 PE=1 SV=3	-0.0689762	0.656272	0.9992
P36536	SAR1A_MOUSE	GTP-binding protein SAR1a OS=Mus musculus GN=Sar1a PE=1 SV=1	0.291707	0.381804	0.9992
P36916	GNL1_MOUSE	Guanine nucleotide-binding protein-like 1 OS=Mus musculus GN=Gnl1 PE=1 SV=4	-0.0385856	0.758988	0.9992
P39053	DYN1_MOUSE	Dynamin-1 OS=Mus musculus GN=Dnm1 PE=1 SV=2	-0.0170683	0.643353	0.9992
P40124	CAP1_MOUSE	Adenylyl cyclase-associated protein 1 OS=Mus musculus GN=Cap1 PE=1 SV=4	-0.0518545	0.276798	0.9992
P40142	TKT_MOUSE	Transketolase OS=Mus musculus GN=Tkt PE=1 SV=1	-0.0158971	0.608482	0.9992
P42669	PURA_MOUSE	Transcriptional activator protein Pur-alpha OS=Mus musculus GN=Pura PE=1 SV=1	-0.00147741	0.985369	0.9992
P42932	TCPQ_MOUSE	T-complex protein 1 subunit theta OS=Mus musculus GN=Cct8 PE=1 SV=3	0.0223433	0.698155	0.9992
P45376	ALDR_MOUSE	Aldose reductase OS=Mus musculus GN=Akr1b1 PE=1 SV=3	-0.065265	0.106438	0.9992
P45591	COF2_MOUSE	Cofilin-2 OS=Mus musculus GN=Cfl2 PE=1 SV=1	0.0345664	0.772343	0.9992
P46460	NSF_MOUSE	Vesicle-fusing ATPase OS=Mus musculus GN=Nsf PE=1 SV=2	0.0478494	0.666325	0.9992
P46471	PRS7_MOUSE	26S protease regulatory subunit 7 OS=Mus musculus GN=Psmc2 PE=1 SV=5	0.19734	0.492566	0.9992
P46638	RB11B_MOUSE	Ras-related protein Rab-11B OS=Mus musculus GN=Rab11b PE=1 SV=3	0.0161817	0.730686	0.9992
P46660	AINX_MOUSE	Alpha-internexin OS=Mus musculus GN=Ina PE=1 SV=3	-0.242791	0.0153758	0.9992
P46664	PURA2_MOUSE	Adenylosuccinate synthetase isozyme 2 OS=Mus musculus GN=Adss PE=1 SV=2	0.0558815	0.365319	0.9992
P47754	CAZA2_MOUSE	F-actin-capping protein subunit alpha-2 OS=Mus musculus GN=Capza2 PE=1 SV=3	-0.0815364	0.238205	0.9992
P47757	CAPZB_MOUSE	F-actin-capping protein subunit beta OS=Mus musculus GN=Capzb PE=1 SV=3	-0.0648318	0.450368	0.9992
P47809	MP2K4_MOUSE	Dual specificity mitogen-activated protein kinase kinase 4 OS=Mus musculus GN=Map2k4 PE=1 SV=2	-0.120966	0.520765	0.9992
P47857	PFKAM_MOUSE	ATP-dependent 6-phosphofructokinase, muscle type OS=Mus musculus GN=Pfkm PE=1 SV=3	0.073855	0.307576	0.9992
P47911	RL6_MOUSE	60S ribosomal protein L6 OS=Mus musculus GN=Rpl6 PE=1 SV=3	-0.0742499	0.529535	0.9992
P47955	RLA1_MOUSE	60S acidic ribosomal protein P1 OS=Mus musculus GN=Rplp1 PE=1 SV=1	-0.126963	0.404037	0.9992
P47963	RL13_MOUSE	60S ribosomal protein L13 OS=Mus musculus GN=Rpl13 PE=1 SV=3	0.312683	0.0884236	0.9992
P48036	ANXA5_MOUSE	Annexin A5 OS=Mus musculus GN=Anxa5 PE=1 SV=1	-0.029255	0.611105	0.9992
P48320	DCE2_MOUSE	Glutamate decarboxylase 2 OS=Mus musculus GN=Gad2 PE=1 SV=1	0.232611	0.304963	0.9992
P48453	PP2BB_MOUSE	Serine/threonine-protein phosphatase 2B catalytic subunit beta isoform OS=Mus musculus GN=Ppp3cb PE=1 SV=2	-0.0541402	0.542195	0.9992
P48722	HS74L_MOUSE	Heat shock 70 kDa protein 4L OS=Mus musculus GN=Hspa4l PE=1 SV=2	-0.0241562	0.627774	0.9992
P48758	CBR1_MOUSE	Carbonyl reductase [NADPH] 1 OS=Mus musculus GN=Cbr1 PE=1 SV=3	0.0335494	0.455131	0.9992
P48774	GSTM5_MOUSE	Glutathione S-transferase Mu 5 OS=Mus musculus GN=Gstm5 PE=1 SV=1	0.0276098	0.701182	0.9992
P49442	INPP_MOUSE	Inositol polyphosphate 1-phosphatase OS=Mus musculus GN=Inpp1 PE=1 SV=2	-0.00932701	0.919879	0.9992
P49443	PPM1A_MOUSE	Protein phosphatase 1A OS=Mus musculus GN=Ppm1a PE=1 SV=1	0.0375517	0.709923	0.9992
P49615	CDK5_MOUSE	Cyclin-dependent-like kinase 5 OS=Mus musculus GN=Cdk5 PE=1 SV=1	-0.00234887	0.969356	0.9992
P50114	S100B_MOUSE	Protein S100-B OS=Mus musculus GN=S100b PE=1 SV=2	0.0228014	0.889773	0.9992
P50247	SAHH_MOUSE	Adenosylhomocysteinase OS=Mus musculus GN=Ahcy PE=1 SV=3	0.0869744	0.0354173	0.9992
P50396	GDIA_MOUSE	Rab GDP dissociation inhibitor alpha OS=Mus musculus GN=Gdi1 PE=1 SV=3	0.00617842	0.909818	0.9992
P50516	VATA_MOUSE	V-type proton ATPase catalytic subunit A OS=Mus musculus GN=Atp6v1a PE=1 SV=2	-0.0153085	0.55125	0.9992
P50518	VATE1_MOUSE	V-type proton ATPase subunit E 1 OS=Mus musculus GN=Atp6v1e1 PE=1 SV=2	0.054369	0.356014	0.9992
P51150	RAB7A_MOUSE	Ras-related protein Rab-7a OS=Mus musculus GN=Rab7a PE=1 SV=2	-0.0181803	0.732173	0.9992
P51855	GSHB_MOUSE	Glutathione synthetase OS=Mus musculus GN=Gss PE=1 SV=1	-0.0108615	0.909817	0.9992
P51859	HDGF_MOUSE	Hepatoma-derived growth factor OS=Mus musculus GN=Hdgf PE=1 SV=2	-0.23904	0.239391	0.9992
P52480	KPYM_MOUSE	Pyruvate kinase PKM OS=Mus musculus GN=Pkm PE=1 SV=4	-0.0636653	0.0704083	0.9992
P53810	PIPNA_MOUSE	Phosphatidylinositol transfer protein alpha isoform OS=Mus musculus GN=Pitpna PE=1 SV=2	0.0825509	0.130015	0.9992
P53994	RAB2A_MOUSE	Ras-related protein Rab-2A OS=Mus musculus GN=Rab2a PE=1 SV=1	-0.128927	0.227593	0.9992
P54227	STMN1_MOUSE	Stathmin OS=Mus musculus GN=Stmn1 PE=1 SV=2	-0.00665533	0.877188	0.9992
P54728	RD23B_MOUSE	UV excision repair protein RAD23 homolog B OS=Mus musculus GN=Rad23b PE=1 SV=2	-0.0420341	0.679105	0.9992
P54822	PUR8_MOUSE	Adenylosuccinate lyase OS=Mus musculus GN=Adsl PE=1 SV=2	0.00697831	0.932293	0.9992
P55066	NCAN_MOUSE	Neurocan core protein OS=Mus musculus GN=Ncan PE=1 SV=1	-0.0547971	0.350861	0.9992
P55264	ADK_MOUSE	Adenosine kinase OS=Mus musculus GN=Adk PE=1 SV=2	-0.0729426	0.575078	0.9992
P56376	ACYP1_MOUSE	Acylphosphatase-1 OS=Mus musculus GN=Acyp1 PE=1 SV=2	0.0645448	0.307592	0.9992
P56380	AP4A_MOUSE	Bis(5'-nucleosyl)-tetraphosphatase [asymmetrical] OS=Mus musculus GN=Nudt2 PE=1 SV=3	-0.121357	0.419098	0.9992
P56399	UBP5_MOUSE	Ubiquitin carboxyl-terminal hydrolase 5 OS=Mus musculus GN=Usp5 PE=1 SV=1	-0.0394123	0.520248	0.9992
P56565	S10A1_MOUSE	Protein S100-A1 OS=Mus musculus GN=S100a1 PE=1 SV=2	-0.127642	0.109154	0.9992
P56812	PDCD5_MOUSE	Programmed cell death protein 5 OS=Mus musculus GN=Pdcd5 PE=1 SV=3	0.111339	0.538134	0.9992
P57746	VATD_MOUSE	V-type proton ATPase subunit D OS=Mus musculus GN=Atp6v1d PE=1 SV=1	-0.0243379	0.832701	0.9992
P57776	EF1D_MOUSE	Elongation factor 1-delta OS=Mus musculus GN=Eef1d PE=1 SV=3	-0.0392011	0.674594	0.9992
P57780	ACTN4_MOUSE	Alpha-actinin-4 OS=Mus musculus GN=Actn4 PE=1 SV=1	0.0301147	0.724763	0.9992
P58252	EF2_MOUSE	Elongation factor 2 OS=Mus musculus GN=Eef2 PE=1 SV=2	0.0215637	0.506478	0.9992
P58389	PTPA_MOUSE	Serine/threonine-protein phosphatase 2A activator OS=Mus musculus GN=Ppp2r4 PE=1 SV=1	-0.04343	0.406679	0.9992
P58404	STRN4_MOUSE	Striatin-4 OS=Mus musculus GN=Strn4 PE=1 SV=2	0.0761195	0.543863	0.9992
P58774	TPM2_MOUSE	Tropomyosin beta chain OS=Mus musculus GN=Tpm2 PE=1 SV=1	0.0611588	0.757889	0.9992
P59325	IF5_MOUSE	Eukaryotic translation initiation factor 5 OS=Mus musculus GN=Eif5 PE=1 SV=1	0.0660817	0.262979	0.9992
P59999	ARPC4_MOUSE	Actin-related protein 2/3 complex subunit 4 OS=Mus musculus GN=Arpc4 PE=1 SV=3	-0.0685992	0.263299	0.9992
P60487	PLPP_MOUSE	Pyridoxal phosphate phosphatase OS=Mus musculus GN=Pdxp PE=1 SV=1	0.0101511	0.871851	0.9992
P60761	NEUG_MOUSE	Neurogranin OS=Mus musculus GN=Nrgn PE=1 SV=1	0.200562	0.275809	0.9992
P60766	CDC42_MOUSE	Cell division control protein 42 homolog OS=Mus musculus GN=Cdc42 PE=1 SV=2	-0.0473338	0.616951	0.9992
P60840	ENSA_MOUSE	Alpha-endosulfine OS=Mus musculus GN=Ensa PE=1 SV=1	-0.135335	0.0253291	0.9992
P60843	IF4A1_MOUSE	Eukaryotic initiation factor 4A-I OS=Mus musculus GN=Eif4a1 PE=1 SV=1	0.0814077	0.357513	0.9992
P60879	SNP25_MOUSE	Synaptosomal-associated protein 25 OS=Mus musculus GN=Snap25 PE=1 SV=1	0.135557	0.416394	0.9992
P61027	RAB10_MOUSE	Ras-related protein Rab-10 OS=Mus musculus GN=Rab10 PE=1 SV=1	0.00613669	0.898346	0.9992
P61082	UBC12_MOUSE	NEDD8-conjugating enzyme Ubc12 OS=Mus musculus GN=Ube2m PE=1 SV=1	-0.100168	0.431163	0.9992
P61089	UBE2N_MOUSE	Ubiquitin-conjugating enzyme E2 N OS=Mus musculus GN=Ube2n PE=1 SV=1	-0.0569376	0.186676	0.9992
P61161	ARP2_MOUSE	Actin-related protein 2 OS=Mus musculus GN=Actr2 PE=1 SV=1	-0.135089	0.0885594	0.9992
P61202	CSN2_MOUSE	COP9 signalosome complex subunit 2 OS=Mus musculus GN=Cops2 PE=1 SV=1	0.00411598	0.958839	0.9992
P61205	ARF3_MOUSE	ADP-ribosylation factor 3 OS=Mus musculus GN=Arf3 PE=2 SV=2	0.116806	0.727721	0.9992
P61211	ARL1_MOUSE	ADP-ribosylation factor-like protein 1 OS=Mus musculus GN=Arl1 PE=1 SV=1	0.0766866	0.788933	0.9992
P61294	RAB6B_MOUSE	Ras-related protein Rab-6B OS=Mus musculus GN=Rab6b PE=1 SV=1	0.0566134	0.662562	0.9992
P61750	ARF4_MOUSE	ADP-ribosylation factor 4 OS=Mus musculus GN=Arf4 PE=1 SV=2	0.00591143	0.957043	0.9992
P61759	PFD3_MOUSE	Prefoldin subunit 3 OS=Mus musculus GN=Vbp1 PE=1 SV=2	0.00159576	0.984355	0.9992
P61979	HNRPK_MOUSE	Heterogeneous nuclear ribonucleoprotein K OS=Mus musculus GN=Hnrnpk PE=1 SV=1	-0.077995	0.14185	0.9992
P61982	1433G_MOUSE	14-3-3 protein gamma OS=Mus musculus GN=Ywhag PE=1 SV=2	0.128083	0.0273942	0.9992
P62082	RS7_MOUSE	40S ribosomal protein S7 OS=Mus musculus GN=Rps7 PE=2 SV=1	0.0566805	0.510177	0.9992
P62137	PP1A_MOUSE	Serine/threonine-protein phosphatase PP1-alpha catalytic subunit OS=Mus musculus GN=Ppp1ca PE=1 SV=1	-0.0267962	0.775627	0.9992
P62141	PP1B_MOUSE	Serine/threonine-protein phosphatase PP1-beta catalytic subunit OS=Mus musculus GN=Ppp1cb PE=1 SV=3	-0.0256867	0.715599	0.9992
P62192	PRS4_MOUSE	26S protease regulatory subunit 4 OS=Mus musculus GN=Psmc1 PE=1 SV=1	0.0992017	0.59081	0.9992
P62204	CALM_MOUSE	Calmodulin OS=Mus musculus GN=Calm1 PE=1 SV=2	0.0228231	0.659237	0.9992
P62242	RS8_MOUSE	40S ribosomal protein S8 OS=Mus musculus GN=Rps8 PE=1 SV=2	0.20487	0.276044	0.9992
P62245	RS15A_MOUSE	40S ribosomal protein S15a OS=Mus musculus GN=Rps15a PE=1 SV=2	0.259022	0.0231023	0.9992
P62259	1433E_MOUSE	14-3-3 protein epsilon OS=Mus musculus GN=Ywhae PE=1 SV=1	0.0423457	0.441402	0.9992
P62270	RS18_MOUSE	40S ribosomal protein S18 OS=Mus musculus GN=Rps18 PE=1 SV=3	0.38591	0.176032	0.9992
P62301	RS13_MOUSE	40S ribosomal protein S13 OS=Mus musculus GN=Rps13 PE=1 SV=2	0.112418	0.448043	0.9992
P62315	SMD1_MOUSE	Small nuclear ribonucleoprotein Sm D1 OS=Mus musculus GN=Snrpd1 PE=1 SV=1	-0.20108	0.21808	0.9992
P62320	SMD3_MOUSE	Small nuclear ribonucleoprotein Sm D3 OS=Mus musculus GN=Snrpd3 PE=1 SV=1	-0.308174	0.249178	0.9992
P62334	PRS10_MOUSE	26S protease regulatory subunit 10B OS=Mus musculus GN=Psmc6 PE=1 SV=1	-0.198561	0.461743	0.9992
P62484	ABI2_MOUSE	Abl interactor 2 OS=Mus musculus GN=Abi2 PE=1 SV=1	-0.00802579	0.974382	0.9992
P62631	EF1A2_MOUSE	Elongation factor 1-alpha 2 OS=Mus musculus GN=Eef1a2 PE=1 SV=1	0.0970507	0.1905	0.9992
P62702	RS4X_MOUSE	40S ribosomal protein S4, X isoform OS=Mus musculus GN=Rps4x PE=1 SV=2	0.0125469	0.934508	0.9992
P62743	AP2S1_MOUSE	AP-2 complex subunit sigma OS=Mus musculus GN=Ap2s1 PE=1 SV=1	-0.0866646	0.524703	0.9992
P62748	HPCL1_MOUSE	Hippocalcin-like protein 1 OS=Mus musculus GN=Hpcal1 PE=1 SV=2	0.208261	0.0338927	0.9992
P62761	VISL1_MOUSE	Visinin-like protein 1 OS=Mus musculus GN=Vsnl1 PE=1 SV=2	-0.116496	0.0289624	0.9992
P62774	MTPN_MOUSE	Myotrophin OS=Mus musculus GN=Mtpn PE=1 SV=2	0.0011113	0.989984	0.9992
P62814	VATB2_MOUSE	V-type proton ATPase subunit B, brain isoform OS=Mus musculus GN=Atp6v1b2 PE=1 SV=1	0.0391936	0.396004	0.9992
P62821	RAB1A_MOUSE	Ras-related protein Rab-1A OS=Mus musculus GN=Rab1A PE=1 SV=3	0.0776889	0.385738	0.9992
P62823	RAB3C_MOUSE	Ras-related protein Rab-3C OS=Mus musculus GN=Rab3c PE=1 SV=1	-0.122392	0.383281	0.9992
P62827	RAN_MOUSE	GTP-binding nuclear protein Ran OS=Mus musculus GN=Ran PE=1 SV=3	0.0169935	0.522126	0.9992
P62830	RL23_MOUSE	60S ribosomal protein L23 OS=Mus musculus GN=Rpl23 PE=1 SV=1	0.0917766	0.405473	0.9992
P62849	RS24_MOUSE	40S ribosomal protein S24 OS=Mus musculus GN=Rps24 PE=1 SV=1	-0.0583016	0.595682	0.9992
P62855	RS26_MOUSE	40S ribosomal protein S26 OS=Mus musculus GN=Rps26 PE=1 SV=3	0.235457	0.166058	0.9992
P62858	RS28_MOUSE	40S ribosomal protein S28 OS=Mus musculus GN=Rps28 PE=1 SV=1	0.210814	0.440135	0.9992
P62869	ELOB_MOUSE	Transcription elongation factor B polypeptide 2 OS=Mus musculus GN=Tceb2 PE=1 SV=1	0.00378195	0.971445	0.9992
P62900	RL31_MOUSE	60S ribosomal protein L31 OS=Mus musculus GN=Rpl31 PE=1 SV=1	-0.00769689	0.940512	0.9992
P62908	RS3_MOUSE	40S ribosomal protein S3 OS=Mus musculus GN=Rps3 PE=1 SV=1	-0.0192706	0.850813	0.9992
P62962	PROF1_MOUSE	Profilin-1 OS=Mus musculus GN=Pfn1 PE=1 SV=2	0.0144226	0.694475	0.9992
P62983	RS27A_MOUSE	Ubiquitin-40S ribosomal protein S27a OS=Mus musculus GN=Rps27a PE=1 SV=2	0.018186	0.748174	0.9992
P63001	RAC1_MOUSE	Ras-related C3 botulinum toxin substrate 1 OS=Mus musculus GN=Rac1 PE=1 SV=1	-0.109624	0.274422	0.9992
P63005	LIS1_MOUSE	Platelet-activating factor acetylhydrolase IB subunit alpha OS=Mus musculus GN=Pafah1b1 PE=1 SV=2	-0.12332	0.203396	0.9992
P63011	RAB3A_MOUSE	Ras-related protein Rab-3A OS=Mus musculus GN=Rab3a PE=1 SV=1	-0.00231539	0.936601	0.9992
P63017	HSP7C_MOUSE	Heat shock cognate 71 kDa protein OS=Mus musculus GN=Hspa8 PE=1 SV=1	-0.0568607	0.460055	0.9992
P63028	TCTP_MOUSE	Translationally-controlled tumor protein OS=Mus musculus GN=Tpt1 PE=1 SV=1	0.0135561	0.8744	0.9992
P63037	DNJA1_MOUSE	DnaJ homolog subfamily A member 1 OS=Mus musculus GN=Dnaja1 PE=1 SV=1	-0.0502901	0.349035	0.9992
P63038	CH60_MOUSE	60 kDa heat shock protein, mitochondrial OS=Mus musculus GN=Hspd1 PE=1 SV=1	-0.0209676	0.943532	0.9992
P63040	CPLX1_MOUSE	Complexin-1 OS=Mus musculus GN=Cplx1 PE=1 SV=1	-0.0973355	0.398602	0.9992
P63046	ST4A1_MOUSE	Sulfotransferase 4A1 OS=Mus musculus GN=Sult4a1 PE=1 SV=1	0.0808773	0.356673	0.9992
P63054	PCP4_MOUSE	Purkinje cell protein 4 OS=Mus musculus GN=Pcp4 PE=3 SV=2	0.0901633	0.136273	0.9992
P63085	MK01_MOUSE	Mitogen-activated protein kinase 1 OS=Mus musculus GN=Mapk1 PE=1 SV=3	0.00141352	0.98252	0.9992
P63101	1433Z_MOUSE	14-3-3 protein zeta/delta OS=Mus musculus GN=Ywhaz PE=1 SV=1	-0.0246908	0.663674	0.9992
P63158	HMGB1_MOUSE	High mobility group protein B1 OS=Mus musculus GN=Hmgb1 PE=1 SV=2	-0.00423998	0.97533	0.9992
P63242	IF5A1_MOUSE	Eukaryotic translation initiation factor 5A-1 OS=Mus musculus GN=Eif5a PE=1 SV=2	-0.0166275	0.72228	0.9992
P63276	RS17_MOUSE	40S ribosomal protein S17 OS=Mus musculus GN=Rps17 PE=1 SV=2	0.0399936	0.775837	0.9992
P63280	UBC9_MOUSE	SUMO-conjugating enzyme UBC9 OS=Mus musculus GN=Ube2i PE=1 SV=1	-0.290884	0.445741	0.9992
P63318	KPCG_MOUSE	Protein kinase C gamma type OS=Mus musculus GN=Prkcg PE=1 SV=1	0.0246751	0.661686	0.9992
P63325	RS10_MOUSE	40S ribosomal protein S10 OS=Mus musculus GN=Rps10 PE=1 SV=1	-0.03346	0.739463	0.9992
P63328	PP2BA_MOUSE	Serine/threonine-protein phosphatase 2B catalytic subunit alpha isoform OS=Mus musculus GN=Ppp3ca PE=1 SV=1	-0.0964022	0.144143	0.9992
P63330	PP2AA_MOUSE	Serine/threonine-protein phosphatase 2A catalytic subunit alpha isoform OS=Mus musculus GN=Ppp2ca PE=1 SV=1	-0.0431042	0.454845	0.9992
P68033	ACTC_MOUSE	Actin, alpha cardiac muscle 1 OS=Mus musculus GN=Actc1 PE=1 SV=1	-0.0904341	0.471268	0.9992
P68037	UB2L3_MOUSE	Ubiquitin-conjugating enzyme E2 L3 OS=Mus musculus GN=Ube2l3 PE=1 SV=1	0.0653731	0.615977	0.9992
P68040	RACK1_MOUSE	Receptor of activated protein C kinase 1 OS=Mus musculus GN=Rack1 PE=1 SV=3	-0.0167551	0.878336	0.9992
P68181	KAPCB_MOUSE	cAMP-dependent protein kinase catalytic subunit beta OS=Mus musculus GN=Prkacb PE=1 SV=2	0.221978	0.129017	0.9992
P68254	1433T_MOUSE	14-3-3 protein theta OS=Mus musculus GN=Ywhaq PE=1 SV=1	0.0425199	0.686922	0.9992
P68368	TBA4A_MOUSE	Tubulin alpha-4A chain OS=Mus musculus GN=Tuba4a PE=1 SV=1	-0.0091539	0.928078	0.9992
P68369	TBA1A_MOUSE	Tubulin alpha-1A chain OS=Mus musculus GN=Tuba1a PE=1 SV=1	0.040546	0.466666	0.9992
P68372	TBB4B_MOUSE	Tubulin beta-4B chain OS=Mus musculus GN=Tubb4b PE=1 SV=1	-0.0700579	0.301144	0.9992
P68373	TBA1C_MOUSE	Tubulin alpha-1C chain OS=Mus musculus GN=Tuba1c PE=1 SV=1	0.072164	0.704632	0.9992
P68404	KPCB_MOUSE	Protein kinase C beta type OS=Mus musculus GN=Prkcb PE=1 SV=4	-0.013478	0.749739	0.9992
P68510	1433F_MOUSE	14-3-3 protein eta OS=Mus musculus GN=Ywhah PE=1 SV=2	-0.0194866	0.721138	0.9992
P70168	IMB1_MOUSE	Importin subunit beta-1 OS=Mus musculus GN=Kpnb1 PE=1 SV=2	0.00852446	0.909493	0.9992
P70296	PEBP1_MOUSE	Phosphatidylethanolamine-binding protein 1 OS=Mus musculus GN=Pebp1 PE=1 SV=3	-0.00445319	0.893003	0.9992
P70297	STAM1_MOUSE	Signal transducing adapter molecule 1 OS=Mus musculus GN=Stam PE=1 SV=3	-0.0261551	0.902252	0.9992
P70336	ROCK2_MOUSE	Rho-associated protein kinase 2 OS=Mus musculus GN=Rock2 PE=1 SV=1	0.0644978	0.371911	0.9992
P70349	HINT1_MOUSE	Histidine triad nucleotide-binding protein 1 OS=Mus musculus GN=Hint1 PE=1 SV=3	0.00214548	0.953982	0.9992
P70398	USP9X_MOUSE	Probable ubiquitin carboxyl-terminal hydrolase FAF-X OS=Mus musculus GN=Usp9x PE=1 SV=2	0.016243	0.85605	0.9992
P70663	SPRL1_MOUSE	SPARC-like protein 1 OS=Mus musculus GN=Sparcl1 PE=1 SV=3	0.202737	0.0590894	0.9992
P70670	NACAM_MOUSE	Nascent polypeptide-associated complex subunit alpha, muscle-specific form OS=Mus musculus GN=Naca PE=1 SV=2	0.0104865	0.713121	0.9992
P80313	TCPH_MOUSE	T-complex protein 1 subunit eta OS=Mus musculus GN=Cct7 PE=1 SV=1	0.112422	0.196131	0.9992
P80314	TCPB_MOUSE	T-complex protein 1 subunit beta OS=Mus musculus GN=Cct2 PE=1 SV=4	-0.0255112	0.730657	0.9992
P80315	TCPD_MOUSE	T-complex protein 1 subunit delta OS=Mus musculus GN=Cct4 PE=1 SV=3	0.0056622	0.938698	0.9992
P80316	TCPE_MOUSE	T-complex protein 1 subunit epsilon OS=Mus musculus GN=Cct5 PE=1 SV=1	0.0921396	0.139218	0.9992
P80317	TCPZ_MOUSE	T-complex protein 1 subunit zeta OS=Mus musculus GN=Cct6a PE=1 SV=3	0.0208877	0.714027	0.9992
P80318	TCPG_MOUSE	T-complex protein 1 subunit gamma OS=Mus musculus GN=Cct3 PE=1 SV=1	-0.00558788	0.9293	0.9992
P84075	HPCA_MOUSE	Neuron-specific calcium-binding protein hippocalcin OS=Mus musculus GN=Hpca PE=1 SV=2	-0.0126144	0.903562	0.9992
P84084	ARF5_MOUSE	ADP-ribosylation factor 5 OS=Mus musculus GN=Arf5 PE=1 SV=2	0.117928	0.464295	0.9992
P84086	CPLX2_MOUSE	Complexin-2 OS=Mus musculus GN=Cplx2 PE=1 SV=1	0.19873	0.326018	0.9992
P84091	AP2M1_MOUSE	AP-2 complex subunit mu OS=Mus musculus GN=Ap2m1 PE=1 SV=1	-0.0771884	0.229783	0.9992
P97371	PSME1_MOUSE	Proteasome activator complex subunit 1 OS=Mus musculus GN=Psme1 PE=1 SV=2	0.0515763	0.609316	0.9992
P97427	DPYL1_MOUSE	Dihydropyrimidinase-related protein 1 OS=Mus musculus GN=Crmp1 PE=1 SV=1	-0.0447656	0.3372	0.9992
P97461	RS5_MOUSE	40S ribosomal protein S5 OS=Mus musculus GN=Rps5 PE=1 SV=3	-0.0163662	0.866637	0.9992
P97807	FUMH_MOUSE	Fumarate hydratase, mitochondrial OS=Mus musculus GN=Fh PE=1 SV=3	0.0537573	0.718136	0.9992
P97822	AN32E_MOUSE	Acidic leucine-rich nuclear phosphoprotein 32 family member E OS=Mus musculus GN=Anp32e PE=1 SV=2	-0.0168782	0.915591	0.9992
P99024	TBB5_MOUSE	Tubulin beta-5 chain OS=Mus musculus GN=Tubb5 PE=1 SV=1	-0.0340529	0.7056	0.9992
P99027	RLA2_MOUSE	60S acidic ribosomal protein P2 OS=Mus musculus GN=Rplp2 PE=1 SV=3	-0.0873865	0.541117	0.9992
P99029	PRDX5_MOUSE	Peroxiredoxin-5, mitochondrial OS=Mus musculus GN=Prdx5 PE=1 SV=2	-0.0581093	0.236237	0.9992
Q00612	G6PD1_MOUSE	Glucose-6-phosphate 1-dehydrogenase X OS=Mus musculus GN=G6pdx PE=1 SV=3	0.111035	0.283531	0.9992
Q00623	APOA1_MOUSE	Apolipoprotein A-I OS=Mus musculus GN=Apoa1 PE=1 SV=2	-0.0337831	0.803289	0.9992
Q00915	RET1_MOUSE	Retinol-binding protein 1 OS=Mus musculus GN=Rbp1 PE=1 SV=2	0.0989609	0.201766	0.9992
Q01065	PDE1B_MOUSE	Calcium/calmodulin-dependent 3',5'-cyclic nucleotide phosphodiesterase 1B OS=Mus musculus GN=Pde1b PE=1 SV=2	-0.0291163	0.547582	0.9992
Q01768	NDKB_MOUSE	Nucleoside diphosphate kinase B OS=Mus musculus GN=Nme2 PE=1 SV=1	0.0450018	0.457724	0.9992
Q01853	TERA_MOUSE	Transitional endoplasmic reticulum ATPase OS=Mus musculus GN=Vcp PE=1 SV=4	0.0233761	0.437	0.9992
Q02053	UBA1_MOUSE	Ubiquitin-like modifier-activating enzyme 1 OS=Mus musculus GN=Uba1 PE=1 SV=1	0.0213861	0.431333	0.9992
Q03157	APLP1_MOUSE	Amyloid-like protein 1 OS=Mus musculus GN=Aplp1 PE=1 SV=1	-0.122584	0.170158	0.9992
Q03958	PFD6_MOUSE	Prefoldin subunit 6 OS=Mus musculus GN=Pfdn6 PE=1 SV=1	0.311298	0.154498	0.9992
Q04447	KCRB_MOUSE	Creatine kinase B-type OS=Mus musculus GN=Ckb PE=1 SV=1	-0.0304113	0.421241	0.9992
Q05816	FABP5_MOUSE	Fatty acid-binding protein, epidermal OS=Mus musculus GN=Fabp5 PE=1 SV=3	0.0171666	0.779726	0.9992
Q06138	CAB39_MOUSE	Calcium-binding protein 39 OS=Mus musculus GN=Cab39 PE=1 SV=2	0.0139562	0.955528	0.9992
Q06890	CLUS_MOUSE	Clusterin OS=Mus musculus GN=Clu PE=1 SV=1	0.00529514	0.962067	0.9992
Q07076	ANXA7_MOUSE	Annexin A7 OS=Mus musculus GN=Anxa7 PE=1 SV=2	0.00468602	0.925626	0.9992
Q08331	CALB2_MOUSE	Calretinin OS=Mus musculus GN=Calb2 PE=1 SV=3	0.10234	0.330494	0.9992
Q11011	PSA_MOUSE	Puromycin-sensitive aminopeptidase OS=Mus musculus GN=Npepps PE=1 SV=2	0.024297	0.34341	0.9992
Q11136	PEPD_MOUSE	Xaa-Pro dipeptidase OS=Mus musculus GN=Pepd PE=1 SV=3	0.064872	0.649549	0.9992
Q148V7	K1468_MOUSE	LisH domain and HEAT repeat-containing protein KIAA1468 OS=Mus musculus GN=Kiaa1468 PE=1 SV=1	0.226028	0.403408	0.9992
Q2NL51	GSK3A_MOUSE	Glycogen synthase kinase-3 alpha OS=Mus musculus GN=Gsk3a PE=1 SV=2	-0.0926429	0.722882	0.9992
Q3TCH7	CUL4A_MOUSE	Cullin-4A OS=Mus musculus GN=Cul4a PE=1 SV=1	0.0176968	0.885368	0.9992
Q3THE2	ML12B_MOUSE	Myosin regulatory light chain 12B OS=Mus musculus GN=Myl12b PE=1 SV=2	-0.0649984	0.460073	0.9992
Q3THK7	GUAA_MOUSE	GMP synthase [glutamine-hydrolyzing] OS=Mus musculus GN=Gmps PE=1 SV=2	-0.144581	0.416283	0.9992
Q3THS6	METK2_MOUSE	S-adenosylmethionine synthase isoform type-2 OS=Mus musculus GN=Mat2a PE=1 SV=2	-0.00401587	0.917326	0.9992
Q3TMH2	SCRN3_MOUSE	Secernin-3 OS=Mus musculus GN=Scrn3 PE=1 SV=1	0.162937	0.0565613	0.9992
Q3TW96	UAP1L_MOUSE	UDP-N-acetylhexosamine pyrophosphorylase-like protein 1 OS=Mus musculus GN=Uap1l1 PE=1 SV=1	0.124305	0.619922	0.9992
Q3U1J4	DDB1_MOUSE	DNA damage-binding protein 1 OS=Mus musculus GN=Ddb1 PE=1 SV=2	0.0430269	0.431806	0.9992
Q3UGR5	HDHD2_MOUSE	Haloacid dehalogenase-like hydrolase domain-containing protein 2 OS=Mus musculus GN=Hdhd2 PE=1 SV=2	0.0330547	0.800294	0.9992
Q3UHJ0	AAK1_MOUSE	AP2-associated protein kinase 1 OS=Mus musculus GN=Aak1 PE=1 SV=2	0.0847517	0.176248	0.9992
Q3UHL1	CAMKV_MOUSE	CaM kinase-like vesicle-associated protein OS=Mus musculus GN=Camkv PE=1 SV=2	-0.0702038	0.6435	0.9992
Q3ULJ0	GPD1L_MOUSE	Glycerol-3-phosphate dehydrogenase 1-like protein OS=Mus musculus GN=Gpd1l PE=1 SV=2	-0.0175071	0.8044	0.9992
Q3UM45	PP1R7_MOUSE	Protein phosphatase 1 regulatory subunit 7 OS=Mus musculus GN=Ppp1r7 PE=1 SV=2	-0.0193255	0.667076	0.9992
Q3UPL0	SC31A_MOUSE	Protein transport protein Sec31A OS=Mus musculus GN=Sec31a PE=1 SV=2	-0.010225	0.885121	0.9992
Q3UX10	TBAL3_MOUSE	Tubulin alpha chain-like 3 OS=Mus musculus GN=Tubal3 PE=2 SV=2	-0.032496	0.514308	0.9992
Q3V0Q1	DYH12_MOUSE	Dynein heavy chain 12, axonemal OS=Mus musculus GN=Dnah12 PE=1 SV=2	-0.145826	0.0203434	0.9992
Q4KMM3	OXR1_MOUSE	Oxidation resistance protein 1 OS=Mus musculus GN=Oxr1 PE=1 SV=3	-0.0852247	0.374274	0.9992
Q58A65	JIP4_MOUSE	C-Jun-amino-terminal kinase-interacting protein 4 OS=Mus musculus GN=Spag9 PE=1 SV=2	0.0557934	0.848169	0.9992
Q5FWK3	RHG01_MOUSE	Rho GTPase-activating protein 1 OS=Mus musculus GN=Arhgap1 PE=1 SV=1	0.166254	0.476568	0.9992
Q5M8N0	CNRP1_MOUSE	CB1 cannabinoid receptor-interacting protein 1 OS=Mus musculus GN=Cnrip1 PE=1 SV=1	-0.0389237	0.664308	0.9992
Q5PR73	DIRA2_MOUSE	GTP-binding protein Di-Ras2 OS=Mus musculus GN=Diras2 PE=1 SV=1	-0.0708314	0.418034	0.9992
Q5SQX6	CYFP2_MOUSE	Cytoplasmic FMR1-interacting protein 2 OS=Mus musculus GN=Cyfip2 PE=1 SV=2	-0.0171125	0.755578	0.9992
Q5SRX1	TM1L2_MOUSE	TOM1-like protein 2 OS=Mus musculus GN=Tom1l2 PE=1 SV=1	0.0236687	0.715928	0.9992
Q5SSL4	ABR_MOUSE	Active breakpoint cluster region-related protein OS=Mus musculus GN=Abr PE=1 SV=1	0.0385864	0.584463	0.9992
Q5XJY5	COPD_MOUSE	Coatomer subunit delta OS=Mus musculus GN=Arcn1 PE=1 SV=2	0.0933353	0.425798	0.9992
Q60598	SRC8_MOUSE	Src substrate cortactin OS=Mus musculus GN=Cttn PE=1 SV=2	-0.0909078	0.297508	0.9992
Q60605	MYL6_MOUSE	Myosin light polypeptide 6 OS=Mus musculus GN=Myl6 PE=1 SV=3	-0.0680721	0.138061	0.9992
Q60631	GRB2_MOUSE	Growth factor receptor-bound protein 2 OS=Mus musculus GN=Grb2 PE=1 SV=1	-0.016069	0.88497	0.9992
Q60676	PPP5_MOUSE	Serine/threonine-protein phosphatase 5 OS=Mus musculus GN=Ppp5c PE=1 SV=3	-0.20625	0.214996	0.9992
Q60737	CSK21_MOUSE	Casein kinase II subunit alpha OS=Mus musculus GN=Csnk2a1 PE=1 SV=2	0.0378256	0.576901	0.9992
Q60829	PPR1B_MOUSE	Protein phosphatase 1 regulatory subunit 1B OS=Mus musculus GN=Ppp1r1b PE=1 SV=2	-0.0388256	0.729242	0.9992
Q60864	STIP1_MOUSE	Stress-induced-phosphoprotein 1 OS=Mus musculus GN=Stip1 PE=1 SV=1	0.020413	0.647502	0.9992
Q60996	2A5G_MOUSE	Serine/threonine-protein phosphatase 2A 56 kDa regulatory subunit gamma isoform OS=Mus musculus GN=Ppp2r5c PE=1 SV=2	0.0142679	0.877357	0.9992
Q61024	ASNS_MOUSE	Asparagine synthetase [glutamine-hydrolyzing] OS=Mus musculus GN=Asns PE=1 SV=3	0.151338	0.0542383	0.9992
Q61035	SYHC_MOUSE	Histidine--tRNA ligase, cytoplasmic OS=Mus musculus GN=Hars PE=1 SV=2	-0.0557123	0.437975	0.9992
Q61081	CDC37_MOUSE	Hsp90 co-chaperone Cdc37 OS=Mus musculus GN=Cdc37 PE=1 SV=1	-0.0806578	0.456179	0.9992
Q61166	MARE1_MOUSE	Microtubule-associated protein RP/EB family member 1 OS=Mus musculus GN=Mapre1 PE=1 SV=3	0.0561793	0.660161	0.9992
Q61171	PRDX2_MOUSE	Peroxiredoxin-2 OS=Mus musculus GN=Prdx2 PE=1 SV=3	-0.000851894	0.97243	0.9992
Q61206	PA1B2_MOUSE	Platelet-activating factor acetylhydrolase IB subunit beta OS=Mus musculus GN=Pafah1b2 PE=1 SV=2	0.101552	0.151726	0.9992
Q61316	HSP74_MOUSE	Heat shock 70 kDa protein 4 OS=Mus musculus GN=Hspa4 PE=1 SV=1	0.045651	0.382472	0.9992
Q61361	PGCB_MOUSE	Brevican core protein OS=Mus musculus GN=Bcan PE=1 SV=2	0.0286577	0.675579	0.9992
Q61481	PDE1A_MOUSE	Calcium/calmodulin-dependent 3',5'-cyclic nucleotide phosphodiesterase 1A OS=Mus musculus GN=Pde1a PE=1 SV=2	-0.0136662	0.880909	0.9992
Q61548	AP180_MOUSE	Clathrin coat assembly protein AP180 OS=Mus musculus GN=Snap91 PE=1 SV=1	-0.038304	0.522727	0.9992
Q61553	FSCN1_MOUSE	Fascin OS=Mus musculus GN=Fscn1 PE=1 SV=4	-0.0037637	0.87946	0.9992
Q61598	GDIB_MOUSE	Rab GDP dissociation inhibitor beta OS=Mus musculus GN=Gdi2 PE=1 SV=1	0.0380728	0.421585	0.9992
Q61644	PACN1_MOUSE	Protein kinase C and casein kinase substrate in neurons protein 1 OS=Mus musculus GN=Pacsin1 PE=1 SV=1	-0.0322812	0.170759	0.9992
Q61699	HS105_MOUSE	Heat shock protein 105 kDa OS=Mus musculus GN=Hsph1 PE=1 SV=2	0.0376365	0.441525	0.9992
Q61753	SERA_MOUSE	D-3-phosphoglycerate dehydrogenase OS=Mus musculus GN=Phgdh PE=1 SV=3	0.00686992	0.916566	0.9992
Q61792	LASP1_MOUSE	LIM and SH3 domain protein 1 OS=Mus musculus GN=Lasp1 PE=1 SV=1	-0.0182688	0.807992	0.9992
Q61838	PZP_MOUSE	Pregnancy zone protein OS=Mus musculus GN=Pzp PE=1 SV=3	0.100469	0.489688	0.9992
Q61937	NPM_MOUSE	Nucleophosmin OS=Mus musculus GN=Npm1 PE=1 SV=1	-0.0501289	0.416425	0.9992
Q62048	PEA15_MOUSE	Astrocytic phosphoprotein PEA-15 OS=Mus musculus GN=Pea15 PE=1 SV=1	0.00853994	0.886672	0.9992
Q62059	CSPG2_MOUSE	Versican core protein OS=Mus musculus GN=Vcan PE=1 SV=2	-0.0726343	0.348796	0.9992
Q62093	SRSF2_MOUSE	Serine/arginine-rich splicing factor 2 OS=Mus musculus GN=Srsf2 PE=1 SV=4	-0.000867774	0.99112	0.9992
Q62167	DDX3X_MOUSE	ATP-dependent RNA helicase DDX3X OS=Mus musculus GN=Ddx3x PE=1 SV=3	-0.0881894	0.655842	0.9992
Q62188	DPYL3_MOUSE	Dihydropyrimidinase-related protein 3 OS=Mus musculus GN=Dpysl3 PE=1 SV=1	-0.0120569	0.752648	0.9992
Q62261	SPTB2_MOUSE	Spectrin beta chain, non-erythrocytic 1 OS=Mus musculus GN=Sptbn1 PE=1 SV=2	-0.013019	0.82381	0.9992
Q62318	TIF1B_MOUSE	Transcription intermediary factor 1-beta OS=Mus musculus GN=Trim28 PE=1 SV=3	0.0689289	0.437645	0.9992
Q62348	TSN_MOUSE	Translin OS=Mus musculus GN=Tsn PE=1 SV=1	0.0405179	0.720342	0.9992
Q62418	DBNL_MOUSE	Drebrin-like protein OS=Mus musculus GN=Dbnl PE=1 SV=2	-0.0683542	0.516489	0.9992
Q62420	SH3G2_MOUSE	Endophilin-A1 OS=Mus musculus GN=Sh3gl2 PE=1 SV=2	-0.090727	0.0915181	0.9992
Q62426	CYTB_MOUSE	Cystatin-B OS=Mus musculus GN=Cstb PE=1 SV=1	-0.00195134	0.987862	0.9992
Q63810	CANB1_MOUSE	Calcineurin subunit B type 1 OS=Mus musculus GN=Ppp3r1 PE=1 SV=3	-0.189534	0.102154	0.9992
Q63836	SBP2_MOUSE	Selenium-binding protein 2 OS=Mus musculus GN=Selenbp2 PE=1 SV=2	-0.105682	0.313307	0.9992
Q63844	MK03_MOUSE	Mitogen-activated protein kinase 3 OS=Mus musculus GN=Mapk3 PE=1 SV=5	0.0404397	0.806023	0.9992
Q64010	CRK_MOUSE	Adapter molecule crk OS=Mus musculus GN=Crk PE=1 SV=1	0.060312	0.398543	0.9992
Q64105	SPRE_MOUSE	Sepiapterin reductase OS=Mus musculus GN=Spr PE=1 SV=1	-0.03664	0.630532	0.9992
Q64332	SYN2_MOUSE	Synapsin-2 OS=Mus musculus GN=Syn2 PE=1 SV=2	-0.0440025	0.605056	0.9992
Q64442	DHSO_MOUSE	Sorbitol dehydrogenase OS=Mus musculus GN=Sord PE=1 SV=3	0.0318567	0.635695	0.9992
Q64674	SPEE_MOUSE	Spermidine synthase OS=Mus musculus GN=Srm PE=1 SV=1	0.0328423	0.509843	0.9992
Q64727	VINC_MOUSE	Vinculin OS=Mus musculus GN=Vcl PE=1 SV=4	-0.0528004	0.66809	0.9992
Q68FD5	CLH1_MOUSE	Clathrin heavy chain 1 OS=Mus musculus GN=Cltc PE=1 SV=3	0.0290168	0.279349	0.9992
Q68FH4	GALK2_MOUSE	N-acetylgalactosamine kinase OS=Mus musculus GN=Galk2 PE=1 SV=1	0.0882686	0.465242	0.9992
Q69ZR2	HECD1_MOUSE	E3 ubiquitin-protein ligase HECTD1 OS=Mus musculus GN=Hectd1 PE=1 SV=2	0.0502638	0.876255	0.9992
Q6IRU5	CLCB_MOUSE	Clathrin light chain B OS=Mus musculus GN=Cltb PE=1 SV=1	0.0878532	0.205858	0.9992
Q6P1B1	XPP1_MOUSE	Xaa-Pro aminopeptidase 1 OS=Mus musculus GN=Xpnpep1 PE=1 SV=1	0.175917	0.075091	0.9992
Q6P1F6	2ABA_MOUSE	Serine/threonine-protein phosphatase 2A 55 kDa regulatory subunit B alpha isoform OS=Mus musculus GN=Ppp2r2a PE=1 SV=1	-0.0595035	0.356143	0.9992
Q6P4S6	SIK3_MOUSE	Serine/threonine-protein kinase SIK3 OS=Mus musculus GN=Sik3 PE=1 SV=3	0.17491	0.489628	0.9992
Q6P5F9	XPO1_MOUSE	Exportin-1 OS=Mus musculus GN=Xpo1 PE=1 SV=1	-0.0829984	0.399487	0.9992
Q6PDM2	SRSF1_MOUSE	Serine/arginine-rich splicing factor 1 OS=Mus musculus GN=Srsf1 PE=1 SV=3	-0.0948519	0.184795	0.9992
Q6PER3	MARE3_MOUSE	Microtubule-associated protein RP/EB family member 3 OS=Mus musculus GN=Mapre3 PE=1 SV=1	-0.0145659	0.800307	0.9992
Q6PHZ2	KCC2D_MOUSE	Calcium/calmodulin-dependent protein kinase type II subunit delta OS=Mus musculus GN=Camk2d PE=1 SV=1	0.0500308	0.625362	0.9992
Q6R891	NEB2_MOUSE	Neurabin-2 OS=Mus musculus GN=Ppp1r9b PE=1 SV=1	-0.0273249	0.768631	0.9992
Q6W8Q3	PC4L1_MOUSE	Purkinje cell protein 4-like protein 1 OS=Mus musculus GN=Pcp4l1 PE=1 SV=1	0.0236654	0.91484	0.9992
Q6ZPJ3	UBE2O_MOUSE	(E3-independent) E2 ubiquitin-conjugating enzyme UBE2O OS=Mus musculus GN=Ube2o PE=1 SV=3	0.0743267	0.150542	0.9992
Q6ZQ38	CAND1_MOUSE	Cullin-associated NEDD8-dissociated protein 1 OS=Mus musculus GN=Cand1 PE=1 SV=2	0.0374844	0.368566	0.9992
Q6ZWN5	RS9_MOUSE	40S ribosomal protein S9 OS=Mus musculus GN=Rps9 PE=1 SV=3	-0.34506	0.451628	0.9992
Q71LX4	TLN2_MOUSE	Talin-2 OS=Mus musculus GN=Tln2 PE=1 SV=3	-0.262474	0.172356	0.9992
Q76MZ3	2AAA_MOUSE	Serine/threonine-protein phosphatase 2A 65 kDa regulatory subunit A alpha isoform OS=Mus musculus GN=Ppp2r1a PE=1 SV=3	0.00854126	0.718577	0.9992
Q78YZ6	SCOC_MOUSE	Short coiled-coil protein OS=Mus musculus GN=Scoc PE=1 SV=1	0.119053	0.319199	0.9992
Q78ZA7	NP1L4_MOUSE	Nucleosome assembly protein 1-like 4 OS=Mus musculus GN=Nap1l4 PE=1 SV=1	-0.0725662	0.726033	0.9992
Q7TMM9	TBB2A_MOUSE	Tubulin beta-2A chain OS=Mus musculus GN=Tubb2a PE=1 SV=1	-0.051236	0.445883	0.9992
Q7TMY8	HUWE1_MOUSE	E3 ubiquitin-protein ligase HUWE1 OS=Mus musculus GN=Huwe1 PE=1 SV=5	-0.0705048	0.280785	0.9992
Q7TPR4	ACTN1_MOUSE	Alpha-actinin-1 OS=Mus musculus GN=Actn1 PE=1 SV=1	-0.114561	0.177464	0.9992
Q7TQD2	TPPP_MOUSE	Tubulin polymerization-promoting protein OS=Mus musculus GN=Tppp PE=1 SV=1	-0.131898	0.0669026	0.9992
Q7TQF7	AMPH_MOUSE	Amphiphysin OS=Mus musculus GN=Amph PE=1 SV=1	-0.0771359	0.603458	0.9992
Q7TQI3	OTUB1_MOUSE	Ubiquitin thioesterase OTUB1 OS=Mus musculus GN=Otub1 PE=1 SV=2	-0.0134618	0.812179	0.9992
Q80TB8	VAT1L_MOUSE	Synaptic vesicle membrane protein VAT-1 homolog-like OS=Mus musculus GN=Vat1l PE=1 SV=2	0.108783	0.281514	0.9992
Q80TJ1	CAPS1_MOUSE	Calcium-dependent secretion activator 1 OS=Mus musculus GN=Cadps PE=1 SV=3	-0.0177287	0.75016	0.9992
Q80TL0	PPM1E_MOUSE	Protein phosphatase 1E OS=Mus musculus GN=Ppm1e PE=1 SV=2	0.0862849	0.193947	0.9992
Q80TM9	NISCH_MOUSE	Nischarin OS=Mus musculus GN=Nisch PE=1 SV=2	-0.00790272	0.920925	0.9992
Q80U28	MADD_MOUSE	MAP kinase-activating death domain protein OS=Mus musculus GN=Madd PE=1 SV=2	-0.119584	0.274417	0.9992
Q80UM3	NAA15_MOUSE	N-alpha-acetyltransferase 15, NatA auxiliary subunit OS=Mus musculus GN=Naa15 PE=1 SV=1	0.0751306	0.479986	0.9992
Q80UW2	FBX2_MOUSE	F-box only protein 2 OS=Mus musculus GN=Fbxo2 PE=1 SV=1	-0.175028	0.0774483	0.9992
Q80VP1	EPN1_MOUSE	Epsin-1 OS=Mus musculus GN=Epn1 PE=1 SV=3	-0.00245552	0.988014	0.9992
Q80WM4	HPLN4_MOUSE	Hyaluronan and proteoglycan link protein 4 OS=Mus musculus GN=Hapln4 PE=2 SV=2	0.0839128	0.602786	0.9992
Q80XI4	PI42B_MOUSE	Phosphatidylinositol 5-phosphate 4-kinase type-2 beta OS=Mus musculus GN=Pip4k2b PE=1 SV=1	-0.10779	0.618095	0.9992
Q810U4	NRCAM_MOUSE	Neuronal cell adhesion molecule OS=Mus musculus GN=Nrcam PE=1 SV=2	-0.0156973	0.911674	0.9992
Q8BFY6	PEF1_MOUSE	Peflin OS=Mus musculus GN=Pef1 PE=1 SV=1	-0.0149946	0.75444	0.9992
Q8BFZ3	ACTBL_MOUSE	Beta-actin-like protein 2 OS=Mus musculus GN=Actbl2 PE=1 SV=1	-0.180334	0.0360136	0.9992
Q8BG18	NECA1_MOUSE	N-terminal EF-hand calcium-binding protein 1 OS=Mus musculus GN=Necab1 PE=1 SV=1	0.128764	0.305472	0.9992
Q8BG32	PSD11_MOUSE	26S proteasome non-ATPase regulatory subunit 11 OS=Mus musculus GN=Psmd11 PE=1 SV=3	0.0440306	0.564493	0.9992
Q8BGB7	ENOPH_MOUSE	Enolase-phosphatase E1 OS=Mus musculus GN=Enoph1 PE=1 SV=1	0.029294	0.369993	0.9992
Q8BGQ7	SYAC_MOUSE	Alanine--tRNA ligase, cytoplasmic OS=Mus musculus GN=Aars PE=1 SV=1	-0.0153457	0.765031	0.9992
Q8BGT8	PHIPL_MOUSE	Phytanoyl-CoA hydroxylase-interacting protein-like OS=Mus musculus GN=Phyhipl PE=1 SV=1	0.0426765	0.478584	0.9992
Q8BGZ1	HPCL4_MOUSE	Hippocalcin-like protein 4 OS=Mus musculus GN=Hpcal4 PE=1 SV=3	0.0597954	0.588228	0.9992
Q8BH44	COR2B_MOUSE	Coronin-2B OS=Mus musculus GN=Coro2b PE=1 SV=2	0.279541	0.283657	0.9992
Q8BH58	TIPRL_MOUSE	TIP41-like protein OS=Mus musculus GN=Tiprl PE=1 SV=1	-0.0289351	0.802972	0.9992
Q8BJU0	SGTA_MOUSE	Small glutamine-rich tetratricopeptide repeat-containing protein alpha OS=Mus musculus GN=Sgta PE=1 SV=2	0.00223813	0.971691	0.9992
Q8BJY1	PSMD5_MOUSE	26S proteasome non-ATPase regulatory subunit 5 OS=Mus musculus GN=Psmd5 PE=1 SV=4	0.131413	0.169715	0.9992
Q8BK64	AHSA1_MOUSE	Activator of 90 kDa heat shock protein ATPase homolog 1 OS=Mus musculus GN=Ahsa1 PE=1 SV=2	-0.00366103	0.948294	0.9992
Q8BKC5	IPO5_MOUSE	Importin-5 OS=Mus musculus GN=Ipo5 PE=1 SV=3	-0.0606395	0.511995	0.9992
Q8BLR2	CPNE4_MOUSE	Copine-4 OS=Mus musculus GN=Cpne4 PE=1 SV=1	-0.0439149	0.828127	0.9992
Q8BNW9	KBTBB_MOUSE	Kelch repeat and BTB domain-containing protein 11 OS=Mus musculus GN=Kbtbd11 PE=1 SV=3	-0.0279229	0.875516	0.9992
Q8BP47	SYNC_MOUSE	Asparagine--tRNA ligase, cytoplasmic OS=Mus musculus GN=Nars PE=1 SV=2	-0.118282	0.778393	0.9992
Q8BP67	RL24_MOUSE	60S ribosomal protein L24 OS=Mus musculus GN=Rpl24 PE=1 SV=2	0.196743	0.375133	0.9992
Q8BUV3	GEPH_MOUSE	Gephyrin OS=Mus musculus GN=Gphn PE=1 SV=2	-0.148401	0.102092	0.9992
Q8BVE3	VATH_MOUSE	V-type proton ATPase subunit H OS=Mus musculus GN=Atp6v1h PE=1 SV=1	0.0346625	0.598478	0.9992
Q8BVI4	DHPR_MOUSE	Dihydropteridine reductase OS=Mus musculus GN=Qdpr PE=1 SV=2	-0.0723829	0.0777996	0.9992
Q8BVQ5	PPME1_MOUSE	Protein phosphatase methylesterase 1 OS=Mus musculus GN=Ppme1 PE=1 SV=5	-0.0581187	0.24446	0.9992
Q8BWG8	ARRB1_MOUSE	Beta-arrestin-1 OS=Mus musculus GN=Arrb1 PE=1 SV=1	0.314352	0.315225	0.9992
Q8BYI9	TENR_MOUSE	Tenascin-R OS=Mus musculus GN=Tnr PE=1 SV=2	0.0208127	0.638109	0.9992
Q8C0M9	ASGL1_MOUSE	Isoaspartyl peptidase/L-asparaginase OS=Mus musculus GN=Asrgl1 PE=1 SV=1	-0.0901838	0.449164	0.9992
Q8C166	CPNE1_MOUSE	Copine-1 OS=Mus musculus GN=Cpne1 PE=1 SV=1	0.360235	0.0795812	0.9992
Q8C167	PPCEL_MOUSE	Prolyl endopeptidase-like OS=Mus musculus GN=Prepl PE=1 SV=1	0.0563742	0.448242	0.9992
Q8C1A5	THOP1_MOUSE	Thimet oligopeptidase OS=Mus musculus GN=Thop1 PE=1 SV=1	-0.0566312	0.469339	0.9992
Q8C878	UBA3_MOUSE	NEDD8-activating enzyme E1 catalytic subunit OS=Mus musculus GN=Uba3 PE=1 SV=2	0.0111897	0.928931	0.9992
Q8CAA7	PGM2L_MOUSE	Glucose 1,6-bisphosphate synthase OS=Mus musculus GN=Pgm2l1 PE=1 SV=1	0.0167315	0.552818	0.9992
Q8CAY6	THIC_MOUSE	Acetyl-CoA acetyltransferase, cytosolic OS=Mus musculus GN=Acat2 PE=1 SV=2	0.0861581	0.101236	0.9992
Q8CCT4	TCAL5_MOUSE	Transcription elongation factor A protein-like 5 OS=Mus musculus GN=Tceal5 PE=1 SV=1	0.0195328	0.734565	0.9992
Q8CDN6	TXNL1_MOUSE	Thioredoxin-like protein 1 OS=Mus musculus GN=Txnl1 PE=1 SV=3	0.0737658	0.46551	0.9992
Q8CGA0	PPM1F_MOUSE	Protein phosphatase 1F OS=Mus musculus GN=Ppm1f PE=1 SV=1	0.123692	0.52566	0.9992
Q8CGF6	WDR47_MOUSE	WD repeat-containing protein 47 OS=Mus musculus GN=Wdr47 PE=1 SV=2	-0.172923	0.272348	0.9992
Q8CGY8	OGT1_MOUSE	UDP-N-acetylglucosamine--peptide N-acetylglucosaminyltransferase 110 kDa subunit OS=Mus musculus GN=Ogt PE=1 SV=2	-0.0866901	0.403574	0.9992
Q8CHC4	SYNJ1_MOUSE	Synaptojanin-1 OS=Mus musculus GN=Synj1 PE=1 SV=3	0.0109045	0.818524	0.9992
Q8CHP8	PGP_MOUSE	Glycerol-3-phosphate phosphatase OS=Mus musculus GN=Pgp PE=1 SV=1	0.290747	0.115463	0.9992
Q8CHT1	NGEF_MOUSE	Ephexin-1 OS=Mus musculus GN=Ngef PE=1 SV=1	-0.0894383	0.587222	0.9992
Q8CI94	PYGB_MOUSE	Glycogen phosphorylase, brain form OS=Mus musculus GN=Pygb PE=1 SV=3	-0.0426879	0.277396	0.9992
Q8CIE6	COPA_MOUSE	Coatomer subunit alpha OS=Mus musculus GN=Copa PE=1 SV=2	0.072543	0.194105	0.9992
Q8K0S0	PHYIP_MOUSE	Phytanoyl-CoA hydroxylase-interacting protein OS=Mus musculus GN=Phyhip PE=1 SV=1	0.0325417	0.63958	0.9992
Q8K0U4	HS12A_MOUSE	Heat shock 70 kDa protein 12A OS=Mus musculus GN=Hspa12a PE=1 SV=1	-0.0336312	0.608857	0.9992
Q8K183	PDXK_MOUSE	Pyridoxal kinase OS=Mus musculus GN=Pdxk PE=1 SV=1	0.0338121	0.600734	0.9992
Q8K1M6	DNM1L_MOUSE	Dynamin-1-like protein OS=Mus musculus GN=Dnm1l PE=1 SV=2	-0.0609862	0.266272	0.9992
Q8K2T1	NMRL1_MOUSE	NmrA-like family domain-containing protein 1 OS=Mus musculus GN=Nmral1 PE=1 SV=1	-0.151898	0.392318	0.9992
Q8K354	CBR3_MOUSE	Carbonyl reductase [NADPH] 3 OS=Mus musculus GN=Cbr3 PE=1 SV=1	-0.00740767	0.949679	0.9992
Q8K3H0	DP13A_MOUSE	DCC-interacting protein 13-alpha OS=Mus musculus GN=Appl1 PE=1 SV=1	0.0211623	0.82174	0.9992
Q8K4Z3	NNRE_MOUSE	NAD(P)H-hydrate epimerase OS=Mus musculus GN=Apoa1bp PE=1 SV=1	-0.304116	0.317453	0.9992
Q8R001	MARE2_MOUSE	Microtubule-associated protein RP/EB family member 2 OS=Mus musculus GN=Mapre2 PE=1 SV=1	-0.0168205	0.819038	0.9992
Q8R016	BLMH_MOUSE	Bleomycin hydrolase OS=Mus musculus GN=Blmh PE=1 SV=1	0.109345	0.465552	0.9992
Q8R050	ERF3A_MOUSE	Eukaryotic peptide chain release factor GTP-binding subunit ERF3A OS=Mus musculus GN=Gspt1 PE=1 SV=2	0.0205373	0.86352	0.9992
Q8R071	IP3KA_MOUSE	Inositol-trisphosphate 3-kinase A OS=Mus musculus GN=Itpka PE=1 SV=1	-0.121511	0.0358763	0.9992
Q8R0A7	K0513_MOUSE	Uncharacterized protein KIAA0513 OS=Mus musculus GN=Kiaa0513 PE=1 SV=1	-0.0307003	0.68672	0.9992
Q8R0Y6	AL1L1_MOUSE	Cytosolic 10-formyltetrahydrofolate dehydrogenase OS=Mus musculus GN=Aldh1l1 PE=1 SV=1	-0.0243253	0.717966	0.9992
Q8R146	APEH_MOUSE	Acylamino-acid-releasing enzyme OS=Mus musculus GN=Apeh PE=1 SV=3	0.317007	0.239192	0.9992
Q8R1B4	EIF3C_MOUSE	Eukaryotic translation initiation factor 3 subunit C OS=Mus musculus GN=Eif3c PE=1 SV=1	-0.124802	0.173487	0.9992
Q8R1N4	NUDC3_MOUSE	NudC domain-containing protein 3 OS=Mus musculus GN=Nudcd3 PE=1 SV=3	-0.0741688	0.777593	0.9992
Q8R2R9	AP3M2_MOUSE	AP-3 complex subunit mu-2 OS=Mus musculus GN=Ap3m2 PE=1 SV=1	-0.0392869	0.88918	0.9992
Q8R317	UBQL1_MOUSE	Ubiquilin-1 OS=Mus musculus GN=Ubqln1 PE=1 SV=1	-0.113167	0.254848	0.9992
Q8R3V5	SHLB2_MOUSE	Endophilin-B2 OS=Mus musculus GN=Sh3glb2 PE=1 SV=2	-0.0420851	0.753847	0.9992
Q8R570	SNP47_MOUSE	Synaptosomal-associated protein 47 OS=Mus musculus GN=Snap47 PE=1 SV=1	0.0497735	0.689461	0.9992
Q8VBV7	CSN8_MOUSE	COP9 signalosome complex subunit 8 OS=Mus musculus GN=Cops8 PE=1 SV=1	-0.0530304	0.695049	0.9992
Q8VCR7	ABHEB_MOUSE	Protein ABHD14B OS=Mus musculus GN=Abhd14b PE=1 SV=1	-0.00619129	0.965535	0.9992
Q8VCT3	AMPB_MOUSE	Aminopeptidase B OS=Mus musculus GN=Rnpep PE=1 SV=2	0.138561	0.180718	0.9992
Q8VD04	GRAP1_MOUSE	GRIP1-associated protein 1 OS=Mus musculus GN=Gripap1 PE=1 SV=1	-0.0865448	0.528841	0.9992
Q8VD37	SGIP1_MOUSE	SH3-containing GRB2-like protein 3-interacting protein 1 OS=Mus musculus GN=Sgip1 PE=1 SV=1	-0.0306394	0.859932	0.9992
Q8VDD5	MYH9_MOUSE	Myosin-9 OS=Mus musculus GN=Myh9 PE=1 SV=4	0.158472	0.198174	0.9992
Q8VDM4	PSMD2_MOUSE	26S proteasome non-ATPase regulatory subunit 2 OS=Mus musculus GN=Psmd2 PE=1 SV=1	0.0317736	0.74923	0.9992
Q8VDQ1	PTGR2_MOUSE	Prostaglandin reductase 2 OS=Mus musculus GN=Ptgr2 PE=1 SV=2	0.0870245	0.439279	0.9992
Q8VE33	GD1L1_MOUSE	Ganglioside-induced differentiation-associated protein 1-like 1 OS=Mus musculus GN=Gdap1l1 PE=1 SV=1	0.103924	0.665786	0.9992
Q8VED9	LEGL_MOUSE	Galectin-related protein OS=Mus musculus GN=Lgalsl PE=1 SV=1	-0.0176972	0.894591	0.9992
Q8VEH5	EPMIP_MOUSE	EPM2A-interacting protein 1 OS=Mus musculus GN=Epm2aip1 PE=1 SV=1	-0.0535561	0.590347	0.9992
Q8VEK3	HNRPU_MOUSE	Heterogeneous nuclear ribonucleoprotein U OS=Mus musculus GN=Hnrnpu PE=1 SV=1	-0.0221917	0.830245	0.9992
Q8VIM9	IRGQ_MOUSE	Immunity-related GTPase family Q protein OS=Mus musculus GN=Irgq PE=1 SV=1	0.041415	0.724885	0.9992
Q8VIN1	PEBP2_MOUSE	Phosphatidylethanolamine-binding protein 2 OS=Mus musculus GN=Pbp2 PE=1 SV=1	-0.085808	0.345203	0.9992
Q91V12	BACH_MOUSE	Cytosolic acyl coenzyme A thioester hydrolase OS=Mus musculus GN=Acot7 PE=1 SV=2	-0.00786569	0.864204	0.9992
Q91V41	RAB14_MOUSE	Ras-related protein Rab-14 OS=Mus musculus GN=Rab14 PE=1 SV=3	0.078738	0.357788	0.9992
Q91V64	ISOC1_MOUSE	Isochorismatase domain-containing protein 1 OS=Mus musculus GN=Isoc1 PE=1 SV=1	0.0946501	0.359158	0.9992
Q91V92	ACLY_MOUSE	ATP-citrate synthase OS=Mus musculus GN=Acly PE=1 SV=1	0.0842553	0.0355772	0.9992
Q91VI7	RINI_MOUSE	Ribonuclease inhibitor OS=Mus musculus GN=Rnh1 PE=1 SV=1	0.0267051	0.888917	0.9992
Q91VM9	IPYR2_MOUSE	Inorganic pyrophosphatase 2, mitochondrial OS=Mus musculus GN=Ppa2 PE=1 SV=1	0.0736267	0.621219	0.9992
Q91VR5	DDX1_MOUSE	ATP-dependent RNA helicase DDX1 OS=Mus musculus GN=Ddx1 PE=1 SV=1	-0.0203752	0.847608	0.9992
Q91VR7	MLP3A_MOUSE	Microtubule-associated proteins 1A/1B light chain 3A OS=Mus musculus GN=Map1lc3a PE=1 SV=1	0.016044	0.893053	0.9992
Q91VW3	SH3L3_MOUSE	SH3 domain-binding glutamic acid-rich-like protein 3 OS=Mus musculus GN=Sh3bgrl3 PE=1 SV=1	0.279153	0.0635084	0.9992
Q91W50	CSDE1_MOUSE	Cold shock domain-containing protein E1 OS=Mus musculus GN=Csde1 PE=1 SV=1	-0.115376	0.52309	0.9992
Q91W69	EPN3_MOUSE	Epsin-3 OS=Mus musculus GN=Epn3 PE=1 SV=1	-0.205427	0.134881	0.9992
Q91WQ3	SYYC_MOUSE	Tyrosine--tRNA ligase, cytoplasmic OS=Mus musculus GN=Yars PE=1 SV=3	0.0493047	0.656069	0.9992
Q91X97	NCALD_MOUSE	Neurocalcin-delta OS=Mus musculus GN=Ncald PE=1 SV=4	0.011427	0.906443	0.9992
Q91XU3	PI42C_MOUSE	Phosphatidylinositol 5-phosphate 4-kinase type-2 gamma OS=Mus musculus GN=Pip4k2c PE=1 SV=1	0.117378	0.416859	0.9992
Q91YS8	KCC1A_MOUSE	Calcium/calmodulin-dependent protein kinase type 1 OS=Mus musculus GN=Camk1 PE=1 SV=1	0.235601	0.193898	0.9992
Q91Z53	GRHPR_MOUSE	Glyoxylate reductase/hydroxypyruvate reductase OS=Mus musculus GN=Grhpr PE=1 SV=1	-0.00870055	0.856554	0.9992
Q91Z61	DIRA1_MOUSE	GTP-binding protein Di-Ras1 OS=Mus musculus GN=Diras1 PE=1 SV=1	0.129329	0.53589	0.9992
Q91ZJ5	UGPA_MOUSE	UTP--glucose-1-phosphate uridylyltransferase OS=Mus musculus GN=Ugp2 PE=1 SV=3	0.166553	0.215701	0.9992
Q91ZP9	NECA2_MOUSE	N-terminal EF-hand calcium-binding protein 2 OS=Mus musculus GN=Necab2 PE=1 SV=1	0.129162	0.13813	0.9992
Q91ZZ3	SYUB_MOUSE	Beta-synuclein OS=Mus musculus GN=Sncb PE=1 SV=1	-0.0655554	0.111736	0.9992
Q920E5	FPPS_MOUSE	Farnesyl pyrophosphate synthase OS=Mus musculus GN=Fdps PE=1 SV=1	0.0587562	0.508353	0.9992
Q920P5	KAD5_MOUSE	Adenylate kinase isoenzyme 5 OS=Mus musculus GN=Ak5 PE=1 SV=2	0.061402	0.475178	0.9992
Q921I1	TRFE_MOUSE	Serotransferrin OS=Mus musculus GN=Tf PE=1 SV=1	-0.0100883	0.922888	0.9992
Q921M7	FA49B_MOUSE	Protein FAM49B OS=Mus musculus GN=Fam49b PE=1 SV=1	-0.0277302	0.626357	0.9992
Q922B2	SYDC_MOUSE	Aspartate--tRNA ligase, cytoplasmic OS=Mus musculus GN=Dars PE=1 SV=2	0.194099	0.115085	0.9992
Q922F4	TBB6_MOUSE	Tubulin beta-6 chain OS=Mus musculus GN=Tubb6 PE=1 SV=1	-0.187765	0.186102	0.9992
Q923D2	BLVRB_MOUSE	Flavin reductase (NADPH) OS=Mus musculus GN=Blvrb PE=1 SV=3	-0.0564859	0.512098	0.9992
Q924M7	MPI_MOUSE	Mannose-6-phosphate isomerase OS=Mus musculus GN=Mpi PE=1 SV=1	-0.038619	0.42355	0.9992
Q93092	TALDO_MOUSE	Transaldolase OS=Mus musculus GN=Taldo1 PE=1 SV=2	0.00784449	0.874434	0.9992
Q99104	MYO5A_MOUSE	Unconventional myosin-Va OS=Mus musculus GN=Myo5a PE=1 SV=2	-0.0831475	0.31126	0.9992
Q99JW2	ACY1_MOUSE	Aminoacylase-1 OS=Mus musculus GN=Acy1 PE=1 SV=1	-0.0785071	0.467512	0.9992
Q99JY9	ARP3_MOUSE	Actin-related protein 3 OS=Mus musculus GN=Actr3 PE=1 SV=3	-0.0278488	0.59327	0.9992
Q99K51	PLST_MOUSE	Plastin-3 OS=Mus musculus GN=Pls3 PE=1 SV=3	-0.172666	0.0900643	0.9992
Q99K85	SERC_MOUSE	Phosphoserine aminotransferase OS=Mus musculus GN=Psat1 PE=1 SV=1	0.02059	0.751858	0.9992
Q99KB8	GLO2_MOUSE	Hydroxyacylglutathione hydrolase, mitochondrial OS=Mus musculus GN=Hagh PE=1 SV=2	-0.0107469	0.934447	0.9992
Q99KJ8	DCTN2_MOUSE	Dynactin subunit 2 OS=Mus musculus GN=Dctn2 PE=1 SV=3	0.0584345	0.470094	0.9992
Q99KK7	DPP3_MOUSE	Dipeptidyl peptidase 3 OS=Mus musculus GN=Dpp3 PE=1 SV=2	0.173119	0.350301	0.9992
Q99KP3	CRYL1_MOUSE	Lambda-crystallin homolog OS=Mus musculus GN=Cryl1 PE=1 SV=3	-0.0175404	0.872864	0.9992
Q99KQ4	NAMPT_MOUSE	Nicotinamide phosphoribosyltransferase OS=Mus musculus GN=Nampt PE=1 SV=1	0.183191	0.0706638	0.9992
Q99L47	F10A1_MOUSE	Hsc70-interacting protein OS=Mus musculus GN=St13 PE=1 SV=1	0.0816405	0.0469914	0.9992
Q99LB6	MAT2B_MOUSE	Methionine adenosyltransferase 2 subunit beta OS=Mus musculus GN=Mat2b PE=1 SV=1	-0.0711039	0.688947	0.9992
Q99LD4	CSN1_MOUSE	COP9 signalosome complex subunit 1 OS=Mus musculus GN=Gps1 PE=1 SV=1	-0.24099	0.366443	0.9992
Q99LF4	RTCB_MOUSE	tRNA-splicing ligase RtcB homolog OS=Mus musculus GN=Rtcb PE=1 SV=1	-0.0212781	0.863016	0.9992
Q99LG2	TNPO2_MOUSE	Transportin-2 OS=Mus musculus GN=Tnpo2 PE=1 SV=1	0.142482	0.413461	0.9992
Q99LT0	DPY30_MOUSE	Protein dpy-30 homolog OS=Mus musculus GN=Dpy30 PE=1 SV=1	0.11135	0.293835	0.9992
Q99MK8	ARBK1_MOUSE	Beta-adrenergic receptor kinase 1 OS=Mus musculus GN=Adrbk1 PE=1 SV=2	0.0384061	0.775392	0.9992
Q99MN1	SYK_MOUSE	Lysine--tRNA ligase OS=Mus musculus GN=Kars PE=1 SV=1	-0.0535862	0.384734	0.9992
Q99PT1	GDIR1_MOUSE	Rho GDP-dissociation inhibitor 1 OS=Mus musculus GN=Arhgdia PE=1 SV=3	0.0212785	0.782863	0.9992
Q9CPU0	LGUL_MOUSE	Lactoylglutathione lyase OS=Mus musculus GN=Glo1 PE=1 SV=3	0.00535296	0.923074	0.9992
Q9CPV4	GLOD4_MOUSE	Glyoxalase domain-containing protein 4 OS=Mus musculus GN=Glod4 PE=1 SV=1	-0.0199879	0.764975	0.9992
Q9CPY7	AMPL_MOUSE	Cytosol aminopeptidase OS=Mus musculus GN=Lap3 PE=1 SV=3	-0.0399268	0.376082	0.9992
Q9CQ60	6PGL_MOUSE	6-phosphogluconolactonase OS=Mus musculus GN=Pgls PE=1 SV=1	-0.0621325	0.525732	0.9992
Q9CQD1	RAB5A_MOUSE	Ras-related protein Rab-5A OS=Mus musculus GN=Rab5a PE=1 SV=1	-0.00227242	0.987264	0.9992
Q9CQI3	GMFB_MOUSE	Glia maturation factor beta OS=Mus musculus GN=Gmfb PE=1 SV=3	0.0570079	0.488838	0.9992
Q9CQI6	COTL1_MOUSE	Coactosin-like protein OS=Mus musculus GN=Cotl1 PE=1 SV=3	0.0238628	0.603862	0.9992
Q9CQM5	TXD17_MOUSE	Thioredoxin domain-containing protein 17 OS=Mus musculus GN=Txndc17 PE=1 SV=1	-0.36693	0.0717352	0.9992
Q9CQM9	GLRX3_MOUSE	Glutaredoxin-3 OS=Mus musculus GN=Glrx3 PE=1 SV=1	-0.00378649	0.964319	0.9992
Q9CQV6	MLP3B_MOUSE	Microtubule-associated proteins 1A/1B light chain 3B OS=Mus musculus GN=Map1lc3b PE=1 SV=3	0.217978	0.366884	0.9992
Q9CQV8	1433B_MOUSE	14-3-3 protein beta/alpha OS=Mus musculus GN=Ywhab PE=1 SV=3	-0.0523433	0.286762	0.9992
Q9CQW1	YKT6_MOUSE	Synaptobrevin homolog YKT6 OS=Mus musculus GN=Ykt6 PE=1 SV=1	0.152526	0.167144	0.9992
Q9CQZ1	HSBP1_MOUSE	Heat shock factor-binding protein 1 OS=Mus musculus GN=Hsbp1 PE=1 SV=1	0.148796	0.286718	0.9992
Q9CR16	PPID_MOUSE	Peptidyl-prolyl cis-trans isomerase D OS=Mus musculus GN=Ppid PE=1 SV=3	0.0155612	0.731745	0.9992
Q9CR57	RL14_MOUSE	60S ribosomal protein L14 OS=Mus musculus GN=Rpl14 PE=1 SV=3	0.256256	0.0773798	0.9992
Q9CRC8	LRC40_MOUSE	Leucine-rich repeat-containing protein 40 OS=Mus musculus GN=Lrrc40 PE=1 SV=2	-0.0617629	0.222661	0.9992
Q9CVB6	ARPC2_MOUSE	Actin-related protein 2/3 complex subunit 2 OS=Mus musculus GN=Arpc2 PE=1 SV=3	-0.0562119	0.334063	0.9992
Q9CWF2	TBB2B_MOUSE	Tubulin beta-2B chain OS=Mus musculus GN=Tubb2b PE=1 SV=1	0.0168434	0.775409	0.9992
Q9CWJ9	PUR9_MOUSE	Bifunctional purine biosynthesis protein PURH OS=Mus musculus GN=Atic PE=1 SV=2	0.0236071	0.800456	0.9992
Q9CWM4	PFD1_MOUSE	Prefoldin subunit 1 OS=Mus musculus GN=Pfdn1 PE=1 SV=1	0.0202227	0.789818	0.9992
Q9CWS0	DDAH1_MOUSE	N(G),N(G)-dimethylarginine dimethylaminohydrolase 1 OS=Mus musculus GN=Ddah1 PE=1 SV=3	-0.00234897	0.96991	0.9992
Q9CXW4	RL11_MOUSE	60S ribosomal protein L11 OS=Mus musculus GN=Rpl11 PE=1 SV=4	0.142842	0.244471	0.9992
Q9CYR6	AGM1_MOUSE	Phosphoacetylglucosamine mutase OS=Mus musculus GN=Pgm3 PE=1 SV=1	-0.049167	0.738657	0.9992
Q9CYT6	CAP2_MOUSE	Adenylyl cyclase-associated protein 2 OS=Mus musculus GN=Cap2 PE=1 SV=1	-0.0302178	0.574549	0.9992
Q9CZ04	CSN7A_MOUSE	COP9 signalosome complex subunit 7a OS=Mus musculus GN=Cops7a PE=1 SV=2	0.0353287	0.746972	0.9992
Q9CZ30	OLA1_MOUSE	Obg-like ATPase 1 OS=Mus musculus GN=Ola1 PE=1 SV=1	0.0579801	0.306983	0.9992
Q9CZ44	NSF1C_MOUSE	NSFL1 cofactor p47 OS=Mus musculus GN=Nsfl1c PE=1 SV=1	0.0474042	0.483284	0.9992
Q9CZC8	SCRN1_MOUSE	Secernin-1 OS=Mus musculus GN=Scrn1 PE=1 SV=1	0.0286625	0.425297	0.9992
Q9CZD3	SYG_MOUSE	Glycine--tRNA ligase OS=Mus musculus GN=Gars PE=1 SV=1	-0.014643	0.894981	0.9992
Q9CZM2	RL15_MOUSE	60S ribosomal protein L15 OS=Mus musculus GN=Rpl15 PE=2 SV=4	-0.135636	0.387199	0.9992
Q9CZX8	RS19_MOUSE	40S ribosomal protein S19 OS=Mus musculus GN=Rps19 PE=1 SV=3	-0.0768533	0.56381	0.9992
Q9CZY3	UB2V1_MOUSE	Ubiquitin-conjugating enzyme E2 variant 1 OS=Mus musculus GN=Ube2v1 PE=1 SV=1	0.0493862	0.542333	0.9992
Q9D0F9	PGM1_MOUSE	Phosphoglucomutase-1 OS=Mus musculus GN=Pgm1 PE=1 SV=4	-0.0159329	0.590632	0.9992
Q9D0I9	SYRC_MOUSE	Arginine--tRNA ligase, cytoplasmic OS=Mus musculus GN=Rars PE=1 SV=2	0.0785274	0.659401	0.9992
Q9D0J8	PTMS_MOUSE	Parathymosin OS=Mus musculus GN=Ptms PE=1 SV=3	-0.00520423	0.935792	0.9992
Q9D0M5	DYL2_MOUSE	Dynein light chain 2, cytoplasmic OS=Mus musculus GN=Dynll2 PE=1 SV=1	0.0832025	0.278916	0.9992
Q9D0R2	SYTC_MOUSE	Threonine--tRNA ligase, cytoplasmic OS=Mus musculus GN=Tars PE=1 SV=2	0.0657479	0.882901	0.9992
Q9D154	ILEUA_MOUSE	Leukocyte elastase inhibitor A OS=Mus musculus GN=Serpinb1a PE=1 SV=1	0.0446701	0.625492	0.9992
Q9D1A2	CNDP2_MOUSE	Cytosolic non-specific dipeptidase OS=Mus musculus GN=Cndp2 PE=1 SV=1	0.0613197	0.244392	0.9992
Q9D1K2	VATF_MOUSE	V-type proton ATPase subunit F OS=Mus musculus GN=Atp6v1f PE=1 SV=2	0.0404028	0.544009	0.9992
Q9D1P4	CHRD1_MOUSE	Cysteine and histidine-rich domain-containing protein 1 OS=Mus musculus GN=Chordc1 PE=1 SV=1	0.281879	0.32621	0.9992
Q9D1X0	NOL3_MOUSE	Nucleolar protein 3 OS=Mus musculus GN=Nol3 PE=1 SV=1	0.0614289	0.380872	0.9992
Q9D2V7	CORO7_MOUSE	Coronin-7 OS=Mus musculus GN=Coro7 PE=1 SV=2	0.00846576	0.913908	0.9992
Q9D358	PPAC_MOUSE	Low molecular weight phosphotyrosine protein phosphatase OS=Mus musculus GN=Acp1 PE=1 SV=3	-0.0593627	0.430557	0.9992
Q9D394	RUFY3_MOUSE	Protein RUFY3 OS=Mus musculus GN=Rufy3 PE=1 SV=1	0.0515793	0.478558	0.9992
Q9D5V5	CUL5_MOUSE	Cullin-5 OS=Mus musculus GN=Cul5 PE=1 SV=3	-0.00652179	0.962249	0.9992
Q9D6F9	TBB4A_MOUSE	Tubulin beta-4A chain OS=Mus musculus GN=Tubb4a PE=1 SV=3	-0.0946333	0.0446931	0.9992
Q9D7G0	PRPS1_MOUSE	Ribose-phosphate pyrophosphokinase 1 OS=Mus musculus GN=Prps1 PE=1 SV=4	0.12403	0.68801	0.9992
Q9D7X3	DUS3_MOUSE	Dual specificity protein phosphatase 3 OS=Mus musculus GN=Dusp3 PE=1 SV=1	0.0247019	0.599459	0.9992
Q9D7X8	GGCT_MOUSE	Gamma-glutamylcyclotransferase OS=Mus musculus GN=Ggct PE=1 SV=1	0.0633234	0.496481	0.9992
Q9D819	IPYR_MOUSE	Inorganic pyrophosphatase OS=Mus musculus GN=Ppa1 PE=1 SV=1	-0.0600963	0.503957	0.9992
Q9D892	ITPA_MOUSE	Inosine triphosphate pyrophosphatase OS=Mus musculus GN=Itpa PE=1 SV=2	0.19156	0.320662	0.9992
Q9D898	ARP5L_MOUSE	Actin-related protein 2/3 complex subunit 5-like protein OS=Mus musculus GN=Arpc5l PE=1 SV=1	0.0227401	0.783776	0.9992
Q9D8N0	EF1G_MOUSE	Elongation factor 1-gamma OS=Mus musculus GN=Eef1g PE=1 SV=3	0.0557989	0.292728	0.9992
Q9D8W5	PSD12_MOUSE	26S proteasome non-ATPase regulatory subunit 12 OS=Mus musculus GN=Psmd12 PE=1 SV=4	-0.0555836	0.664961	0.9992
Q9D8Y0	EFHD2_MOUSE	EF-hand domain-containing protein D2 OS=Mus musculus GN=Efhd2 PE=1 SV=1	-0.0279572	0.668118	0.9992
Q9D906	ATG7_MOUSE	Ubiquitin-like modifier-activating enzyme ATG7 OS=Mus musculus GN=Atg7 PE=1 SV=1	-0.0512334	0.857586	0.9992
Q9DAK9	PHP14_MOUSE	14 kDa phosphohistidine phosphatase OS=Mus musculus GN=Phpt1 PE=1 SV=1	-0.0639603	0.624779	0.9992
Q9DAR7	DCPS_MOUSE	m7GpppX diphosphatase OS=Mus musculus GN=Dcps PE=1 SV=1	0.137853	0.356137	0.9992
Q9DB05	SNAA_MOUSE	Alpha-soluble NSF attachment protein OS=Mus musculus GN=Napa PE=1 SV=1	-0.0355101	0.83549	0.9992
Q9DB27	MCTS1_MOUSE	Malignant T-cell-amplified sequence 1 OS=Mus musculus GN=Mcts1 PE=1 SV=1	0.0240943	0.837795	0.9992
Q9DBG3	AP2B1_MOUSE	AP-2 complex subunit beta OS=Mus musculus GN=Ap2b1 PE=1 SV=1	-0.00817438	0.915719	0.9992
Q9DBJ1	PGAM1_MOUSE	Phosphoglycerate mutase 1 OS=Mus musculus GN=Pgam1 PE=1 SV=3	-0.0381979	0.56078	0.9992
Q9DBP5	KCY_MOUSE	UMP-CMP kinase OS=Mus musculus GN=Cmpk1 PE=1 SV=1	-0.00344754	0.950869	0.9992
Q9DCD0	6PGD_MOUSE	6-phosphogluconate dehydrogenase, decarboxylating OS=Mus musculus GN=Pgd PE=1 SV=3	0.00545499	0.960804	0.9992
Q9DCH4	EIF3F_MOUSE	Eukaryotic translation initiation factor 3 subunit F OS=Mus musculus GN=Eif3f PE=1 SV=2	0.0340148	0.737745	0.9992
Q9DD18	DTD1_MOUSE	D-tyrosyl-tRNA(Tyr) deacylase 1 OS=Mus musculus GN=Dtd1 PE=1 SV=2	-0.122374	0.254444	0.9992
Q9EPK7	XPO7_MOUSE	Exportin-7 OS=Mus musculus GN=Xpo7 PE=1 SV=3	-0.0034588	0.971691	0.9992
Q9EPN1	NBEA_MOUSE	Neurobeachin OS=Mus musculus GN=Nbea PE=1 SV=1	-0.00201457	0.979833	0.9992
Q9EQF6	DPYL5_MOUSE	Dihydropyrimidinase-related protein 5 OS=Mus musculus GN=Dpysl5 PE=1 SV=1	0.01522	0.834251	0.9992
Q9EQH3	VPS35_MOUSE	Vacuolar protein sorting-associated protein 35 OS=Mus musculus GN=Vps35 PE=1 SV=1	0.115747	0.763402	0.9992
Q9EQQ9	OGA_MOUSE	Protein O-GlcNAcase OS=Mus musculus GN=Mgea5 PE=1 SV=2	0.000707299	0.98916	0.9992
Q9EQU5	SET_MOUSE	Protein SET OS=Mus musculus GN=Set PE=1 SV=1	0.0399883	0.52599	0.9992
Q9ERD7	TBB3_MOUSE	Tubulin beta-3 chain OS=Mus musculus GN=Tubb3 PE=1 SV=1	0.00101185	0.988749	0.9992
Q9ERK4	XPO2_MOUSE	Exportin-2 OS=Mus musculus GN=Cse1l PE=1 SV=1	0.0518178	0.546002	0.9992
Q9ESJ4	SPN90_MOUSE	NCK-interacting protein with SH3 domain OS=Mus musculus GN=Nckipsd PE=1 SV=2	-0.17384	0.40598	0.9992
Q9ESM3	HPLN2_MOUSE	Hyaluronan and proteoglycan link protein 2 OS=Mus musculus GN=Hapln2 PE=1 SV=1	0.0340234	0.741791	0.9992
Q9JHK4	PGTA_MOUSE	Geranylgeranyl transferase type-2 subunit alpha OS=Mus musculus GN=Rabggta PE=1 SV=1	0.166995	0.0663923	0.9992
Q9JHU4	DYHC1_MOUSE	Cytoplasmic dynein 1 heavy chain 1 OS=Mus musculus GN=Dync1h1 PE=1 SV=2	0.0089495	0.796608	0.9992
Q9JI46	NUDT3_MOUSE	Diphosphoinositol polyphosphate phosphohydrolase 1 OS=Mus musculus GN=Nudt3 PE=1 SV=1	0.0987949	0.228432	0.9992
Q9JI90	RNF14_MOUSE	E3 ubiquitin-protein ligase RNF14 OS=Mus musculus GN=Rnf14 PE=1 SV=2	-0.301018	0.109076	0.9992
Q9JIF0	ANM1_MOUSE	Protein arginine N-methyltransferase 1 OS=Mus musculus GN=Prmt1 PE=1 SV=1	0.00798577	0.89738	0.9992
Q9JIF7	COPB_MOUSE	Coatomer subunit beta OS=Mus musculus GN=Copb1 PE=1 SV=1	-0.14364	0.316324	0.9992
Q9JII6	AK1A1_MOUSE	Alcohol dehydrogenase [NADP(+)] OS=Mus musculus GN=Akr1a1 PE=1 SV=3	0.0119257	0.833932	0.9992
Q9JJ28	FLII_MOUSE	Protein flightless-1 homolog OS=Mus musculus GN=Flii PE=1 SV=1	0.283467	0.649047	0.9992
Q9JJU8	SH3L1_MOUSE	SH3 domain-binding glutamic acid-rich-like protein OS=Mus musculus GN=Sh3bgrl PE=1 SV=1	-0.112161	0.47607	0.9992
Q9JJV2	PROF2_MOUSE	Profilin-2 OS=Mus musculus GN=Pfn2 PE=1 SV=3	0.00264046	0.948456	0.9992
Q9JJZ2	TBA8_MOUSE	Tubulin alpha-8 chain OS=Mus musculus GN=Tuba8 PE=1 SV=1	-0.0370792	0.800899	0.9992
Q9JKB1	UCHL3_MOUSE	Ubiquitin carboxyl-terminal hydrolase isozyme L3 OS=Mus musculus GN=Uchl3 PE=1 SV=2	0.133667	0.23538	0.9992
Q9JKK7	TMOD2_MOUSE	Tropomodulin-2 OS=Mus musculus GN=Tmod2 PE=1 SV=2	0.0227991	0.741552	0.9992
Q9JLJ2	AL9A1_MOUSE	4-trimethylaminobutyraldehyde dehydrogenase OS=Mus musculus GN=Aldh9a1 PE=1 SV=1	0.0907226	0.564008	0.9992
Q9JLM8	DCLK1_MOUSE	Serine/threonine-protein kinase DCLK1 OS=Mus musculus GN=Dclk1 PE=1 SV=1	-0.0551817	0.593226	0.9992
Q9JLV5	CUL3_MOUSE	Cullin-3 OS=Mus musculus GN=Cul3 PE=1 SV=1	-0.21125	0.313054	0.9992
Q9JM14	NT5C_MOUSE	5'(3')-deoxyribonucleotidase, cytosolic type OS=Mus musculus GN=Nt5c PE=1 SV=1	0.139065	0.123703	0.9992
Q9JMA1	UBP14_MOUSE	Ubiquitin carboxyl-terminal hydrolase 14 OS=Mus musculus GN=Usp14 PE=1 SV=3	0.41054	0.159304	0.9992
Q9JME5	AP3B2_MOUSE	AP-3 complex subunit beta-2 OS=Mus musculus GN=Ap3b2 PE=1 SV=2	0.02686	0.556579	0.9992
Q9JMG7	HDGR3_MOUSE	Hepatoma-derived growth factor-related protein 3 OS=Mus musculus GN=Hdgfrp3 PE=1 SV=2	0.188972	0.0434447	0.9992
Q9QUH0	GLRX1_MOUSE	Glutaredoxin-1 OS=Mus musculus GN=Glrx PE=1 SV=3	-0.0570863	0.732339	0.9992
Q9QUI0	RHOA_MOUSE	Transforming protein RhoA OS=Mus musculus GN=Rhoa PE=1 SV=1	0.0449297	0.471838	0.9992
Q9QUP5	HPLN1_MOUSE	Hyaluronan and proteoglycan link protein 1 OS=Mus musculus GN=Hapln1 PE=1 SV=1	-0.202557	0.269364	0.9992
Q9QUR6	PPCE_MOUSE	Prolyl endopeptidase OS=Mus musculus GN=Prep PE=1 SV=1	0.00253463	0.985445	0.9992
Q9QUR7	PIN1_MOUSE	Peptidyl-prolyl cis-trans isomerase NIMA-interacting 1 OS=Mus musculus GN=Pin1 PE=1 SV=1	-0.0678116	0.51449	0.9992
Q9QVP9	FAK2_MOUSE	Protein-tyrosine kinase 2-beta OS=Mus musculus GN=Ptk2b PE=1 SV=2	-0.0702367	0.40013	0.9992
Q9QXB9	DRG2_MOUSE	Developmentally-regulated GTP-binding protein 2 OS=Mus musculus GN=Drg2 PE=1 SV=1	0.0393253	0.570483	0.9992
Q9QXL2	KI21A_MOUSE	Kinesin-like protein KIF21A OS=Mus musculus GN=Kif21a PE=1 SV=2	-0.0961288	0.552284	0.9992
Q9QXS1	PLEC_MOUSE	Plectin OS=Mus musculus GN=Plec PE=1 SV=3	-0.009504	0.91495	0.9992
Q9QXS6	DREB_MOUSE	Drebrin OS=Mus musculus GN=Dbn1 PE=1 SV=4	-0.0651854	0.49679	0.9992
Q9QYB5	ADDG_MOUSE	Gamma-adducin OS=Mus musculus GN=Add3 PE=1 SV=2	-0.35488	0.100253	0.9992
Q9QYB8	ADDB_MOUSE	Beta-adducin OS=Mus musculus GN=Add2 PE=1 SV=4	-0.0887243	0.183224	0.9992
Q9QYC0	ADDA_MOUSE	Alpha-adducin OS=Mus musculus GN=Add1 PE=1 SV=2	-0.157434	0.0191928	0.9992
Q9QYG0	NDRG2_MOUSE	Protein NDRG2 OS=Mus musculus GN=Ndrg2 PE=1 SV=1	0.0287751	0.634732	0.9992
Q9QYR6	MAP1A_MOUSE	Microtubule-associated protein 1A OS=Mus musculus GN=Map1a PE=1 SV=2	0.0296946	0.442295	0.9992
Q9QZ06	TOLIP_MOUSE	Toll-interacting protein OS=Mus musculus GN=Tollip PE=1 SV=1	-0.0381815	0.708952	0.9992
Q9QZD9	EIF3I_MOUSE	Eukaryotic translation initiation factor 3 subunit I OS=Mus musculus GN=Eif3i PE=1 SV=1	-0.364191	0.313396	0.9992
Q9QZE5	COPG1_MOUSE	Coatomer subunit gamma-1 OS=Mus musculus GN=Copg1 PE=1 SV=1	-0.0179874	0.895015	0.9992
Q9QZE7	TSNAX_MOUSE	Translin-associated protein X OS=Mus musculus GN=Tsnax PE=1 SV=1	0.165264	0.243896	0.9992
Q9QZM0	UBQL2_MOUSE	Ubiquilin-2 OS=Mus musculus GN=Ubqln2 PE=1 SV=2	-0.149122	0.246178	0.9992
Q9QZX7	SRR_MOUSE	Serine racemase OS=Mus musculus GN=Srr PE=1 SV=1	-0.108241	0.219316	0.9992
Q9R0P3	ESTD_MOUSE	S-formylglutathione hydrolase OS=Mus musculus GN=Esd PE=1 SV=1	0.0183692	0.903505	0.9992
Q9R0P5	DEST_MOUSE	Destrin OS=Mus musculus GN=Dstn PE=1 SV=3	-0.0353918	0.498314	0.9992
Q9R0P9	UCHL1_MOUSE	Ubiquitin carboxyl-terminal hydrolase isozyme L1 OS=Mus musculus GN=Uchl1 PE=1 SV=1	0.0318766	0.519947	0.9992
Q9R0Q6	ARC1A_MOUSE	Actin-related protein 2/3 complex subunit 1A OS=Mus musculus GN=Arpc1a PE=1 SV=1	-0.02006	0.721616	0.9992
Q9R0Q7	TEBP_MOUSE	Prostaglandin E synthase 3 OS=Mus musculus GN=Ptges3 PE=1 SV=1	0.0932061	0.406102	0.9992
Q9R0Y5	KAD1_MOUSE	Adenylate kinase isoenzyme 1 OS=Mus musculus GN=Ak1 PE=1 SV=1	0.0247591	0.615134	0.9992
Q9R111	GUAD_MOUSE	Guanine deaminase OS=Mus musculus GN=Gda PE=1 SV=1	0.0108249	0.815787	0.9992
Q9R1P1	PSB3_MOUSE	Proteasome subunit beta type-3 OS=Mus musculus GN=Psmb3 PE=1 SV=1	0.310762	0.235686	0.9992
Q9R1Q8	TAGL3_MOUSE	Transgelin-3 OS=Mus musculus GN=Tagln3 PE=1 SV=1	-0.00739204	0.894954	0.9992
Q9R1T2	SAE1_MOUSE	SUMO-activating enzyme subunit 1 OS=Mus musculus GN=Sae1 PE=1 SV=1	0.0578709	0.635401	0.9992
Q9WTL7	LYPA2_MOUSE	Acyl-protein thioesterase 2 OS=Mus musculus GN=Lypla2 PE=1 SV=1	0.0578923	0.416462	0.9992
Q9WTU6	MK09_MOUSE	Mitogen-activated protein kinase 9 OS=Mus musculus GN=Mapk9 PE=1 SV=2	0.107733	0.374459	0.9992
Q9WTX5	SKP1_MOUSE	S-phase kinase-associated protein 1 OS=Mus musculus GN=Skp1 PE=1 SV=3	-0.0594633	0.321728	0.9992
Q9WU28	PFD5_MOUSE	Prefoldin subunit 5 OS=Mus musculus GN=Pfdn5 PE=1 SV=1	-0.0150476	0.894015	0.9992
Q9WU78	PDC6I_MOUSE	Programmed cell death 6-interacting protein OS=Mus musculus GN=Pdcd6ip PE=1 SV=3	0.00900704	0.945371	0.9992
Q9WUA2	SYFB_MOUSE	Phenylalanine--tRNA ligase beta subunit OS=Mus musculus GN=Farsb PE=1 SV=2	-0.0664605	0.708089	0.9992
Q9WUA3	PFKAP_MOUSE	ATP-dependent 6-phosphofructokinase, platelet type OS=Mus musculus GN=Pfkp PE=1 SV=1	0.0221161	0.613123	0.9992
Q9WUB3	PYGM_MOUSE	Glycogen phosphorylase, muscle form OS=Mus musculus GN=Pygm PE=1 SV=3	0.0073674	0.927477	0.9992
Q9WUK2	IF4H_MOUSE	Eukaryotic translation initiation factor 4H OS=Mus musculus GN=Eif4h PE=1 SV=3	-0.166876	0.150918	0.9992
Q9WUL7	ARL3_MOUSE	ADP-ribosylation factor-like protein 3 OS=Mus musculus GN=Arl3 PE=1 SV=1	0.0809984	0.25222	0.9992
Q9WUM3	COR1B_MOUSE	Coronin-1B OS=Mus musculus GN=Coro1b PE=1 SV=1	0.0464294	0.594601	0.9992
Q9WUM4	COR1C_MOUSE	Coronin-1C OS=Mus musculus GN=Coro1c PE=1 SV=2	0.0482395	0.403402	0.9992
Q9WV69	DEMA_MOUSE	Dematin OS=Mus musculus GN=Dmtn PE=1 SV=1	-0.0122317	0.921792	0.9992
Q9WV92	E41L3_MOUSE	Band 4.1-like protein 3 OS=Mus musculus GN=Epb41l3 PE=1 SV=1	-0.0483235	0.38437	0.9992
Q9WVL0	MAAI_MOUSE	Maleylacetoacetate isomerase OS=Mus musculus GN=Gstz1 PE=1 SV=1	-0.0919063	0.612142	0.9992
Q9Z0E0	NCDN_MOUSE	Neurochondrin OS=Mus musculus GN=Ncdn PE=1 SV=1	-0.0274005	0.647956	0.9992
Q9Z0H8	CLIP2_MOUSE	CAP-Gly domain-containing linker protein 2 OS=Mus musculus GN=Clip2 PE=1 SV=2	0.145143	0.262925	0.9992
Q9Z0N1	IF2G_MOUSE	Eukaryotic translation initiation factor 2 subunit 3, X-linked OS=Mus musculus GN=Eif2s3x PE=1 SV=2	-0.0793873	0.301438	0.9992
Q9Z0S1	BPNT1_MOUSE	3'(2'),5'-bisphosphate nucleotidase 1 OS=Mus musculus GN=Bpnt1 PE=1 SV=2	0.166851	0.523754	0.9992
Q9Z140	CPNE6_MOUSE	Copine-6 OS=Mus musculus GN=Cpne6 PE=1 SV=1	0.0729336	0.170092	0.9992
Q9Z1B3	PLCB1_MOUSE	1-phosphatidylinositol 4,5-bisphosphate phosphodiesterase beta-1 OS=Mus musculus GN=Plcb1 PE=1 SV=2	0.0407051	0.4784	0.9992
Q9Z1F9	SAE2_MOUSE	SUMO-activating enzyme subunit 2 OS=Mus musculus GN=Uba2 PE=1 SV=1	-0.0568044	0.43606	0.9992
Q9Z1G3	VATC1_MOUSE	V-type proton ATPase subunit C 1 OS=Mus musculus GN=Atp6v1c1 PE=1 SV=4	0.0771515	0.330051	0.9992
Q9Z1N5	DX39B_MOUSE	Spliceosome RNA helicase Ddx39b OS=Mus musculus GN=Ddx39b PE=1 SV=1	0.0329089	0.734338	0.9992
Q9Z1Q9	SYVC_MOUSE	Valine--tRNA ligase OS=Mus musculus GN=Vars PE=1 SV=1	-0.0799524	0.449066	0.9992
Q9Z1R2	BAG6_MOUSE	Large proline-rich protein BAG6 OS=Mus musculus GN=Bag6 PE=1 SV=1	0.313583	0.123322	0.9992
Q9Z1Z0	USO1_MOUSE	General vesicular transport factor p115 OS=Mus musculus GN=Uso1 PE=1 SV=2	-0.00256962	0.973782	0.9992
Q9Z1Z2	STRAP_MOUSE	Serine-threonine kinase receptor-associated protein OS=Mus musculus GN=Strap PE=1 SV=2	0.0859027	0.293179	0.9992
Q9Z268	RASL1_MOUSE	RasGAP-activating-like protein 1 OS=Mus musculus GN=Rasal1 PE=1 SV=2	0.014895	0.909207	0.9992
Q9Z2H5	E41L1_MOUSE	Band 4.1-like protein 1 OS=Mus musculus GN=Epb41l1 PE=1 SV=2	-0.0454131	0.38883	0.9992
Q9Z2U1	PSA5_MOUSE	Proteasome subunit alpha type-5 OS=Mus musculus GN=Psma5 PE=1 SV=1	-0.0230255	0.878351	0.9992
Q9Z2W0	DNPEP_MOUSE	Aspartyl aminopeptidase OS=Mus musculus GN=Dnpep PE=1 SV=2	-0.245231	0.380404	0.9992
O35286	DHX15_MOUSE	Pre-mRNA-splicing factor ATP-dependent RNA helicase DHX15 OS=Mus musculus GN=Dhx15 PE=1 SV=2	-5.75412e-05	0.999388	0.999995
O54984	ASNA_MOUSE	ATPase Asna1 OS=Mus musculus GN=Asna1 PE=1 SV=2	-0.000629209	0.995648	0.999995
P46935	NEDD4_MOUSE	E3 ubiquitin-protein ligase NEDD4 OS=Mus musculus GN=Nedd4 PE=1 SV=3	6.15844e-07	0.999995	0.999995
Q61879	MYH10_MOUSE	Myosin-10 OS=Mus musculus GN=Myh10 PE=1 SV=2	0.000226287	0.997223	0.999995
Q99JX3	GORS2_MOUSE	Golgi reassembly-stacking protein 2 OS=Mus musculus GN=Gorasp2 PE=1 SV=3	-0.000408262	0.997986	0.999995
Q9WVJ2	PSD13_MOUSE	26S proteasome non-ATPase regulatory subunit 13 OS=Mus musculus GN=Psmd13 PE=1 SV=1	-0.00394739	0.993655	0.999995
